# Supplementary material for: 2-Pyridinyl β-ketones as new ligands for room-temperature CuI-catalysed C–N coupling reactions
Source: Royal Society of Chemistry journal article supplement (doi:10.1039/b821212k), 2009-01-01
Supplement: b821212k.pdf [file b821212k.pdf]

## Supporting Information

# 2-Pyridinyl- $\beta$ -Ketones as New Ligands for Room-Temperature CuI-Catalyzed C-N Coupling Reaction

Deping Wang<sup>a, b</sup> and Ke Ding\*<sup>a</sup>

<sup>a</sup> *Laboratory of Regenerative Biology and State Key Laboratory of Respiratory Diseases, Guangzhou Institute of Biomedicine and Health, Chinese Academy of Sciences International Business Incubator A-3, Guangzhou Science Park, Guangzhou 510663, China.*

<sup>b</sup> *Graduate School of the Chinese Academy of Sciences, Chinese Academy of Sciences.*

### General Experimental Procedures

All reactions were carried out in 5 mL sealed tubes, under a pure and dry Argon atmosphere. DMF was distilled from CaH<sub>2</sub> and was stored on 4 Å activated molecular sieves. Cesium carbonate (Alfa Aesar) were stored in the presence of P<sub>2</sub>O<sub>5</sub> in a benchtop desiccator at room temperature and weighed in the air quickly. CuI, Aryl iodides, aryl bromides and amines were purchased from commercial sources (Aldrich, Acros, 3B, Alfa Aesar) and in most cases used directly without further purification. The ligand **F** N-(pyridin-2-yl)acetamide was purchased from TCI and were used as received. Column chromatography was performed with QDHY 60 A C.C silica gel (35-70 mm). All products were characterized by their NMR, GC/MS or LC/MS. NMR spectra were recorded at 20 °C on a Bruker AC 400 MHz spectrometer working respectively at 400 MHz for <sup>1</sup>H, at 100 MHz for <sup>13</sup>C. Optical rotations were obtained on a polarimeter, specific rotations ([ $\alpha$ ]<sub>D</sub>) are reported in deg/dm and the concentration (*c*) is given in g/100 mL in the specified solvent. Gas chromatography - mass spectra (GC/MS) were recorded on an Shimadzu Technologies QP2010 plus instrument with a mass detector (EI) and a Rtx-MS 30 m x 0.32 mm capillary apolar column (Stationary phase: 5 % diphenyldimethylpolysiloxane film, 0.25  $\mu$ m). GC/MS method: Initial temperature: 80 °C; Initial time: 3 min; Ramp: 30 °C/min; Final temperature: 280 °C; Final time: 15 min. Gas chromatography - mass spectra (GC/MS) were recorded on an Agilent1200. FAB+ mass spectra and HRMS were recorded on a Thermo Finnigan MAT-95XP spectrometer (3 keV, xenon) in a m-nitrobenzylalcohol matrix. The first order peak patterns are indicated as s (singlet), d (doublet), t (triplet), q (quadruplet). Complex nonfirst-order signals are indicated as m (multiplet).

### Preparation of Ligands: 2-Pyridinyl- $\beta$ -Ketones

**Preparation of 2-Acetylpyridine (A)** This procedure was adapted with minor modify from the synthesis reported by Kurashina Yoshikazu and coworkers.<sup>1</sup>

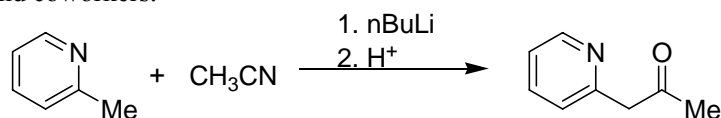

To a solution of 32 mmol of nBuLi in 60 ml THF was added dropwise 2.96 ml (32 mmol) of 2-methylpyridine at 0 °C under an Argon, the reaction mixture was stirred for 45 min at 0 °C. To the reaction mixture was added 1.56 ml (32 mmol) of acetonitrile and the mixture was stirred for 3 hours at room temperature, followed by extraction with 30

ml of 3N-sulfuric acid. The acidic solution was washed with 2\*25 ml of diether ether, then made alkaline (PH=11~12) with a 2N-aqueous sodium hydroxide solution and the solution was extracted with dichloromethane. The organic layer was dried over anhydrous sodium sulfate and the solvent was evaporated under reduce pressure. The residual oil was distilled under vacuum to give the desired product as pale yellow oil 2.2 g (51%) (90:10 ketone: enol, only data for the major ketone form is given).

$^1\text{H NMR}(\text{CDCl}_3)$ :  $\delta$ =8.52 (d,  $J$ =4.8 Hz, 1 H; Phenyl), 7.60 (td,  $J$ =8.0, 1.6 Hz, 1 H; Phenyl), 7.20-7.15 (m, 2 H; Phenyl), 3.89 (s, 2 H;  $\text{CH}_2$ ), 2.19 ppm (s, 3 H;  $\text{CH}_3$ );  $^{13}\text{C NMR}(\text{CDCl}_3)$ :  $\delta$ =205.3 ( $-\text{C}=\text{O}$ ), 154.7, 149.5, 136.7, 124.1, 121.9 (Phenyl), 53.1 ( $\text{CH}_2$ ), 29.9 ppm ( $\text{CH}_3$ ); MS (APCI): M/Z: 136 [M-].

#### Preparation of 2-(Isobutyrylmethyl)pyridine (B)

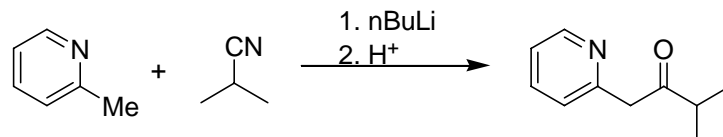

This procedure was similar with the synthesis of **A** (89:11 ketone: enol, only data for the major ketone form is given).

$^1\text{H NMR}(\text{CDCl}_3)$ :  $\delta$ =8.52 (d,  $J$ =4.8 Hz, 1 H; Phenyl), 7.60 (td,  $J$ =7.6, 1.6 Hz, 1 H; Phenyl), 7.21-7.13 (m, 2 H; Phenyl), 3.96 (s, 2 H;  $\text{CH}_2$ ), 2.80-2.74 (m, 1 H; CH), 1.11 ppm (d,  $J$ =7.2 Hz, 6 H; 2 $\text{CH}_3$ );  $^{13}\text{C NMR}(\text{CDCl}_3)$ :  $\delta$ =211.1 ( $-\text{C}=\text{O}$ ), 155.1, 149.4, 136.5, 124.2, 121.9 (Phenyl), 49.9 ( $\text{CH}_2$ ), 40.8 (CH), 18.1 ppm ( $\text{CH}_3$ ); GC/MS: rt = 5.91 min, M/Z = 163.

**Preparation of 1,1,1-trifluoro-3-(2-pyridinyl)- 2-Propanone (C)** This procedure was adapted from the synthesis reported by Masami Kawase and co-workers.<sup>2</sup>

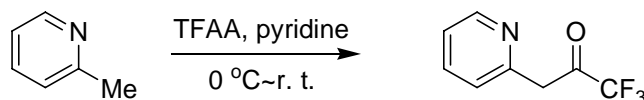

TFAA (2.6 ml, 18 mmol) was added dropwise to a solution of a 2-methylpyridine (6 mmol) and pyridine (2.4 ml, 30 ml) in anhydrous benzene (15 ml) at 0 °C. The mixture was then stirred at room temperature for 24 hours, then diluted with 3%  $\text{Na}_2\text{CO}_3$  (60 ml) and extracted with EtOAc (60 ml\*2). The combined extracts were washed with brine 60 ml, dried over anhydrous  $\text{Na}_2\text{SO}_4$ , filtered and concentrated under vacuum. The residual oil was purified by chromatography (PE-EtOAc=2:1) affording 0.9g (80%) of the desired product (1:99 ketone: enol, only data for the major enol form is given).

$^1\text{H NMR}(\text{CDCl}_3)$ :  $\delta$ =8.09 (d,  $J$ =5.6 Hz, 1 H; Phenyl), 7.69 (t,  $J$ =7.6 Hz, 1 H; Phenyl), 7.07 (d,  $J$ =8.4 Hz, 1 H; Phenyl), 7.015 (t,  $J$ =6.4 Hz, 1 H; Phenyl), 5.82 ppm (s, 1 H;  $-\text{CH}=\text{OH}$ );  $^{13}\text{C NMR}(\text{CDCl}_3)$ :  $\delta$ =155.9 ( $=\text{CH}-\text{OH}$ ), 139.2, 139.1, 122.5, 120.5, 118.1 (Phenyl), 117.8 ( $\text{CF}_3$ ), 90.3 ppm ( $-\text{CH}=\text{OH}$ ); MS (APCI): M/Z: 190 [M-].

**Preparation of 2-(2-Pyridyl)cyclohexanone (D)** A slightly modified literature procedure has been used.<sup>3</sup>

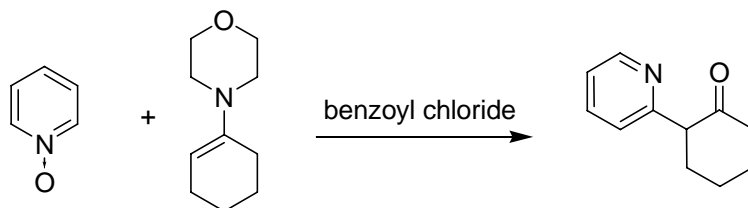

To a solution of pyridine N-oxide (4.75 g, 0.05 mol) in  $\text{CH}_2\text{Cl}_2$  (30 ml) at 0 °C was added dropwise with stirring 7.0 g (0.05 mol) of benzoyl chloride. A white precipitate formed and the mixture was stirred at 0 °C for 30 min. A solution of 4-cyclohexenylmorpholine (10.2 g, 0.06 mol) in  $\text{CH}_2\text{Cl}_2$  (15 ml) was added slowly with stirring. The

mixture was allowed to warm to room temperature and then refluxed for 5 hours. The solvent was removed under reduced pressure and to the remaining orange oil was added 20% HCl solution (60 ml). The mixture was washed several times with ether. The aqueous solution was adjusted to pH=8 with dilute NaOH solution and the oil which separated was extracted with CH<sub>2</sub>Cl<sub>2</sub>. The organic layer was dried over anhydrous Na<sub>2</sub>SO<sub>4</sub> and evaporated under vacuum to give 15.6 g of a brown oil. Distillation under reduce pressure gave 4.2g (48%) of pure desired product as a pale yellow liquid(*a mixture of ketone- enol 1:1*); MS (APCI): M/Z: 176 [M-].

**Preparation of 3-methyl-1-(2-pyridin)-2-butanol (E)** This procedure was similar from the synthesis reported by Kurashina Yoshikazu and coworkers.<sup>1</sup>

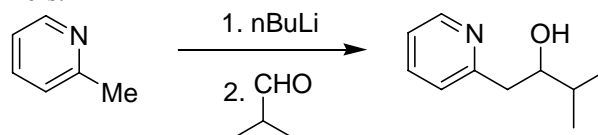

To a solution of 32 mmol of nBuLi in 60 ml THF was added dropwise 2.96 ml (32 mmol) of 2-methylpyridine at 0 °C under an Argon, the reaction mixture was stirred for 45 min at 0 °C. To the reaction mixture was added 2.3g (32 mmol) of isobutyraldehyde and the mixture was stirred for 3 hours at room temperature, followed by addition with 30 ml of saturated aqueous of NH<sub>4</sub>Cl. The mixture was extracted with dichloromethane. The organic layer was dried over anhydrous sodium sulfate and the solvent was evaporated under reduce pressure. The residual oil was distilled under vacuum to give the desired product as colourless oil 2.65g (racemic 50%).

<sup>1</sup>H NMR(CDCl<sub>3</sub>): δ=8.47 (d, *J*=4.8 Hz, 1 H; Phenyl), 7.59 (td, *J*=7.6, 1.2 Hz, 1 H; Phenyl), 7.17-7.13 (m, 2 H; Phenyl), 4.66 (br, 1H; OH), 3.79-3.75 (m, 1 H; -CH-O-), 2.94-2.80 (m, 2 H; CH<sub>2</sub>), 1.79-1.71 (m, 1 H; CH), 1.03-0.98 ppm (m, 6 H; 2CH<sub>3</sub>); <sup>13</sup>C NMR(CDCl<sub>3</sub>) : δ=160.7, 148.5, 136.7, 123.8, 121.4 (Phenyl), 75.9 (-CH-O-), 40.3 (CH), 33.5 (CH), 18.6 (CH<sub>3</sub>), 18.0 ppm (CH<sub>3</sub>); GC/MS: rt = 6.12 min, M/Z = 164.

**Preparation of 8-acetyl-5,6,7,8-tetrahydroquinoline (G)** This procedure was similar with the synthesis of **A** with yield: 46%, (*81:19 ketone: enol, only data for the major ketone form is given*).

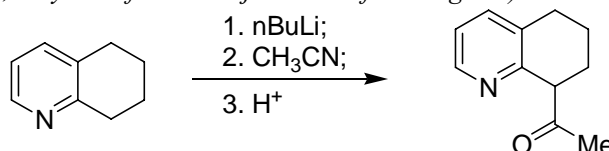

<sup>1</sup>H NMR(CDCl<sub>3</sub>): δ=8.41 (s, 1 H; Phenyl), 7.42 (d, *J*=7.6 Hz, 1 H; Phenyl), 7.09 (t, *J*=7.2 Hz, 1 H; Phenyl), 4.01 (t, *J*=6.4 Hz, 1 H; CH), 2.882-2.78 (m, 2 H; CH<sub>2</sub>), 2.25 (s, 3 H; CH<sub>3</sub>), 2.16-2.12 (m, 2 H; CH<sub>2</sub>), 1.81 ppm (br, 2 H; CH<sub>2</sub>); <sup>13</sup>C NMR(CDCl<sub>3</sub>) : δ=209.8 (-C=O), 162.6, 154.6, 147.2, 137.1, 132.8, 121.9 (Phenyl), 55.5 (CH), 29.1, 28.4, 25.9, 20.3 ppm (CH<sub>2</sub>); GC/MS: rt = 7.09 min, M/Z = 175; HRMS (EI): calcd for C<sub>11</sub>H<sub>13</sub>NO : 175.0992 [M+]; found: 175.0996.

**Preparation of 8-(2-methyl-1-propanone)-5,6,7,8-tetrahydroquinolin (H)** This procedure was similar with the synthesis of **A** with yield: 42%, (*77:23 ketone: enol, only data for the major ketone form is given*).

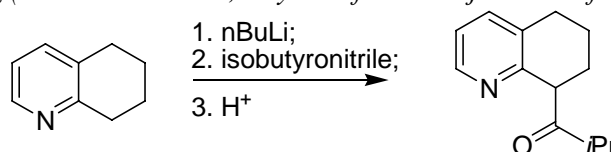

<sup>1</sup>H NMR(CDCl<sub>3</sub>): δ=8.36 (d, *J*=4.4 Hz, 1 H; Phenyl), 7.39 (d, *J*=8.0 Hz, 1 H; Phenyl), 7.06 (dd, *J*=7.6, 4.8 Hz, 1 H; Phenyl), 4.20 (t, *J*=6.8 Hz, 1 H; CH), 3.07-3.00 (m, 1 H; CH), 2.79-2.73 (m, 2 H; CH<sub>2</sub>), 2.11-2.06 (m, 2 H; CH<sub>2</sub>), 1.85-1.80 (m, 2 H; CH<sub>2</sub>), 1.20-1.14 ppm (m, 6 H; CH<sub>3</sub>); <sup>13</sup>C NMR(CDCl<sub>3</sub>) : δ=215.8 (-C=O), 155.3, 147.1, 136.9,

132.9, 121.7 (Phenyl), 53.1 (CH), 40.3 (CH), 28.4 (CH<sub>2</sub>), 26.1 (CH<sub>2</sub>), 20.2 (CH<sub>2</sub>), 18.5 ppm (CH<sub>3</sub>); GC/MS: rt = 7.57 min, M/Z = 203; HRMS (EI): calcd for C<sub>13</sub>H<sub>17</sub>NO : 203.1305 [M<sup>+</sup>]; found: 203.1301.

**Preparation of 5,6,7,8-tetrahydro-8-benzoylquinolinyl (I)** This procedure was similar with the synthesis of **A** with yield: 66%, (68:32 ketone: enol, only data for the major ketone form is given).

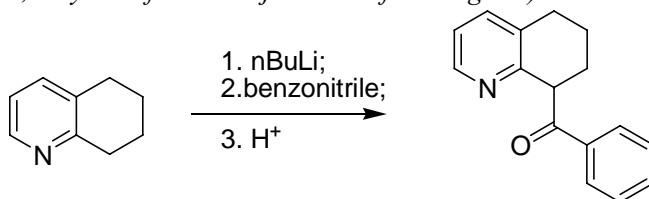

<sup>1</sup>H NMR(CDCl<sub>3</sub>): δ=8.37 (d, *J*=4.0 Hz, 1 H; Phenyl), 8.07 (d, *J*=8.0 Hz, 2 H; Phenyl), 7.60-7.36 (m, 4 H; Phenyl), 7.09 (dd, *J*=7.6, 4.8 Hz, 1 H; Phenyl), 5.02 (t, *J*=6.4 Hz, 1 H; CH), 2.85-2.78 (m, 2 H; CH<sub>2</sub>), 2.26-2.21 (m, 2 H; CH<sub>2</sub>), 1.98-1.83 (m, 2 H; CH<sub>2</sub>); <sup>13</sup>C NMR(CDCl<sub>3</sub>) : δ=202.0 (-C=O), 155.7, 147.3, 136.9, 133.3, 132.9, 128.9, 128.6, 127.9, 121.8 (Phenyl), 49.6 (CH), 28.4, 27.3, 19.9 ppm (CH<sub>2</sub>); GC/MS: rt = 9.76 min, M/Z = 236.

125237

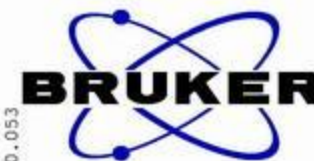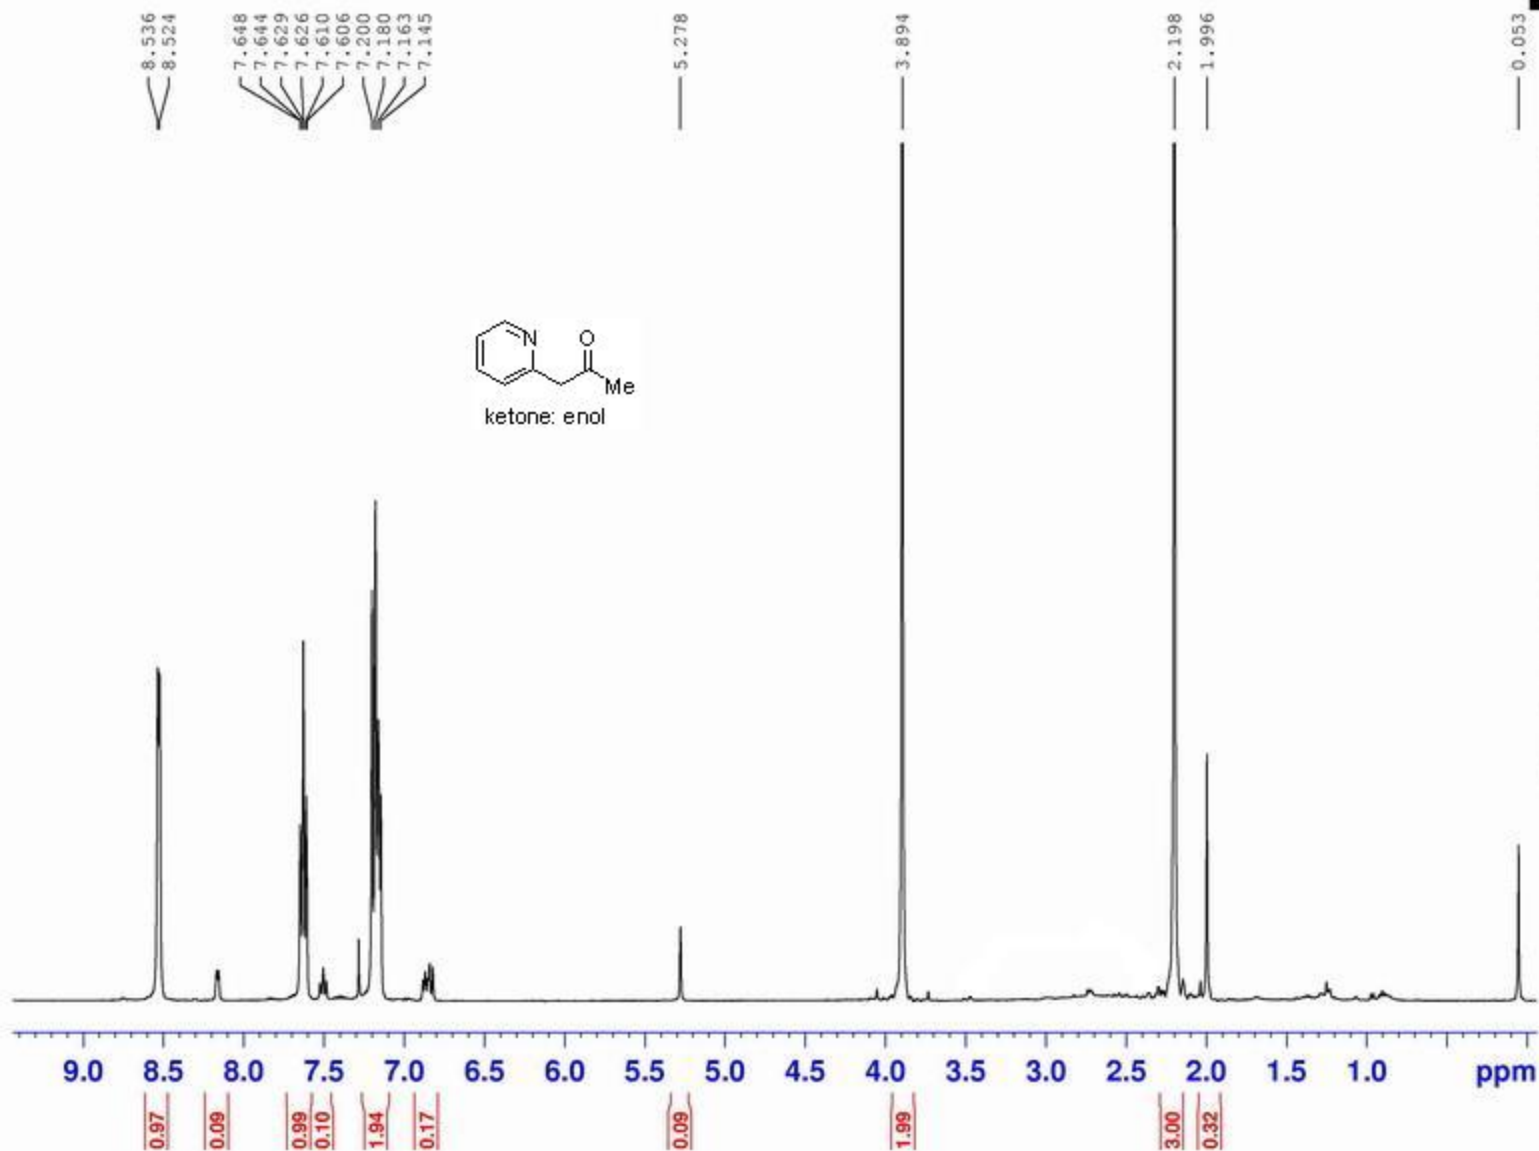

Current Data Parameters  
NAME wjp  
EXPNO 245  
PROCNO 1

F2 - Acquisition Parameters  
Date\_ 20080708  
Time 11.03  
INSTRUM spect  
PROBHD 5 mm PABBO BB-  
PULPROG zg30  
TD 65536  
SOLVENT CDCl3  
NS 2  
DS 2  
SWH 8278.146 Hz  
FIDRES 0.126314 Hz  
AQ 3.9584243 sec  
RG 71.8  
DW 60.400 usec  
DE 6.00 usec  
TE 300.4 K  
D1 1.00000000 sec  
TD0 1

----- CHANNEL f1 -----  
NUC1 1H  
P1 13.60 usec  
PL1 0.00 dB  
SFO1 400.1324710 MHz

F2 - Processing parameters  
SI 32768  
SF 400.1300000 MHz  
WDW EM  
SSB 0  
LB 0.60 Hz  
GB 0  
PC 1.00

125237

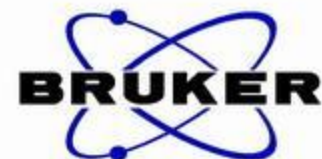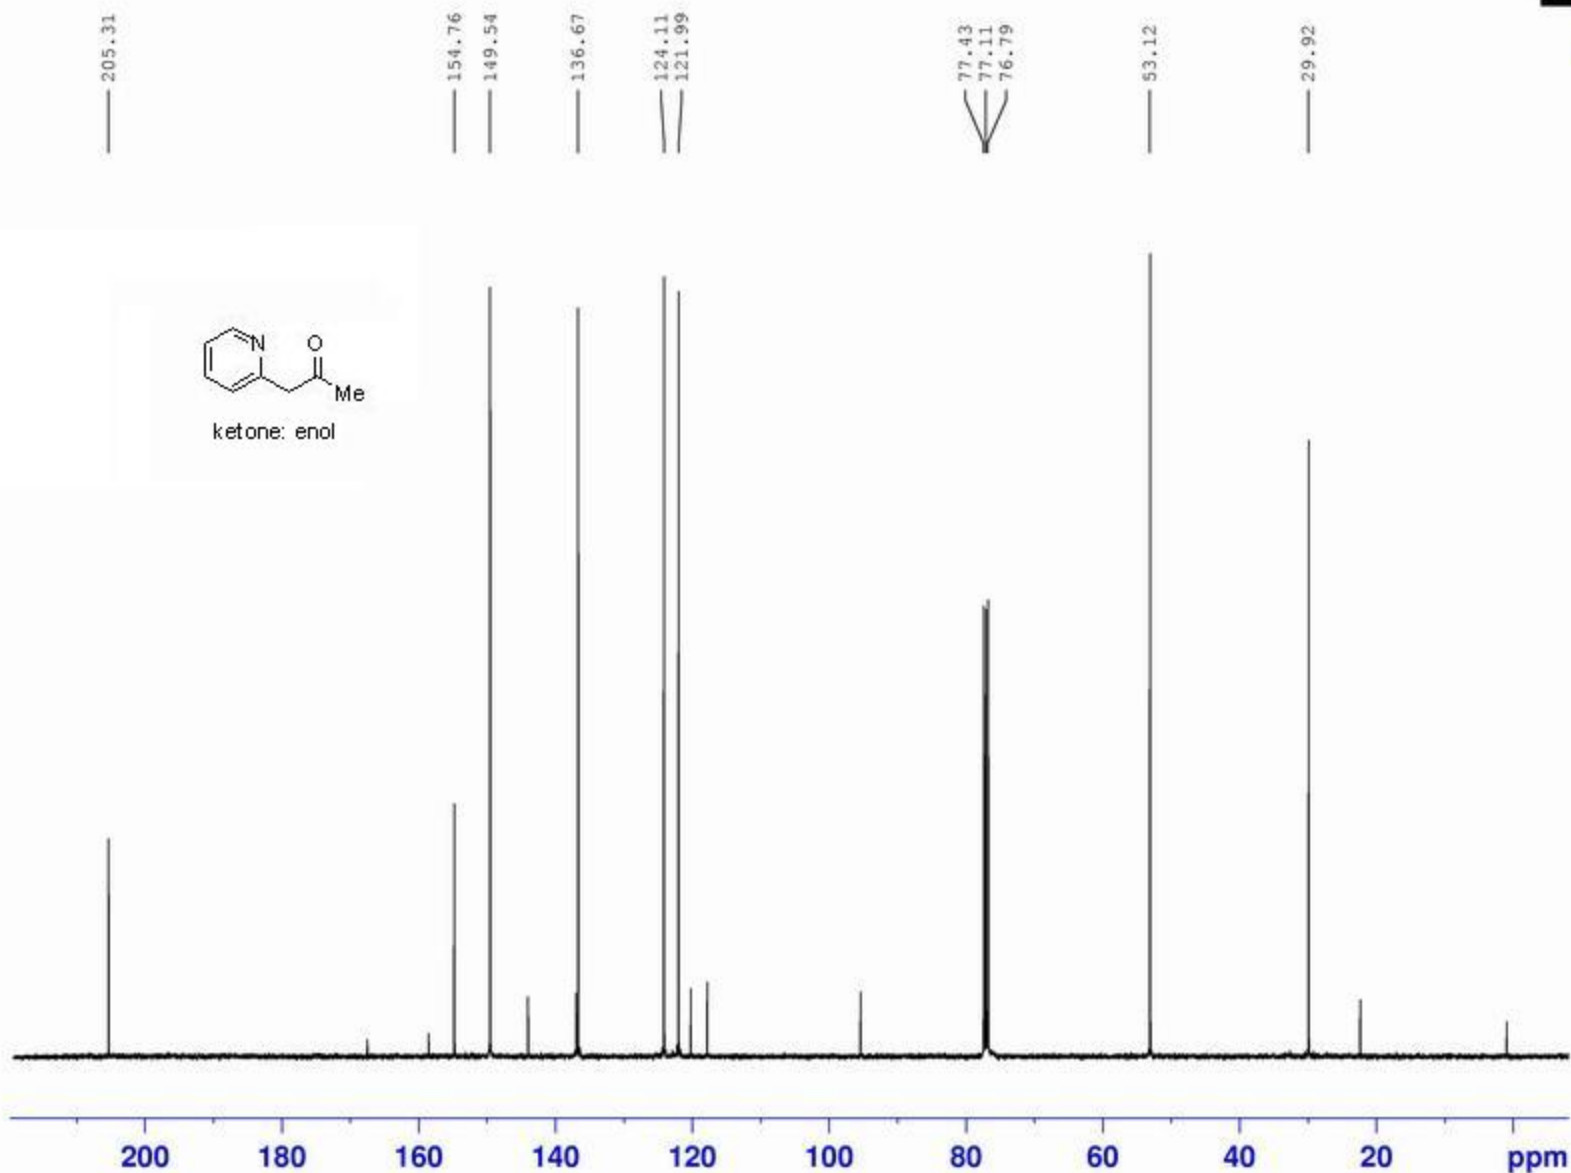

Current Data Parameters  
 NAME wdp  
 EXPNO 246  
 PROCNO 1

F2 - Acquisition Parameters  
 Date\_ 20080708  
 Time 13.21  
 INSTRUM spect  
 PROBHD 5 mm PABBO BB-  
 PULPROG zgpg30  
 TD 65536  
 SOLVENT CDCl3  
 NS 1940  
 DS 4  
 SWH 23980.814 Hz  
 FIDRES 0.365918 Hz  
 AQ 1.3664756 sec  
 RG 1024  
 DW 20.850 usec  
 DE 6.00 usec  
 TE 300.3 K  
 D1 2.0000000 sec  
 d11 0.0300000 sec  
 DELTA 1.89999998 sec  
 TDO 1

----- CHANNEL f1 -----  
 NUC1 13C  
 P1 12.20 usec  
 PL1 1.00 dB  
 SFO1 100.6228298 MHz

----- CHANNEL f2 -----  
 CPOPRG2 waltz16  
 NUC2 1H  
 PCPD2 80.00 usec  
 PL2 0.00 dB  
 PL12 15.39 dB  
 PL13 15.50 dB  
 SFO2 400.1316005 MHz

F2 - Processing parameters  
 SI 32768  
 SF 100.6127690 MHz  
 MDW EM  
 SSB 0  
 LB 1.00 Hz  
 GB 0  
 PC 1.40

12525

14.955

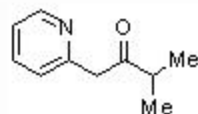

ketone: enol

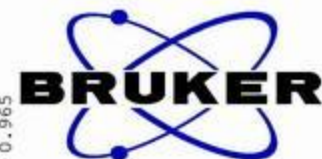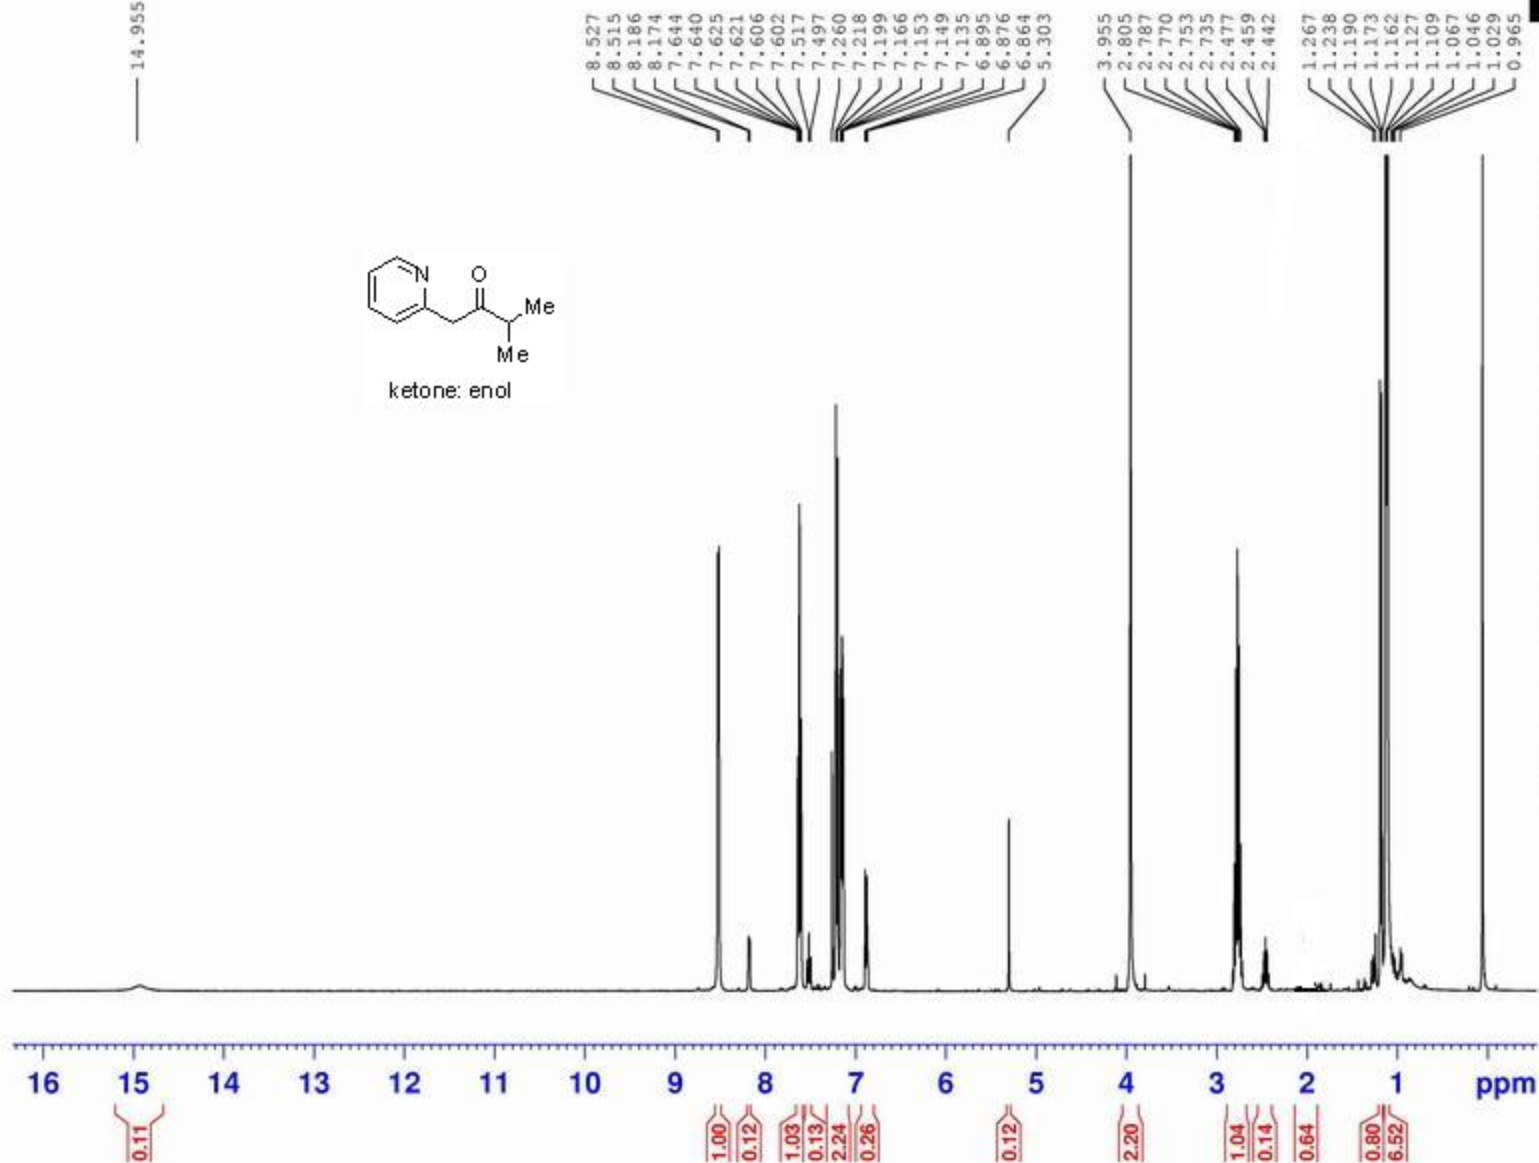

Current Data Parameters  
 NAME wdp  
 EXPNO 259  
 PROCNO 1

F2 - Acquisition Parameters  
 Date\_ 20080722  
 Time 15.35  
 INSTRUM spect  
 PROBHD 5 mm PABBO BB-  
 PULPROG zg30  
 TD 65536  
 SOLVENT CDCl3  
 NS 16  
 DS 2  
 SWH 11990.407 Hz  
 FIDRES 0.182959 Hz  
 AQ 2.7329011 sec  
 RG 90.5  
 DW 41.700 usec  
 DE 6.00 usec  
 TE 300.6 K  
 D1 1.00000000 sec  
 TDO 1

----- CHANNEL f1 -----  
 NUC1 1H  
 P1 13.60 usec  
 PL1 0.00 dB  
 SFO1 400.1324710 MHz

F2 - Processing parameters  
 SI 32768  
 SF 400.130097 MHz  
 MDW EM  
 SSB 0  
 LB 0.30 Hz  
 GB 0  
 PC 1.00

12525

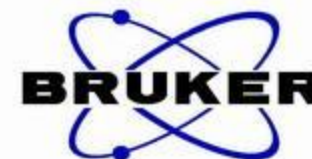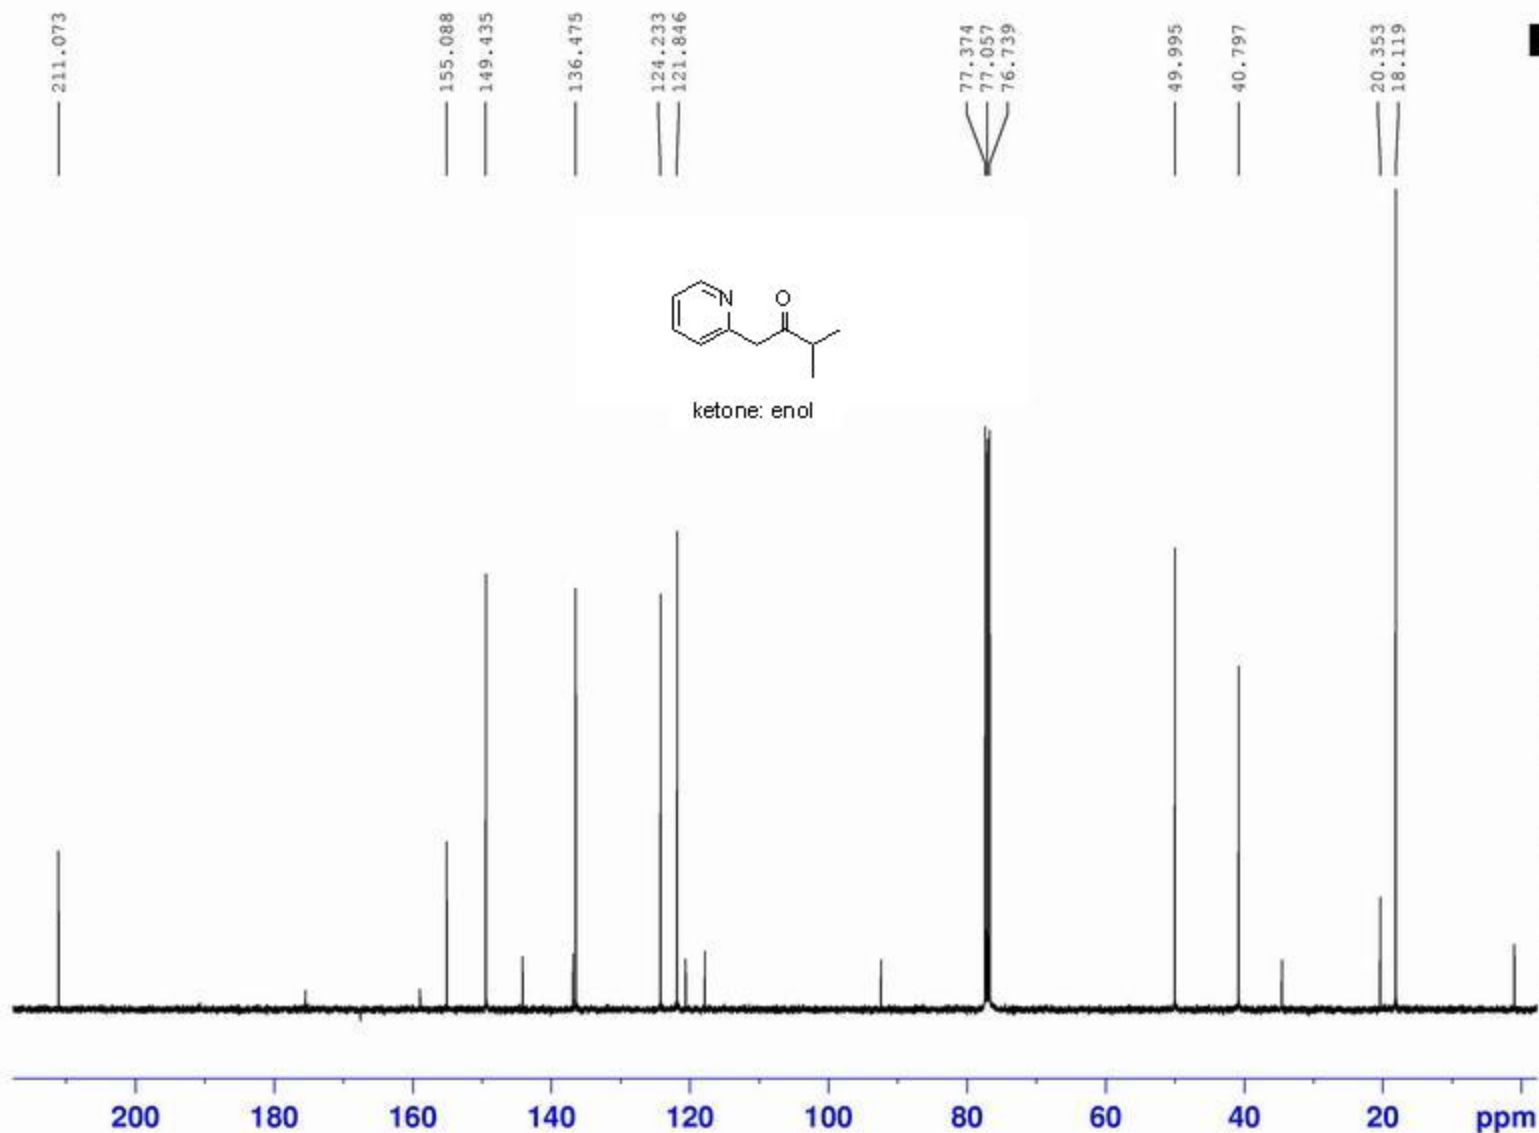

Current Data Parameters  
 NAME wdp  
 EXPNO 261  
 PROCNO 1

F2 - Acquisition Parameters  
 Date\_ 20080722  
 Time 22.43  
 INSTRUM spect  
 PROBHD 5 mm PABBO BB-  
 PULPROG zgpg30  
 TD 65536  
 SOLVENT CDCl3  
 NS 1024  
 DS 4  
 SWH 23980.814 Hz  
 FIDRES 0.365918 Hz  
 AQ 1.3664756 sec  
 RG 1824.6  
 DW 20.850 usec  
 DE 6.00 usec  
 TE 299.3 K  
 D1 2.0000000 sec  
 d11 0.0300000 sec  
 DELTA 1.8999999 sec  
 TDO 1

----- CHANNEL f1 -----  
 NUC1 13C  
 P1 12.20 usec  
 PL1 1.00 dB  
 SFO1 100.6228298 MHz

----- CHANNEL f2 -----  
 CPDPRG2 waltz16  
 NUC2 1H  
 PCPD2 80.00 usec  
 PL2 0.00 dB  
 PL12 15.39 dB  
 PL13 15.50 dB  
 SFO2 400.1316005 MHz

F2 - Processing parameters  
 SI 32768  
 SF 100.6127690 MHz  
 WDW EM  
 SSB 0  
 LB 1.00 Hz  
 CB 0  
 PC 1.40



125234

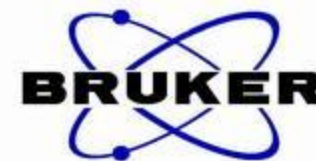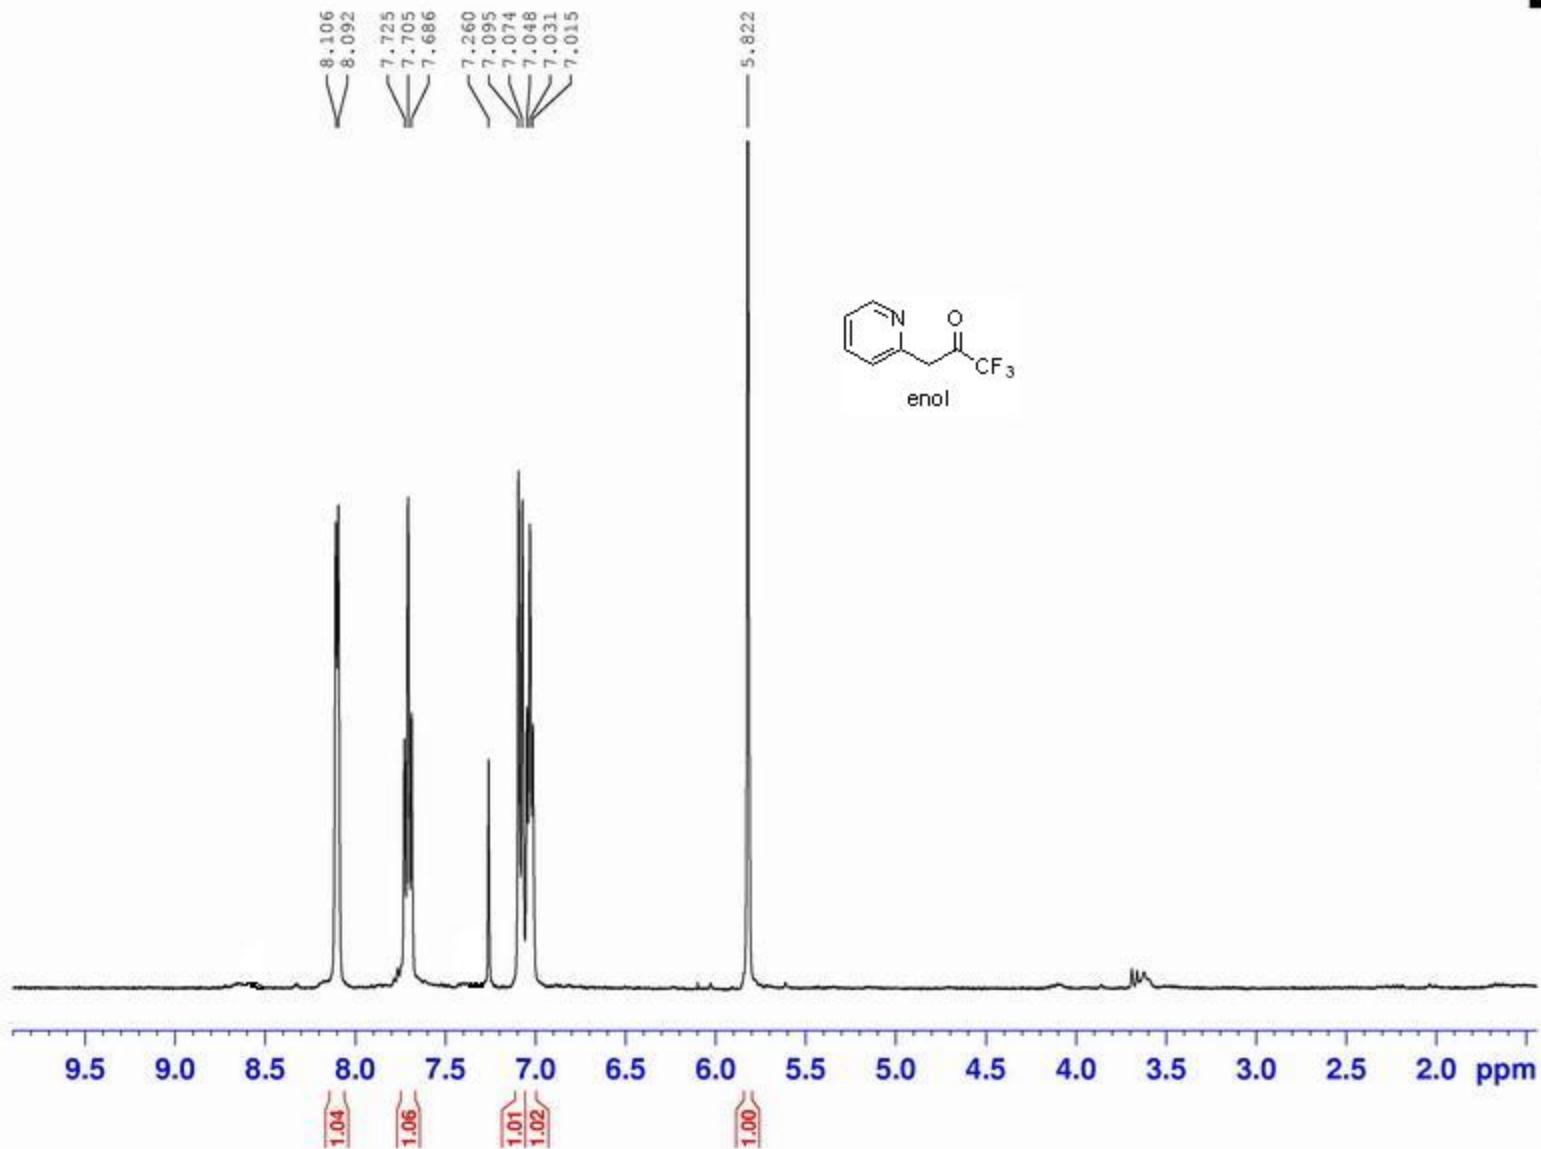

Current Data Parameters  
NAME wdp  
EXPNO 241  
PROCNO 1

F2 - Acquisition Parameters  
Date\_ 20080705  
Time 14.51  
INSTRUM spect  
PROBHD 5 mm PABBO BB-  
PULPROG zg30  
TD 65536  
SOLVENT CDCl3  
NS 2  
DS 2  
SWH 8278.146 Hz  
FIDRES 0.126314 Hz  
AQ 3.9584243 sec  
RG 256  
DW 60.400 usec  
DE 6.00 usec  
TE 300.2 K  
D1 1.00000000 sec  
TD0 1

----- CHANNEL f1 -----  
NUC1 1H  
P1 13.60 usec  
PL1 0.00 dB  
SFO1 400.1324710 MHz

F2 - Processing parameters  
SI 32768  
SF 400.1300092 MHz  
WDW EM  
SSB 0  
LB 0.30 Hz  
GB 0  
PC 1.00

125234

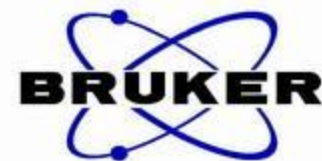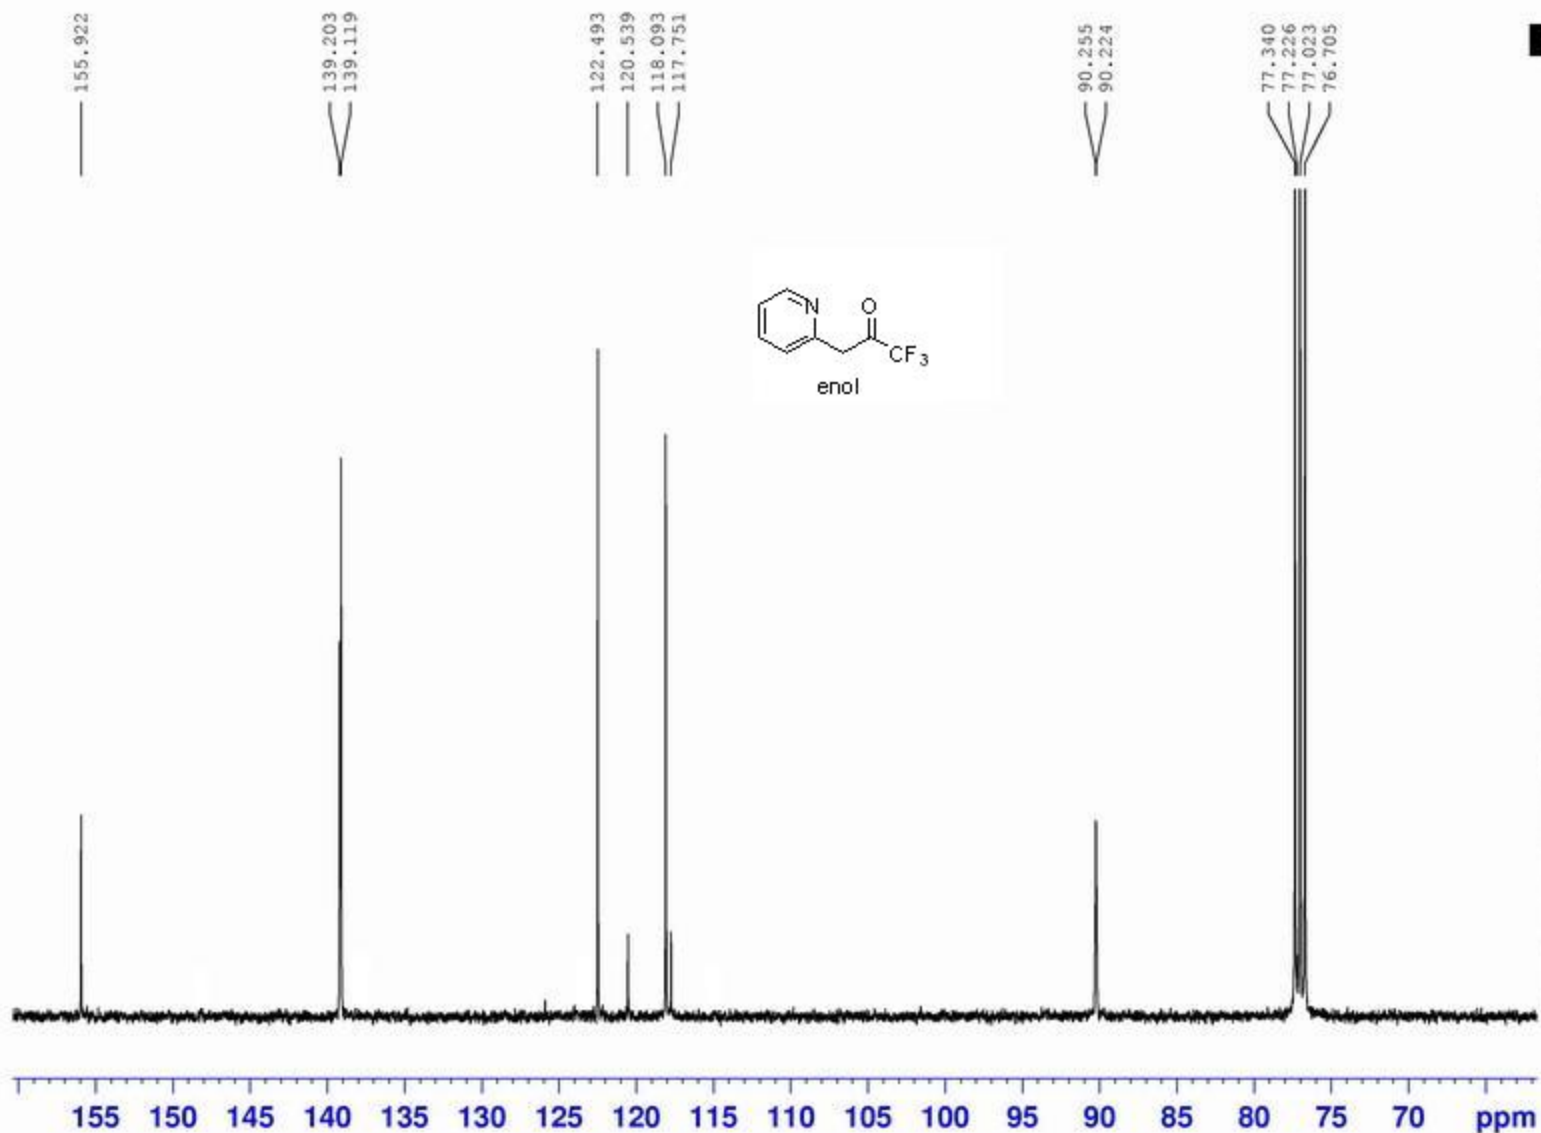

Current Data Parameters  
 NAME wdp  
 EXPNO 242  
 PROCNO 1

F2 - Acquisition Parameters  
 Date\_ 20080707  
 Time 13.37  
 INSTRUM spect  
 PROBHD 5 mm PABBO BB-  
 PULPROG zgpg30  
 TD 65536  
 SOLVENT CDCl3  
 NS 2048  
 DS 4  
 SWH 23980.814 Hz  
 FIDRES 0.365918 Hz  
 AQ 1.3664756 sec  
 RG 724.1  
 DW 20.850 usec  
 DE 6.00 usec  
 TE 303.2 K  
 D1 2.0000000 sec  
 d11 0.0300000 sec  
 DELTA 1.8999999 sec  
 TDO 1

----- CHANNEL f1 -----  
 NUC1 13C  
 P1 12.20 usec  
 PL1 1.00 dB  
 SFO1 100.6228298 MHz

----- CHANNEL f2 -----  
 CPDPRG2 waltz16  
 NUC2 1H  
 PCPD2 80.00 usec  
 PL2 0.00 dB  
 PL12 15.39 dB  
 PL13 15.50 dB  
 SFO2 400.1316005 MHz

F2 - Processing parameters  
 SI 32768  
 SF 100.6127690 MHz  
 WDW EM  
 SSB 0  
 LB 1.00 Hz  
 CB 0  
 PC 1.40

wdp-53783

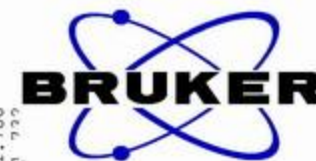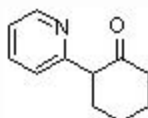

ketone: enol

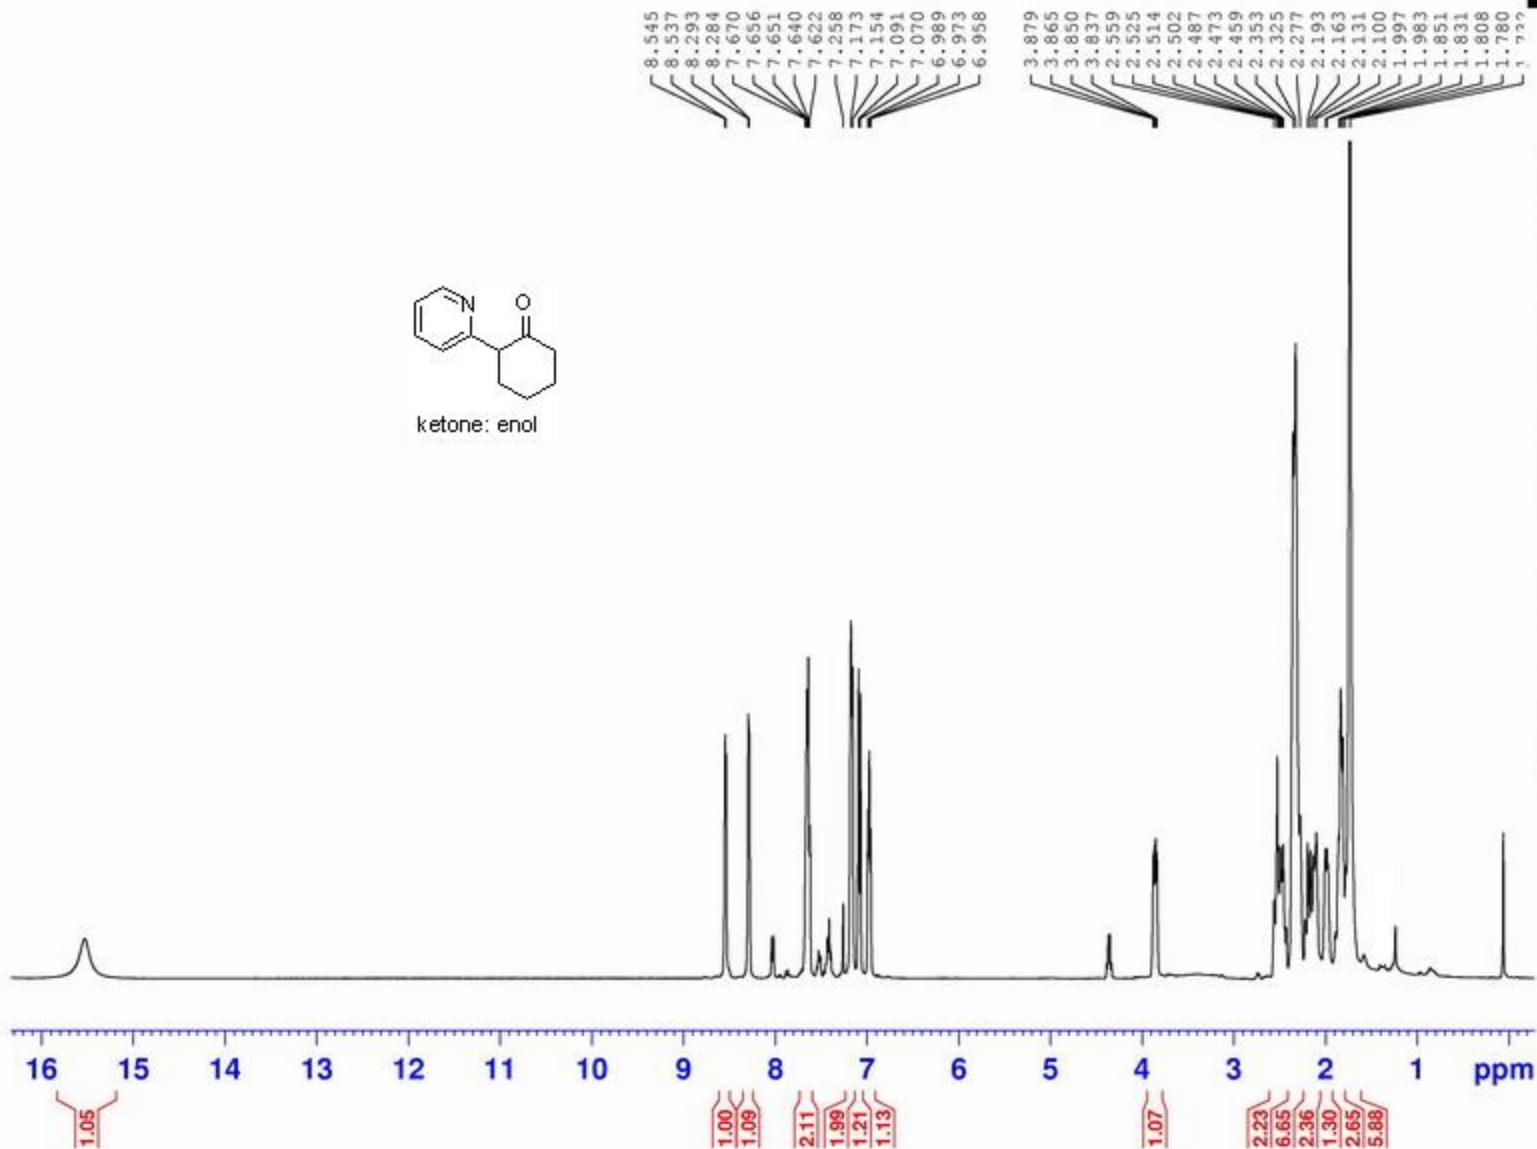

Current Data Parameters  
NAME wdp  
EXPNO 225  
PROCNO 1

F2 - Acquisition Parameters  
Date\_ 20080519  
Time 13.48  
INSTRUM spect  
PROBHD 5 mm PABBO BB-  
PULPROG zg30  
TD 65536  
SOLVENT CDCl3  
NS 16  
DS 2  
SWH 8278.146 Hz  
FIDRES 0.126314 Hz  
AQ 3.9584243 sec  
RG 64  
DW 60.400 usec  
DE 6.00 usec  
TE 295.6 K  
D1 1.00000000 sec  
TD0 1

----- CHANNEL f1 -----  
NUC1 1H  
P1 13.60 usec  
PL1 0.00 dB  
SFO1 400.1324710 MHz

F2 - Processing parameters  
SI 32768  
SF 400.1300096 MHz  
WDW EM  
SSB 0  
LB 1.00 Hz  
GB 0  
PC 1.00

125250

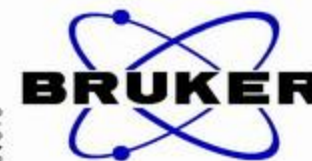

8.479  
8.467  
7.635  
7.631  
7.615  
7.612  
7.596  
7.593  
7.284  
7.168  
7.160  
7.148  
7.128

3.797  
3.791  
3.783  
3.775  
3.768  
3.760  
3.754  
2.937  
2.930  
2.900  
2.893  
2.860  
2.837  
2.823  
2.800  
1.793  
1.776  
1.760  
1.743  
1.727  
1.711  
1.258  
1.040  
1.026  
1.009  
0.994  
0.977  
0.949  
0.933  
0.918  
0.906  
0.889  
0.879  
0.078

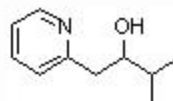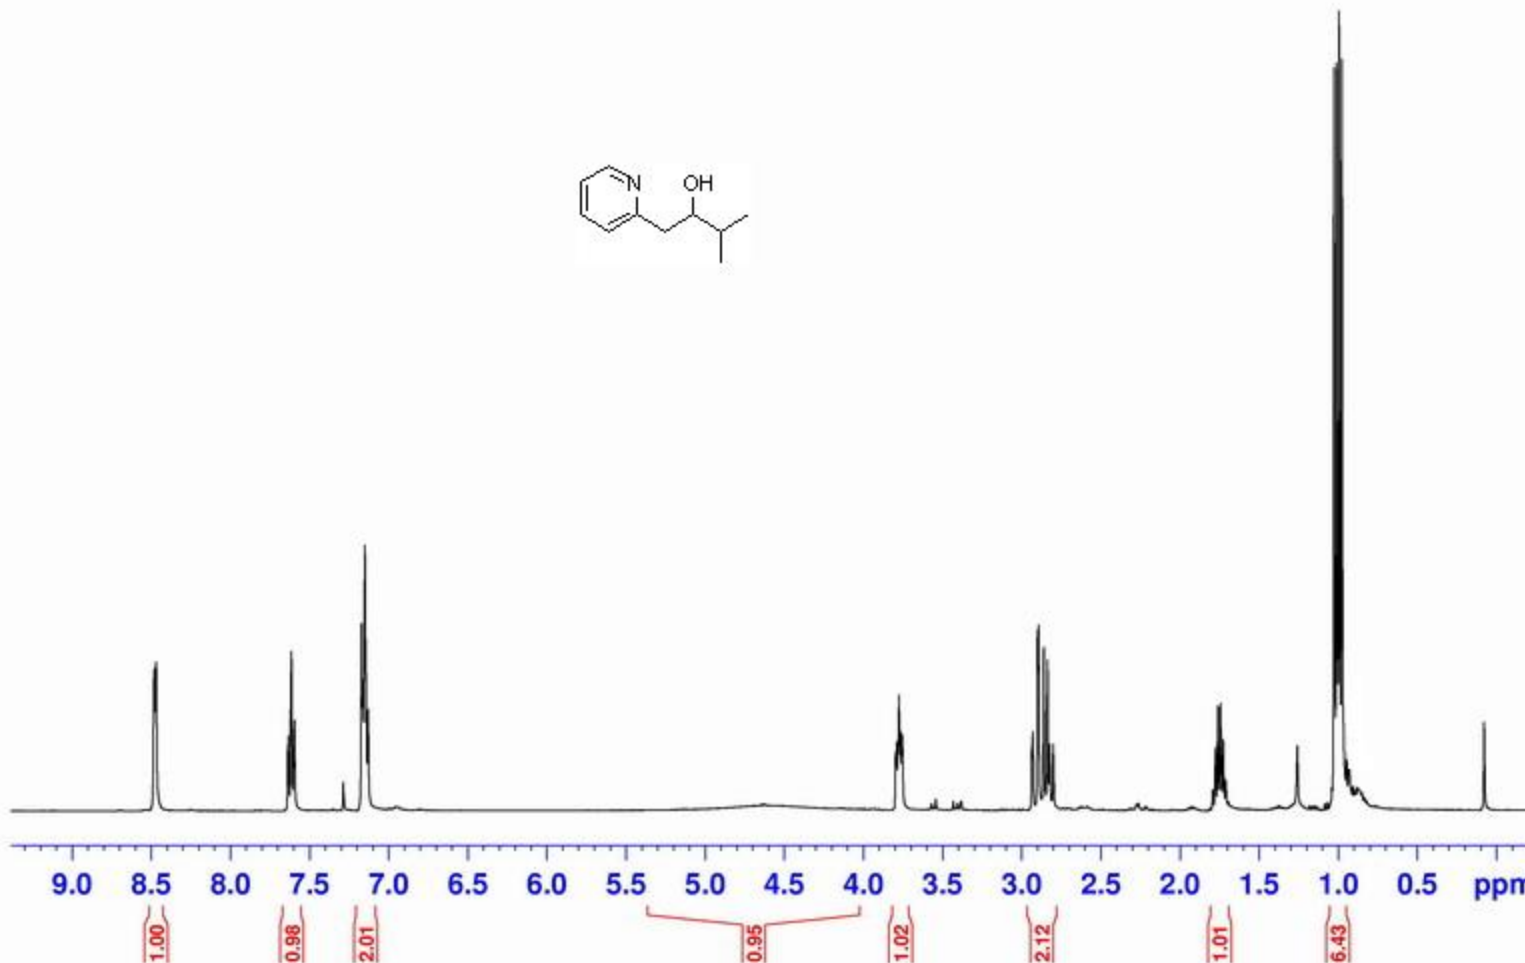

Current Data Parameters  
NAME wdp  
EXPNO 251  
PROCNO 1

F2 - Acquisition Parameters  
Date\_ 20080721  
Time 15.09  
INSTRUM spect  
PROBHD 5 mm PABBO BB-  
PULPROG zg30  
TD 65536  
SOLVENT CDCl3  
NS 2  
DS 2  
SWH 8278.146 Hz  
FIDRES 0.126314 Hz  
AQ 3.9584243 sec  
RG 50.8  
DW 60.400 usec  
DE 6.00 usec  
TE 300.9 K  
D1 1.00000000 sec  
TD0 1

----- CHANNEL f1 -----  
NUC1 1H  
P1 13.60 usec  
PL1 0.00 dB  
SFO1 400.1324710 MHz

F2 - Processing parameters  
SI 32768  
SF 400.1300000 MHz  
WDW EM  
SSB 0  
LB 0.30 Hz  
GB 0  
PC 1.00

125250

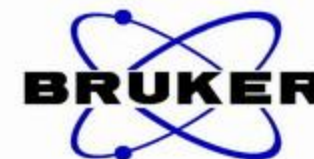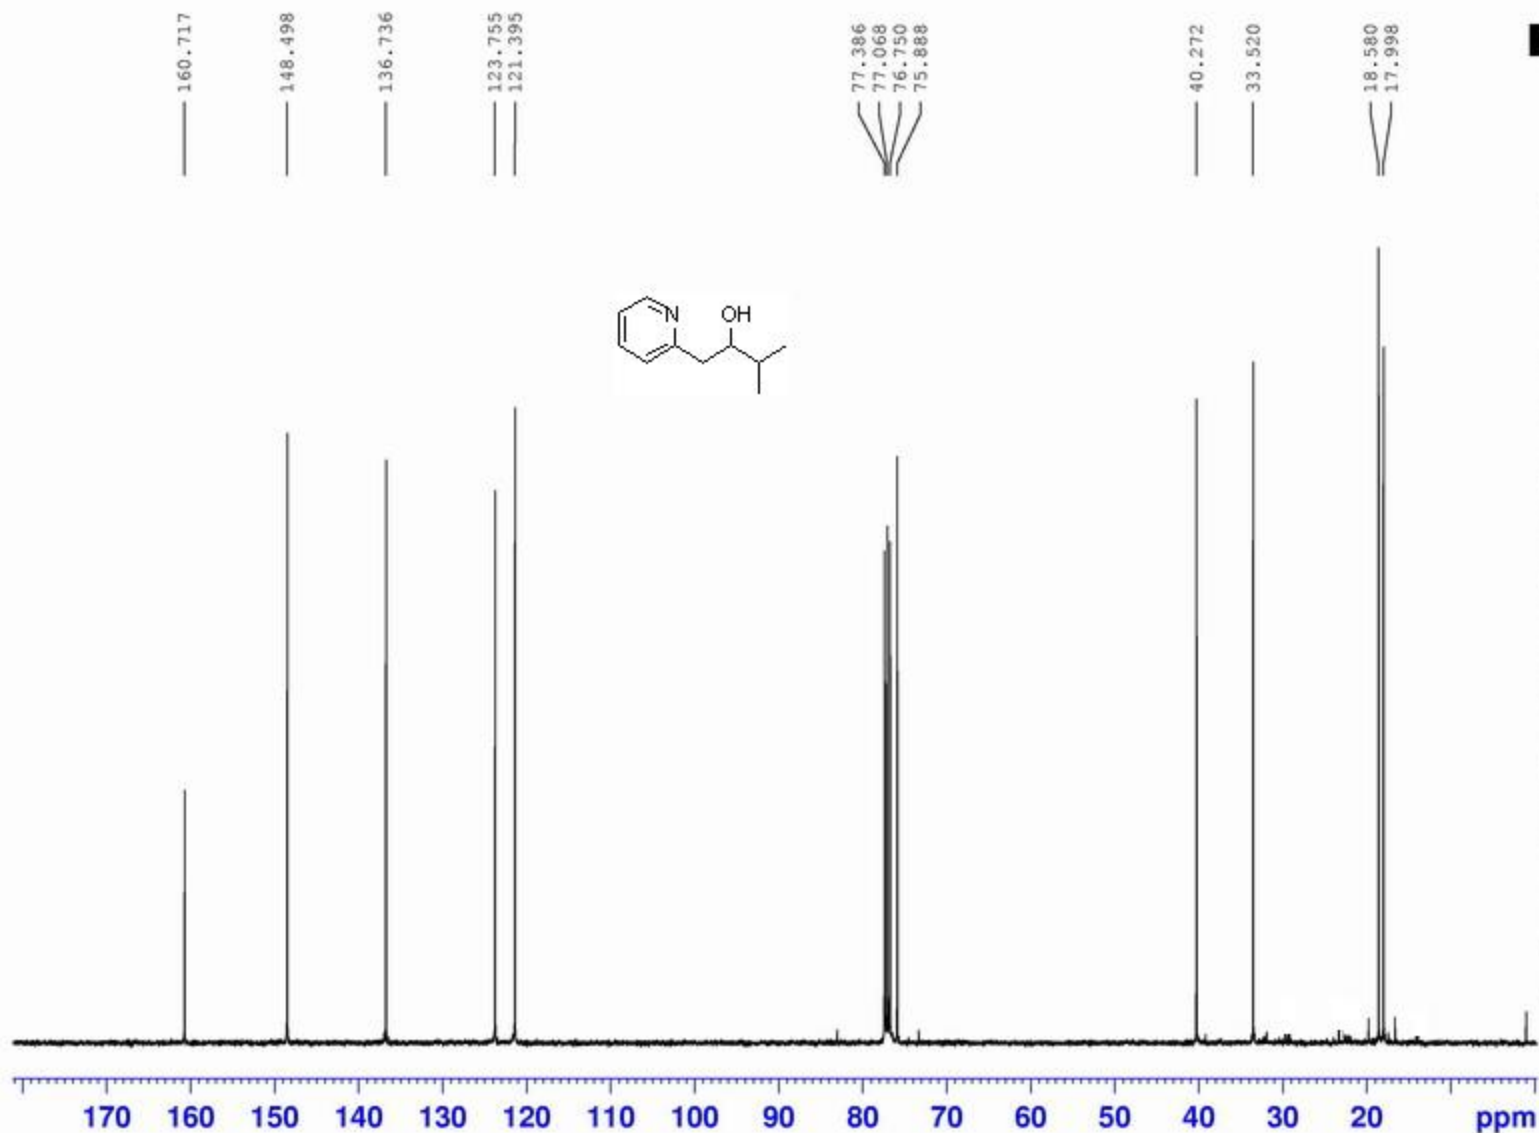

Current Data Parameters  
NAME wdp  
EXPNO 258  
PROCNO 1

F2 - Acquisition Parameters  
Date\_ 20080722  
Time 13.30  
INSTRUM spect  
PROBHD 5 mm PABBO BB-  
PULPROG zgpg30  
TD 65536  
SOLVENT CDCl3  
NS 1955  
DS 4  
SWH 23980.814 Hz  
FIDRES 0.365918 Hz  
AQ 1.3664756 sec  
RG 1149.4  
DW 20.850 usec  
DE 6.00 usec  
TE 299.6 K  
D1 2.00000000 sec  
d11 0.03000000 sec  
DELTA 1.89999999 sec  
TDO 1

----- CHANNEL f1 -----  
NUC1 13C  
P1 12.20 usec  
PL1 1.00 dB  
SFO1 100.6228298 MHz

----- CHANNEL f2 -----  
CPDPRG2 waltz16  
NUC2 1H  
PCPD2 80.00 usec  
PL2 0.00 dB  
PL12 15.39 dB  
PL13 15.50 dB  
SFO2 400.1316005 MHz

F2 - Processing parameters  
SI 32768  
SF 100.6127690 MHz  
WDW EM  
SSB 0  
LB 1.00 Hz  
CB 0  
PC 1.40

125257

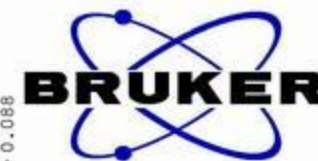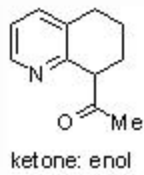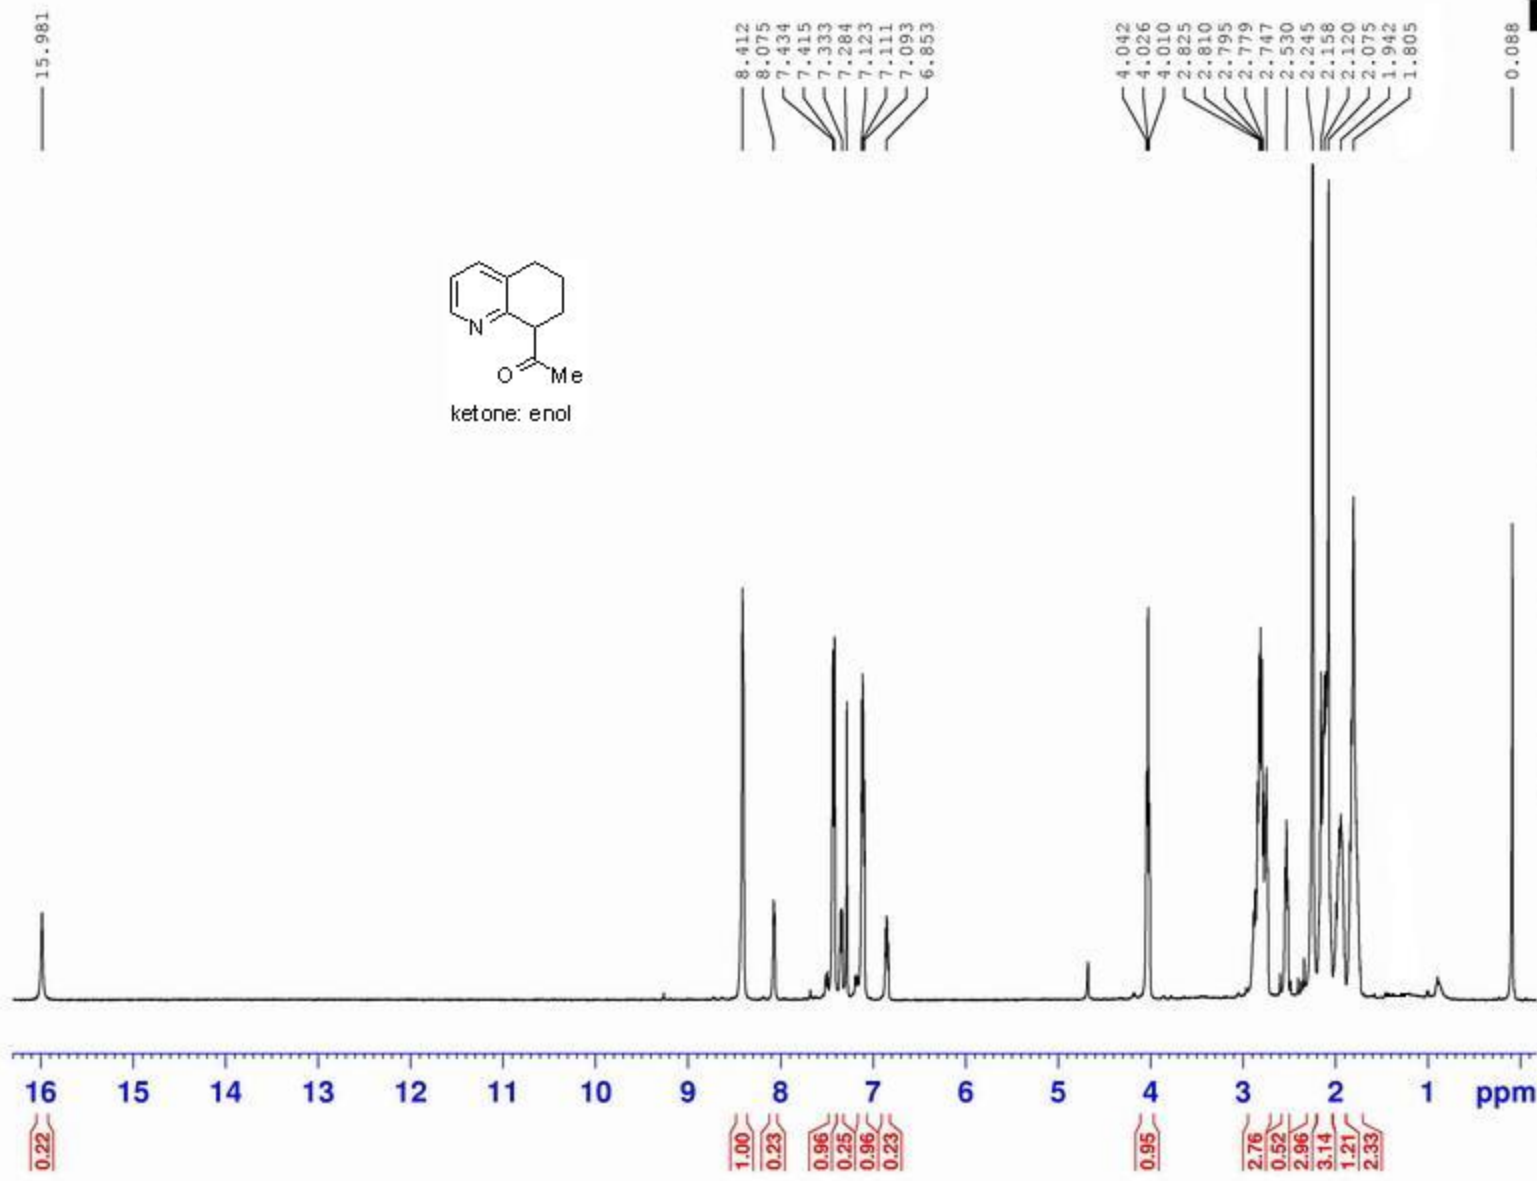

Current Data Parameters  
 NAME wdp  
 EXPNO 262  
 PROCNO 1

F2 - Acquisition Parameters  
 Date\_ 20080724  
 Time 15.19  
 INSTRUM spect  
 PROBHD 5 mm PABBO BB-  
 PULPROG zg30  
 TD 65536  
 SOLVENT CDCl3  
 NS 16  
 DS 2  
 SWH 8278.146 Hz  
 FIDRES 0.126314 Hz  
 AQ 3.9584243 sec  
 RG 203.2  
 DW 60.400 usec  
 DE 6.00 usec  
 TE 302.7 K  
 D1 1.00000000 sec  
 TD0 1

----- CHANNEL f1 -----  
 NUC1 1H  
 P1 13.60 usec  
 PL1 0.00 dB  
 SFO1 400.1324710 MHz

F2 - Processing parameters  
 SI 32768  
 SF 400.1300000 MHz  
 MDW EM  
 SSB 0  
 LB 0.30 Hz  
 GB 0  
 PC 1.00

125257

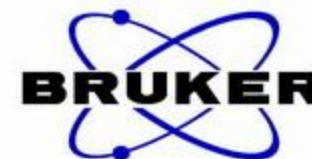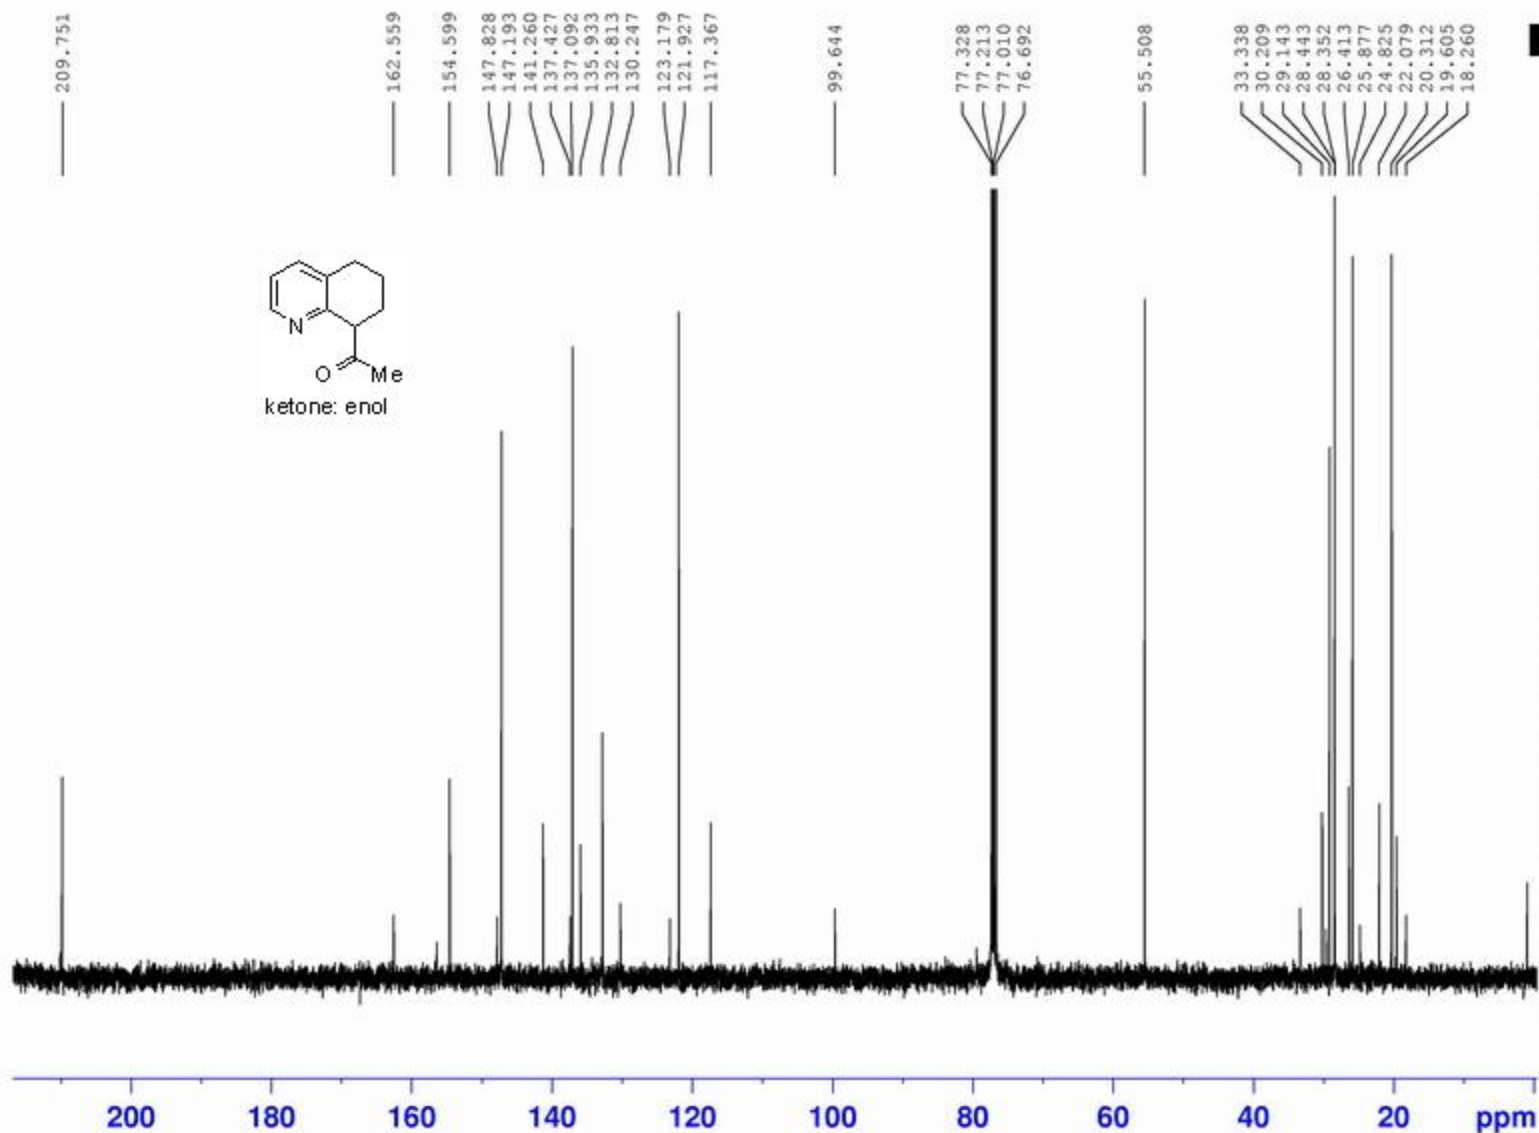

Current Data Parameters  
 NAME wdp  
 EXPNO 264  
 PROCNO 1

F2 - Acquisition Parameters  
 Date\_ 20080725  
 Time 12.24  
 INSTRUM spect  
 PROBHD 5 mm PABBO BB-  
 PULPROG zgpg30  
 TD 65536  
 SOLVENT CDCl3  
 NS 1233  
 DS 4  
 SWH 23980.814 Hz  
 FIDRES 0.365918 Hz  
 AQ 1.3664756 sec  
 RG 1024  
 DW 20.850 usec  
 DE 6.00 usec  
 TE 303.6 K  
 D1 2.00000000 sec  
 d11 0.03000000 sec  
 DELTA 1.89999999 sec  
 TDO 1

----- CHANNEL f1 -----  
 NUC1 13C  
 P1 12.20 usec  
 PL1 1.00 dB  
 SFO1 100.6228298 MHz

----- CHANNEL f2 -----  
 CPDPRG2 waltz16  
 NUC2 1H  
 PCPD2 80.00 usec  
 PL2 0.00 dB  
 PL12 15.39 dB  
 PL13 15.50 dB  
 SFO2 400.1316005 MHz

F2 - Processing parameters  
 SI 32768  
 SF 100.6127690 MHz  
 WDW EM  
 SSB 0  
 LB 1.00 Hz  
 CB 0  
 PC 1.40

125253-1

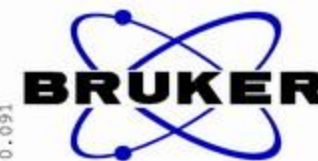

Current Data Parameters  
 NAME wdp  
 EXPNO 254  
 PROCNO 1

F2 - Acquisition Parameters  
 Date\_ 20080721  
 Time 21.04  
 INSTRUM spect  
 PROBHD 5 mm PABBO BB-  
 PULPROG zg30  
 TD 65536  
 SOLVENT CDCl3  
 NS 9  
 DS 2  
 SMH 8278.146 Hz  
 FIDRES 0.126314 Hz  
 AQ 3.9584243 sec  
 RG 101.6  
 DW 60.400 usec  
 DE 6.00 usec  
 TE 299.1 K  
 D1 1.0000000 sec  
 TD0 1

----- CHANNEL f1 -----  
 NUC1 1H  
 P1 13.60 usec  
 PL1 0.00 dB  
 SFO1 400.1324710 MHz

F2 - Processing parameters  
 SI 32768  
 SF 400.1300000 MHz  
 WDW EM  
 SSB 0  
 LB 0.30 Hz  
 GB 0  
 PC 1.00

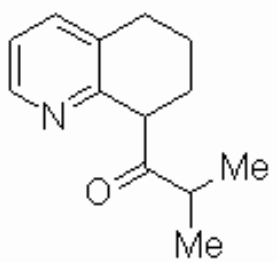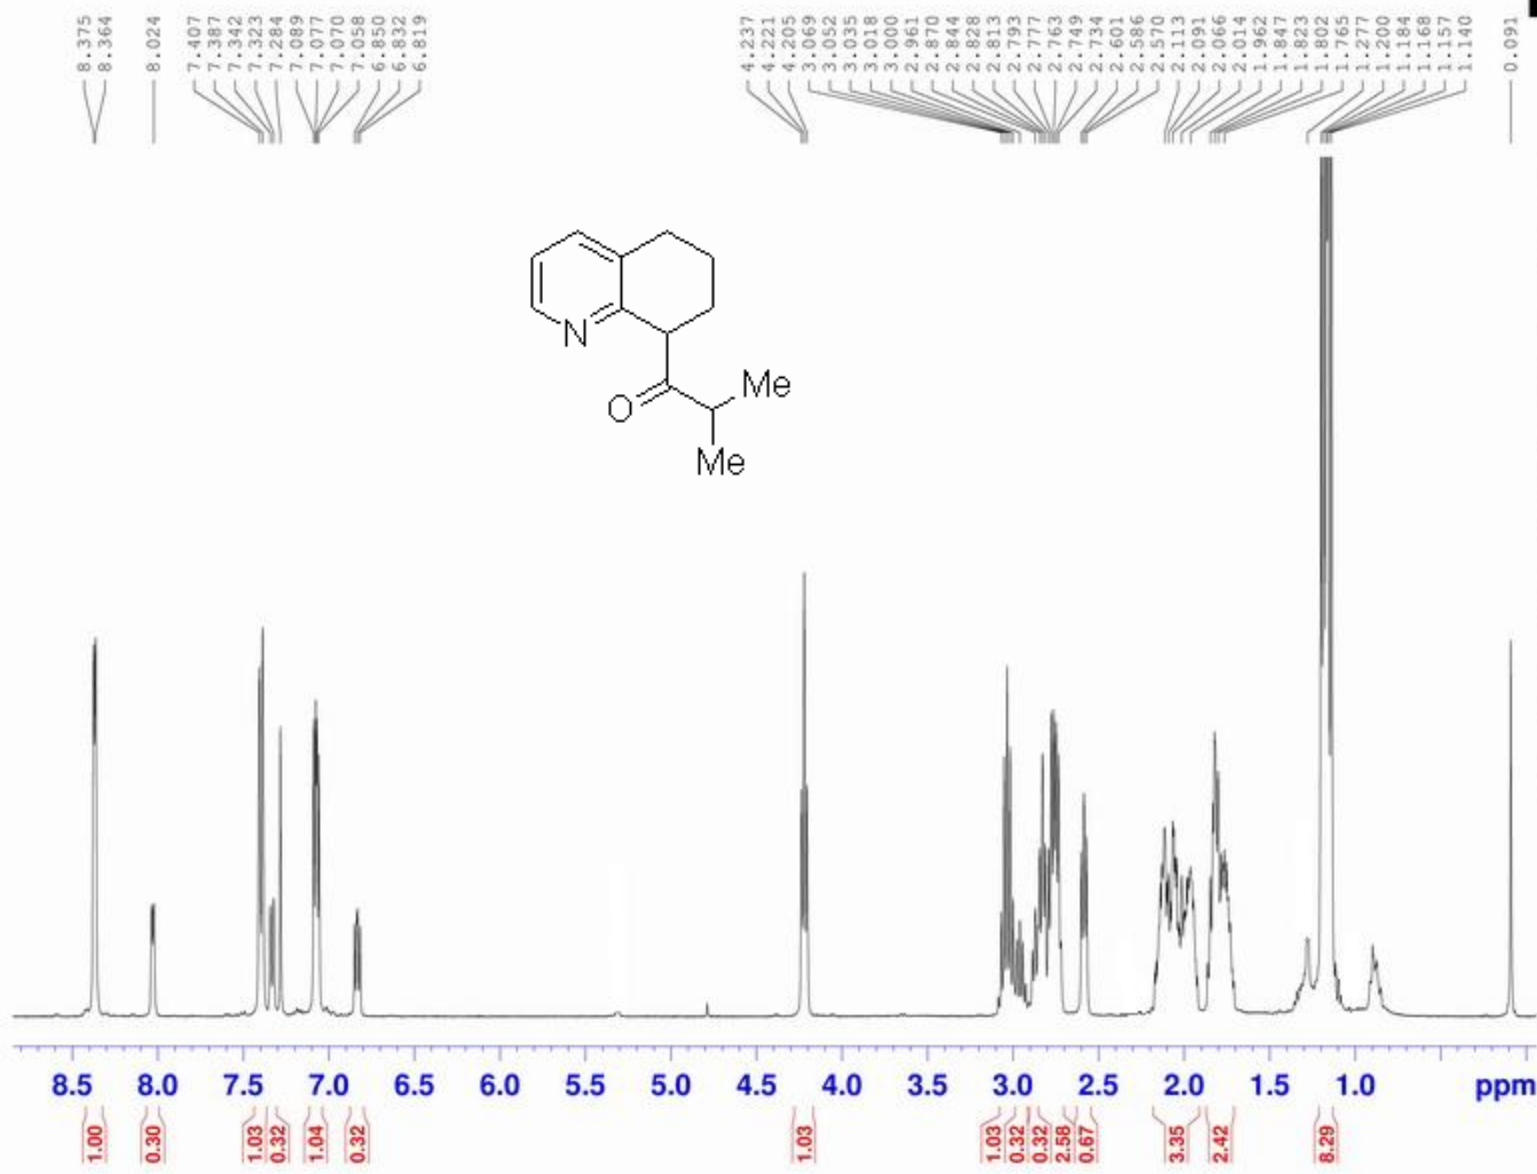



125253-1

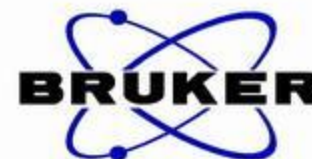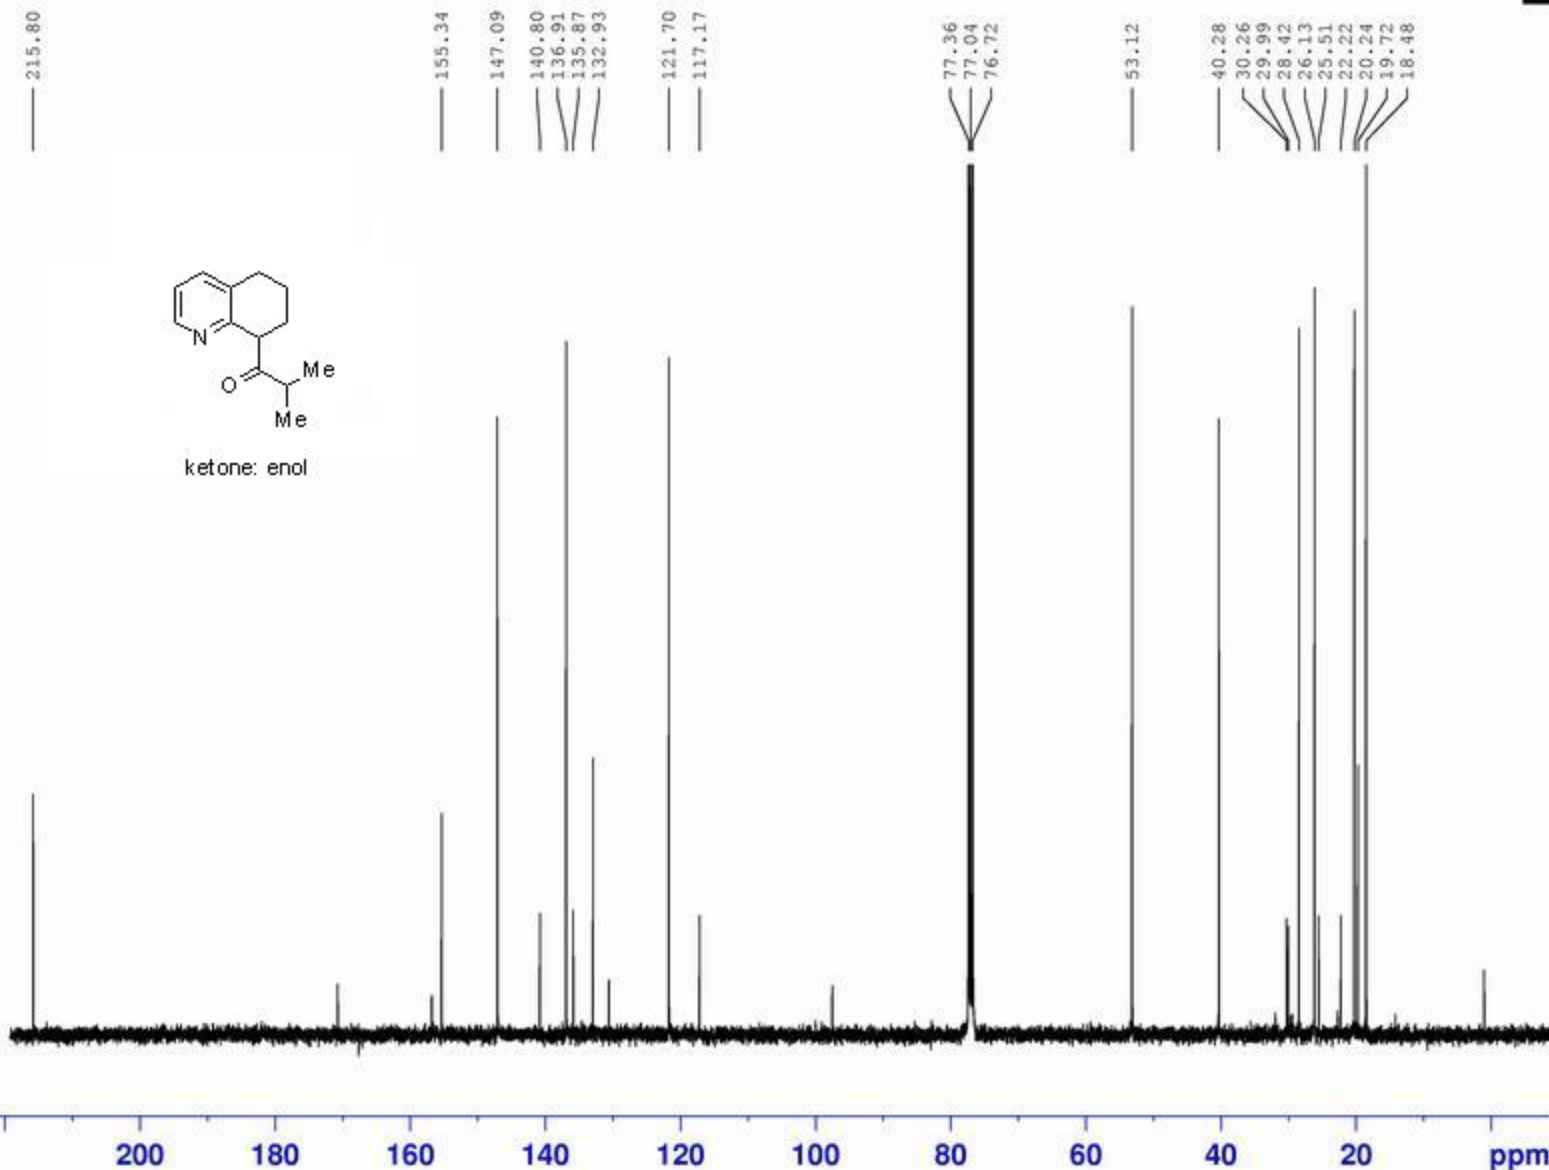

```

Current Data Parameters
NAME          wdp
EXPNO         255
PROCNO        1

F2 - Acquisition Parameters
Date_         20080721
Time          23.08
INSTRUM       spect
PROBHD        5 mm PABBO BB-
PULPROG       zgpg30
TD            65536
SOLVENT       CDCl3
NS            1786
DS            4
SWH           23980.814 Hz
FIDRES        0.365918 Hz
AQ            1.3664756 sec
RG            1149.4
DW            20.850 usec
DE            6.00 usec
TE            297.0 K
D1            2.0000000 sec
d11           0.0300000 sec
DELTA         1.89999998 sec
TD0           1

----- CHANNEL f1 -----
NUC1          13C
P1            12.20 usec
PL1           1.00 dB
SFO1          100.6228298 MHz

----- CHANNEL f2 -----
CPOPRG2       waltz16
NUC2          1H
PCPD2         80.00 usec
PL2           0.00 dB
PL12          15.39 dB
PL13          15.50 dB
SFO2          400.1316005 MHz

F2 - Processing parameters
SI            32768
SF            100.6127690 MHz
MDW          EM
SSB           0
LB            1.00 Hz
GB            0
PC            1.40
    
```

125258

16.467

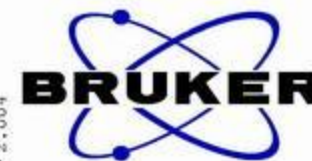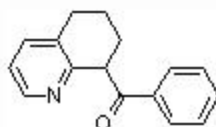

ketone: enol

8.383  
8.373  
8.200  
8.189  
8.091  
8.071  
7.601  
7.585  
7.567  
7.515  
7.496  
7.477  
7.466  
7.445  
7.425  
7.405  
7.380  
7.363  
7.345  
7.283  
7.117  
7.105  
7.098  
7.086  
6.988  
6.975  
6.970  
6.957  
5.048  
5.033  
5.017  
2.968  
2.953  
2.937  
2.926  
2.911  
2.896  
2.854  
2.833  
2.816  
2.800  
2.780  
2.660  
2.645  
2.630  
2.255  
2.225  
2.217  
2.209  
2.037  
2.015  
2.004

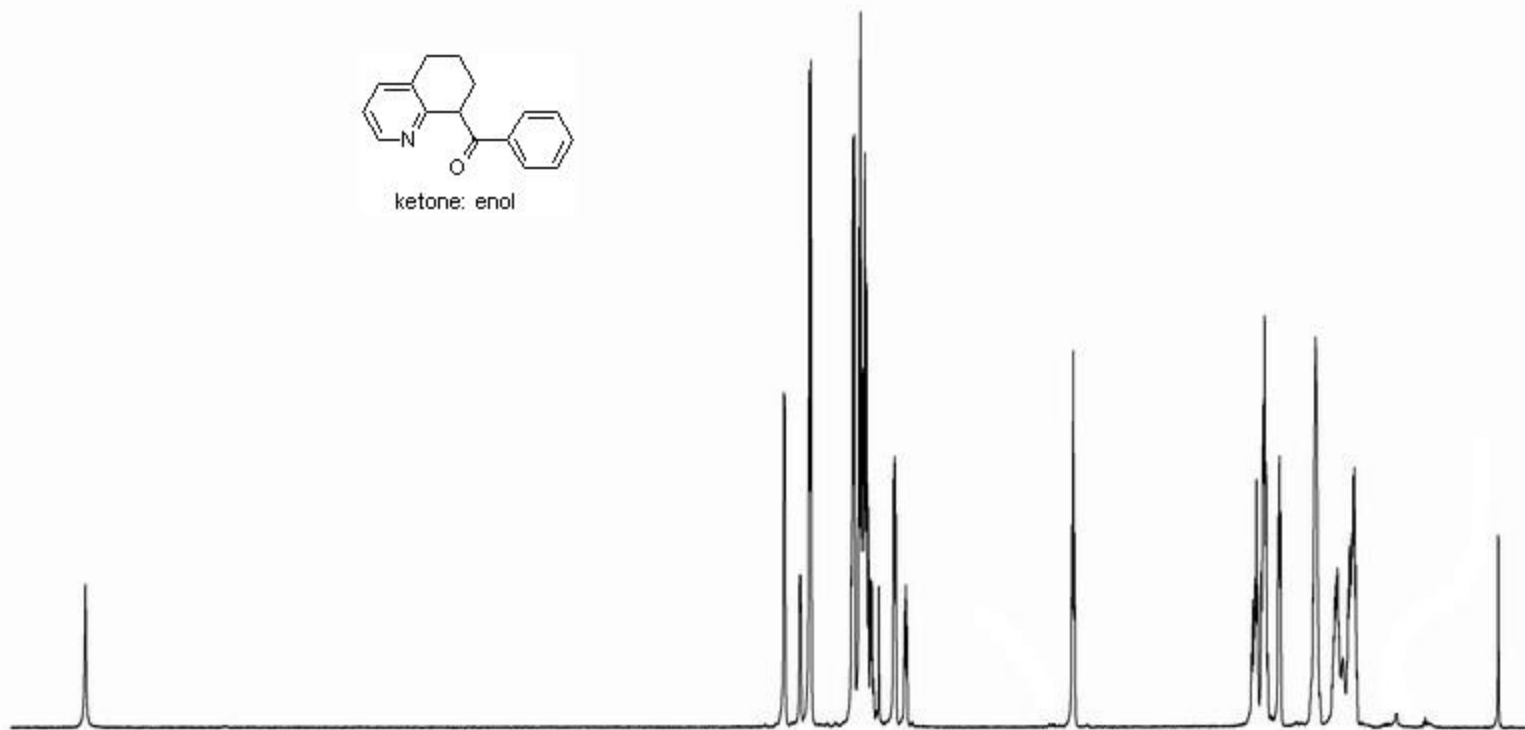

17 16 15 14 13 12 11 10 9 8 7 6 5 4 3 2 1 ppm

0.42  
1.00  
0.46  
2.05  
2.03  
4.52  
0.50  
1.01  
0.47  
1.02  
1.16  
2.05  
0.98  
2.14  
1.19  
2.11

Current Data Parameters  
 NAME wdp  
 EXPNO 263  
 PROCNO 1

F2 - Acquisition Parameters  
 Date\_ 20080725  
 Time 10.35  
 INSTRUM spect  
 PROBHD 5 mm PABBO BB-  
 PULPROG zg30  
 TD 65536  
 SOLVENT CDCl3  
 NS 2  
 DS 2  
 SWH 11990.407 Hz  
 FIDRES 0.182959 Hz  
 AQ 2.7329011 sec  
 RG 80.6  
 DW 41.700 usec  
 DE 6.00 usec  
 TE 302.6 K  
 D1 1.00000000 sec  
 TDO 1

----- CHANNEL f1 -----  
 NUC1 1H  
 P1 13.60 usec  
 PL1 0.00 dB  
 SFO1 400.1324710 MHz

F2 - Processing parameters  
 SI 32768  
 SF 400.1300000 MHz  
 MDW EM  
 SSB 0  
 LB 0.30 Hz  
 GB 0  
 PC 1.00

125258

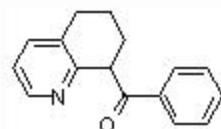

ketone: enol

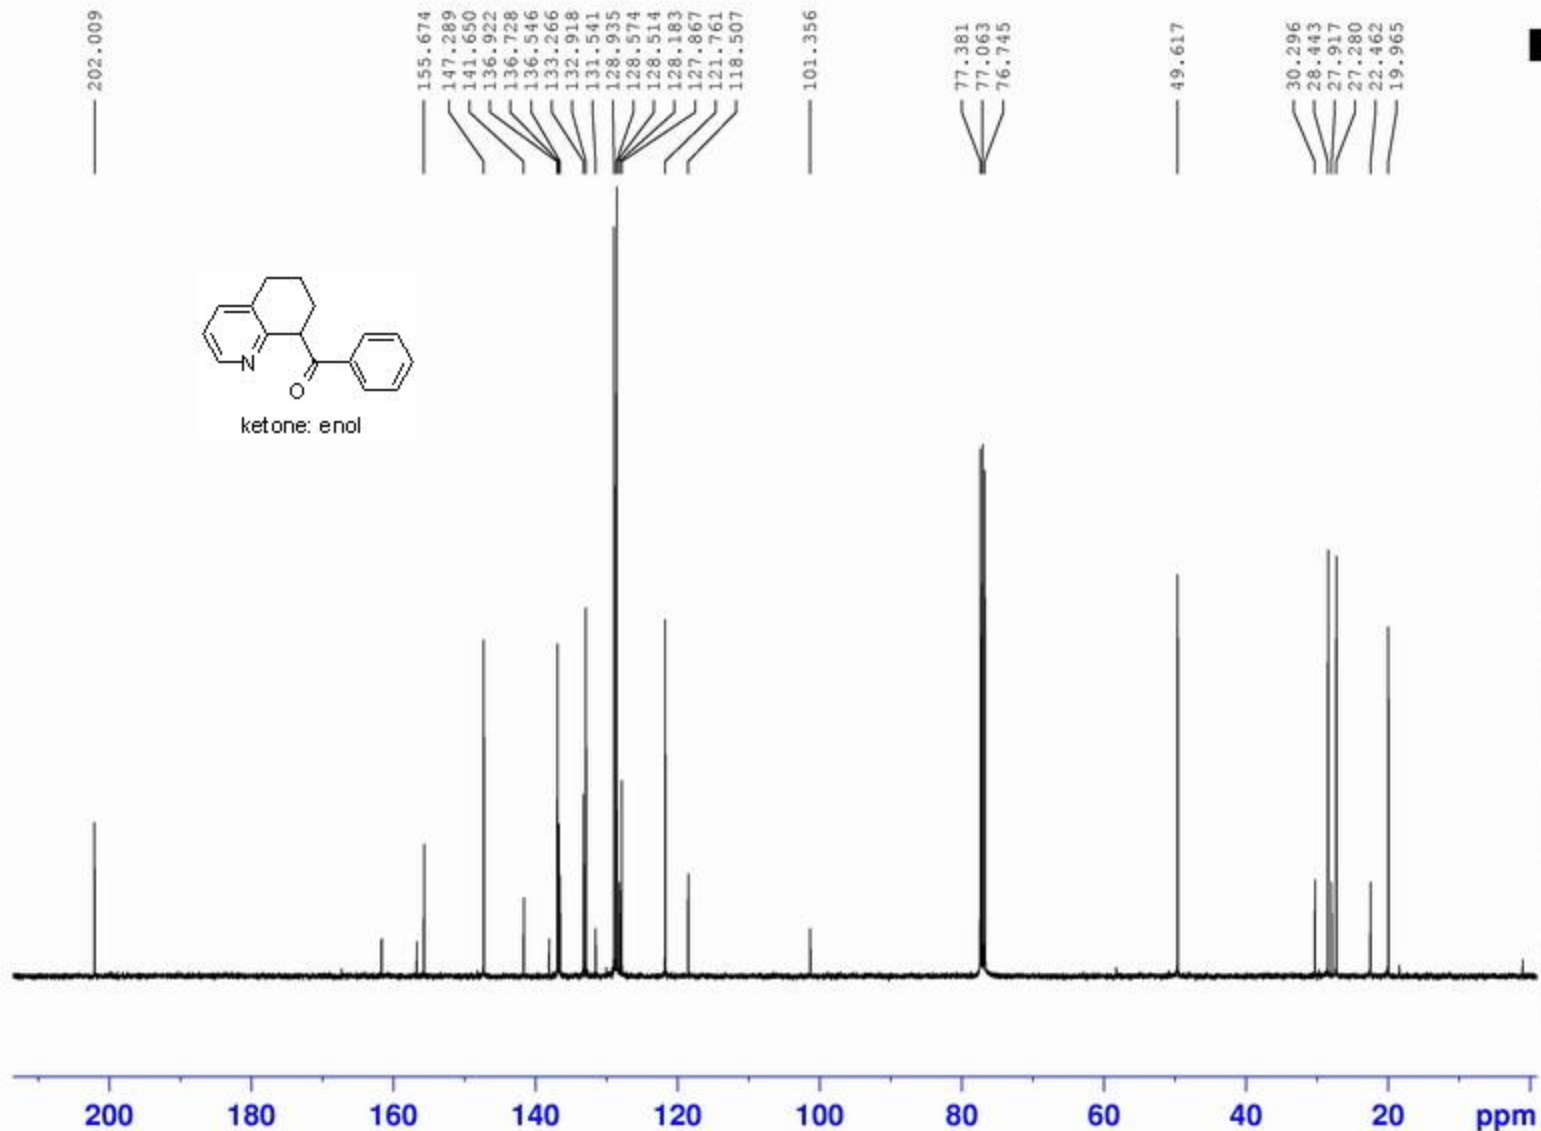

Current Data Parameters  
 NAME wdp  
 EXPNO 265  
 PROCNO 1

F2 - Acquisition Parameters  
 Date\_ 20080725  
 Time 17.19  
 INSTRUM spect  
 PROBHD 5 mm PABBO BB-  
 PULPROG zgpg30  
 TD 65536  
 SOLVENT CDCl3  
 NS 2048  
 DS 4  
 SWH 23980.814 Hz  
 FIDRES 0.365918 Hz  
 AQ 1.3664756 sec  
 RG 1290.2  
 DW 20.850 usec  
 DE 6.00 usec  
 TE 304.0 K  
 D1 2.00000000 sec  
 d11 0.03000000 sec  
 DELTA 1.89999998 sec  
 TDO 1

----- CHANNEL f1 -----  
 NUC1 13C  
 P1 12.20 usec  
 PL1 1.00 dB  
 SFO1 100.6228298 MHz

----- CHANNEL f2 -----  
 CPDPRG2 waltz16  
 NUC2 1H  
 PCPD2 80.00 usec  
 PL2 0.00 dB  
 PL12 15.39 dB  
 PL13 15.50 dB  
 SFO2 400.1316005 MHz

F2 - Processing parameters  
 SI 32768  
 SF 100.6127690 MHz  
 WDW EM  
 SSB 0  
 LB 1.00 Hz  
 CB 0  
 PC 1.40

### Experimental Procedure for optimization of the Catalytic Conditions.

TABLE I. Effects of the base and solvent on the coupling reaction between 4-methoxy iodobenzene and *n*-hexylamine<sup>a</sup>

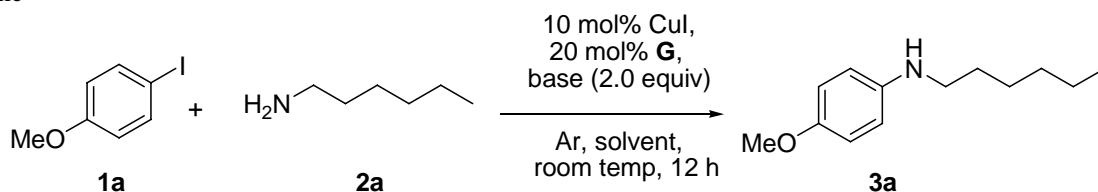

| Entry | Base                            | Solvent            | Yield (%) <sup>b</sup> |
|-------|---------------------------------|--------------------|------------------------|
| 1     | Cs <sub>2</sub> CO <sub>3</sub> | DMF                | 97                     |
| 2     | K <sub>2</sub> CO <sub>3</sub>  | DMF                | 31                     |
| 3     | K <sub>3</sub> PO <sub>4</sub>  | DMF                | 72                     |
| 4     | DABCO                           | DMF                | trace                  |
| 5     | Cs <sub>2</sub> CO <sub>3</sub> | DMSO               | 95                     |
| 6     | Cs <sub>2</sub> CO <sub>3</sub> | CH <sub>3</sub> CN | 47                     |
| 7     | Cs <sub>2</sub> CO <sub>3</sub> | toluene            | 19                     |
| 8     | Cs <sub>2</sub> CO <sub>3</sub> | DMF                | 63 <sup>c</sup>        |
| 9     | Cs <sub>2</sub> CO <sub>3</sub> | DMF                | 92 <sup>d</sup>        |

<sup>a</sup> **1a** (1.0 mmol), **2a** (1.5 mmol), 10 mol% CuI, 20 mol% **G**, base (2.0 mmol), solvent (0.5 mL), Ar, 25 °C, 12 h. <sup>b</sup> Isolated yield. <sup>c</sup> CuI (5 mol%), **G** (10 mol%). <sup>d</sup> **1a** (50 mmol), **2a** (75 mmol), 10 mol% CuI, 20 mol% **G**, Cs<sub>2</sub>CO<sub>3</sub> (100 mmol), DMF (25 mL), Ar, 25 °C, 12 h.

### General Procedure A for Room-Temperature Amination of Aryl Iodides and Heteroaryl Iodides (1.0 mmol scale).

An oven-dried Schlenk tube equipped with a Teflon valve was charged with a magnetic stir bar, CuI (19 mg, 0.10 mmol, 10 mol %), Cs<sub>2</sub>CO<sub>3</sub> (650 mg, 2 mmol) and any remaining solids (amine and/or aryl halide). The tube was evacuated and backfilled with argon (this procedure was repeated three times). Under a counter flow of argon, 1.5 mmol amine (if liquid), 1 mmol aryl halide (if liquid), DMF (0.5 mL) and ligand **G** (35 mg, 0.2 mmol, 20 mol%) were added by syringe. The tube was evacuated and backfilled with argon again (this procedure was repeated three times) and sealed. The reaction mixture was allowed to stir under argon at ambient temperature (25 °C) for the required time period. Upon completion of the reaction, the mixture was diluted with ethyl acetate (10 ml), passed through a fritted glass filter to remove the inorganic salts and the solvent was removed under vacuum. The residue was purified by column chromatography on silica gel and the product was dried under high vacuum for at least 1 h.

### General Procedure B for Coupling of Aryl Bromides with Amines (1.0 mmol scale).

An oven-dried Schlenk tube equipped with a Teflon valve was charged with a magnetic stir bar, CuI (19 mg, 0.10 mmol, 10 mol %), Cs<sub>2</sub>CO<sub>3</sub> (650 mg, 2 mmol) and any remaining solids (amine and/or aryl halide). The tube was evacuated and backfilled with argon (this procedure was repeated three times). Under a counter flow of argon, 1.5 mmol amine (if liquid), 1 mmol aryl halide (if liquid), DMF (0.5 mL) and ligand **G** (35 mg, 0.2 mmol, 20 mol%) were added by syringe. The tube was evacuated and backfilled with argon again (this procedure was repeated three times) and sealed. The reaction mixture heated to the indicated temperature (60-100 °C) for the required time period. After cooling to room temperature, the mixture was diluted with ethyl acetate (10 ml) and filtered through a plug of celite<sup>®</sup> to remove the inorganic salts, the solvent was removed under vacuum. The residue was purified by column chromatography on silica gel and the product was dried under high vacuum for at least 1 h.

### General Procedure C for Coupling of Aryl aryl halide with Amino Acids (1.0 mmol scale).

The reaction procedure is similar to the general procedure **A** or **B** except use of 3 mmol Cs<sub>2</sub>CO<sub>3</sub>. After completion of the reaction, 5% NaOH aqueous (10 ml) and Et<sub>2</sub>O (10 ml) were added to the solution. The resulting solution was partitioned into two phases, the aqueous layer was separated, and the organic fraction was extracted with 5% NaOH aqueous (3 × 5 ml). The combined aqueous phase was neutralized to pH=4 with 20% HCl, the precipitation was filtered and dried by high vacuum at least 24 hours affording the desired products.

### Room Temperature Amination of Aryl Iodides: Table 2.

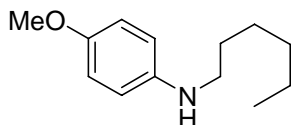

**N-n-hexyl-4-methoxybenzenamine (3a)**. Following Procedure A, 1-iodo-4-methoxybenzene (234 mg, 1.0 mmol) was allowed to react with *n*-hexylamine (152 mg, 1.5 mmol) for 12 h. The crude brown oil was purified by flash chromatography on silica gel eluent (15:1 petroleum ether: ethyl acetate) to provide 97 % yield of the desired product as a pale-yellow oil. <sup>1</sup>H NMR(CDCl<sub>3</sub>): δ=6.82 (d, *J*=8.8 Hz, 2 H; Phenyl), 6.62 (d, *J*=8.8 Hz, 2 H; Phenyl), 3.79 (s, 3 H; OCH<sub>3</sub>), 3.34 (s, 1 H; NH), 3.08 (t, *J*=7.2 Hz, 2 H; -N-CH<sub>2</sub>-), 1.63 (m, 2 H; CH<sub>2</sub>), 1.47-1.35 (m, 6 H; CH<sub>2</sub>), 0.94 ppm (t, *J*=6.8 Hz, 3 H; CH<sub>3</sub>); <sup>13</sup>C NMR(CDCl<sub>3</sub>): δ=152.1, 142.8, 114.9, 114.1 (Phenyl), 55.8 (-N-CH-), 45.1, 31.7, 29.7, 26.9, 22.7 (CH<sub>2</sub>), 14.1 ppm (CH<sub>3</sub>); GC/MS: rt = 8.11 min, M/Z = 207.

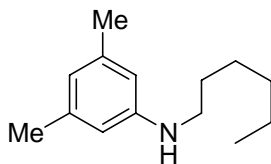

**N-n-hexyl-3,5-dimethylbenzenamine (3b)**. Following Procedure A, 1-iodo-3,5-dimethylbenzene (232 mg, 1.0 mmol) was allowed to react with *n*-hexylamine (152 mg, 1.5 mmol) for 12 h. The crude brown oil was purified by flash chromatography on silica gel eluent (25:1 petroleum ether: ethyl acetate) to provide 97 % yield of the desired product as a pale-yellow oil. <sup>1</sup>H NMR(CDCl<sub>3</sub>): δ=6.5 (s, 1 H; Phenyl), 6.38 (s, 2 H; Phenyl), 3.56 (s, 1 H; NH), 3.19 (t, *J*=7.2, 2 H; -N-CH<sub>2</sub>), 2.39 (s, 6 H; CH<sub>3</sub>), 1.77-1.69 (m, 2H; CH<sub>2</sub>), 1.57-1.43 (m, 6 H; CH<sub>2</sub>), 1.04 ppm (t, *J*=6.8 Hz, 3 H; CH<sub>3</sub>); <sup>13</sup>C NMR(CDCl<sub>3</sub>): δ=148.8, 138.9, 119.3, 110.9 (Phenyl), 44.2 (-N-CH<sub>2</sub>-), 31.8 (Aryl-CH<sub>3</sub>), 29.8, 27.0, 22.8, 21.6 (CH<sub>2</sub>), 14.2 ppm (CH<sub>3</sub>); GC/MS: rt = 7.82 min, M/Z = 205.

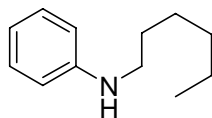

**N-n-hexylbenzenamine (3c)**. Following Procedure A, iodobenzene (204 mg, 1.0 mmol) was allowed to react with *n*-hexylamine (152 mg, 1.5 mmol) for 10 h. The crude brown oil was purified by flash chromatography on silica gel eluent (25:1 petroleum ether: ethyl acetate) to provide 97 % yield of the desired product as a pale-yellow oil. <sup>1</sup>H NMR(CDCl<sub>3</sub>): δ=7.21-7.17 (m, 2 H; Phenyl), 6.69 (t, *J*=7.6 Hz, 1 H; Phenyl), 6.63 (d, *J*=7.6 Hz, 2 H; Phenyl), 3.73 (s, 1 H; NH), 3.10 (t, *J*=7.2, 2 H; -N-CH<sub>2</sub>-), 1.67-1.60 (m, 2H; CH<sub>2</sub>), 1.46-1.29 (m, 6 H; CH<sub>2</sub>), 0.91 ppm (t, *J*=6.8 Hz, 3 H; CH<sub>3</sub>); <sup>13</sup>C NMR(CDCl<sub>3</sub>): δ=148.3, 129.2, 117.3, 112.9 (Phenyl), 44.2 (-NH-CH<sub>2</sub>), 31.7, 29.5, 26.9, 22.7 (CH<sub>2</sub>), 14.1 ppm (CH<sub>3</sub>); GC/MS: rt = 7.06 min, M/Z = 177.

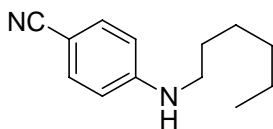

**N-*n*-hexyl-4-benzonitrile (3d).** Following Procedure A, 4-iodobenzonitrile (229 mg, 1.0 mmol) was allowed to react with *n*-hexylamine (152 mg, 1.5 mmol) for 10 h. The crude oil was purified by flash chromatography on silica gel eluent (20:1 petroleum ether: ethyl acetate) to provide 95 % yield of the desired product as a pale yellow oil.  $^1\text{H}$  NMR( $\text{CDCl}_3$ ):  $\delta$ =7.39 (d,  $J$ =8.8 Hz, 2 H; Phenyl), 6.55 (d,  $J$ =8.4 Hz, 2 H; Phenyl), 4.51 (s, 1 H; NH), 3.11 (t,  $J$ =8.8 Hz, 2 H; -N- $\text{CH}_2$ -), 1.66-1.59 (m, 2 H;  $\text{CH}_2$ ), 1.43-1.25 (m, 6 H;  $\text{CH}_2$ ), 0.88 ppm (t,  $J$ =6.8 Hz, 3 H;  $\text{CH}_3$ );  $^{13}\text{C}$  NMR( $\text{CDCl}_3$ ) :  $\delta$ =151.3, 133.7, 120.5, 112.3 (Phenyl), 98.5 (CN), 43.5 (-N- $\text{CH}_2$ ), 31.5, 29.1, 26.7, 22.6 ( $\text{CH}_2$ ), 14.0 ppm ( $\text{CH}_3$ ); GC/MS: rt = 9.02 min, M/Z = 202.

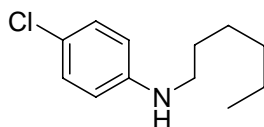

**N-*n*-hexyl-4-chloroaniline (3e).** Following Procedure A, 1-chloro-4-iodobenzene (238 mg, 1.0 mmol) was allowed to react with *n*-hexylamine (152 mg, 1.5 mmol) for 12 h. The crude oil was purified by flash chromatography on silica gel eluent (20:1 petroleum ether: ethyl acetate) to provide 91 % yield of the desired product as a pale purple oil.  $^1\text{H}$  NMR( $\text{CDCl}_3$ ):  $\delta$ =7.11 (dd,  $J$ =6.8, 2.4 Hz, 2 H; Phenyl), 6.51 (dd,  $J$ =6.8, 2.0 Hz, 2 H; Phenyl), 3.59 (s, 1 H; NH), 3.06 (t,  $J$ =7.2 Hz, 2 H; -N- $\text{CH}_2$ -), 1.65-1.58 (m, 2 H;  $\text{CH}_2$ ), 1.45-1.30 (m, 6 H;  $\text{CH}_2$ ), 0.92 ppm (t,  $J$ =7.2 Hz, 3 H;  $\text{CH}_3$ );  $^{13}\text{C}$  NMR( $\text{CDCl}_3$ ) :  $\delta$ =147.1, 129.0, 121.6, 113.8 (Phenyl), 44.2 (-N- $\text{CH}_2$ ), 31.7, 29.4, 26.8, 22.7 ( $\text{CH}_2$ ), 14.1 ppm ( $\text{CH}_3$ ); GC/MS: rt = 8.07 min, M/Z = 257.

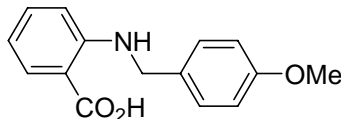

**2-(4-methoxybenzylamino)benzoic acid (3f).** Following Procedure A, 2-iodobenzoic acid (248 mg, 1.0 mmol) was allowed to react with 4-methoxybenzylamine (206 mg, 1.5 mmol) for 10 h. The crude oil was purified by flash chromatography on silica gel eluent (20:1 petroleum ether: ethyl acetate) to provide 92 % yield of the desired product as a white solid.  $^1\text{H}$  NMR( $\text{CDCl}_3$ ):  $\delta$ =7.79 (d,  $J$ =7.6 Hz, 1 H; Phenyl), 7.33-7.27 (m, 3 H; Phenyl), 6.90 (d,  $J$ =8.4 Hz, 2 H; Phenyl), 6.69 (d,  $J$ =8.4, 1 H; Phenyl), 6.54 (t,  $J$ =7.2, 1 H; Phenyl), 4.36 (s, 2 H;  $\text{CH}_2$ ), 3.73 ppm (s, 3 H; - $\text{OCH}_3$ );  $^{13}\text{C}$  NMR( $\text{CDCl}_3$ ) :  $\delta$ =158.8, 151.1, 134.8, 132.1, 131.5, 128.9, 114.9, 114.4, 112.1, 111.5, 55.5, 45.9 ppm; MS (APCI): m/z: 258 [M-];

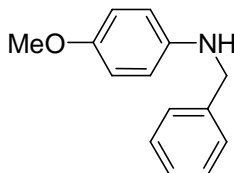

**N-benzyl-4-methoxybenzylamine (3g).** Following Procedure A, 1-iodo-4-methoxybenzene (234 mg, 1.0 mmol) was allowed to react with benzylamine (161 mg, 1.5 mmol) for 13 h. The crude oil was purified by flash chromatography on silica gel eluent (20:1 petroleum ether: ethyl acetate) to provide 91 % yield of the desired product as a white solid.  $^1\text{H}$  NMR( $\text{CDCl}_3$ ):  $\delta$ =7.43-7.33 (m, 5 H; Phenyl), 6.84 (d,  $J$ =8.8 Hz, 2 H; Phenyl), 6.65 (d,  $J$ =8.8 Hz, 2 H; Phenyl), 4.33 (s, 2 H;  $\text{CH}_2$ ), 3.79 ppm (s, 3 H; - $\text{OCH}_3$ );  $^{13}\text{C}$  NMR( $\text{CDCl}_3$ ) :  $\delta$ =152.3, 142.5, 139.8, 128.7, 127.7, 127.3, 115.0, 114.3 (Phenyl), 55.7 ( $\text{CH}_2$ ), 49.3 ppm ( $\text{CH}_3$ ); GC/MS: rt = 8.92 min, M/Z = 213.

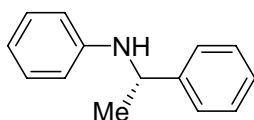

**(S)-N-Phenyl- $\alpha$ -methylbenzylamine (3h)**<sup>4</sup>. Following Procedure A, iodobenzene (204 mg, 1.0 mmol) was allowed to react with (S)-1-phenylethylamine (181 mg, 1.5 mmol) for 15 h. The crude oil was purified by flash chromatography on silica gel eluent (20:1 petroleum ether: ethyl acetate) to provide 85 % yield of the desired product as a pale yellow oil. <sup>1</sup>H NMR(CDCl<sub>3</sub>):  $\delta$ =7.49-7.41 (m, 4 H; Phenyl), 7.32 (t,  $J$ =7.2 Hz, 1 H; Phenyl), 7.19 (t,  $J$ =8.0 Hz, 2 H; Phenyl) 6.76 (t,  $J$ =7.6 Hz, 1 H; Phenyl), 6.63 (d,  $J$ =8.0 Hz, 2 H; Phenyl), 4.58 (m, 1 H; CH), 4.19 (s, 1 H; NH), 1.62 ppm (d,  $J$ =6.8 Hz, 3 H; CH<sub>3</sub>); <sup>13</sup>C NMR(CDCl<sub>3</sub>) :  $\delta$ =147.3, 145.3, 129.2, 128.8, 126.9, 126.9, 117.4, 113.5 (Phenyl), 53.6 (CH), 25.1 ppm (CH<sub>3</sub>);  $[\alpha]_D^{18}$  = +16.9° (c 1.0, methanol), literature: +16.9°; GC/MS: rt = 7.85 min, M/Z = 197.

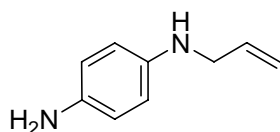

**N-Allyl-*p*-phenylenediamine (3k)**. Following Procedure A, 4-iodobenzylamine (219 mg, 1.0 mmol) was allowed to react with allylamine (115 mg, 2 mmol) for 16 h. The crude oil was purified by flash chromatography on silica gel eluent (10:1 petroleum ether: ethyl acetate) to provide 80 % yield of the desired product as a brown oil. <sup>1</sup>H NMR(CDCl<sub>3</sub>):  $\delta$ =6.66-6.55 (m, 4 H; Phenyl), 6.01-5.92 (m, 1 H; -CH<sub>2</sub>-CH=), 5.24 (m, 1 H; -CH=CHH), 5.13 (m, 1 H; -CH=CHH), 3.72 (br s, 2 H; CH<sub>2</sub>), 4.58 ppm (br s, 3 H; NH and NH<sub>2</sub>); <sup>13</sup>C NMR(CDCl<sub>3</sub>) :  $\delta$ =140.9, 137.9, 135.8, 116.9 (Phenyl), 116.3 (-CH=), 115.1 (=CH<sub>2</sub>), 47.9 ppm (-CH<sub>2</sub>-); GC/MS: rt = 6.93 min, M/Z = 148.

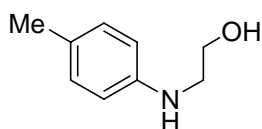

**2-*p*-Tolylaminoethanol (3i)**. Following Procedure A, 1-iodo-4-methylbenzene (218 mg, 1.0 mmol) was allowed to react with 2-aminoethanol (92 mg, 1.5 mmol) for 8 h. The crude oil was purified by flash chromatography on silica gel eluent (5:1 petroleum ether: ethyl acetate) to provide 98 % yield of the desired product as a pale yellow oil. <sup>1</sup>H NMR(CDCl<sub>3</sub>):  $\delta$ =7.03 (d,  $J$ =8.0 Hz, 2 H; Phenyl), 6.60 (d,  $J$ =8.4 Hz, 2 H; Phenyl), 3.78 (t,  $J$ =5.2 Hz, 2 H; -O-CH<sub>2</sub>-), 3.43 (br s, 2 H; NH and OH), 3.24 (t,  $J$ =5.2 Hz, 2 H; -N-CH<sub>2</sub>), 2.30 ppm (s, 3 H; CH<sub>3</sub>); <sup>13</sup>C NMR(CDCl<sub>3</sub>) :  $\delta$ =145.8, 129.8, 127.3, 113.7 (Phenyl), 61.1 (-O-CH<sub>2</sub>-), 46.7 (-N-CH<sub>2</sub>-), 20.4 ppm (CH<sub>3</sub>); GC/MS: rt = 6.82 min, M/Z = 151.

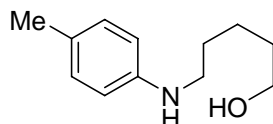

**5-[(4-methylphenyl)amino]-1-Pentanol (3j)**. Following Procedure A, 1-iodo-4-methylbenzene (218 mg, 1.0 mmol) was allowed to react with 5-aminopentanol (155 mg, 1.5 mmol) for 12 h. The crude oil was purified by flash chromatography on silica gel eluent (5:1 petroleum ether: ethyl acetate) to provide 93 % yield of the desired product as a yellow oil. <sup>1</sup>H NMR(CDCl<sub>3</sub>):  $\delta$ =7.01 (d,  $J$ =8.0 Hz, 2 H; Phenyl), 6.56 (d,  $J$ =8.0 Hz, 2 H; Phenyl), 3.61 (t,  $J$ =6.8 Hz, 2 H; -O-CH<sub>2</sub>-), 3.09 (t,  $J$ =6.8 Hz, 2 H; -N-CH<sub>2</sub>), 2.92 (br s, 2 H; NH and OH), 2.27 (s, 3 H; CH<sub>3</sub>), 1.68-1.57 (m, 4 H; CH<sub>2</sub>), 1.51-1.45 ppm (m, 2 H; CH<sub>2</sub>); <sup>13</sup>C NMR(CDCl<sub>3</sub>) :  $\delta$ =146.2, 129.8, 126.6, 113.2 (Phenyl), 62.6 (-O-CH<sub>2</sub>-), 44.4 (-N-CH<sub>2</sub>-), 32.5 (CH<sub>3</sub>), 29.4, 23.4, 20.4 ppm (CH<sub>2</sub>); GC/MS: rt = 8.31 min, M/Z = 193.

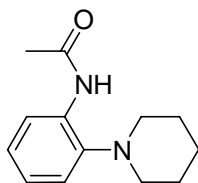

**N-[2-(1-piperidinyl)phenyl]acetamide (3o).** Following Procedure A, N-(2-iodophenyl)acetamide (261 mg, 1.0 mmol) was allowed to react with piperidine (128 mg, 1.5 mmol) for 15 h. The crude oil was purified by flash chromatography on silica gel eluent (8:1 petroleum ether: ethyl acetate) to provide 83 % yield of the desired product as a pale yellow oil.  $^1\text{H}$  NMR( $\text{CDCl}_3$ ):  $\delta$ =8.54 (br s, 1 H; NH), 8.33 (d,  $J$ =7.6 Hz, 1 H; Phenyl), 7.14-7.02 (m, 3 H; Phenyl), 2.79 (br s, 4 H; -N-CH<sub>2</sub>-), 2.21 (s, 3 H; CH<sub>3</sub>), 1.74 (br s, 4 H; CH<sub>2</sub>), 1.62 ppm (br s, 2 H; CH<sub>2</sub>);  $^{13}\text{C}$  NMR( $\text{CDCl}_3$ ):  $\delta$ =168.0 (-C=O), 142.4, 133.5, 124.9, 123.5, 120.3, 119.3 (Phenyl), 53.7 (-N-CH<sub>2</sub>-), 26.9, 24.9, 24.0 ppm (CH<sub>2</sub>); GC/MS: rt = 8.67 min, M/Z = 218.

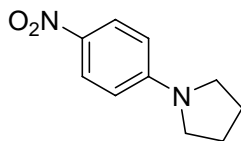

**4-pyrrolidinonitrobenzene (3m).** Following Procedure A, 1-iodo-4-nitrobenzene (249 mg, 1.0 mmol) was allowed to react with pyrrolidine (107 mg, 1.5 mmol) for 24 h. The crude oil was purified by flash chromatography on silica gel eluent (8:1 petroleum ether: ethyl acetate) to provide 95 % yield of the desired product as a yellow solid.  $^1\text{H}$  NMR( $d$ -DMSO):  $\delta$ =8.02 (d,  $J$ =9.6 Hz, 2 H; Phenyl), 6.56 (d,  $J$ =9.2 Hz, 2 H; Phenyl), 3.34 (t,  $J$ =5.6 Hz, 4 H; -N-CH<sub>2</sub>-), 1.96 ppm (t,  $J$ =6.8 Hz, 4 H; CH<sub>2</sub>);  $^{13}\text{C}$  NMR( $d$ -DMSO):  $\delta$ =152.3, 135.7, 126.4, 111.3 (Phenyl), 48.2 (-N-CH<sub>2</sub>-), 25.4 ppm (CH<sub>2</sub>); GC/MS: rt = 9.56 min, M/Z = 192.

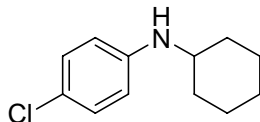

**N-cyclohexyl-4-chlorobenzenamine (3l).** Following Procedure A, 1-chloro-4-iodobenzene (238 mg, 1.0 mmol) was allowed to react with cyclohexanamine (149 mg, 1.5 mmol) for 19 h. The crude oil was purified by flash chromatography on silica gel eluent (15:1 petroleum ether: ethyl acetate) to provide 86 % yield of the desired product as a white solid.  $^1\text{H}$  NMR( $\text{CDCl}_3$ ):  $\delta$ =7.28-7.10 (m, 2 H; Phenyl), 6.53 (m, 2 H; Phenyl), 3.61 (br s, 1 H; NH), 3.27-3.19 (m, 1 H; -N-CH-), 2.08-2.05 (m, 2 H; CH<sub>2</sub>), 1.82-1.77 (m, 2 H; CH<sub>2</sub>), 1.71-1.66 (m, 1 H; CH<sub>2</sub>), 1.45-1.24 ppm (m, 5 H; CH<sub>2</sub>);  $^{13}\text{C}$  NMR( $\text{CDCl}_3$ ):  $\delta$ =145.9, 129.1, 121.4, 114.3 (Phenyl), 51.9 (-N-CH-), 33.3, 25.9, 24.9 ppm (CH<sub>2</sub>); GC/MS: rt = 8.31 min, M/Z = 209.

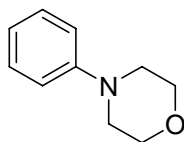

**(4-morpholinyl)benzene (3n).** Following Procedure A, iodobenzene (204 mg, 1.0 mmol) was allowed to react with morpholine (131 mg, 1.5 mmol) for 24 h. The crude oil was purified by flash chromatography on silica gel eluent (10:1 petroleum ether: ethyl acetate) to provide 90 % yield of the desired product as a white solid.  $^1\text{H}$  NMR( $\text{CDCl}_3$ ):  $\delta$ =7.34-7.29 (m, 2 H; Phenyl), 6.97-6.91 (m, 3 H; Phenyl), 3.89 (t,  $J$ =4.8 Hz, 4 H; -O-CH<sub>2</sub>-), 3.18 ppm (t,  $J$ =4.8 Hz, 4 H; -N-CH<sub>2</sub>-);  $^{13}\text{C}$  NMR( $\text{CDCl}_3$ ):  $\delta$ =151.2, 129.2, 120.2, 115.8 (Phenyl), 66.9 (-O-CH<sub>2</sub>-), 49.5 ppm (-N-CH<sub>2</sub>-); GC/MS: rt = 6.59 min, M/Z = 163.



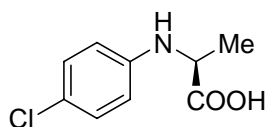

**(S)-2-(4-chlorophenylamino)propanoic acid<sup>5</sup> (3p)**. Following Procedure C, 1-chloro-4-iodobenzene (238 mg, 1.0 mmol) was allowed to react with (S)-2-aminopropanoic acid (134 mg, 1.5 mmol) for 11 h. yield: 89 %. the desired product was a gray solid. <sup>1</sup>H NMR(*d*-DMSO):  $\delta$ =7.08 (dd, *J*=6.8, 2.0 Hz, 2 H; Phenyl), 6.55 (dd, *J*=6.8, 2.0 Hz, 2 H; Phenyl), 3.92 (m, 1 H; CH), 1.36 ppm (d, *J*=7.2 Hz, 3 H; CH<sub>3</sub>); <sup>13</sup>C NMR(*d*-DMSO) :  $\delta$ =176.0 (COOH), 147.2, 128.9, 119.9, 114.2 (Phenyl), 51.5 (CH), 18.5 ppm (CH<sub>3</sub>); [ $\alpha$ ]<sub>D</sub><sup>18</sup> = -73.3° (c 0.33, MeOH), literature: -73.5°; MS (APCI): M/Z: 199 [M-].

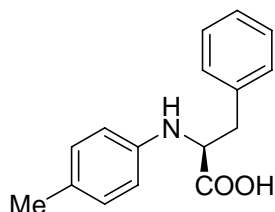

**(S)-2-(*p*-toluidino)-3-phenylpropanoic acid (3q)**. Following Procedure C, 1-iodo-4-methylbenzene (218 mg, 1.0 mmol) was allowed to react with (S)-2-amino-3-phenylpropanoic acid (248 mg, 1.5 mmol) for 12 h. yield: 85 %. the desired product was a gray solid. <sup>1</sup>H NMR(*d*-DMSO):  $\delta$ =7.29-7.20 (m, 5 H; Phenyl), 6.87 (d, *J*=7.6 Hz, 2 H; Phenyl), 6.49 (d, *J*=7.6 Hz, 2 H; Phenyl), 4.09 (br s, 1 H; NH), 3.35 (br s, 1 H; CH), 3.08-2.94 (m, 2 H; CH<sub>2</sub>), 2.13 ppm (s, 3 H; CH<sub>3</sub>); <sup>13</sup>C NMR(*d*-DMSO) :  $\delta$ =175.2 (COOH), 145.9, 138.4, 129.8, 129.6, 128.6, 126.8, 125.3, 113.2 (Phenyl), 58.2 (CH), 38.3 (CH<sub>2</sub>), 20.5 ppm (CH<sub>3</sub>); [ $\alpha$ ]<sub>D</sub><sup>18</sup> = +1.6° (c 0.20, acetone); MS (APCI): M/Z: 254 [M-].

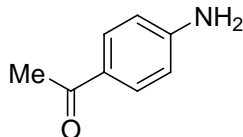

**1-(4-aminophenyl)ethanone (3r)**. Following Procedure A, a mixture of 4'-iodoacetophenone (246 mg, 1.0 mmol), CuI (20%), L7 (40%), NH<sub>4</sub>Cl (2 mmol), Cs<sub>2</sub>CO<sub>3</sub> (2 mmol), DMF (1 mL), H<sub>2</sub>O (50 uL) was stirred under Argon at room temperature for 20 h. The crude oil was purified by flash chromatography on silica gel eluent (1:2 petroleum ether: ethyl acetate) to provide 92 % yield of the desired product as a pale yellow solid. <sup>1</sup>H NMR(CDCl<sub>3</sub>):  $\delta$ =7.76 (d, *J*=8.4 Hz, 2 H; Phenyl), 6.60 (d, *J*=8.0 Hz, 2 H; Phenyl), 4.27 (s, 2 H; -NH<sub>2</sub>), 2.47 ppm (s, 3 H; -CH<sub>3</sub>); <sup>13</sup>C NMR(CDCl<sub>3</sub>) :  $\delta$ =196.7 (-C=O), 151.5, 130.8, 127.5, 113.7 (Phenyl), 26.1 ppm (-CH<sub>3</sub>); GC/MS: rt = 6.93 min, M/Z = 135.

wdp-53793

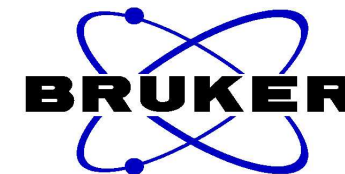

7.426  
7.403  
7.385  
7.350  
7.334  
6.857  
6.839  
6.835  
6.674  
6.652

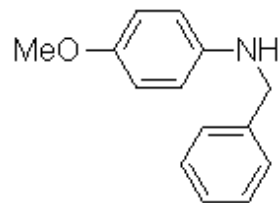

4.331  
3.791

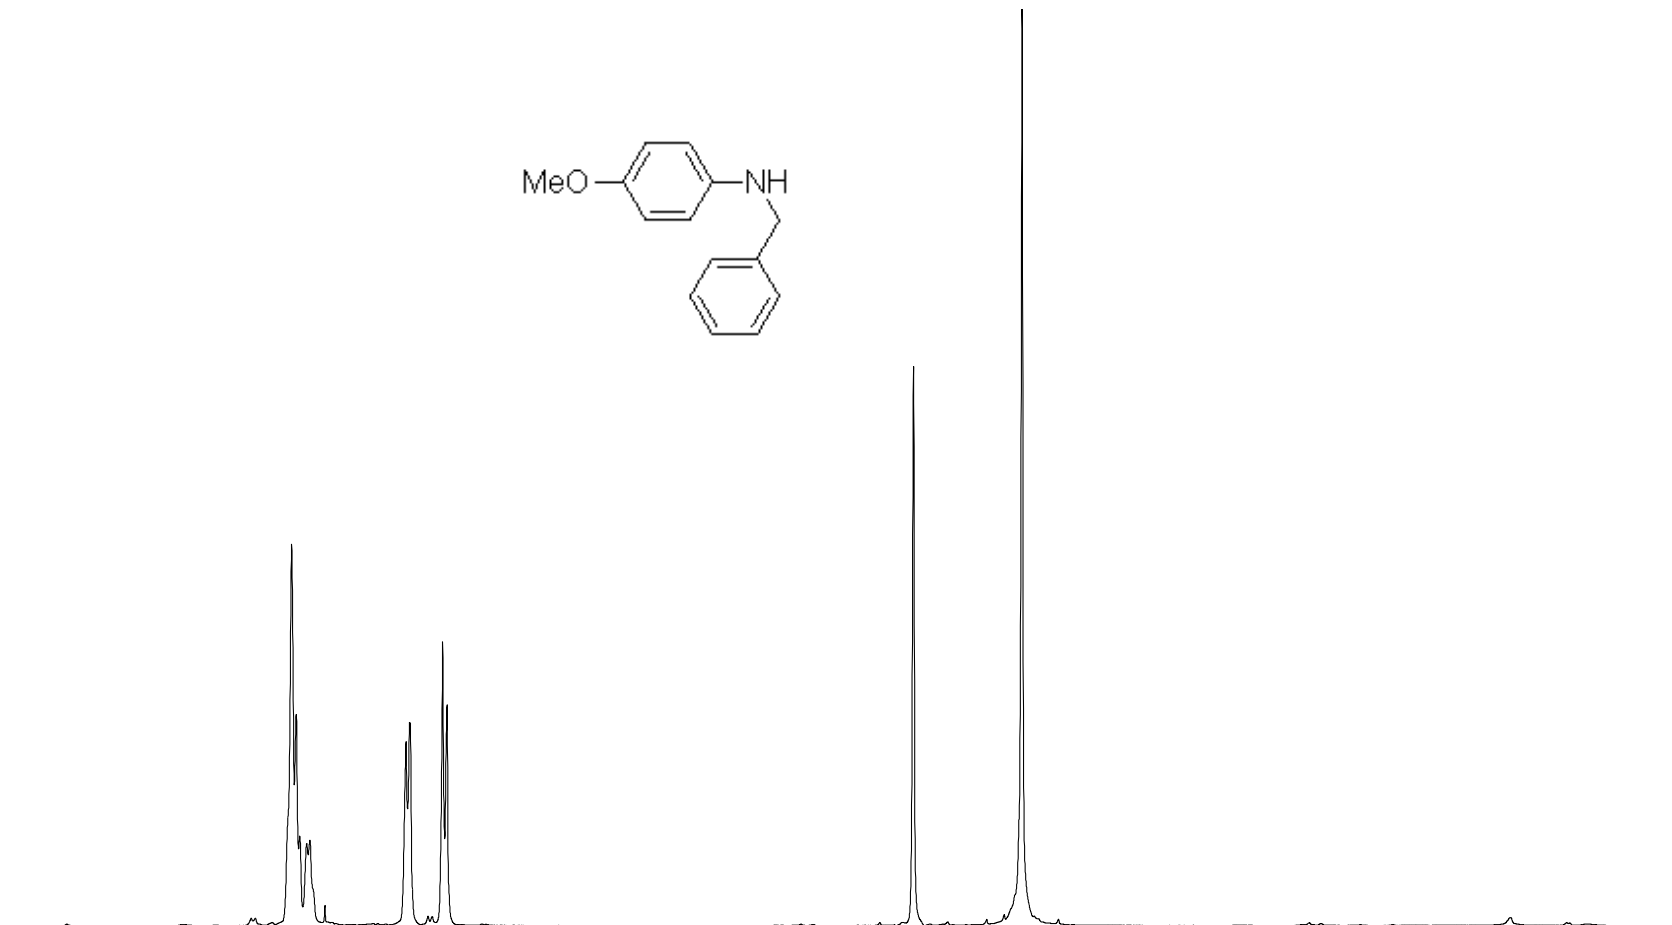

8.5 8.0 7.5 7.0 6.5 6.0 5.5 5.0 4.5 4.0 3.5 3.0 2.5 2.0 1.5 ppm

3.87  
1.02

1.99  
2.00

2.00

3.34

Current Data Parameters  
NAME wdp  
EXPNO 226  
PROCNO 1

F2 - Acquisition Parameters  
Date\_ 20080528  
Time 11.17  
INSTRUM spect  
PROBHD 5 mm PABBO BB-  
PULPROG zg30  
TD 65536  
SOLVENT CDCl3  
NS 2  
DS 2  
SWH 8278.146 Hz  
FIDRES 0.126314 Hz  
AQ 3.9584243 sec  
RG 35.9  
DW 60.400 usec  
DE 6.00 usec  
TE 299.0 K  
D1 1.00000000 sec  
TD0 1

==== CHANNEL f1 =====  
NUC1 1H  
P1 13.60 usec  
PL1 0.00 dB  
SFO1 400.1324710 MHz

F2 - Processing parameters  
SI 32768  
SF 400.1300089 MHz  
WDW EM  
SSB 0  
LB 0.30 Hz  
GB 0  
PC 1.00

wdp-53793

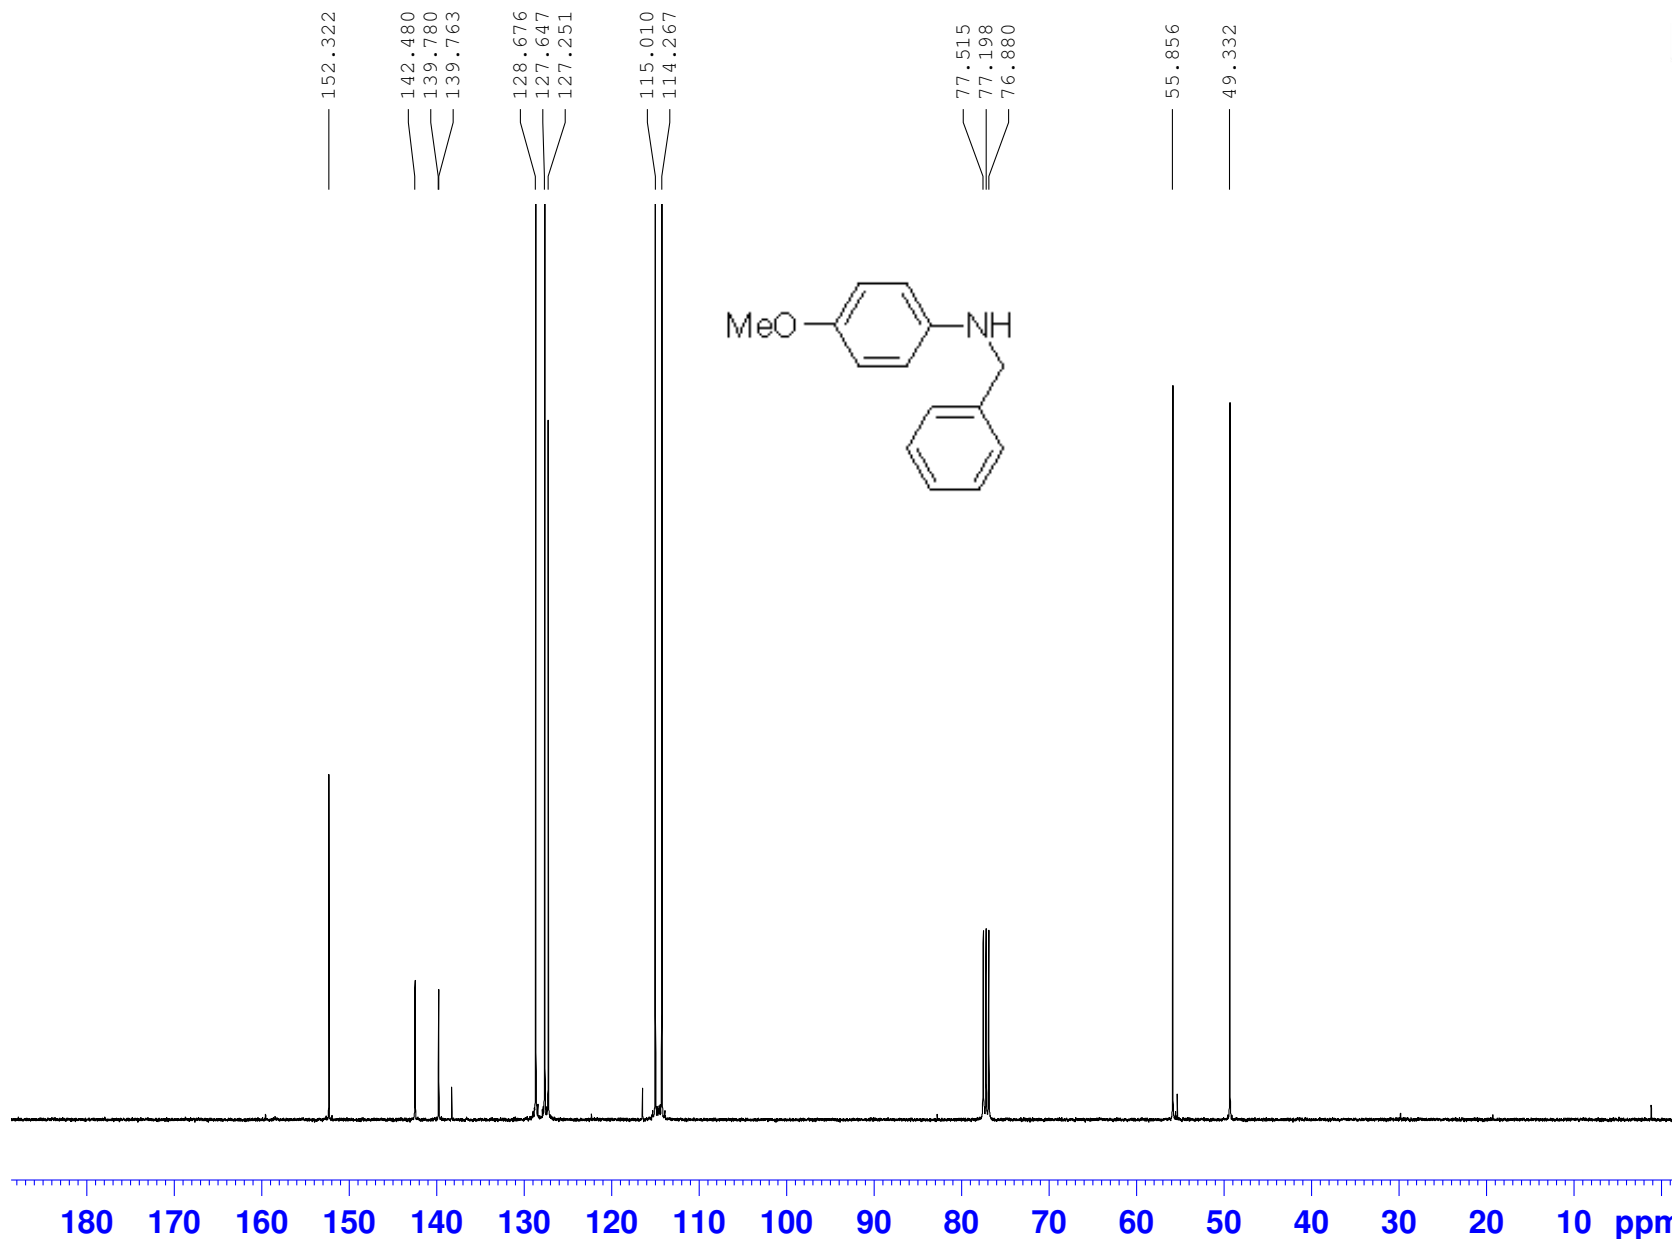

Current Data Parameters  
NAME wdp  
EXPNO 227  
PROCNO 1

F2 - Acquisition Parameters  
Date\_ 20080528  
Time 11.27  
INSTRUM spect  
PROBHD 5 mm PABBO BB-  
PULPROG zgpg30  
TD 65536  
SOLVENT CDCl3  
NS 2048  
DS 4  
SWH 23980.814 Hz  
FIDRES 0.365918 Hz  
AQ 1.3664756 sec  
RG 724.1  
DW 20.850 usec  
DE 6.00 usec  
TE 299.0 K  
D1 2.00000000 sec  
d11 0.03000000 sec  
DELTA 1.89999998 sec  
TD0 1

==== CHANNEL f1 =====  
NUC1 13C  
P1 12.20 usec  
PL1 1.00 dB  
SFO1 100.6228298 MHz

==== CHANNEL f2 =====  
CPDPRG2 waltz16  
NUC2 1H  
PCPD2 80.00 usec  
PL2 0.00 dB  
PL12 15.39 dB  
PL13 15.50 dB  
SFO2 400.1316005 MHz

F2 - Processing parameters  
SI 32768  
SF 100.6127690 MHz  
WDW EM  
SSB 0  
LB 1.00 Hz  
GB 0  
PC 1.40

wdp125202

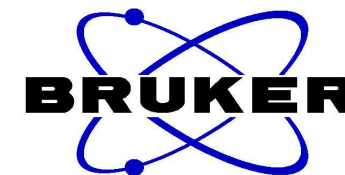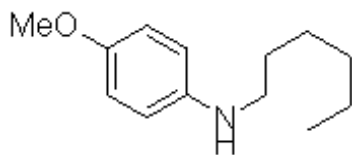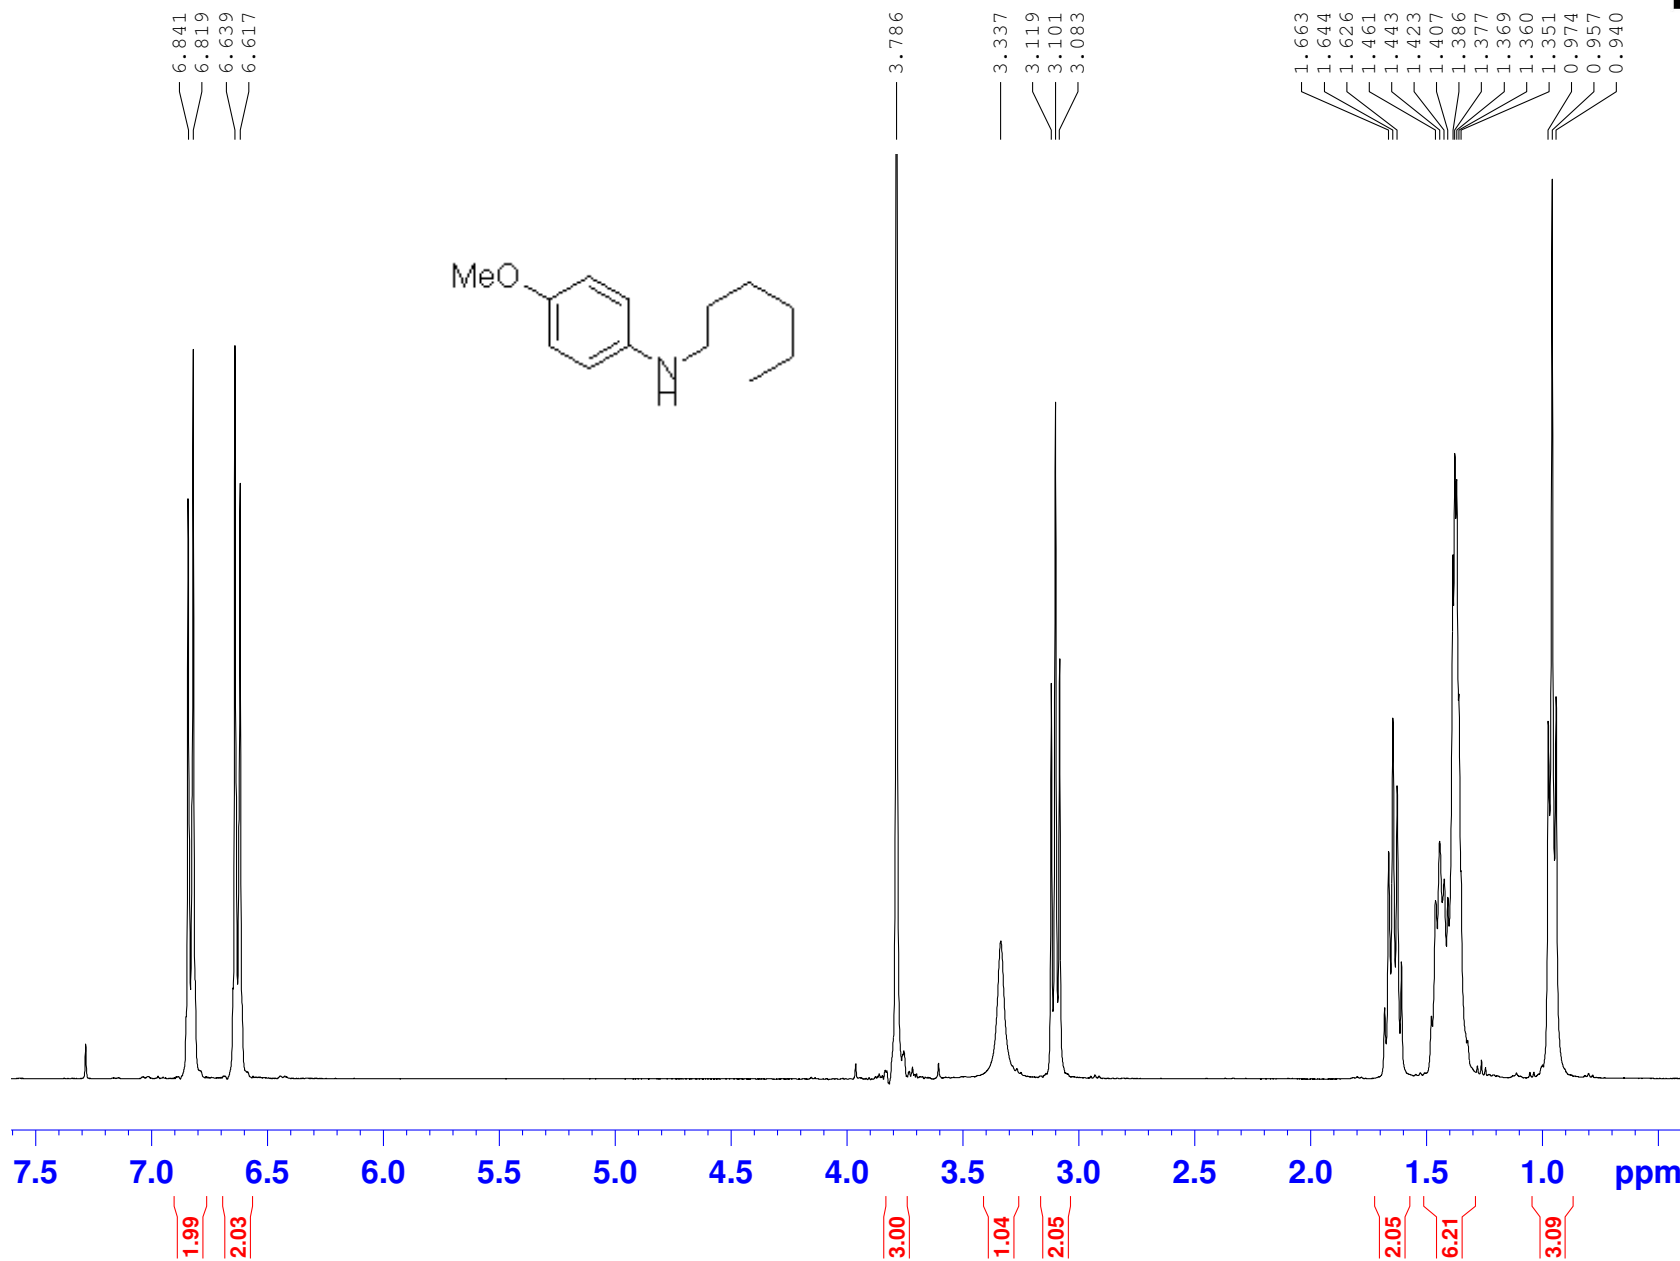

Current Data Parameters  
NAME wdp  
EXPNO 231  
PROCNO 1

F2 - Acquisition Parameters  
Date\_ 20080605  
Time 9.36  
INSTRUM spect  
PROBHD 5 mm PABBO BB-  
PULPROG zg30  
TD 65536  
SOLVENT CDCl3  
NS 2  
DS 2  
SWH 8278.146 Hz  
FIDRES 0.126314 Hz  
AQ 3.9584243 sec  
RG 25.4  
DW 60.400 usec  
DE 6.00 usec  
TE 299.8 K  
D1 1.00000000 sec  
TD0 1

==== CHANNEL f1 =====  
NUC1 1H  
P1 13.60 usec  
PL1 0.00 dB  
SFO1 400.1324710 MHz

F2 - Processing parameters  
SI 32768  
SF 400.1300000 MHz  
WDW EM  
SSB 0  
LB 0.30 Hz  
GB 0  
PC 1.00

wdp125202

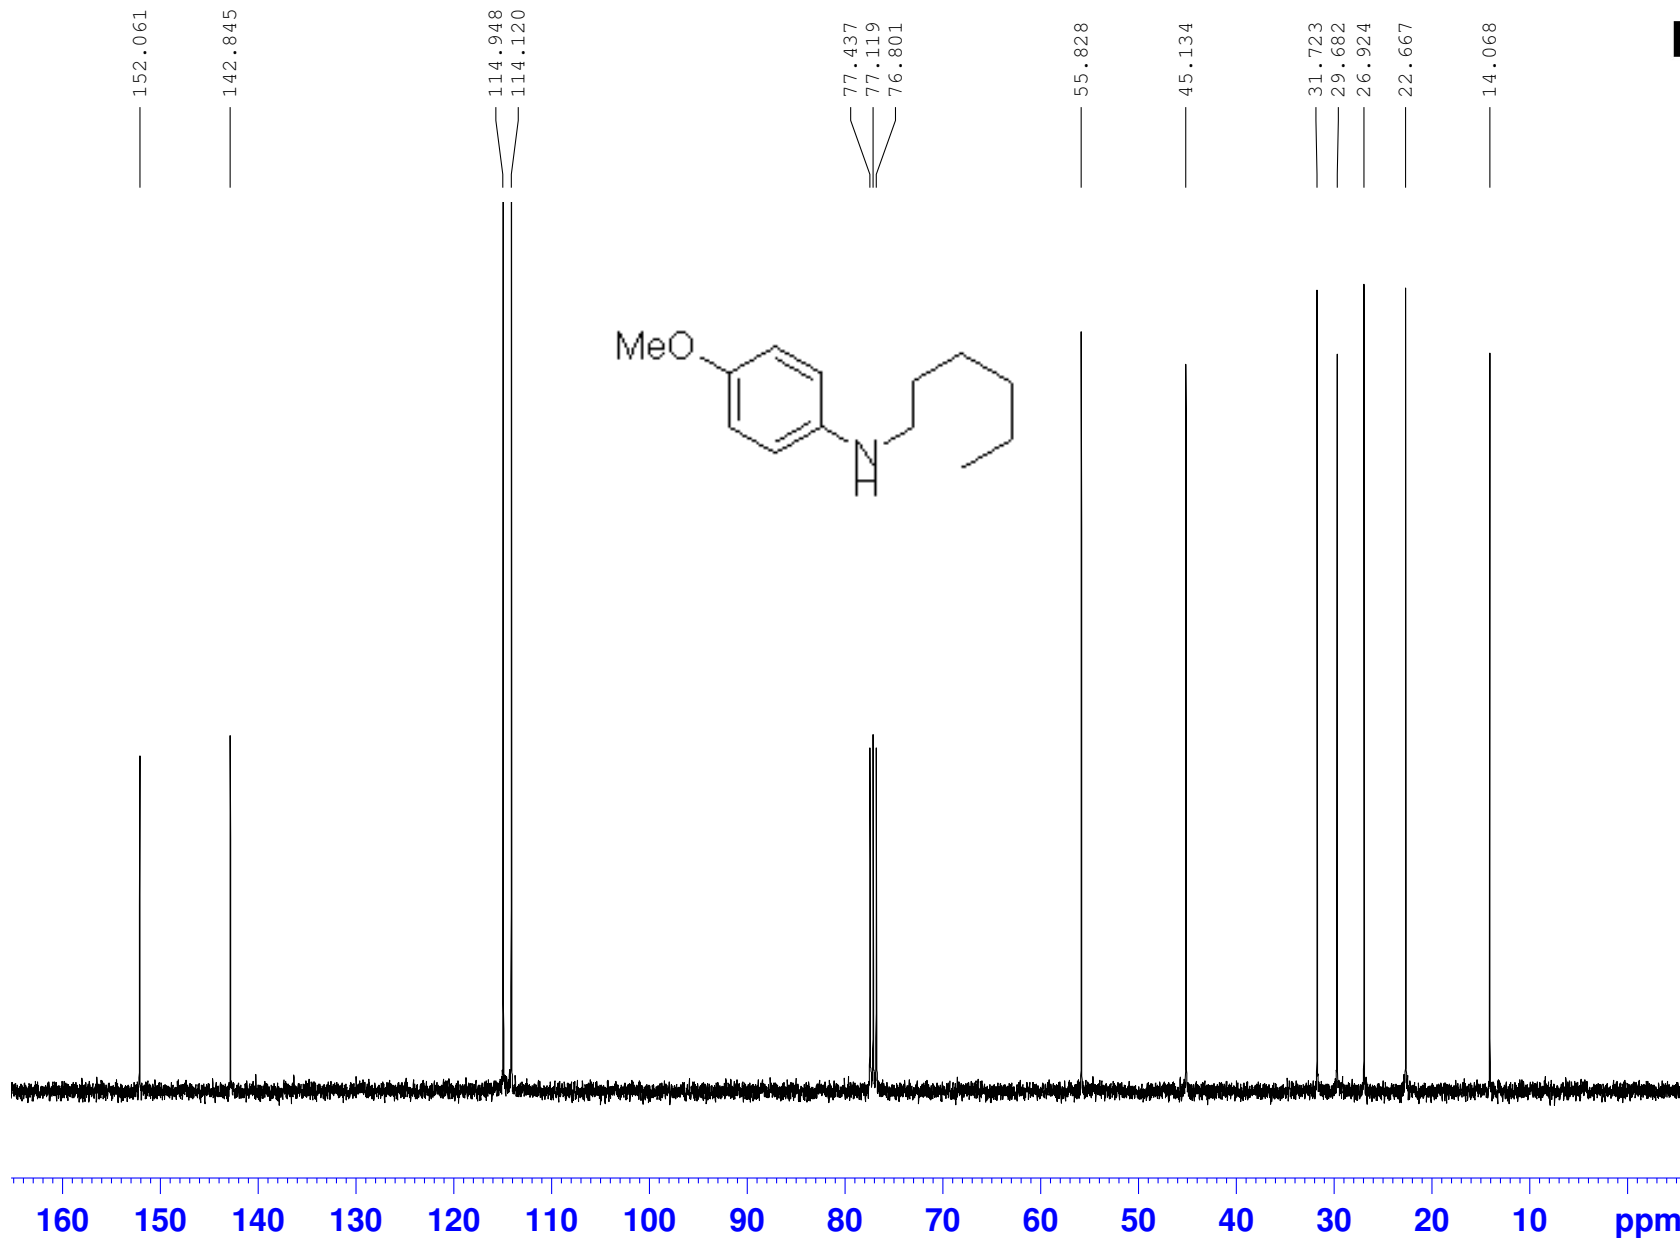

```
Current Data Parameters
NAME          wdp
EXPNO         232
PROCNO        1

F2 - Acquisition Parameters
Date_         20080605
Time          11.06
INSTRUM       spect
PROBHD        5 mm PABBO BB-
PULPROG       zgpg30
TD            65536
SOLVENT       CDCl3
NS            122
DS            4
SWH           23980.814 Hz
FIDRES        0.365918 Hz
AQ            1.3664756 sec
RG            912.3
DW            20.850 usec
DE            6.00 usec
TE            301.2 K
D1            2.00000000 sec
d11           0.03000000 sec
DELTA         1.89999998 sec
TD0           1

===== CHANNEL f1 =====
NUC1          13C
P1            12.20 usec
PL1           1.00 dB
SFO1          100.6228298 MHz

===== CHANNEL f2 =====
CPDPRG2       waltz16
NUC2          1H
PCPD2         80.00 usec
PL2           0.00 dB
PL12          15.39 dB
PL13          15.50 dB
SFO2          400.1316005 MHz

F2 - Processing parameters
SI            32768
SF            100.6127690 MHz
WDW           EM
SSB           0
LB            1.00 Hz
GB            0
PC            1.40
```

125275



7.415  
7.393  
7.260

6.569  
6.548

4.518  
4.511

3.150  
3.132  
3.114

1.659  
1.641  
1.623  
1.605  
1.586  
1.425  
1.405  
1.389  
1.369  
1.351  
1.329  
1.319  
1.311  
1.294  
1.264  
1.254  
0.912  
0.896  
0.879

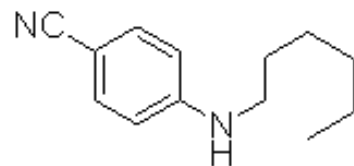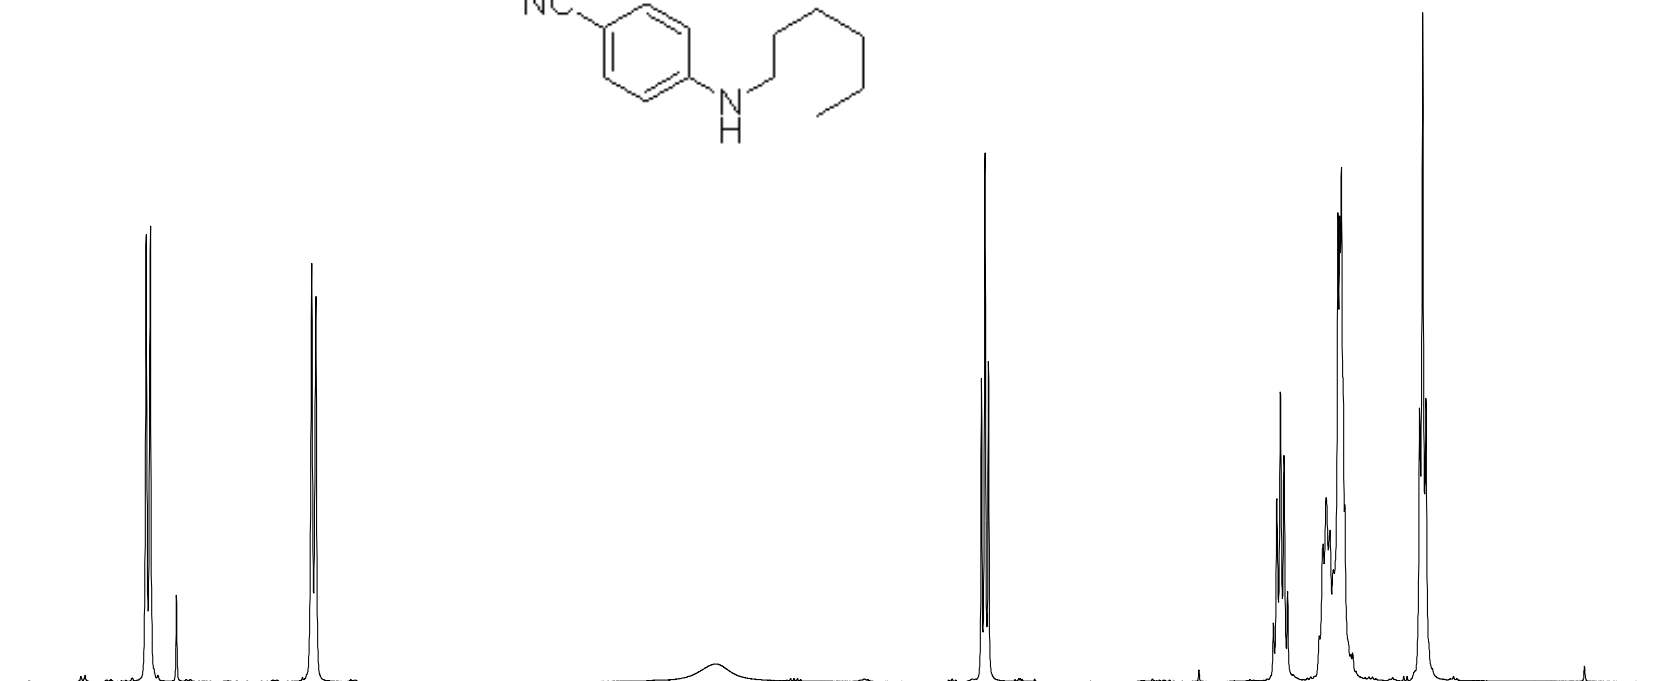

Current Data Parameters  
NAME wdp  
EXPNO 267  
PROCNO 1

F2 - Acquisition Parameters  
Date\_ 20080809  
Time 12.47  
INSTRUM spect  
PROBHD 5 mm PABBO BB-  
PULPROG zg30  
TD 65536  
SOLVENT CDCl3  
NS 16  
DS 2  
SWH 8278.146 Hz  
FIDRES 0.126314 Hz  
AQ 3.9584243 sec  
RG 90.5  
DW 60.400 usec  
DE 6.00 usec  
TE 299.7 K  
D1 1.00000000 sec  
TD0 1

==== CHANNEL f1 =====  
NUC1 1H  
P1 13.60 usec  
PL1 0.00 dB  
SFO1 400.1324710 MHz

F2 - Processing parameters  
SI 32768  
SF 400.1300093 MHz  
WDW EM  
SSB 0  
LB 0.30 Hz  
GB 0  
PC 1.00

7.5 7.0 6.5 6.0 5.5 5.0 4.5 4.0 3.5 3.0 2.5 2.0 1.5 1.0 0.5 ppm

2.00 2.07 0.95 2.08 2.15 6.49 3.20

125275

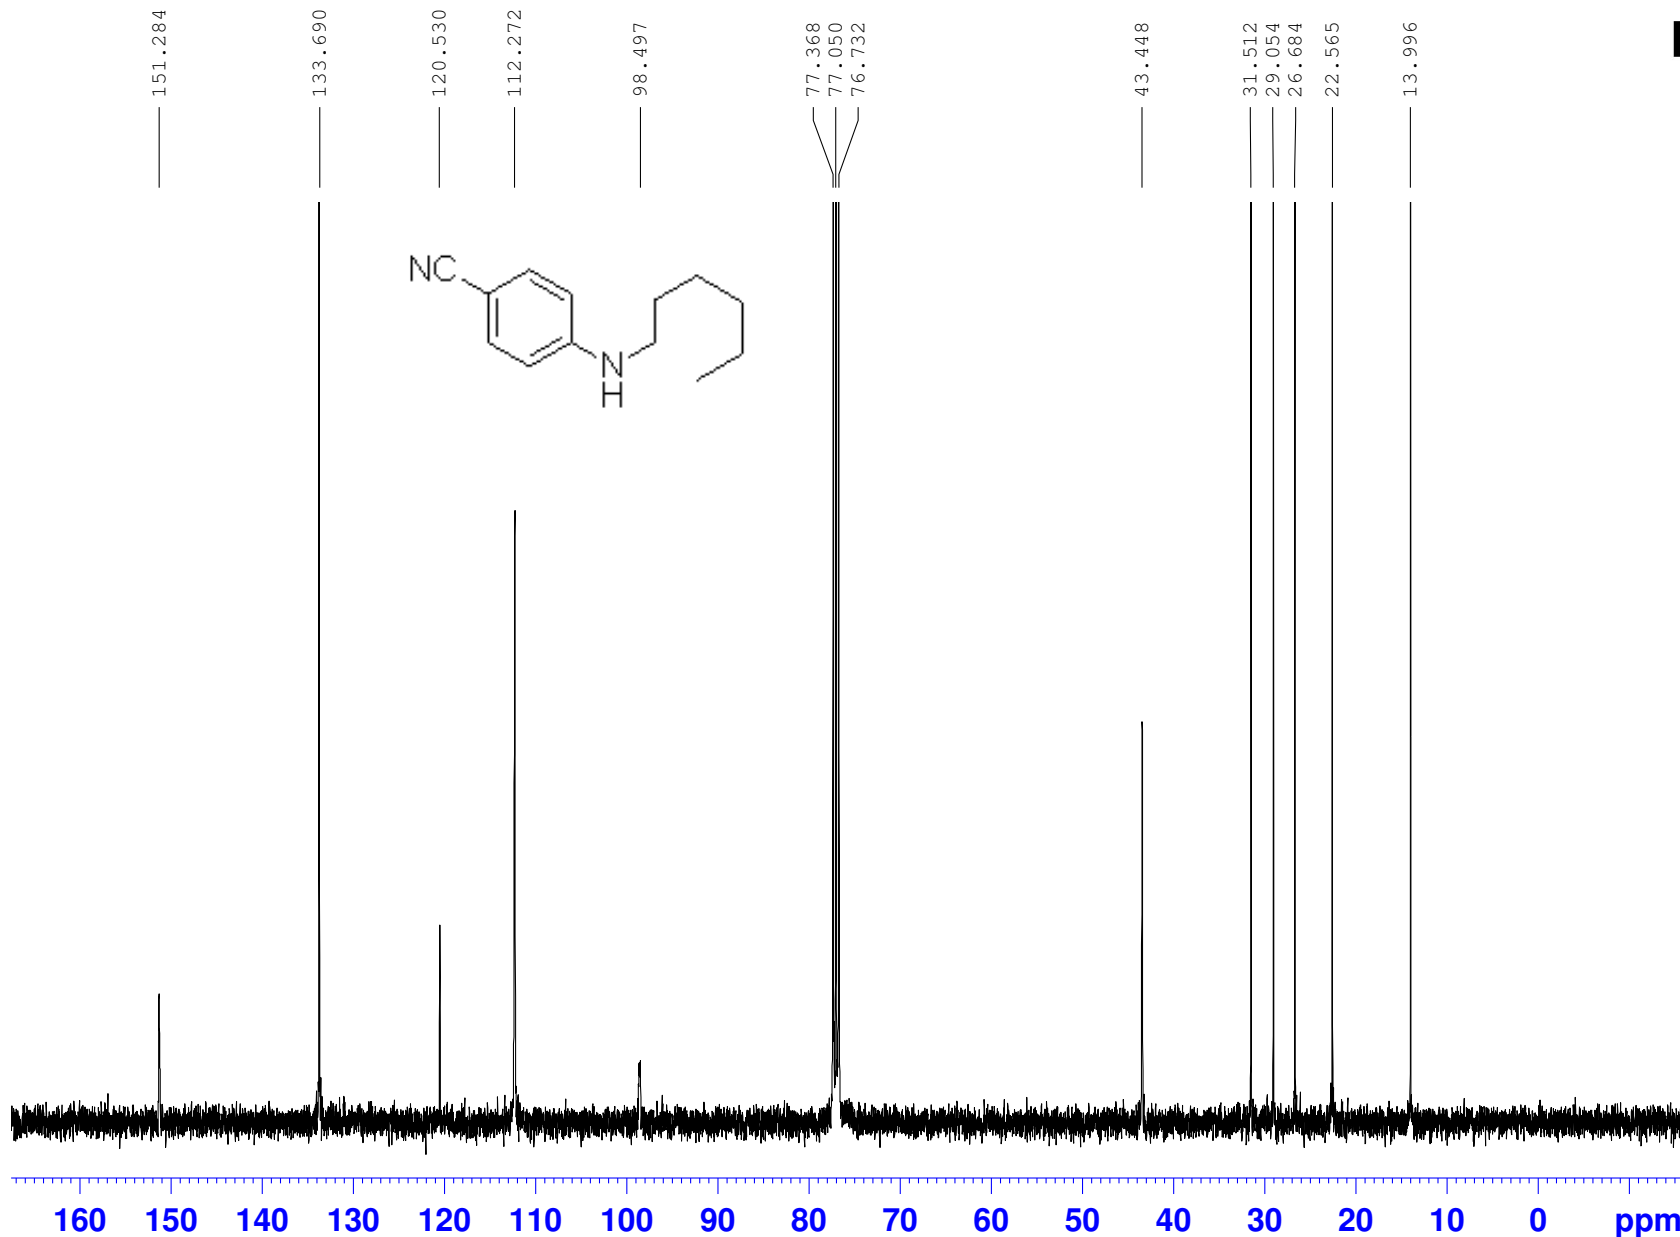

Current Data Parameters  
NAME wdp  
EXPNO 268  
PROCNO 1

F2 - Acquisition Parameters  
Date\_ 20080809  
Time 13.01  
INSTRUM spect  
PROBHD 5 mm PABBO BB-  
PULPROG zgpg30  
TD 65536  
SOLVENT CDCl3  
NS 1024  
DS 4  
SWH 23980.814 Hz  
FIDRES 0.365918 Hz  
AQ 1.3664756 sec  
RG 1024  
DW 20.850 usec  
DE 6.00 usec  
TE 299.8 K  
D1 2.00000000 sec  
d11 0.03000000 sec  
DELTA 1.89999998 sec  
TD0 1

==== CHANNEL f1 =====  
NUC1 13C  
P1 12.20 usec  
PL1 1.00 dB  
SFO1 100.6228298 MHz

==== CHANNEL f2 =====  
CPDPRG2 waltz16  
NUC2 1H  
PCPD2 80.00 usec  
PL2 0.00 dB  
PL12 15.39 dB  
PL13 15.50 dB  
SFO2 400.1316005 MHz

F2 - Processing parameters  
SI 32768  
SF 100.6127690 MHz  
WDW EM  
SSB 0  
LB 1.00 Hz  
GB 0  
PC 1.40

125276

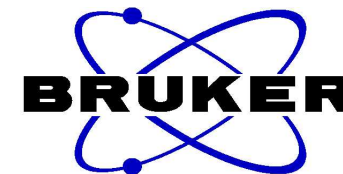

7.260  
7.213  
7.195  
7.192  
7.178  
7.174  
6.734  
6.716  
6.697  
6.647  
6.628

3.732

3.140  
3.122  
3.104

1.673  
1.656  
1.637  
1.619  
1.600  
1.456  
1.439  
1.436  
1.420  
1.400  
1.385  
1.380  
1.370  
1.357  
1.347  
1.340  
1.331  
1.322  
1.292  
0.965  
0.941  
0.924  
0.907

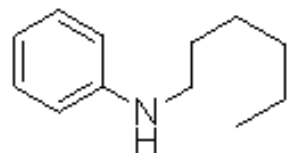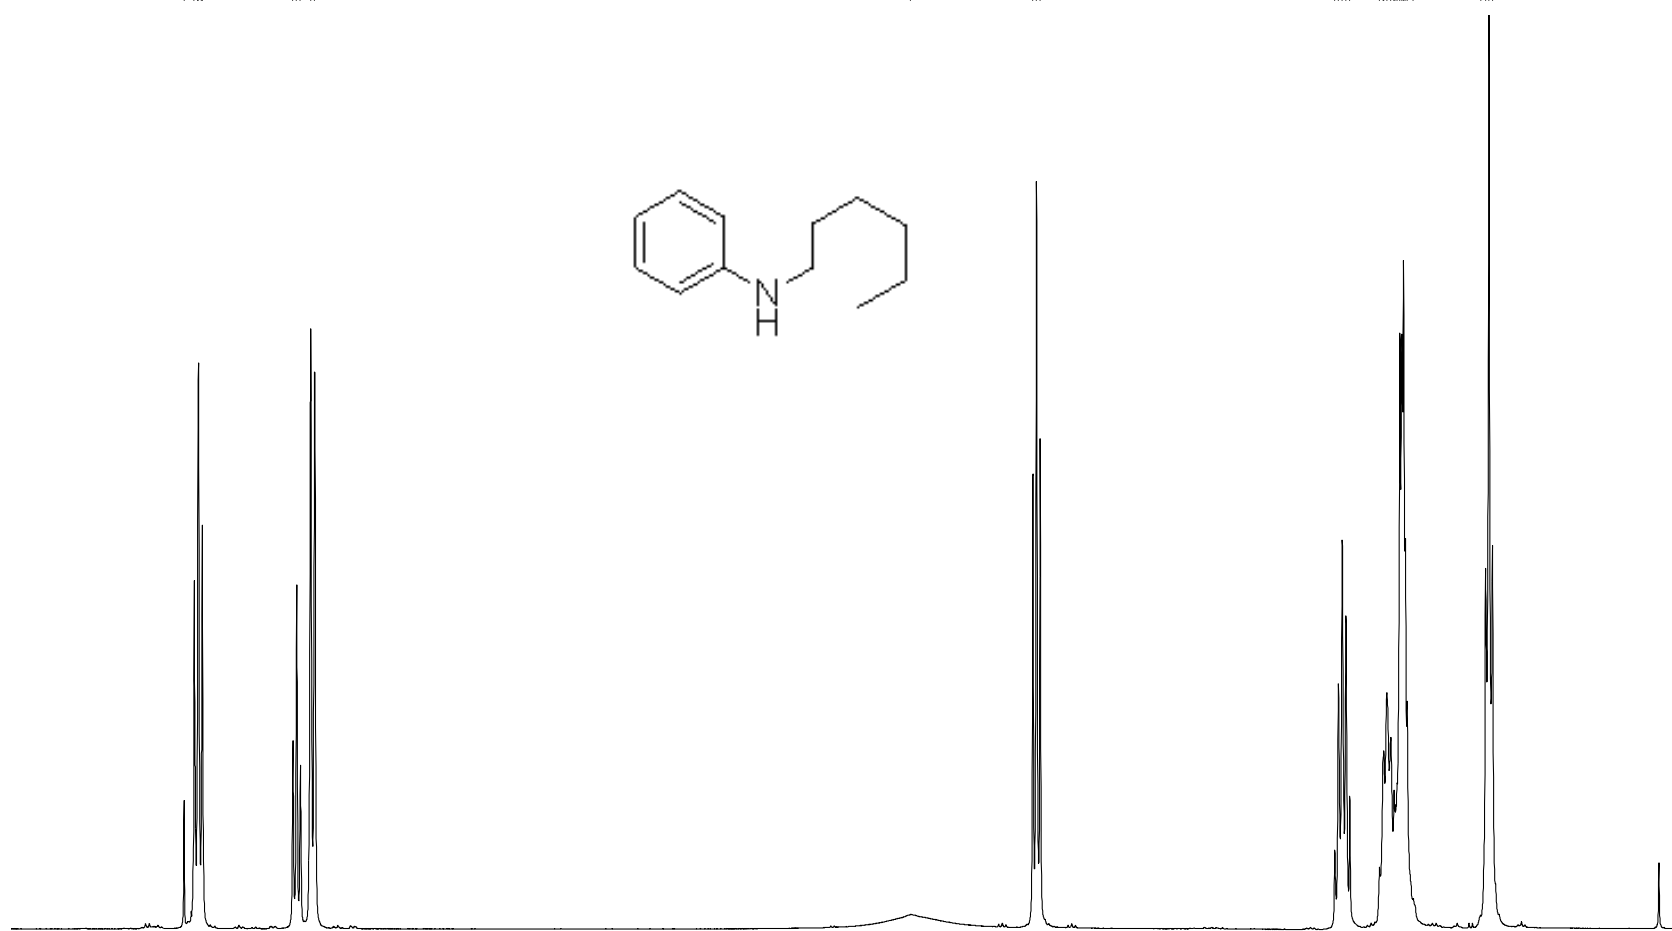

2.00

0.99  
2.04

0.95

2.12

2.13

6.49

3.20

Current Data Parameters  
NAME wdp  
EXPNO 266  
PROCNO 1

F2 - Acquisition Parameters  
Date\_ 20080809  
Time\_ 12.42  
INSTRUM spect  
PROBHD 5 mm PABBO BB-  
PULPROG zg30  
TD 65536  
SOLVENT CDCl3  
NS 15  
DS 2  
SWH 8278.146 Hz  
FIDRES 0.126314 Hz  
AQ 3.9584243 sec  
RG 71.8  
DW 60.400 usec  
DE 6.00 usec  
TE 300.1 K  
D1 1.00000000 sec  
TD0 1

==== CHANNEL f1 =====  
NUC1 1H  
P1 13.60 usec  
PL1 0.00 dB  
SFO1 400.1324710 MHz

F2 - Processing parameters  
SI 32768  
SF 400.1300092 MHz  
WDW EM  
SSB 0  
LB 0.30 Hz  
GB 0  
PC 1.00



125276

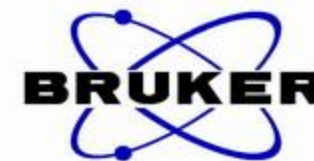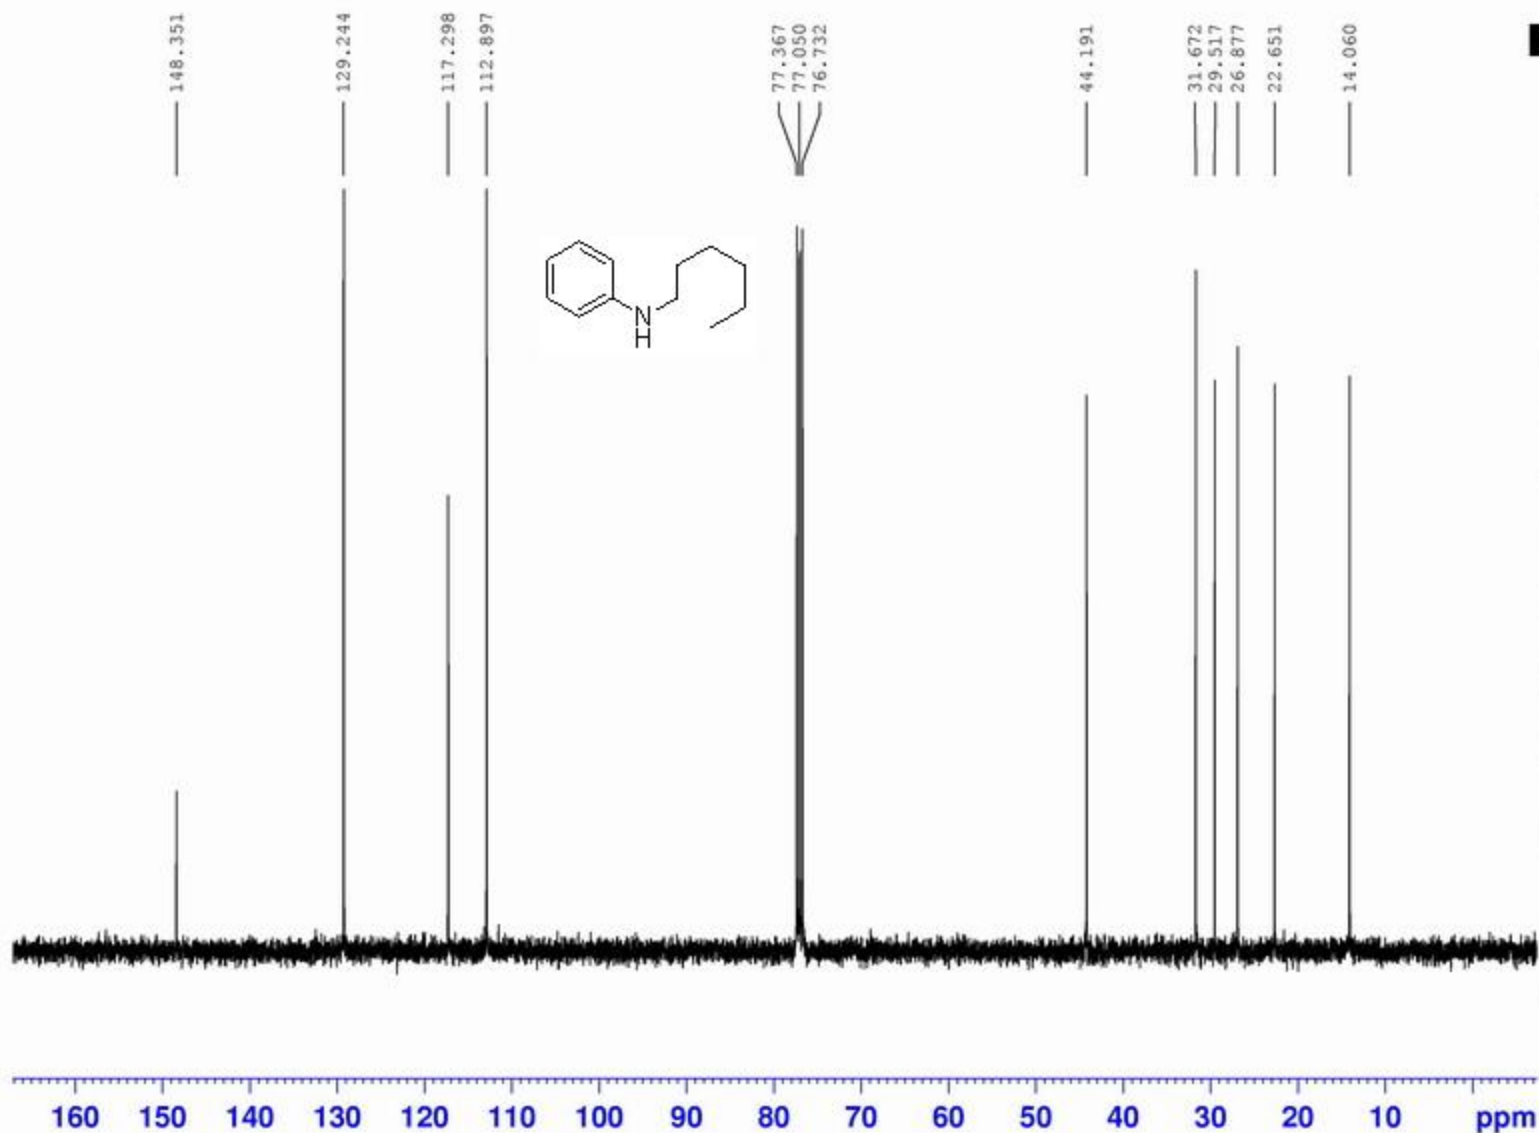

Current Data Parameters  
 NAME wdp  
 EXPNO 269  
 PROCNO 1

F2 - Acquisition Parameters  
 Date\_ 20080809  
 Time 14.27  
 INSTRUM spect  
 PROBHD 5 mm PABBO BB-  
 PULPROG zgpg30  
 TD 65536  
 SOLVENT CDCl3  
 NS 126  
 DS 4  
 SWH 23980.814 Hz  
 FIDRES 0.365918 Hz  
 AQ 1.3664756 sec  
 RG 812.7  
 DW 20.850 usec  
 DE 6.00 usec  
 TE 299.7 K  
 D1 2.0000000 sec  
 d11 0.0300000 sec  
 DELTA 1.89999998 sec  
 TDO 1

----- CHANNEL f1 -----  
 NUC1 13C  
 P1 12.20 usec  
 PL1 1.00 dB  
 SFO1 100.6228298 MHz

----- CHANNEL f2 -----  
 CPDPRG2 waltz16  
 NUC2 1H  
 PCPD2 80.00 usec  
 PL2 0.00 dB  
 PL12 15.39 dB  
 PL13 15.50 dB  
 SFO2 400.1316005 MHz

F2 - Processing parameters  
 SI 32768  
 SF 100.6127690 MHz  
 WDW EM  
 SSB 0  
 LB 1.00 Hz  
 CB 0  
 PC 1.40

125279



8.040  
8.016

6.585  
6.562

3.370  
3.354  
3.338

2.507

1.994  
1.978  
1.961

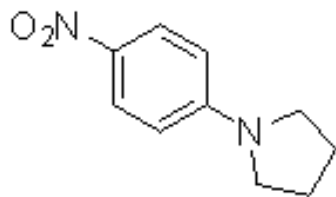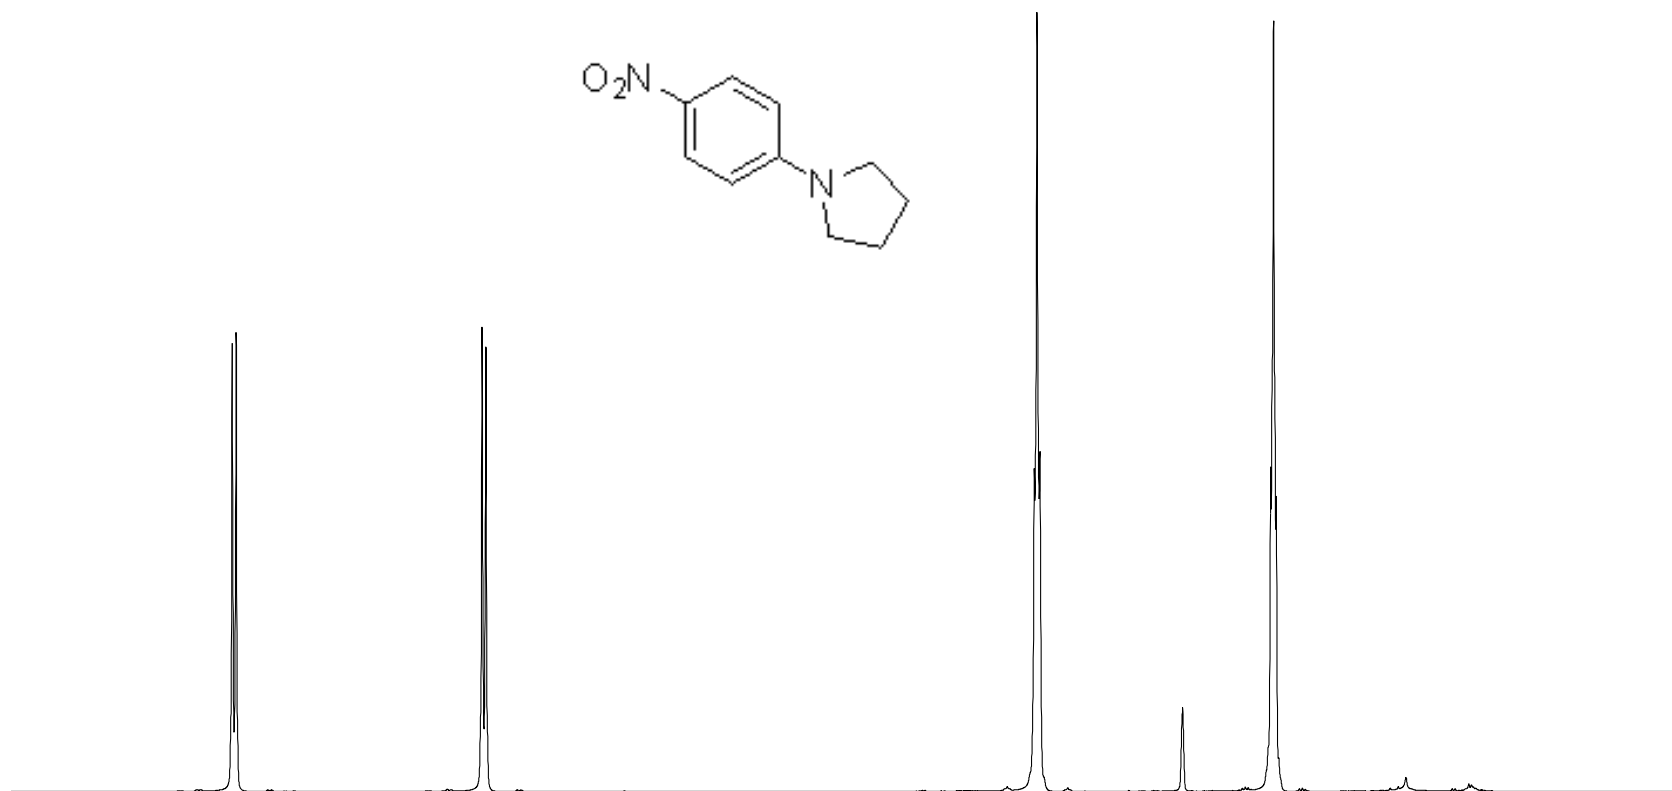

9.0 8.5 8.0 7.5 7.0 6.5 6.0 5.5 5.0 4.5 4.0 3.5 3.0 2.5 2.0 1.5 1.0 0.5 ppm

2.00

2.07

4.25

4.14

Current Data Parameters  
NAME wdp  
EXPNO 270  
PROCNO 1

F2 - Acquisition Parameters  
Date\_ 20080810  
Time 12.13  
INSTRUM spect  
PROBHD 5 mm PABBO BB-  
PULPROG zg30  
TD 65536  
SOLVENT DMSO  
NS 16  
DS 2  
SWH 8278.146 Hz  
FIDRES 0.126314 Hz  
AQ 3.9584243 sec  
RG 80.6  
DW 60.400 usec  
DE 6.00 usec  
TE 298.8 K  
D1 1.00000000 sec  
TD0 1

==== CHANNEL f1 =====  
NUC1 1H  
P1 13.60 usec  
PL1 0.00 dB  
SFO1 400.1324710 MHz

F2 - Processing parameters  
SI 32768  
SF 400.1300000 MHz  
WDW EM  
SSB 0  
LB 0.30 Hz  
GB 0  
PC 1.00

125279

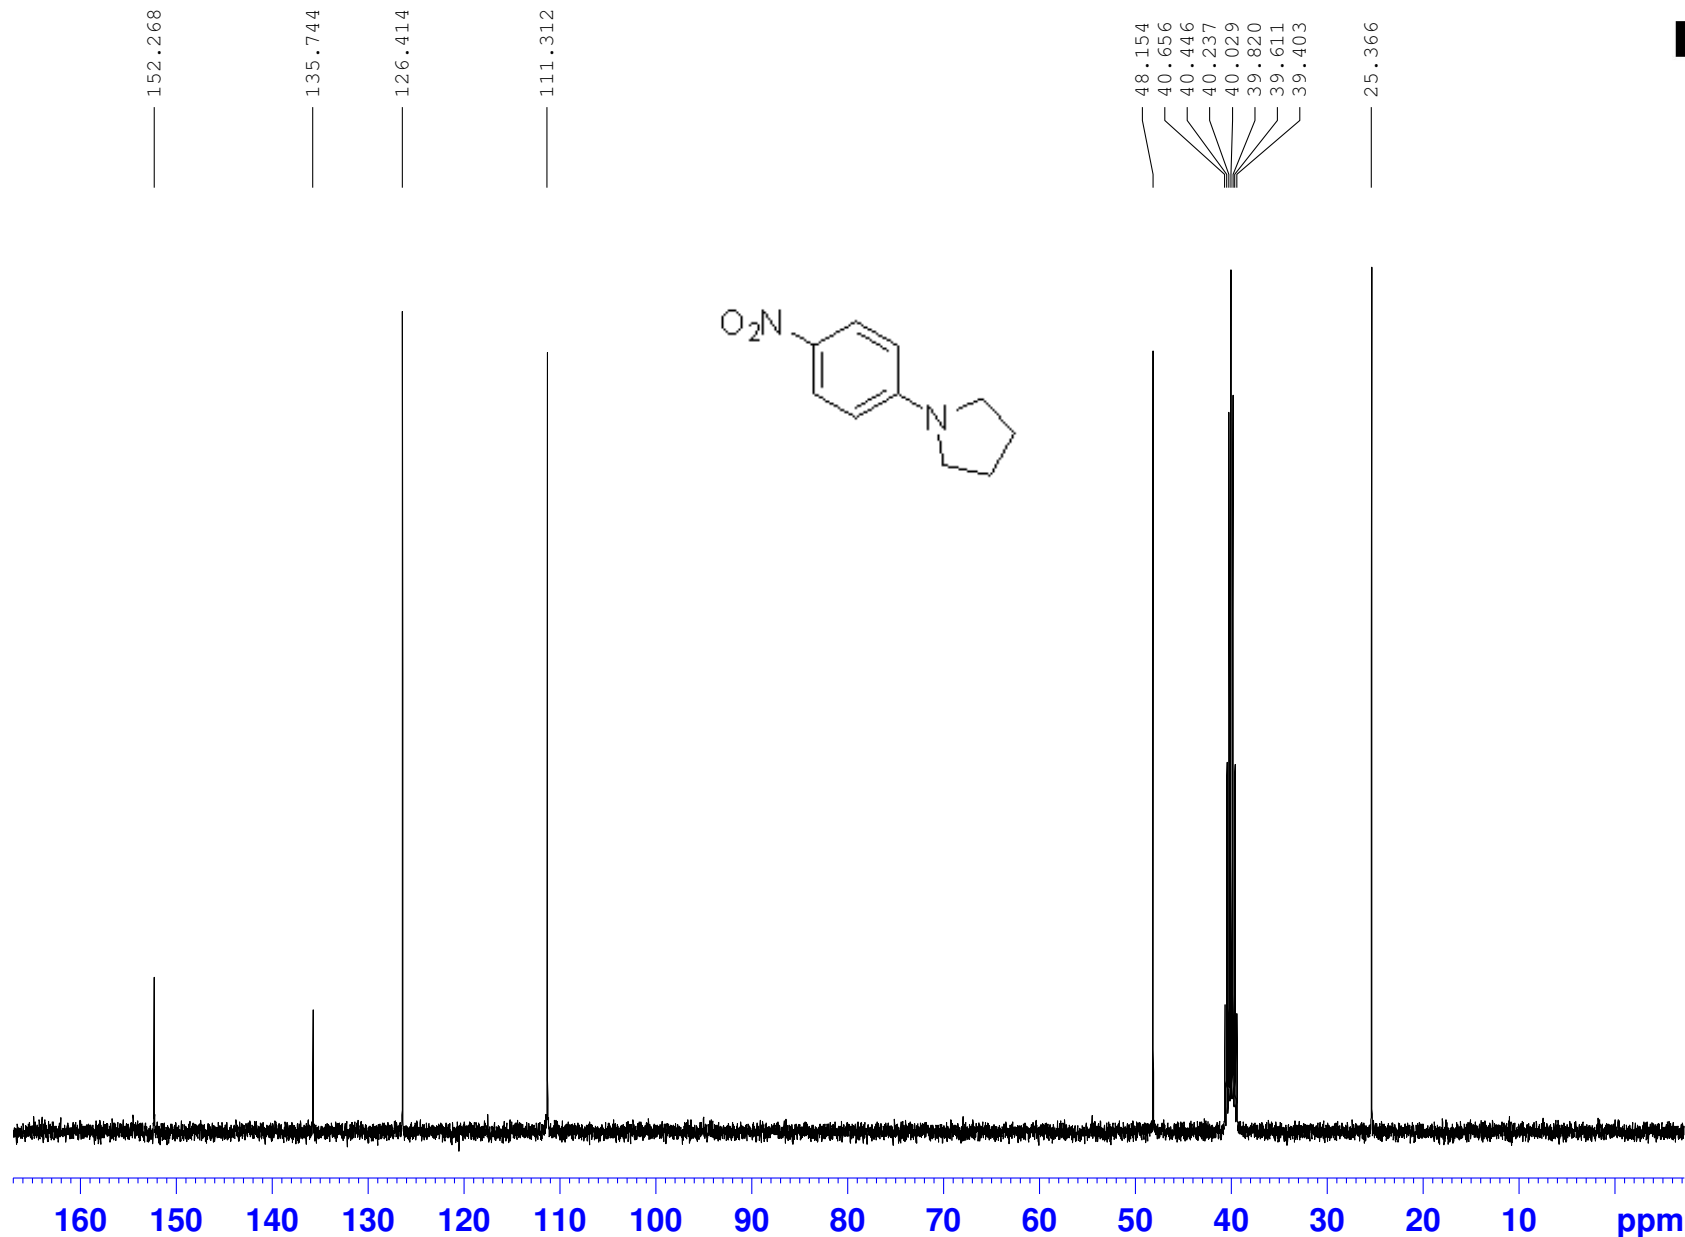

```
Current Data Parameters
NAME          wdp
EXPNO         273
PROCNO        1

F2 - Acquisition Parameters
Date_         20080810
Time          14.30
INSTRUM       spect
PROBHD        5 mm PABBO BB-
PULPROG       zgpg30
TD            65536
SOLVENT       DMSO
NS            102
DS            4
SWH           23980.814 Hz
FIDRES        0.365918 Hz
AQ            1.3664756 sec
RG            1290.2
DW            20.850 usec
DE            6.00 usec
TE            301.6 K
D1            2.00000000 sec
d11           0.03000000 sec
DELTA         1.899999998 sec
TD0           1

===== CHANNEL f1 =====
NUC1          13C
P1            12.20 usec
PL1           1.00 dB
SFO1          100.6228298 MHz

===== CHANNEL f2 =====
CPDPRG2       waltz16
NUC2          1H
PCPD2         80.00 usec
PL2           0.00 dB
PL12          15.39 dB
PL13          15.50 dB
SFO2          400.1316005 MHz

F2 - Processing parameters
SI            32768
SF            100.6127690 MHz
WDW           EM
SSB           0
LB            1.00 Hz
GB            0
PC            1.40
```

125280



7.496  
7.478  
7.452  
7.433  
7.414  
7.359  
7.341  
7.323  
7.235  
7.216  
7.196  
6.794  
6.776  
6.757  
6.649  
6.629

4.629  
4.612  
4.595  
4.578

1.635  
1.618

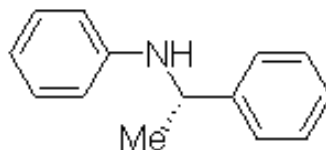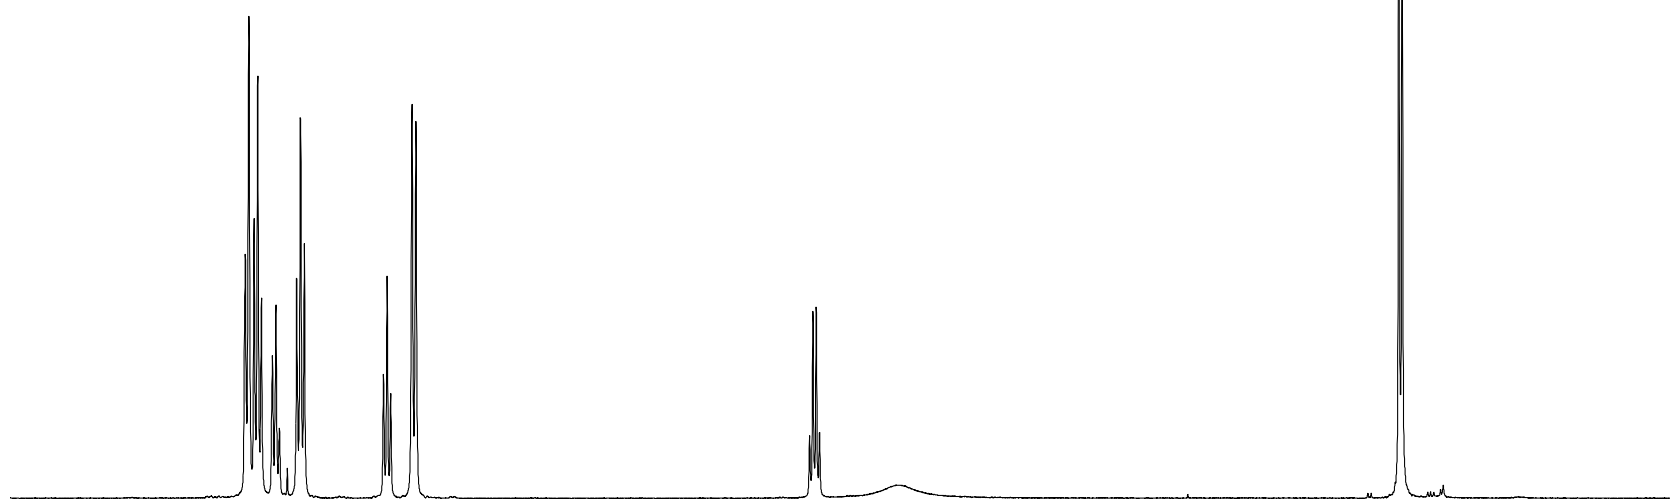

8.5 8.0 7.5 7.0 6.5 6.0 5.5 5.0 4.5 4.0 3.5 3.0 2.5 2.0 1.5 1.0 ppm

1.94  
1.98  
0.96  
1.94

0.95  
1.94

0.99

0.85

3.00

Current Data Parameters  
NAME wdp  
EXPNO 275  
PROCNO 1

F2 - Acquisition Parameters  
Date\_ 20080812  
Time 10.07  
INSTRUM spect  
PROBHD 5 mm PABBO BB-  
PULPROG zg30  
TD 65536  
SOLVENT CDCl3  
NS 2  
DS 2  
SWH 8278.146 Hz  
FIDRES 0.126314 Hz  
AQ 3.9584243 sec  
RG 4  
DW 60.400 usec  
DE 6.00 usec  
TE 299.9 K  
D1 1.00000000 sec  
TD0 1

==== CHANNEL f1 =====  
NUC1 1H  
P1 13.60 usec  
PL1 0.00 dB  
SFO1 400.1324710 MHz

F2 - Processing parameters  
SI 32768  
SF 400.1300000 MHz  
WDW EM  
SSB 0  
LB 0.30 Hz  
GB 0  
PC 1.00

125280

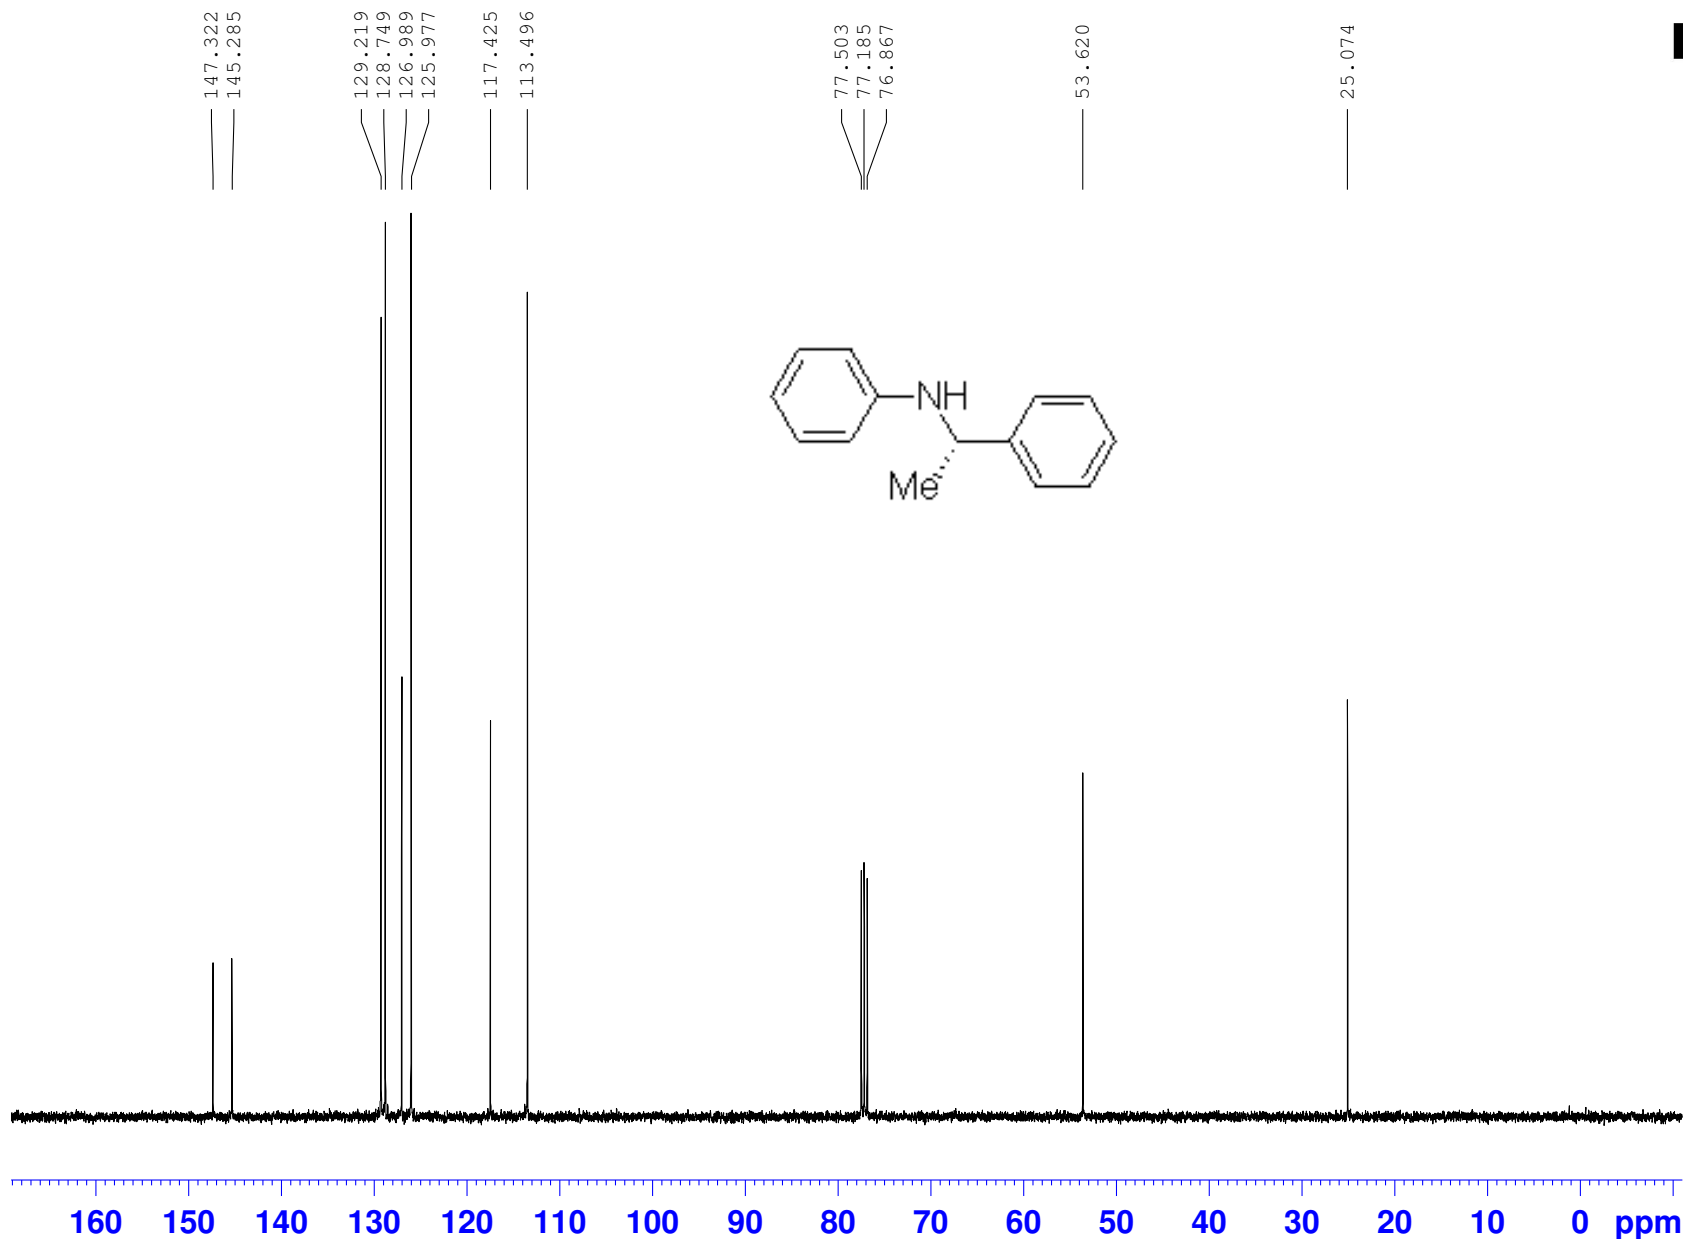

Current Data Parameters  
NAME wdp  
EXPNO 276  
PROCNO 1

F2 - Acquisition Parameters  
Date\_ 20080812  
Time 10.14  
INSTRUM spect  
PROBHD 5 mm PABBO BB-  
PULPROG zgpg30  
TD 65536  
SOLVENT CDCl3  
NS 63  
DS 4  
SWH 23980.814 Hz  
FIDRES 0.365918 Hz  
AQ 1.3664756 sec  
RG 912.3  
DW 20.850 usec  
DE 6.00 usec  
TE 300.4 K  
D1 2.00000000 sec  
d11 0.03000000 sec  
DELTA 1.89999998 sec  
TD0 1

==== CHANNEL f1 =====  
NUC1 13C  
P1 12.20 usec  
PL1 1.00 dB  
SFO1 100.6228298 MHz

==== CHANNEL f2 =====  
CPDPRG2 waltz16  
NUC2 1H  
PCPD2 80.00 usec  
PL2 0.00 dB  
PL12 15.39 dB  
PL13 15.50 dB  
SFO2 400.1316005 MHz

F2 - Processing parameters  
SI 32768  
SF 100.6127690 MHz  
WDW EM  
SSB 0  
LB 1.00 Hz  
GB 0  
PC 1.40

125281

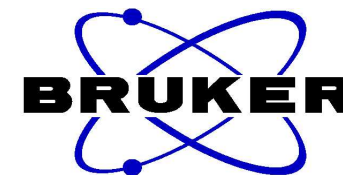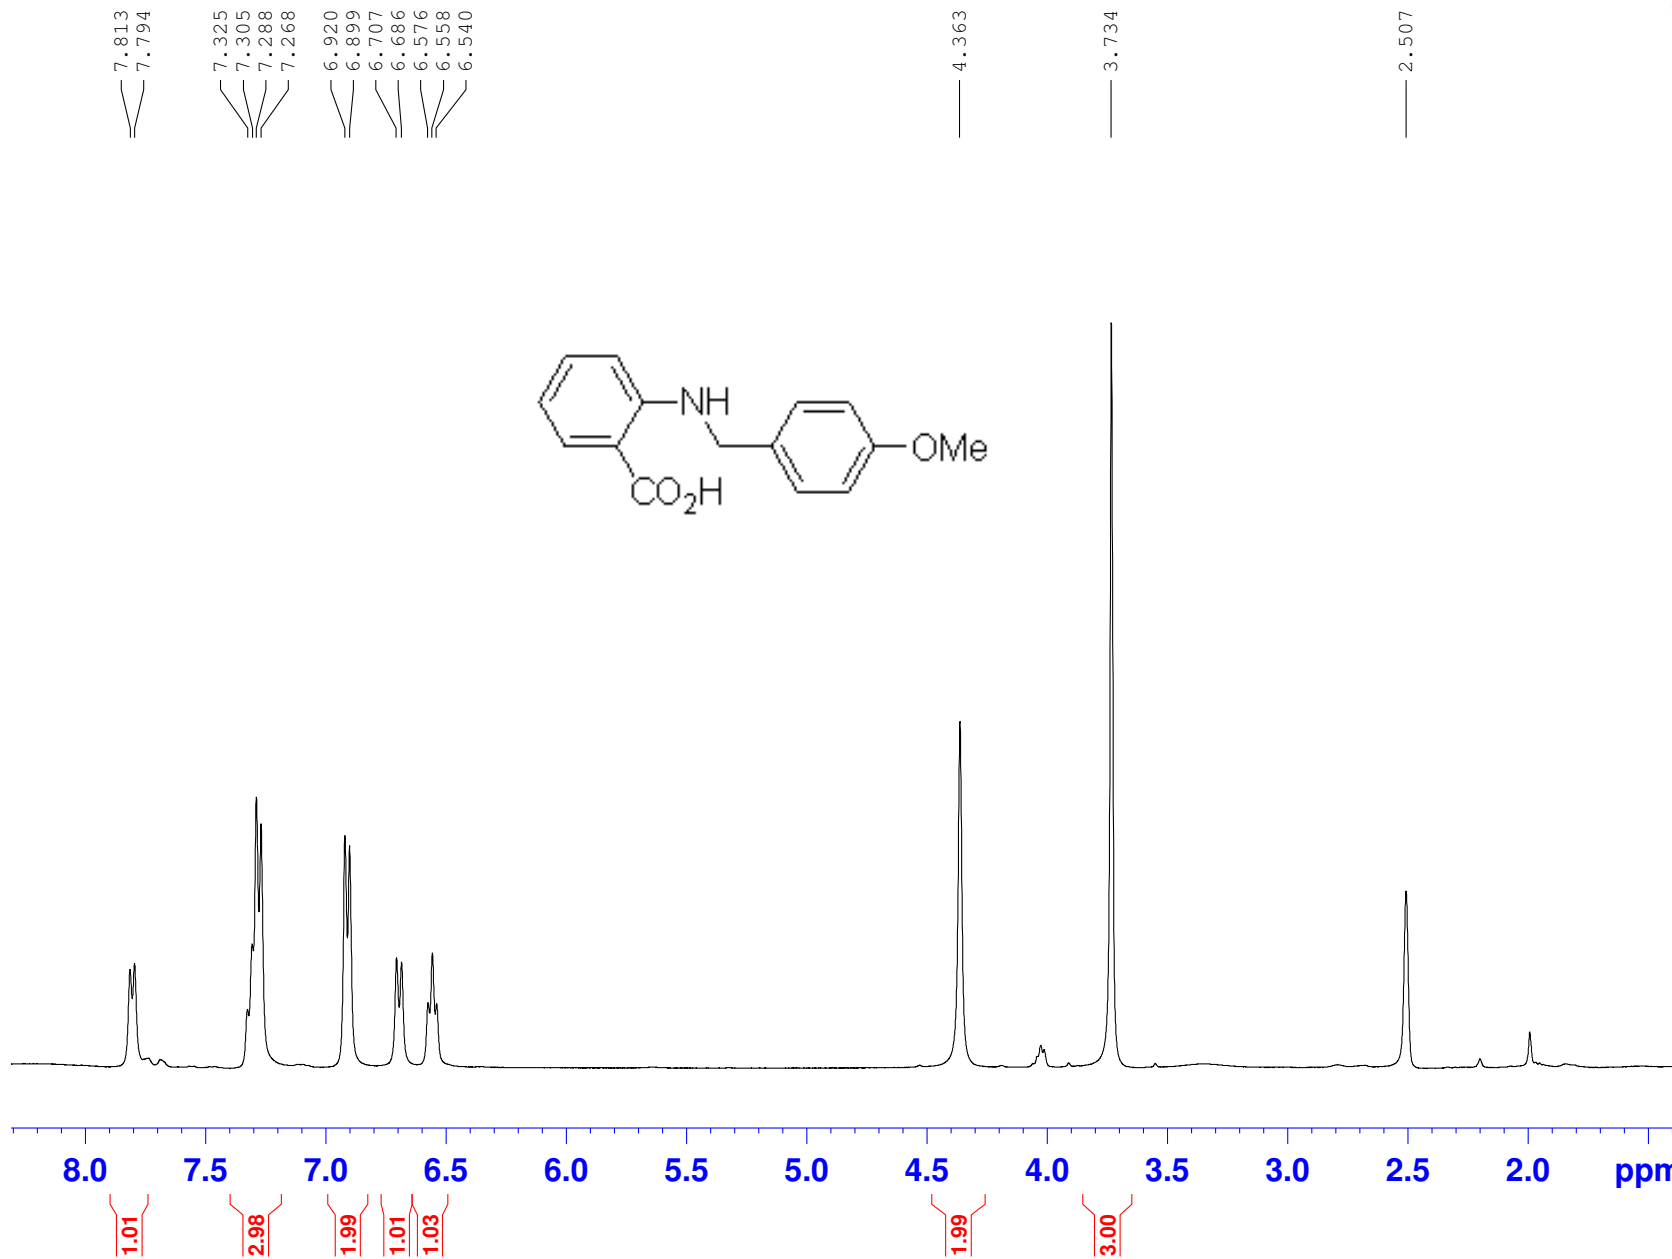

Current Data Parameters  
NAME wdp  
EXPNO 271  
PROCNO 1

F2 - Acquisition Parameters  
Date\_ 20080810  
Time 12.19  
INSTRUM spect  
PROBHD 5 mm PABBO BB-  
PULPROG zg30  
TD 65536  
SOLVENT DMSO  
NS 16  
DS 2  
SWH 8278.146 Hz  
FIDRES 0.126314 Hz  
AQ 3.9584243 sec  
RG 128  
DW 60.400 usec  
DE 6.00 usec  
TE 298.8 K  
D1 1.00000000 sec  
TD0 1

==== CHANNEL f1 =====  
NUC1 1H  
P1 13.60 usec  
PL1 0.00 dB  
SFO1 400.1324710 MHz

F2 - Processing parameters  
SI 32768  
SF 400.1300000 MHz  
WDW EM  
SSB 0  
LB 0.30 Hz  
GB 0  
PC 1.00

125281

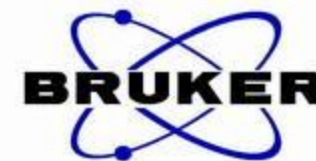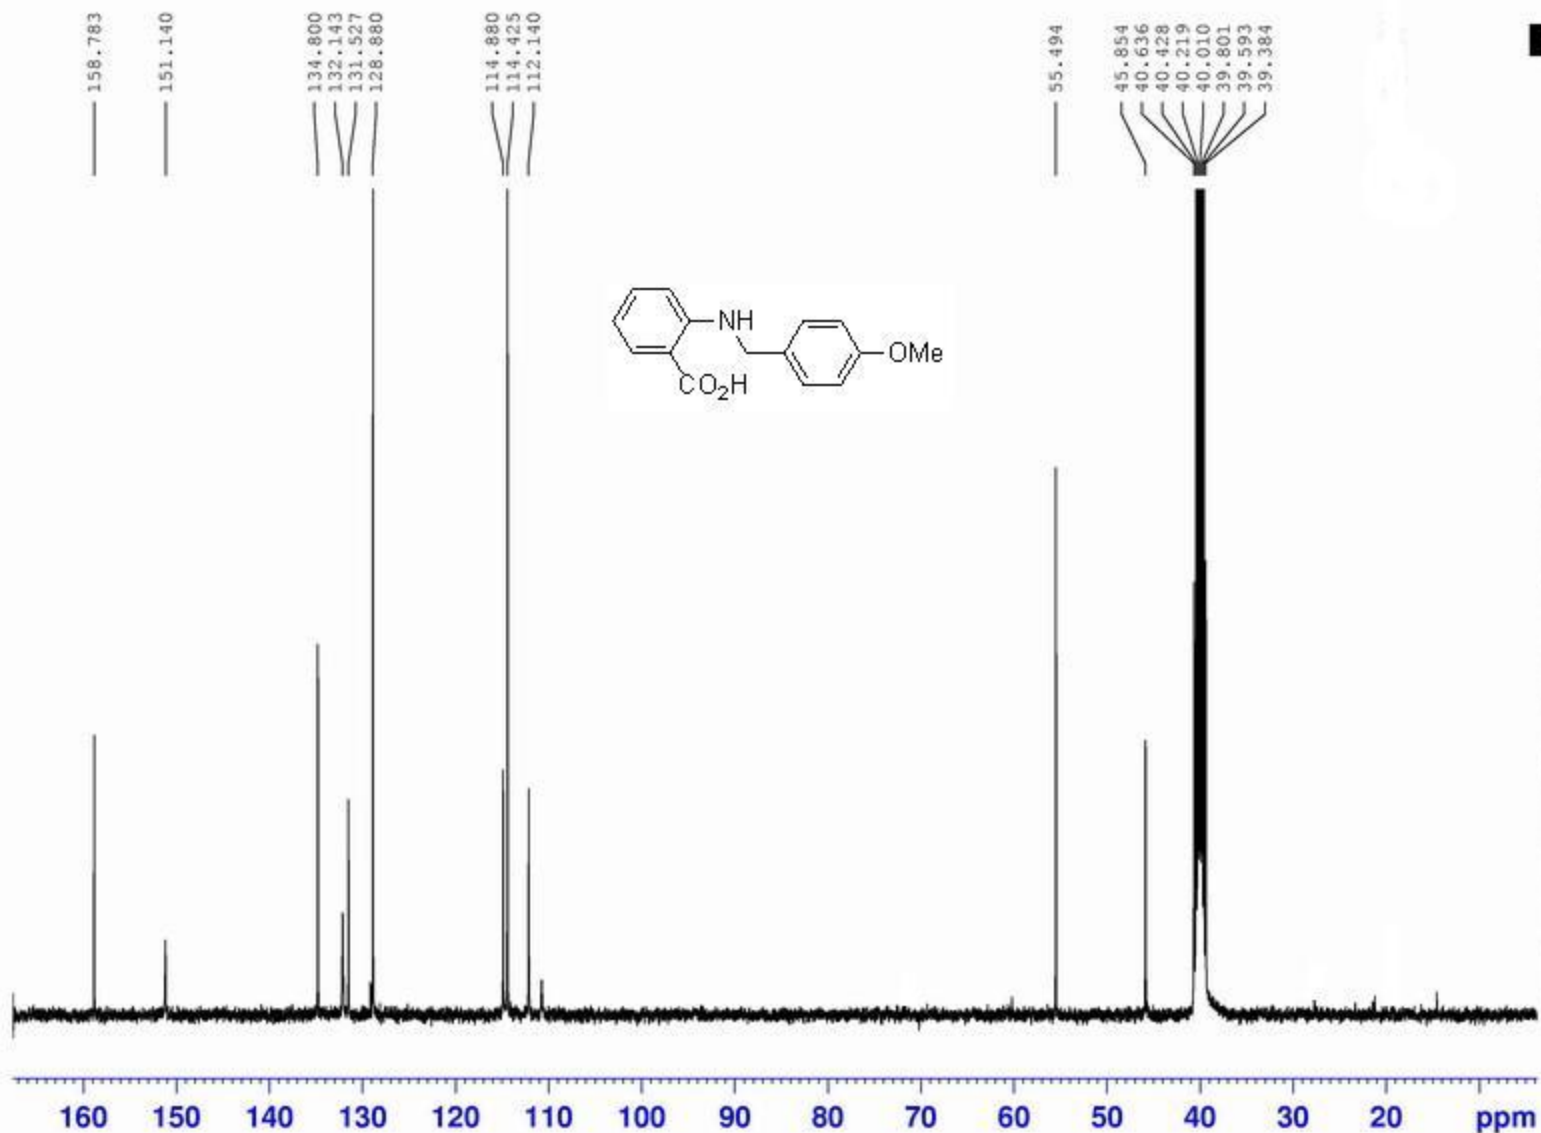

Current Data Parameters  
 NAME wdp  
 EXPNO 272  
 PROCNO 1

F2 - Acquisition Parameters  
 Date\_ 20080810  
 Time 12.30  
 INSTRUM spect  
 PROBHD 5 mm PABBO BB-  
 PULPROG zgpg30  
 TD 65536  
 SOLVENT DMSO  
 NS 2036  
 DS 4  
 SWH 23980.814 Hz  
 FIDRES 0.365918 Hz  
 AQ 1.3664756 sec  
 RG 1149.4  
 DW 20.850 usec  
 DE 6.00 usec  
 TE 299.5 K  
 D1 2.00000000 sec  
 d11 0.03000000 sec  
 DELTA 1.89999999 sec  
 TDO 1

----- CHANNEL f1 -----  
 NUC1 13C  
 P1 12.20 usec  
 PL1 1.00 dB  
 SFO1 100.6228298 MHz

----- CHANNEL f2 -----  
 CPDPRG2 waltz16  
 NUC2 1H  
 PCPD2 80.00 usec  
 PL2 0.00 dB  
 PL12 15.39 dB  
 PL13 15.50 dB  
 SFO2 400.1316005 MHz

F2 - Processing parameters  
 SI 32768  
 SF 100.6127690 MHz  
 WDW EM  
 SSB 0  
 LB 1.00 Hz  
 CB 0  
 PC 1.40

125283



8.541  
8.348  
8.329

7.284  
7.140  
7.120  
7.096  
7.057  
7.039  
7.021

2.797

2.212

1.744  
1.615

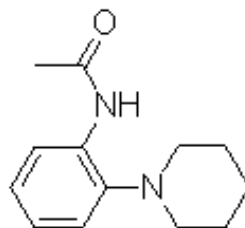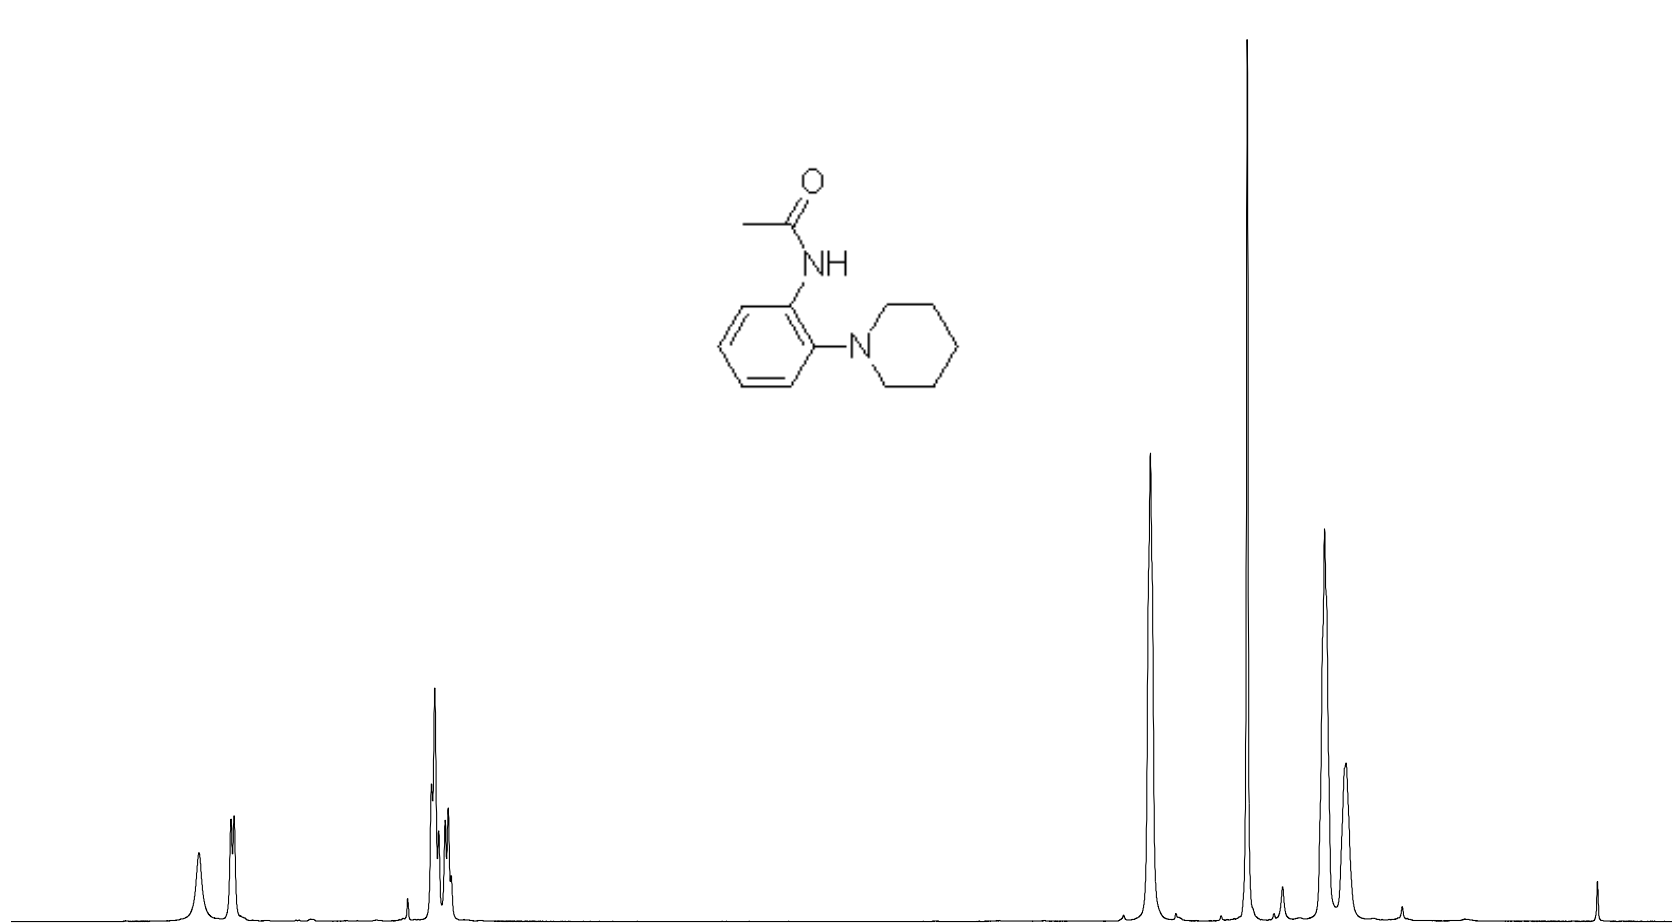

9.5 9.0 8.5 8.0 7.5 7.0 6.5 6.0 5.5 5.0 4.5 4.0 3.5 3.0 2.5 2.0 1.5 1.0 0.5 ppm

1.00  
1.06

2.17  
1.08

4.39

3.29

4.47  
2.24

Current Data Parameters  
NAME wdp  
EXPNO 274  
PROCNO 1

F2 - Acquisition Parameters  
Date\_ 20080812  
Time 10.27  
INSTRUM spect  
PROBHD 5 mm PABBO BB-  
PULPROG zg30  
TD 65536  
SOLVENT CDCl3  
NS 12  
DS 2  
SWH 8278.146 Hz  
FIDRES 0.126314 Hz  
AQ 3.9584243 sec  
RG 50.8  
DW 60.400 usec  
DE 6.00 usec  
TE 300.0 K  
D1 1.00000000 sec  
TDO 1

==== CHANNEL f1 =====  
NUC1 1H  
P1 13.60 usec  
PL1 0.00 dB  
SFO1 400.1324710 MHz

F2 - Processing parameters  
SI 32768  
SF 400.1300000 MHz  
WDW EM  
SSB 0  
LB 0.30 Hz  
GB 0  
PC 1.00





125287

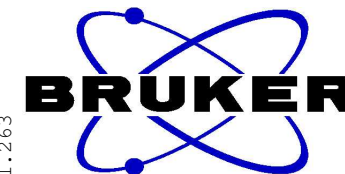

7.284  
7.142  
7.134  
7.129  
7.117  
7.112  
7.104  
6.556  
6.549  
6.527

3.606  
3.267  
3.258  
3.248  
3.242  
3.232  
3.223  
3.217  
3.207  
3.198  
2.084  
2.077  
2.065  
2.053  
2.045  
1.818  
1.809  
1.799  
1.785  
1.776  
1.767  
1.712  
1.703  
1.693  
1.681  
1.672  
1.662  
1.452  
1.443  
1.435  
1.422  
1.414  
1.382  
1.359  
1.351  
1.343  
1.309  
1.302  
1.293  
1.279  
1.272  
1.263

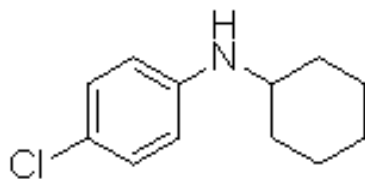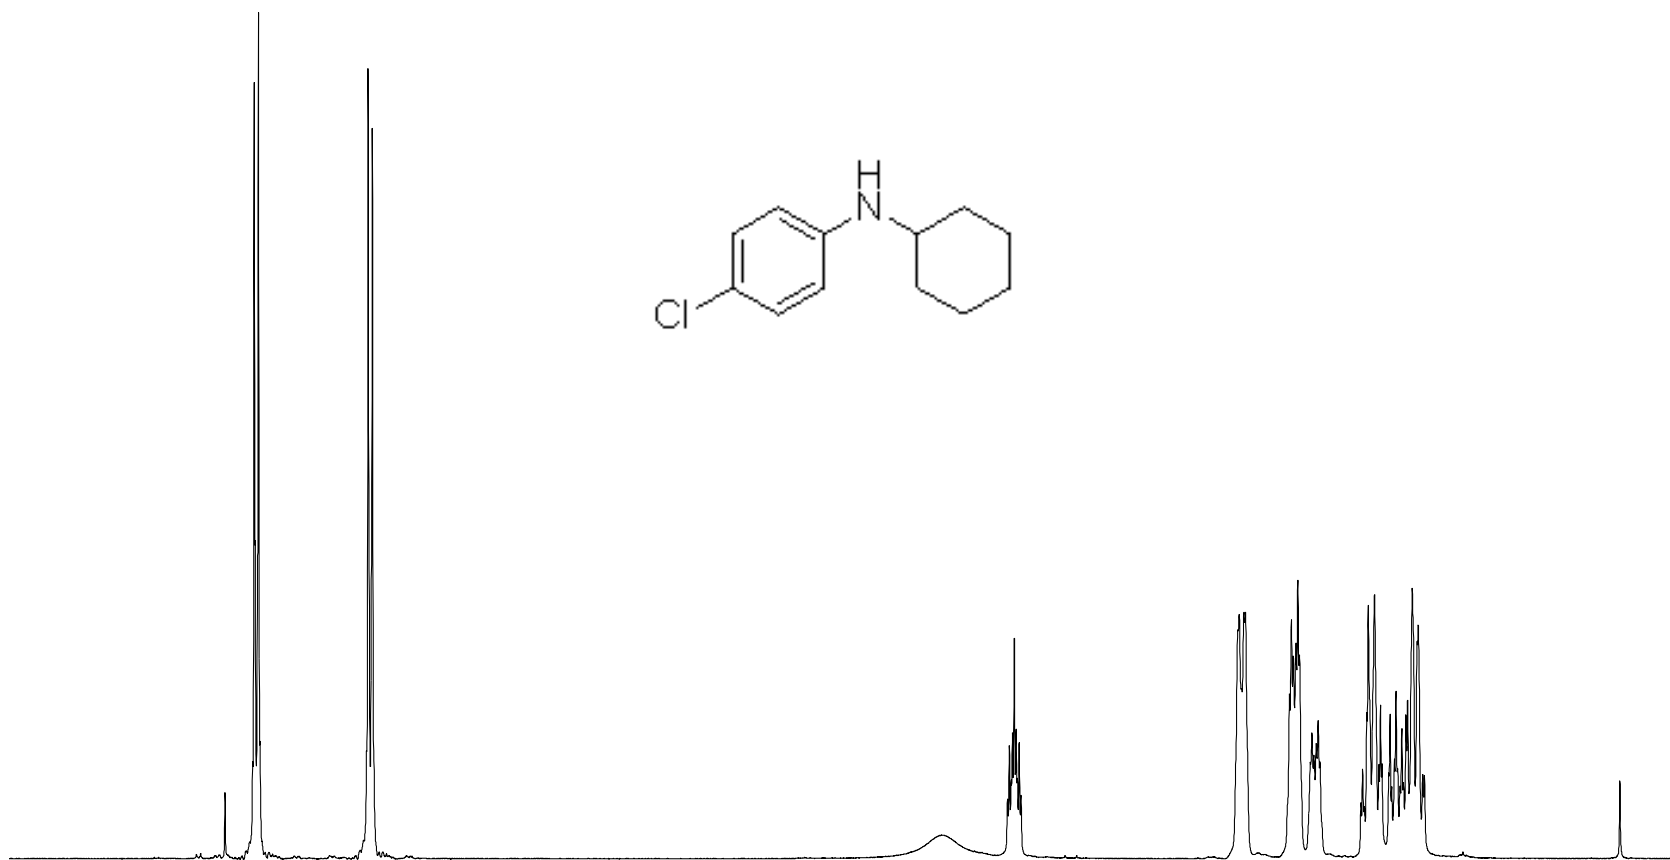

8.0 7.5 7.0 6.5 6.0 5.5 5.0 4.5 4.0 3.5 3.0 2.5 2.0 1.5 1.0 0.5 ppm

2.00

2.06

0.92

1.07

2.11

2.13

1.09

2.17

3.38

Current Data Parameters  
NAME wdp  
EXPNO 280  
PROCNO 1

F2 - Acquisition Parameters  
Date\_ 20080906  
Time 16.42  
INSTRUM spect  
PROBHD 5 mm PABBO BB-  
PULPROG zg30  
TD 65536  
SOLVENT CDCl3  
NS 7  
DS 2  
SWH 8278.146 Hz  
FIDRES 0.126314 Hz  
AQ 3.9584243 sec  
RG 50.8  
DW 60.400 usec  
DE 6.00 usec  
TE 303.0 K  
D1 1.00000000 sec  
TD0 1

==== CHANNEL f1 =====  
NUC1 1H  
P1 13.60 usec  
PL1 0.00 dB  
SFO1 400.1324710 MHz

F2 - Processing parameters  
SI 32768  
SF 400.1300000 MHz  
WDW EM  
SSB 0  
LB 0.30 Hz  
GB 0  
PC 1.00

125287

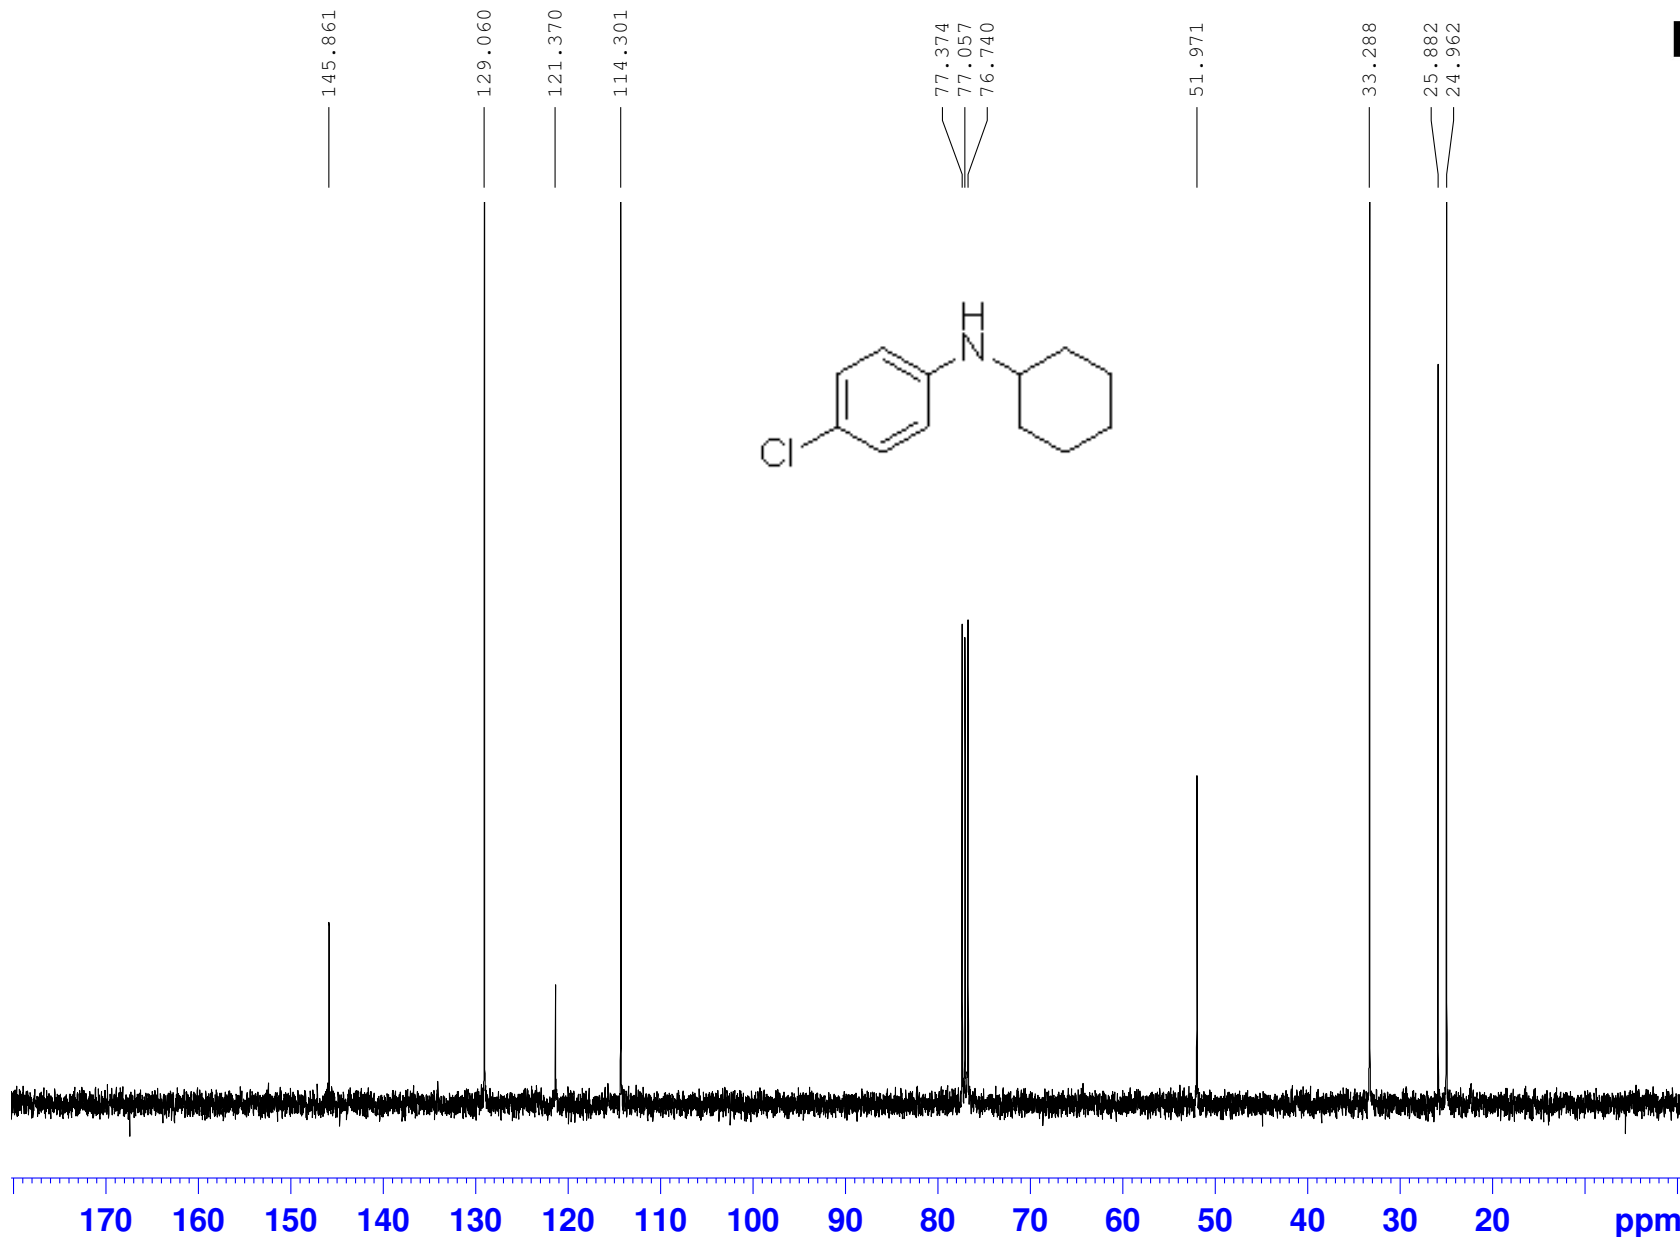

Current Data Parameters  
NAME wdp  
EXPNO 281  
PROCNO 1

F2 - Acquisition Parameters  
Date\_ 20080906  
Time 16.22  
INSTRUM spect  
PROBHD 5 mm PABBO BB-  
PULPROG zgpg30  
TD 65536  
SOLVENT CDCl3  
NS 83  
DS 4  
SWH 23980.814 Hz  
FIDRES 0.365918 Hz  
AQ 1.3664756 sec  
RG 812.7  
DW 20.850 usec  
DE 6.00 usec  
TE 303.0 K  
D1 2.00000000 sec  
d11 0.03000000 sec  
DELTA 1.89999998 sec  
TD0 1

==== CHANNEL f1 =====  
NUC1 13C  
P1 12.20 usec  
PL1 1.00 dB  
SFO1 100.6228298 MHz

==== CHANNEL f2 =====  
CPDPRG2 waltz16  
NUC2 1H  
PCPD2 80.00 usec  
PL2 0.00 dB  
PL12 15.39 dB  
PL13 15.50 dB  
SFO2 400.1316005 MHz

F2 - Processing parameters  
SI 32768  
SF 100.6127690 MHz  
WDW EM  
SSB 0  
LB 1.00 Hz  
GB 0  
PC 1.40

125288

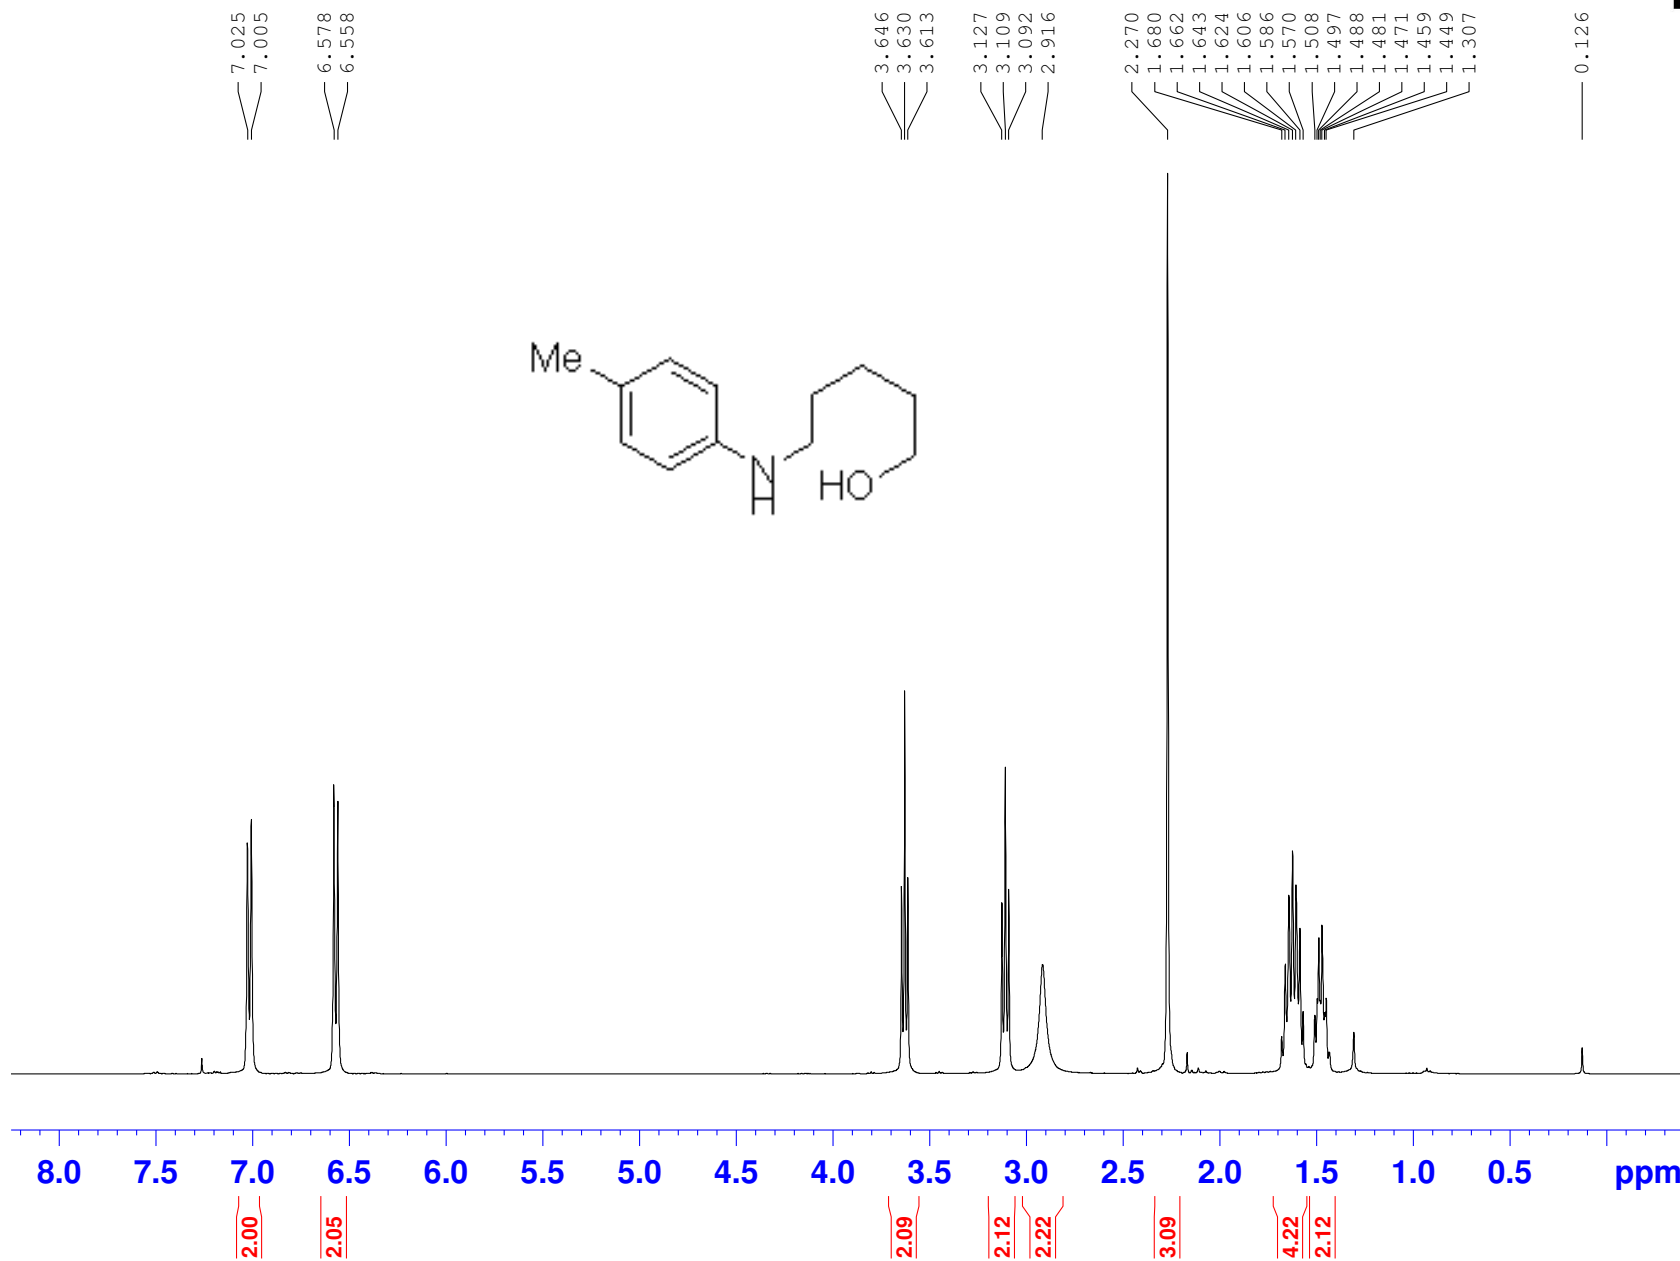

Current Data Parameters  
NAME wdp  
EXPNO 282  
PROCNO 1

F2 - Acquisition Parameters  
Date\_ 20080906  
Time 16.46  
INSTRUM spect  
PROBHD 5 mm PABBO BB-  
PULPROG zg30  
TD 65536  
SOLVENT CDCl3  
NS 16  
DS 2  
SWH 8278.146 Hz  
FIDRES 0.126314 Hz  
AQ 3.9584243 sec  
RG 28.5  
DW 60.400 usec  
DE 6.00 usec  
TE 302.9 K  
D1 1.00000000 sec  
TD0 1

==== CHANNEL f1 =====  
NUC1 1H  
P1 13.60 usec  
PL1 0.00 dB  
SFO1 400.1324710 MHz

F2 - Processing parameters  
SI 32768  
SF 400.1300089 MHz  
WDW EM  
SSB 0  
LB 0.30 Hz  
GB 0  
PC 1.00

125288

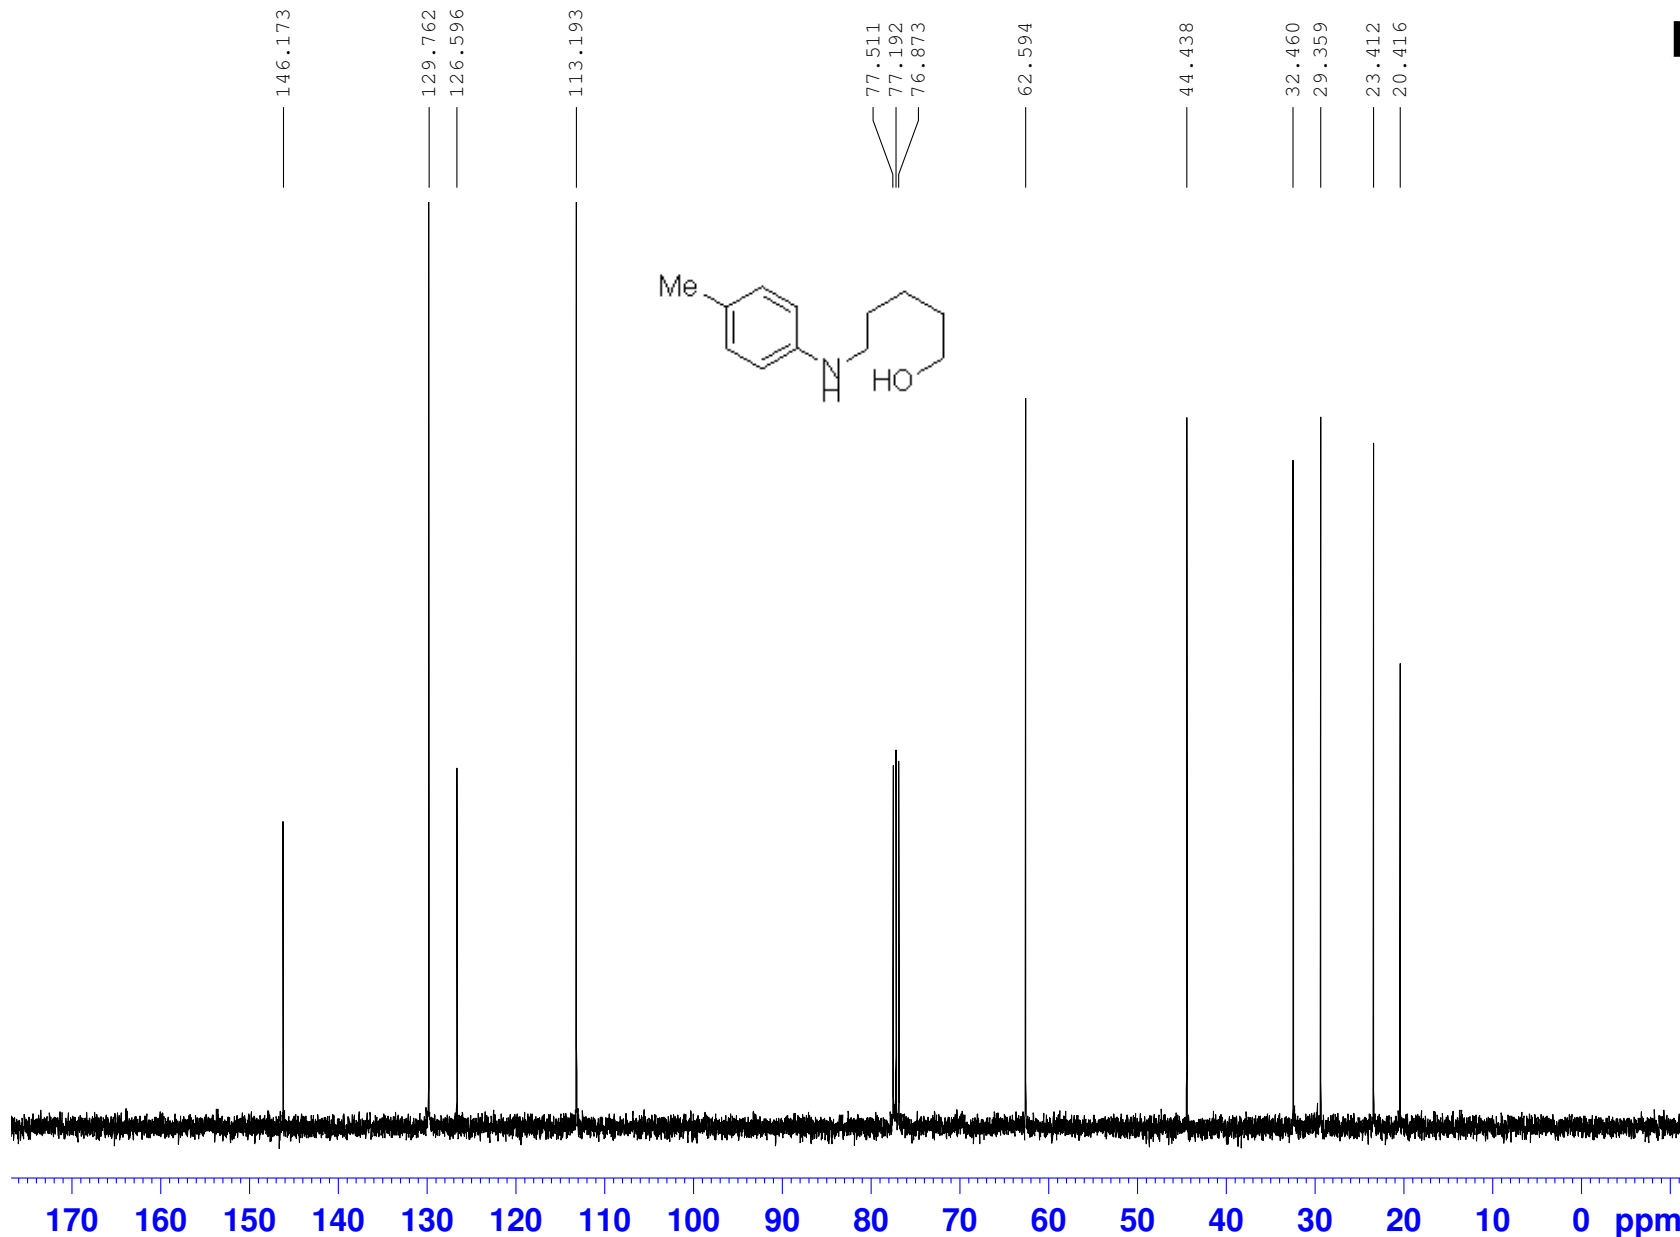

```
Current Data Parameters
NAME          wdp
EXPNO         283
PROCNO        1

F2 - Acquisition Parameters
Date_         20080906
Time          16.53
INSTRUM       spect
PROBHD        5 mm PABBO BB-
PULPROG       zgpg30
TD            65536
SOLVENT       CDCl3
NS            45
DS            4
SWH           23980.814 Hz
FIDRES        0.365918 Hz
AQ            1.3664756 sec
RG            724.1
DW            20.850 usec
DE            6.00 usec
TE            303.3 K
D1            2.00000000 sec
d11           0.03000000 sec
DELTA         1.89999998 sec
TD0           1

===== CHANNEL f1 =====
NUC1          13C
P1            12.20 usec
PL1           1.00 dB
SFO1          100.6228298 MHz

===== CHANNEL f2 =====
CPDPRG2       waltz16
NUC2          1H
PCPD2         80.00 usec
PL2           0.00 dB
PL12          15.39 dB
PL13          15.50 dB
SFO2          400.1316005 MHz

F2 - Processing parameters
SI            32768
SF            100.6127690 MHz
WDW           EM
SSB           0
LB            1.00 Hz
GB            0
PC            1.40
```

125289

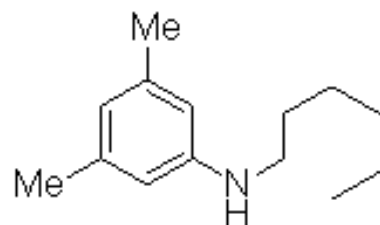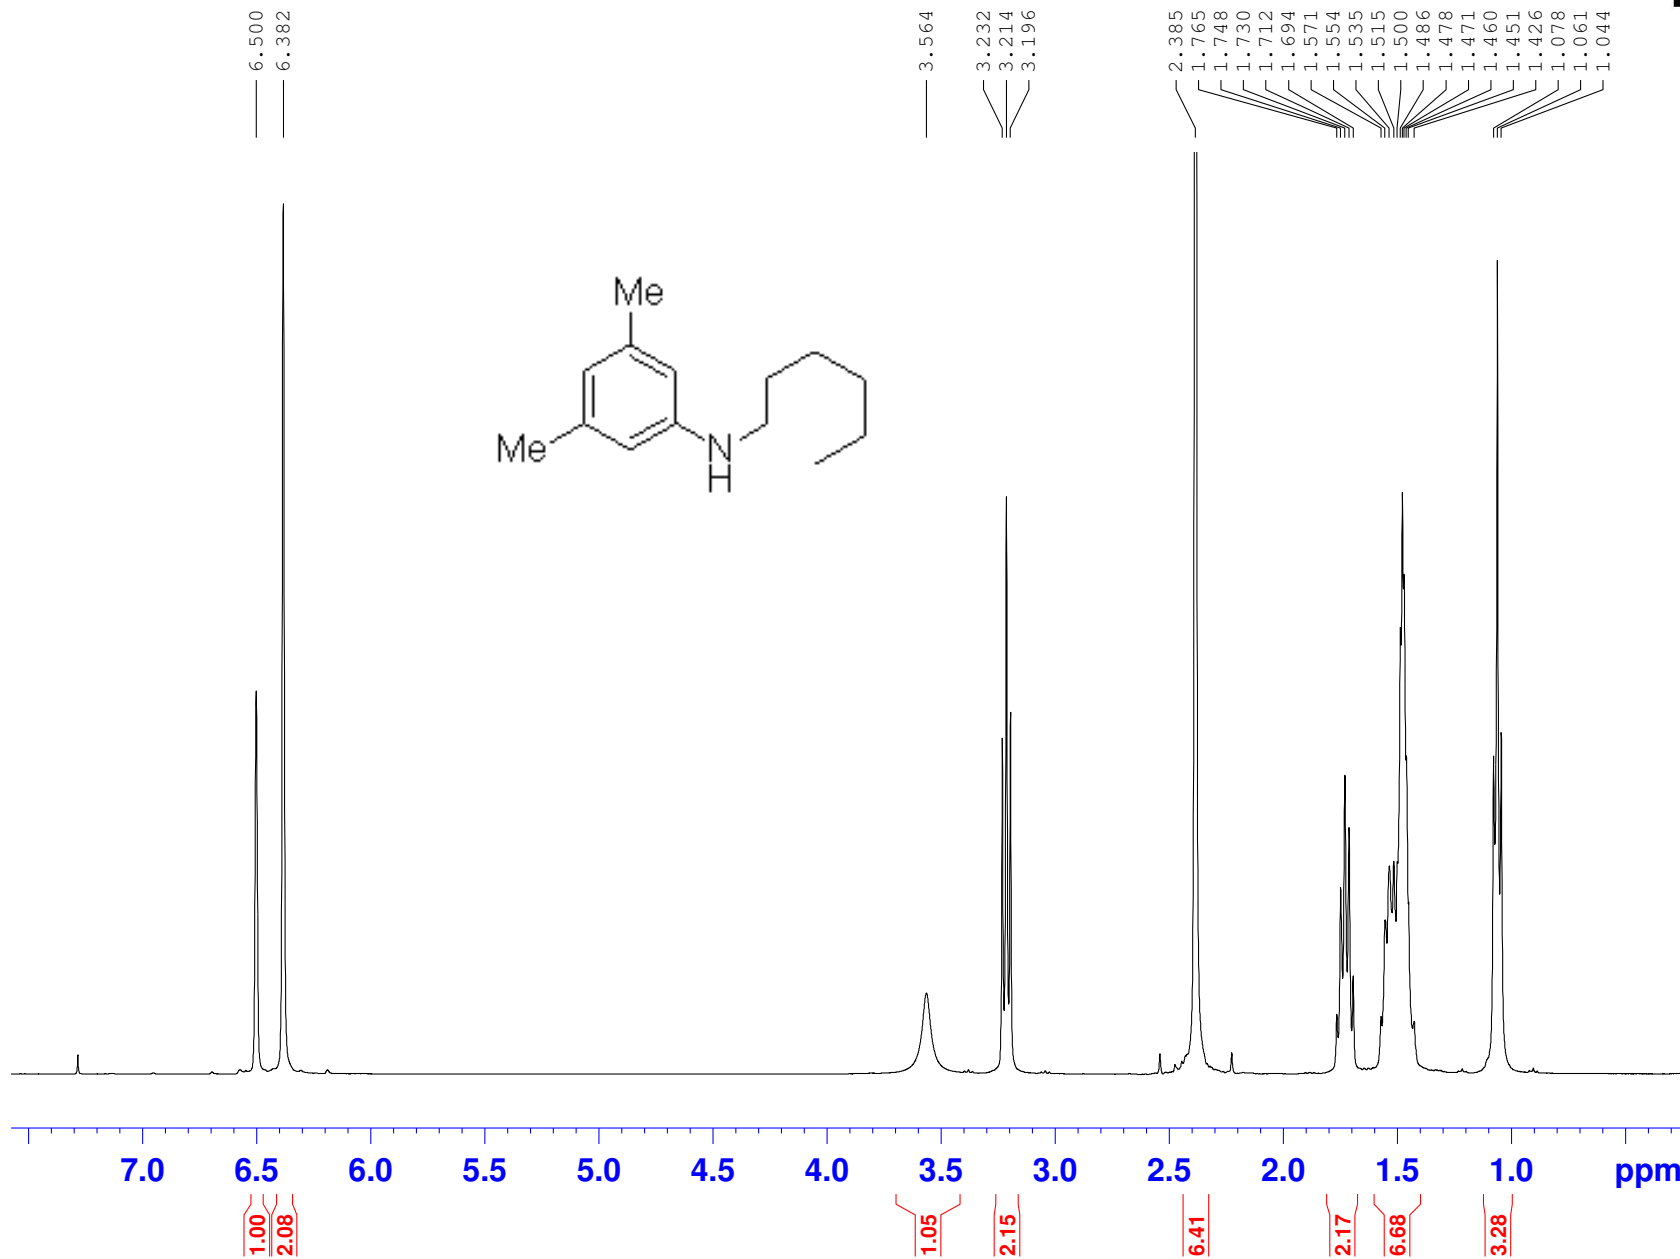

Current Data Parameters  
NAME wdp  
EXPNO 284  
PROCNO 1

F2 - Acquisition Parameters  
Date\_ 20080906  
Time 16.59  
INSTRUM spect  
PROBHD 5 mm PABBO BB-  
PULPROG zg30  
TD 65536  
SOLVENT CDCl3  
NS 16  
DS 2  
SWH 8278.146 Hz  
FIDRES 0.126314 Hz  
AQ 3.9584243 sec  
RG 18  
DW 60.400 usec  
DE 6.00 usec  
TE 302.9 K  
D1 1.00000000 sec  
TD0 1

==== CHANNEL f1 =====  
NUC1 1H  
P1 13.60 usec  
PL1 0.00 dB  
SFO1 400.1324710 MHz

F2 - Processing parameters  
SI 32768  
SF 400.1300000 MHz  
WDW EM  
SSB 0  
LB 0.30 Hz  
GB 0  
PC 1.00

125289

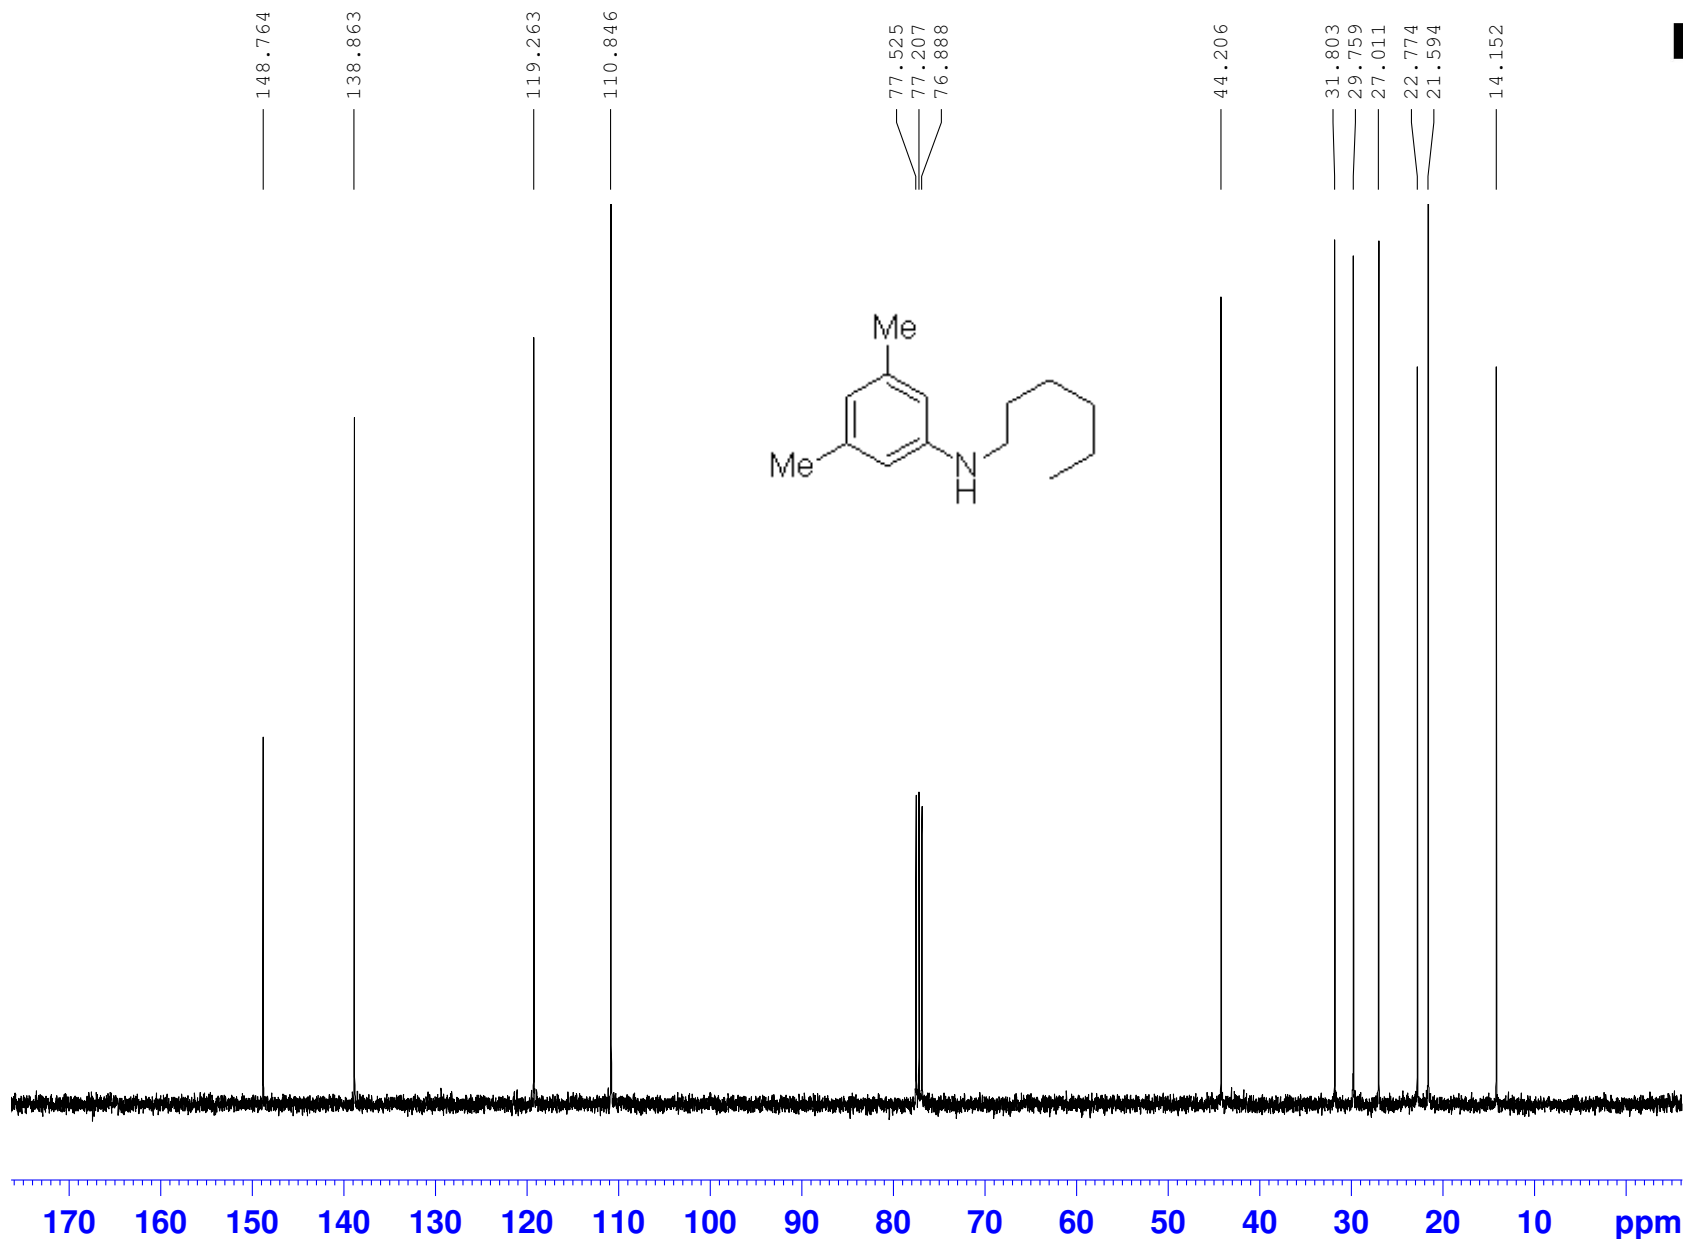

Current Data Parameters  
NAME wdp  
EXPNO 285  
PROCNO 1

F2 - Acquisition Parameters  
Date\_ 20080906  
Time 17.07  
INSTRUM spect  
PROBHD 5 mm PABBO BB-  
PULPROG zgpg30  
TD 65536  
SOLVENT CDCl3  
NS 44  
DS 4  
SWH 23980.814 Hz  
FIDRES 0.365918 Hz  
AQ 1.3664756 sec  
RG 1024  
DW 20.850 usec  
DE 6.00 usec  
TE 303.4 K  
D1 2.00000000 sec  
d11 0.03000000 sec  
DELTA 1.89999998 sec  
TD0 1

==== CHANNEL f1 =====  
NUC1 13C  
P1 12.20 usec  
PL1 1.00 dB  
SFO1 100.6228298 MHz

==== CHANNEL f2 =====  
CPDPRG2 waltz16  
NUC2 1H  
PCPD2 80.00 usec  
PL2 0.00 dB  
PL12 15.39 dB  
PL13 15.50 dB  
SFO2 400.1316005 MHz

F2 - Processing parameters  
SI 32768  
SF 100.6127690 MHz  
WDW EM  
SSB 0  
LB 1.00 Hz  
GB 0  
PC 1.40

125290

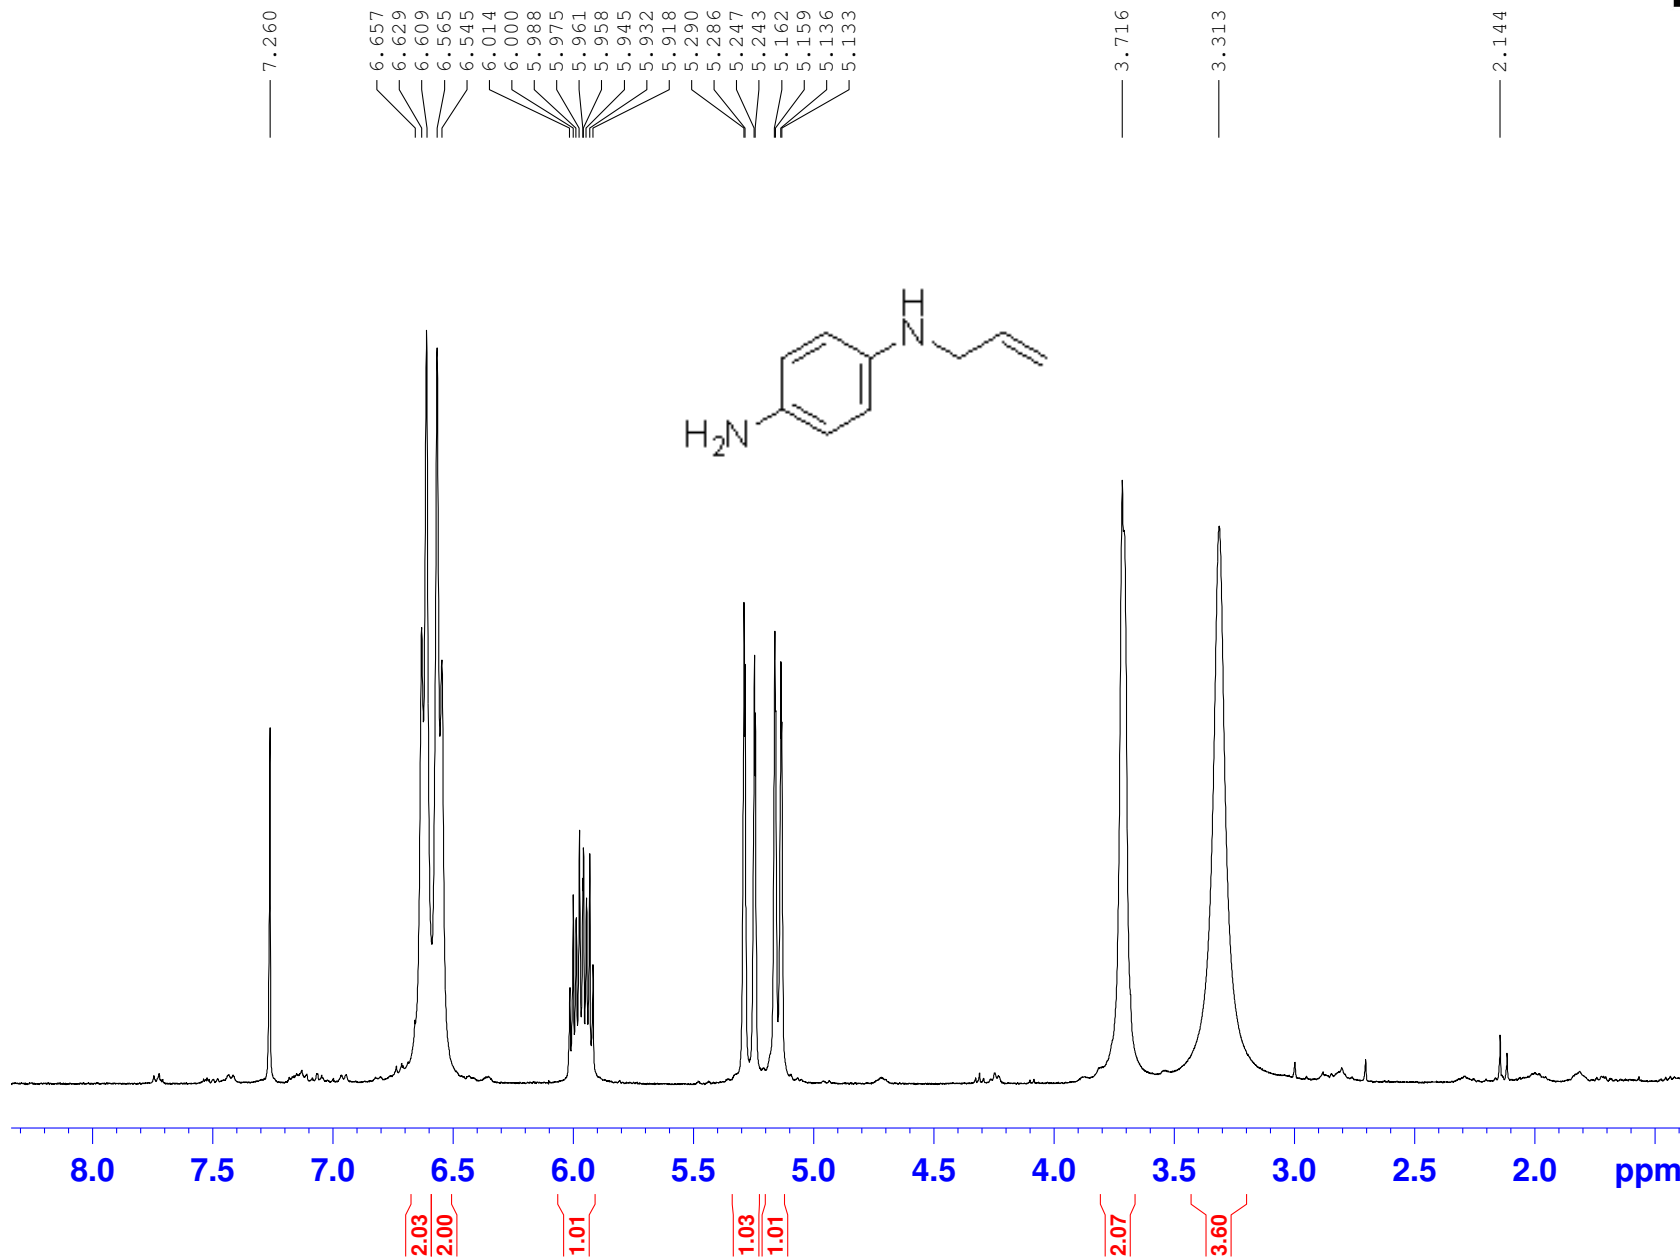

Current Data Parameters  
NAME wdp  
EXPNO 286  
PROCNO 1

F2 - Acquisition Parameters  
Date\_ 20080906  
Time 18.37  
INSTRUM spect  
PROBHD 5 mm PABBO BB-  
PULPROG zg30  
TD 65536  
SOLVENT CDCl3  
NS 12  
DS 2  
SWH 8278.146 Hz  
FIDRES 0.126314 Hz  
AQ 3.9584243 sec  
RG 181  
DW 60.400 usec  
DE 6.00 usec  
TE 301.8 K  
D1 1.00000000 sec  
TD0 1

==== CHANNEL f1 =====  
NUC1 1H  
P1 13.60 usec  
PL1 0.00 dB  
SFO1 400.1324710 MHz

F2 - Processing parameters  
SI 32768  
SF 400.130085 MHz  
WDW EM  
SSB 0  
LB 0.30 Hz  
GB 0  
PC 1.00



125290

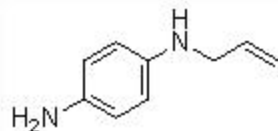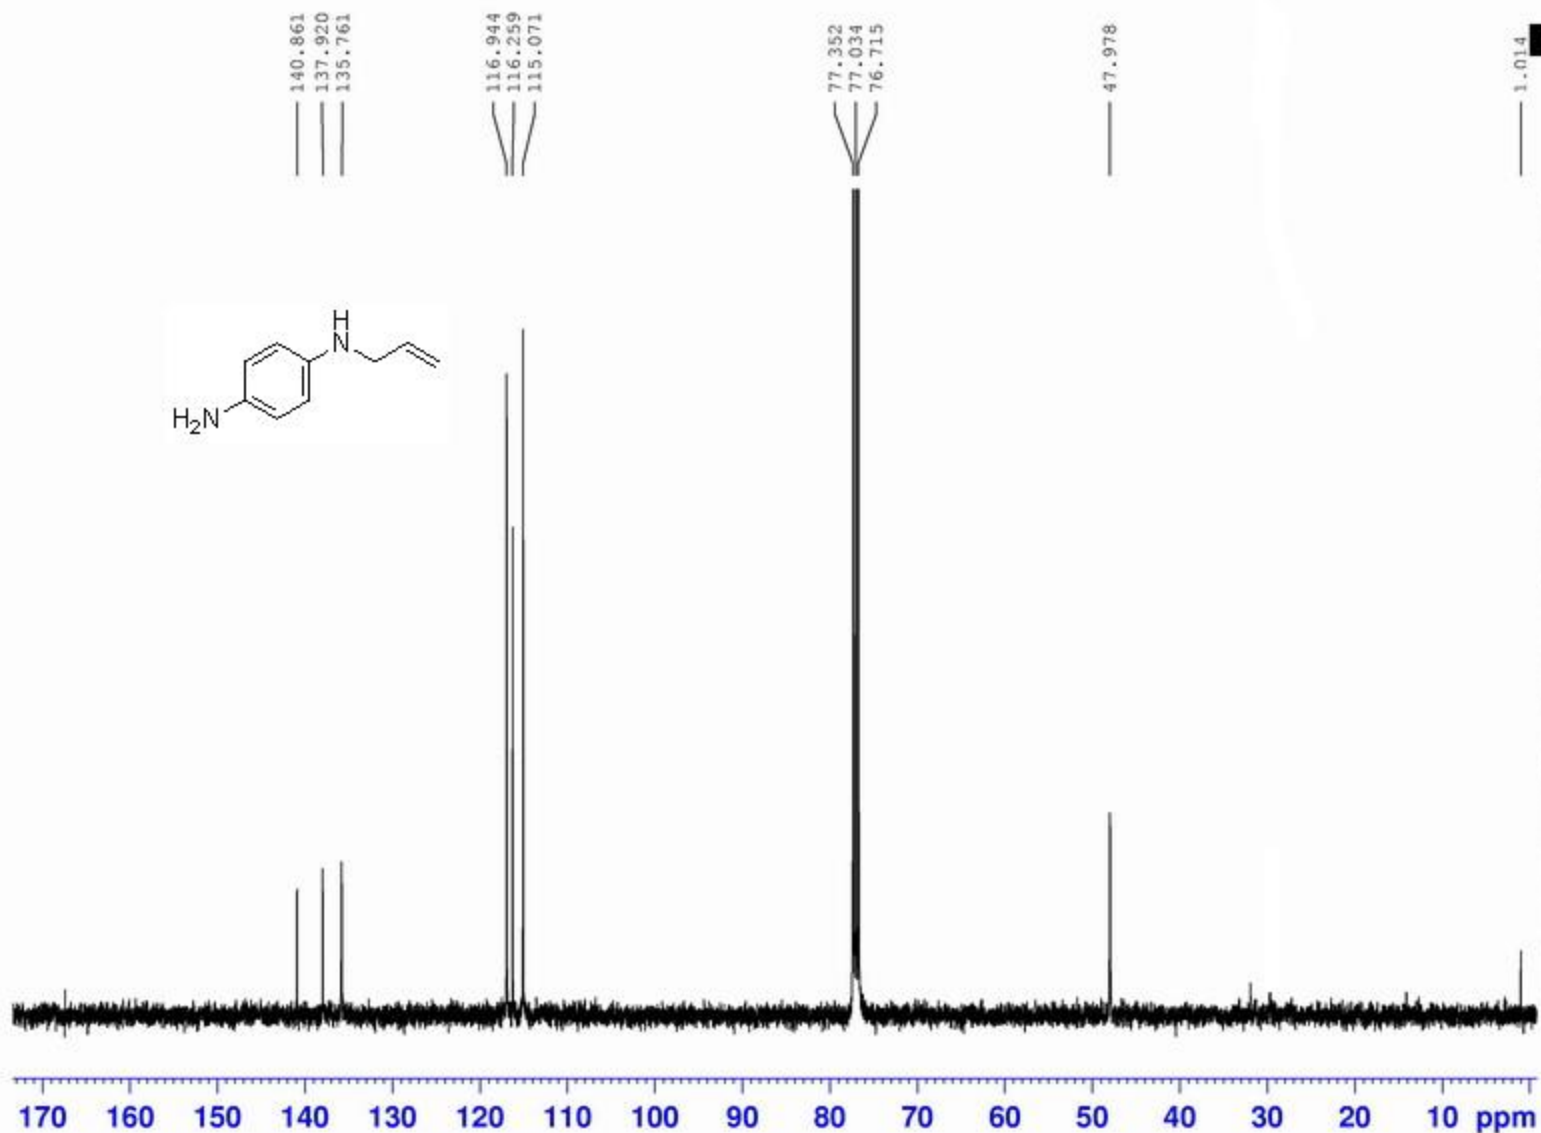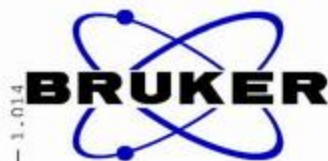

Current Data Parameters  
 NAME wdp  
 EXPNO 287  
 PROCNO 1

F2 - Acquisition Parameters  
 Date\_ 20080906  
 Time 17.18  
 INSTRUM spect  
 PROBHD 5 mm PABBO BB-  
 PULPROG zgpg30  
 TD 65536  
 SOLVENT CDCl3  
 NS 1024  
 DS 4  
 SWH 23980.814 Hz  
 FIDRES 0.365918 Hz  
 AQ 1.3664756 sec  
 RG 912.3  
 DW 20.850 usec  
 DE 6.00 usec  
 TE 303.2 K  
 D1 2.00000000 sec  
 d11 0.03000000 sec  
 DELTA 1.89999998 sec  
 TDO 1

----- CHANNEL f1 -----  
 NUC1 13C  
 P1 12.20 usec  
 PL1 1.00 dB  
 SFO1 100.6228298 MHz

----- CHANNEL f2 -----  
 CPDPRG2 waltz16  
 NUC2 1H  
 PCPD2 80.00 usec  
 PL2 0.00 dB  
 PL12 15.39 dB  
 PL13 15.50 dB  
 SFO2 400.1316005 MHz

F2 - Processing parameters  
 SI 32768  
 SF 100.6127690 MHz  
 WDW EM  
 SSB 0  
 LB 1.00 Hz  
 CB 0  
 PC 1.40

125291

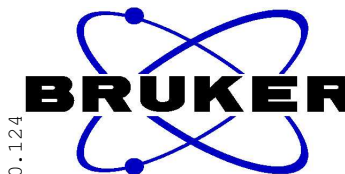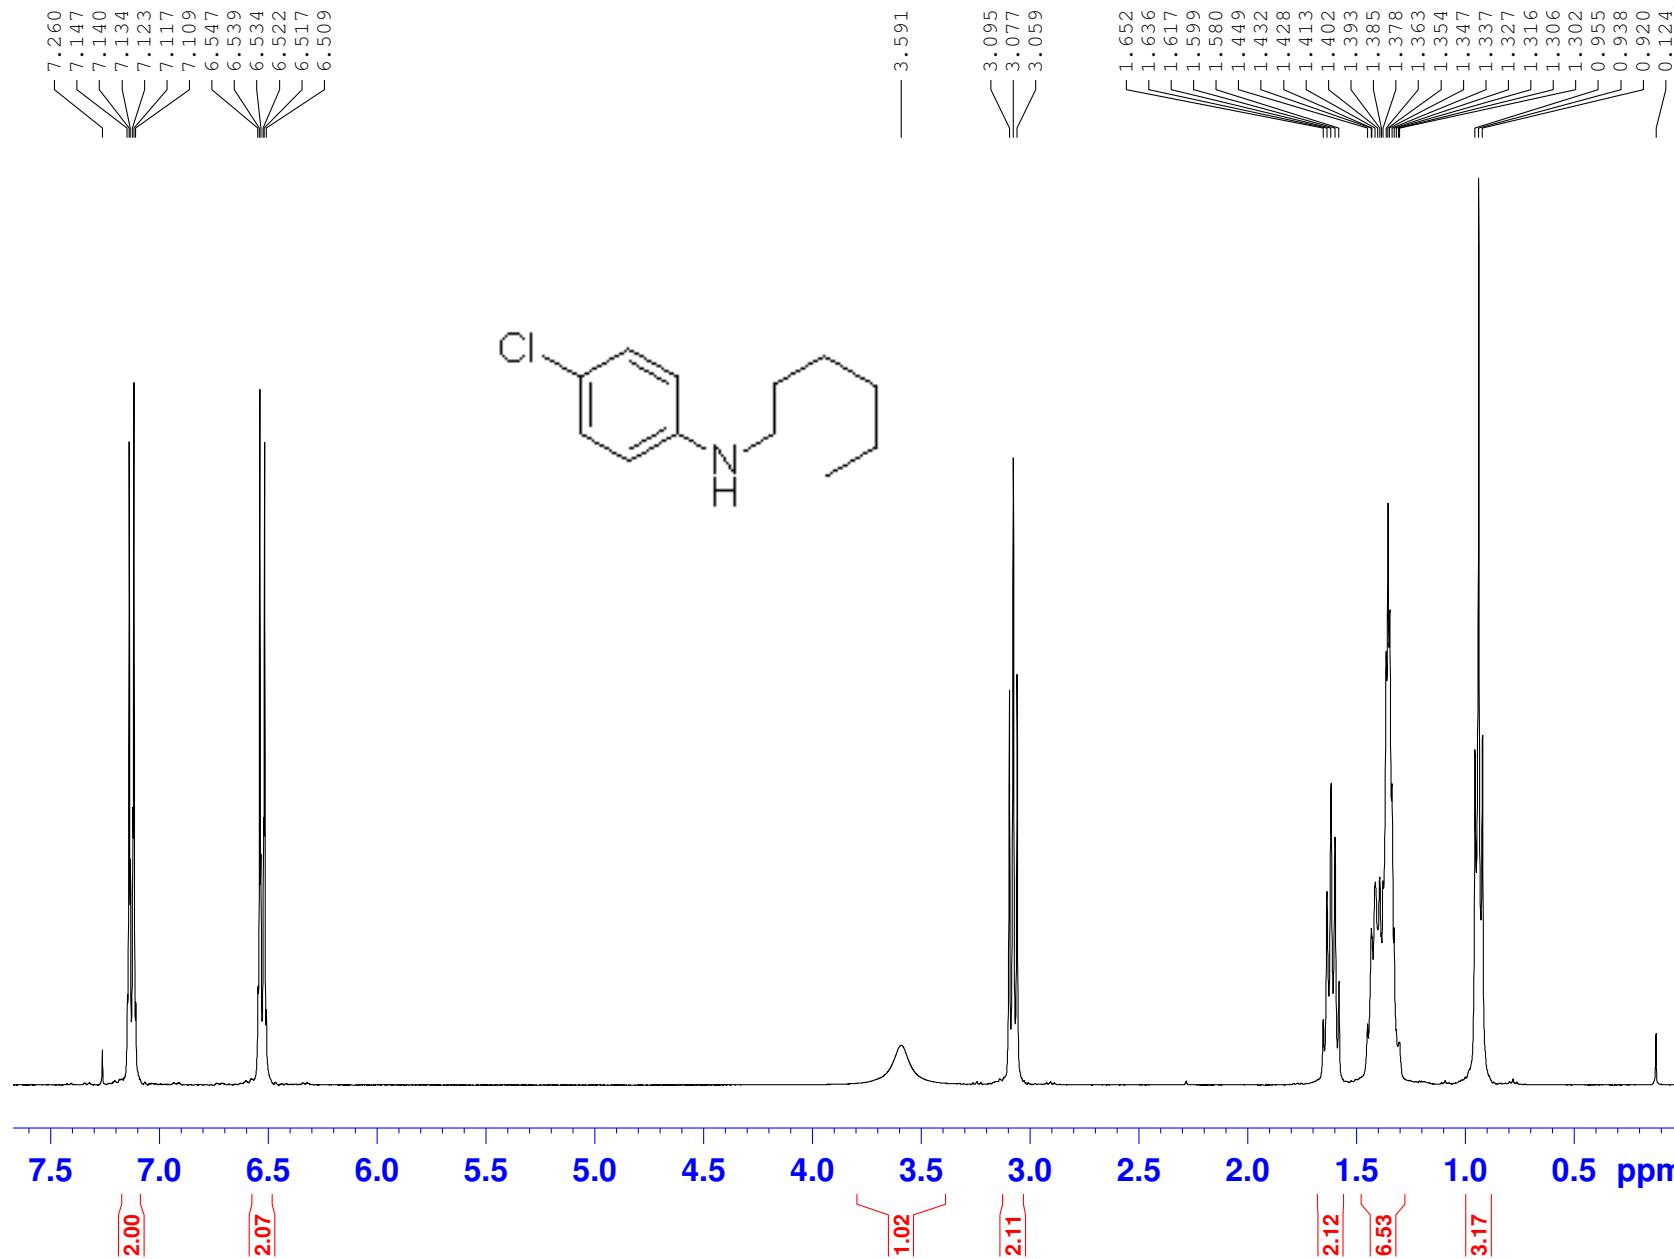

Current Data Parameters  
NAME wdp  
EXPNO 288  
PROCNO 1

F2 - Acquisition Parameters  
Date\_ 20080906  
Time 18.26  
INSTRUM spect  
PROBHD 5 mm PABBO BB-  
PULPROG zg30  
TD 65536  
SOLVENT CDCl3  
NS 7  
DS 2  
SWH 8278.146 Hz  
FIDRES 0.126314 Hz  
AQ 3.9584243 sec  
RG 32  
DW 60.400 usec  
DE 6.00 usec  
TE 302.9 K  
D1 1.00000000 sec  
TD0 1

==== CHANNEL f1 =====  
NUC1 1H  
P1 13.60 usec  
PL1 0.00 dB  
SFO1 400.1324710 MHz

F2 - Processing parameters  
SI 32768  
SF 400.1300090 MHz  
WDW EM  
SSB 0  
LB 0.30 Hz  
GB 0  
PC 1.00

125291

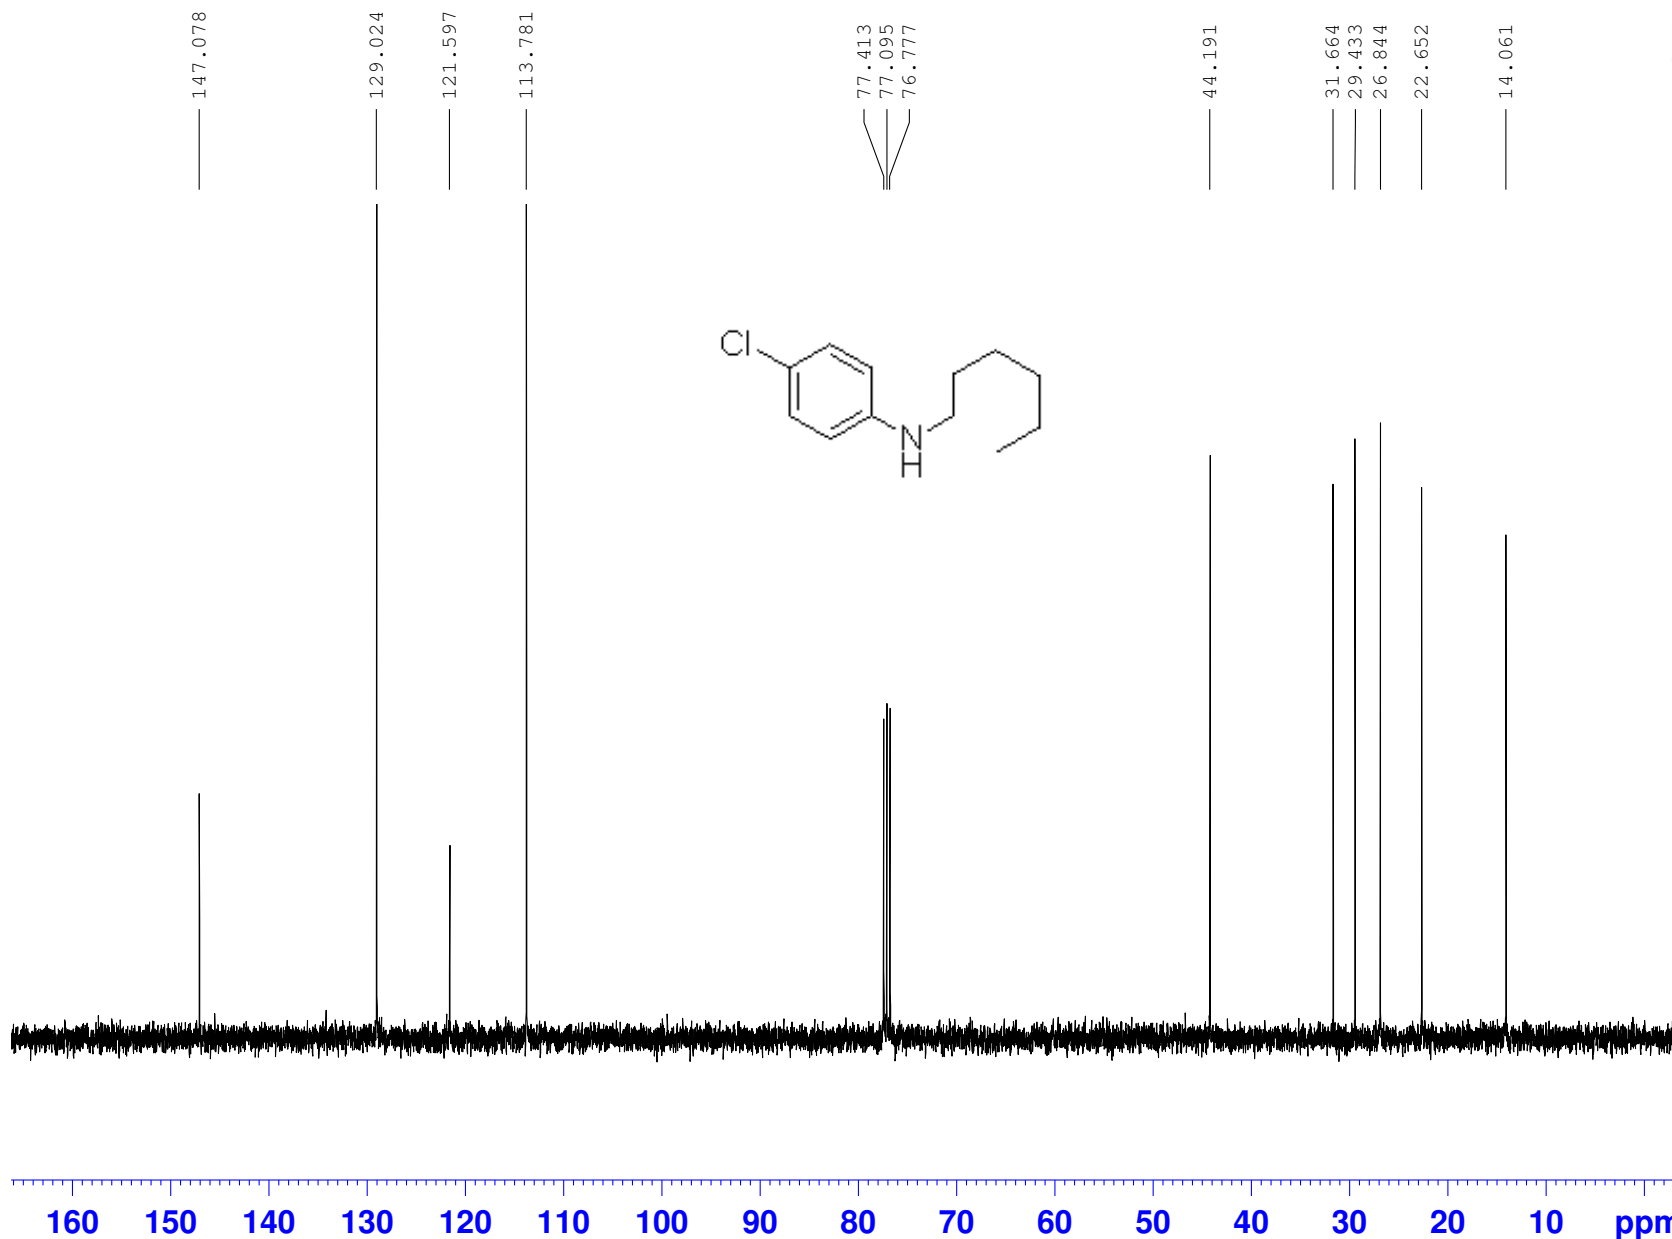

Current Data Parameters  
NAME wdp  
EXPNO 289  
PROCNO 1

F2 - Acquisition Parameters  
Date\_ 20080906  
Time 18.33  
INSTRUM spect  
PROBHD 5 mm PABBO BB-  
PULPROG zgpg30  
TD 65536  
SOLVENT CDCl3  
NS 18  
DS 4  
SWH 23980.814 Hz  
FIDRES 0.365918 Hz  
AQ 1.3664756 sec  
RG 912.3  
DW 20.850 usec  
DE 6.00 usec  
TE 302.4 K  
D1 2.00000000 sec  
d11 0.03000000 sec  
DELTA 1.89999998 sec  
TD0 1

==== CHANNEL f1 =====  
NUC1 13C  
P1 12.20 usec  
PL1 1.00 dB  
SFO1 100.6228298 MHz

==== CHANNEL f2 =====  
CPDPRG2 waltz16  
NUC2 1H  
PCPD2 80.00 usec  
PL2 0.00 dB  
PL12 15.39 dB  
PL13 15.50 dB  
SFO2 400.1316005 MHz

F2 - Processing parameters  
SI 32768  
SF 100.6127690 MHz  
WDW EM  
SSB 0  
LB 1.00 Hz  
GB 0  
PC 1.40

125292

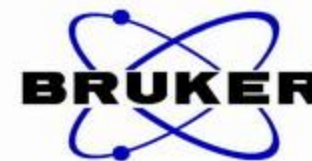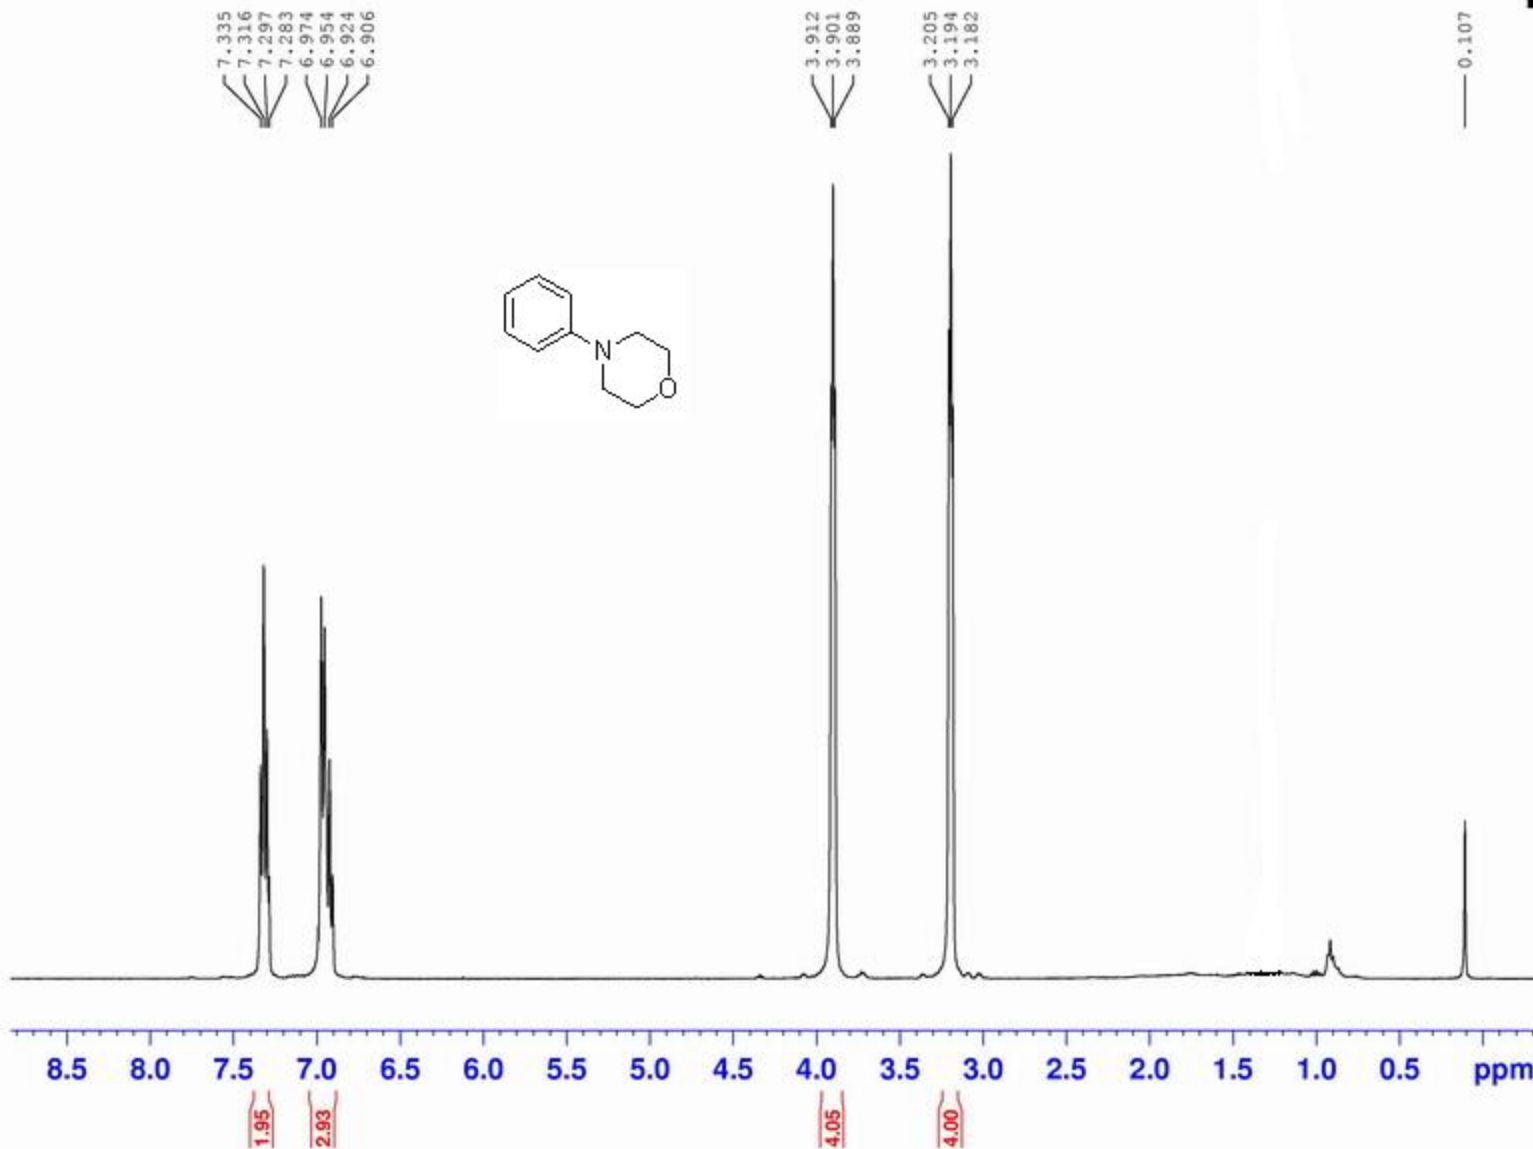

Current Data Parameters  
NAME wdp  
EXPNO 290  
PROCNO 1

F2 - Acquisition Parameters  
Date\_ 20080906  
Time 18.52  
INSTRUM spect  
PROBHD 5 mm PABBO BB-  
PULPROG zg30  
TD 65536  
SOLVENT CDCl3  
NS 16  
DS 2  
SWH 8278.146 Hz  
FIDRES 0.126314 Hz  
AQ 3.9584243 sec  
RG 143.7  
DW 60.400 usec  
DE 6.00 usec  
TE 301.2 K  
D1 1.00000000 sec  
TD0 1

----- CHANNEL f1 -----  
NUC1 1H  
P1 13.60 usec  
PL1 0.00 dB  
SFO1 400.1324710 MHz

F2 - Processing parameters  
SI 32768  
SF 400.1300000 MHz  
WDW EM  
SSB 0  
LB 0.30 Hz  
GB 0  
PC 1.00

125292

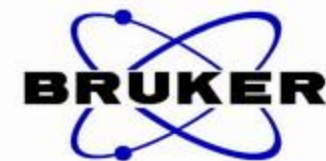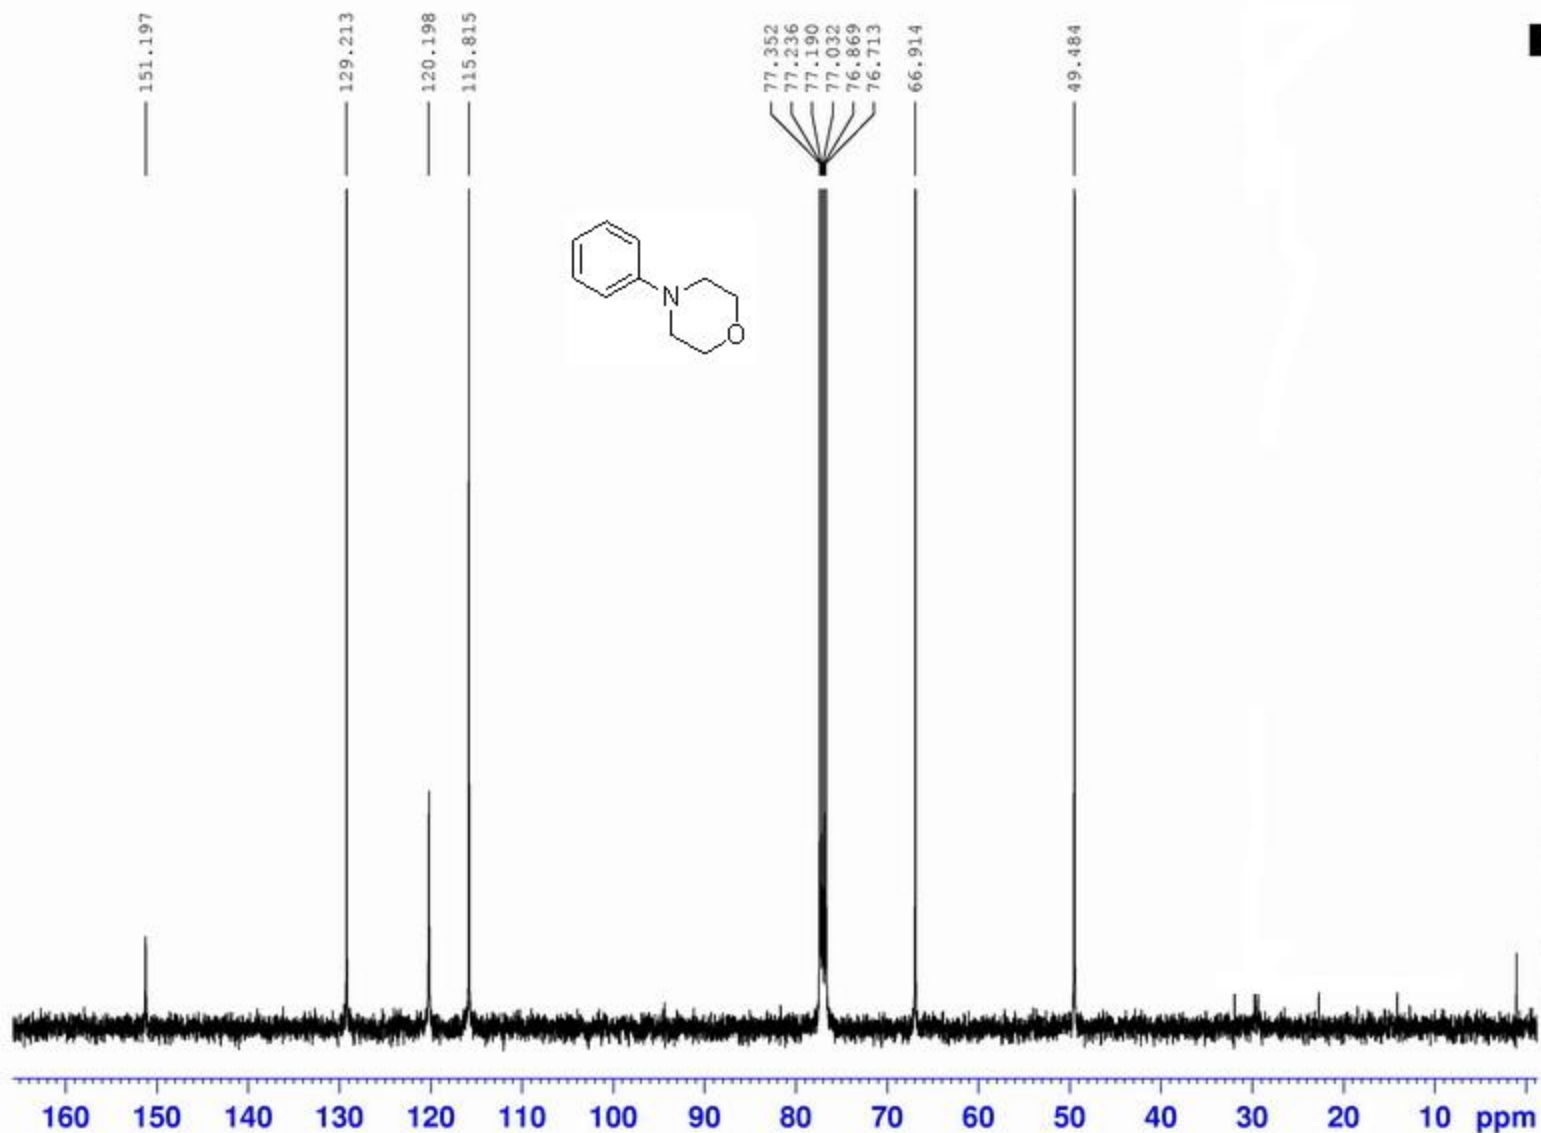

Current Data Parameters  
 NAME wdp  
 EXPNO 291  
 PROCNO 1

F2 - Acquisition Parameters  
 Date\_ 20080906  
 Time 18.59  
 INSTRUM spect  
 PROBHD 5 mm PABBO BB-  
 PULPROG zgpg30  
 TD 65536  
 SOLVENT CDCl3  
 NS 1024  
 DS 4  
 SWH 23980.814 Hz  
 FIDRES 0.365918 Hz  
 AQ 1.3664756 sec  
 RG 1024  
 DW 20.850 usec  
 DE 6.00 usec  
 TE 301.7 K  
 D1 2.0000000 sec  
 d11 0.0300000 sec  
 DELTA 1.89999998 sec  
 TDO 1

----- CHANNEL f1 -----  
 NUC1 13C  
 P1 12.20 usec  
 PL1 1.00 dB  
 SFO1 100.6228298 MHz

----- CHANNEL f2 -----  
 CPDPRG2 waltz16  
 NUC2 1H  
 PCPD2 80.00 usec  
 PL2 0.00 dB  
 PL12 15.39 dB  
 PL13 15.50 dB  
 SFO2 400.1316005 MHz

F2 - Processing parameters  
 SI 32768  
 SF 100.6127690 MHz  
 WDW EM  
 SSB 0  
 LB 1.00 Hz  
 CB 0  
 PC 1.40

125293



7.051  
7.031

6.624  
6.603

3.806  
3.793  
3.780

3.428  
3.268  
3.255  
3.242

2.299

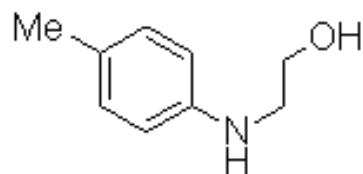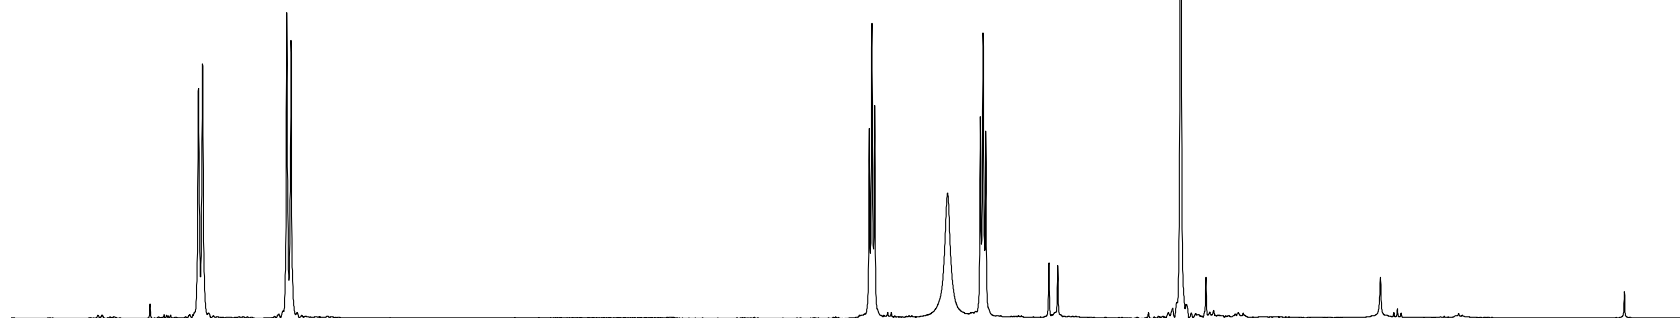

Current Data Parameters  
NAME wdp  
EXPNO 293  
PROCNO 1

F2 - Acquisition Parameters  
Date\_ 20080906  
Time 21.17  
INSTRUM spect  
PROBHD 5 mm PABBO BB-  
PULPROG zg30  
TD 65536  
SOLVENT CDCl3  
NS 6  
DS 2  
SWH 8278.146 Hz  
FIDRES 0.126314 Hz  
AQ 3.9584243 sec  
RG 32  
DW 60.400 usec  
DE 6.00 usec  
TE 302.7 K  
D1 1.0000000 sec  
TD0 1

==== CHANNEL f1 =====  
NUC1 1H  
P1 13.60 usec  
PL1 0.00 dB  
SFO1 400.1324710 MHz

F2 - Processing parameters  
SI 32768  
SF 400.1300000 MHz  
WDW EM  
SSB 0  
LB 0.30 Hz  
GB 0  
PC 1.00

7.5 7.0 6.5 6.0 5.5 5.0 4.5 4.0 3.5 3.0 2.5 2.0 1.5 1.0 0.5 ppm

1.99

2.06

2.07

2.16

2.13

3.10

125293

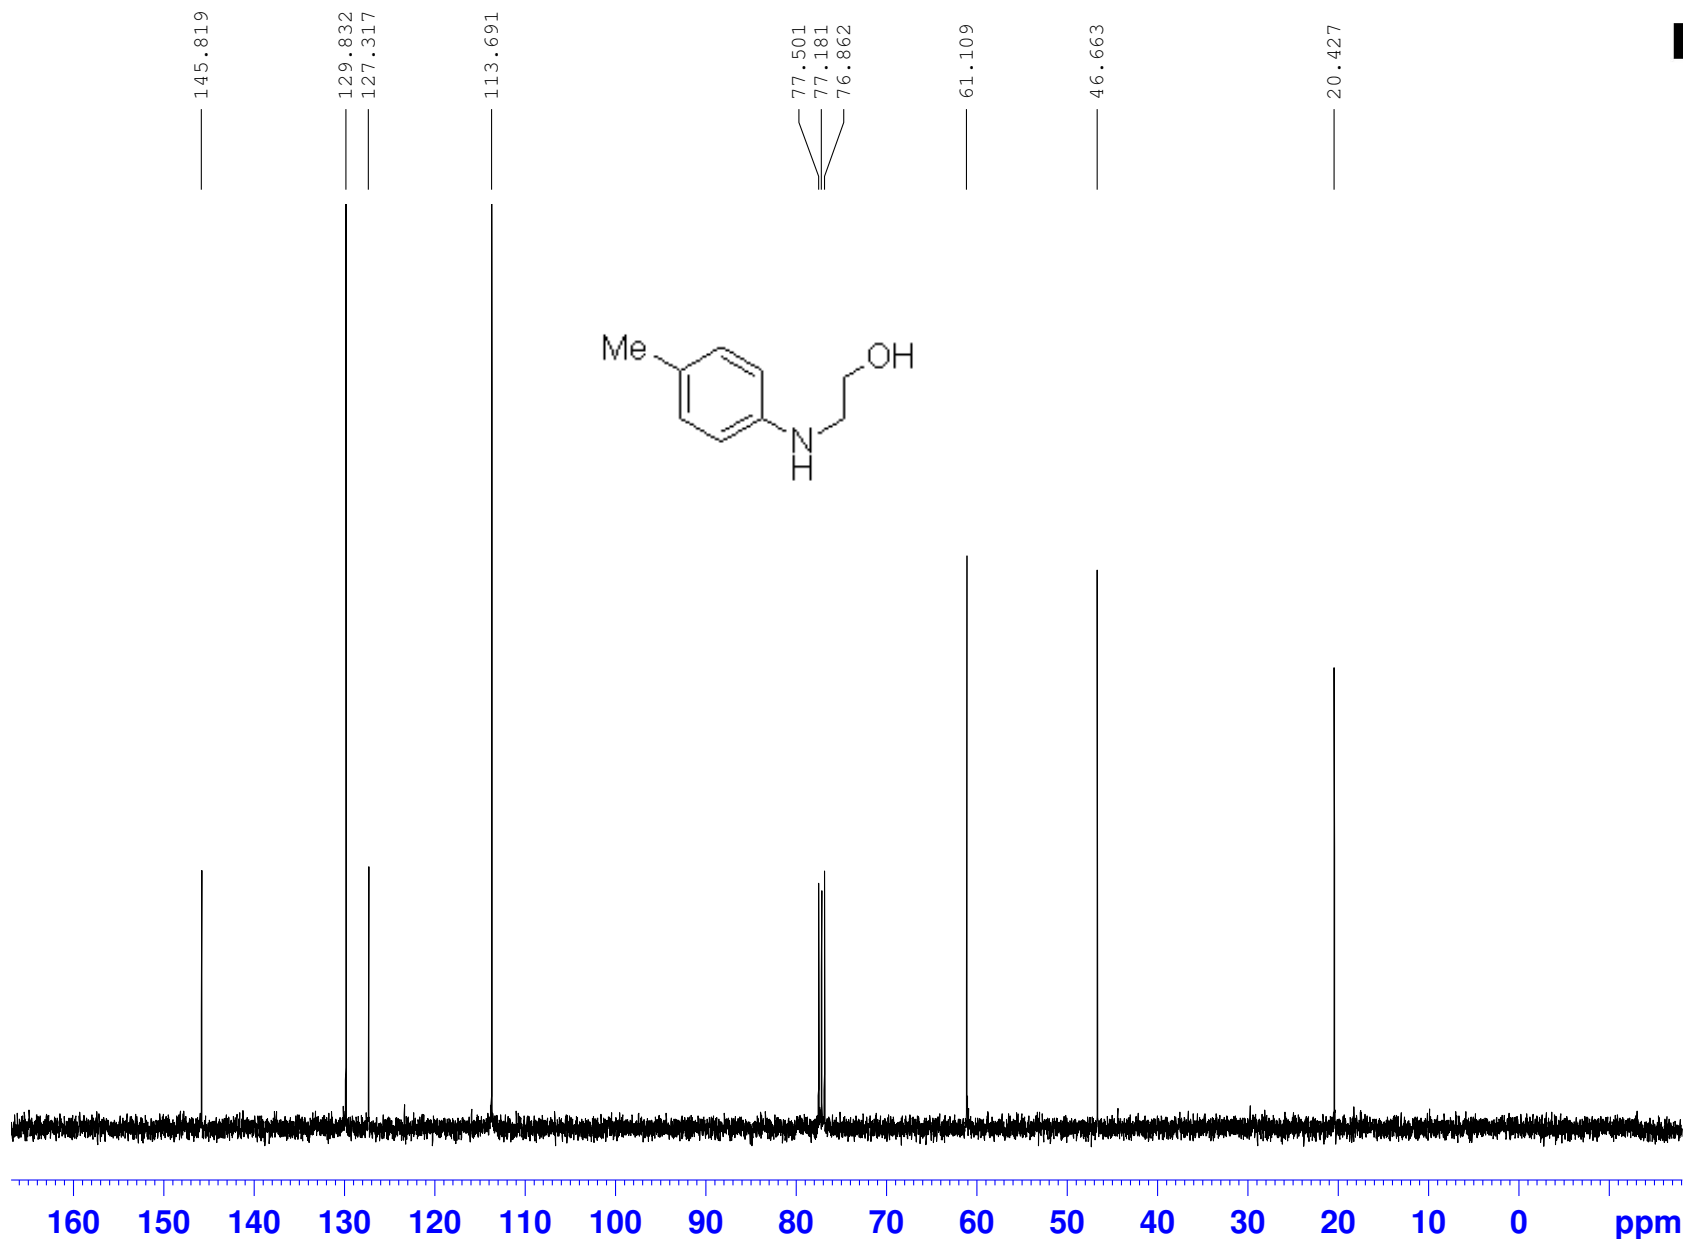

Current Data Parameters  
NAME wdp  
EXPNO 292  
PROCNO 1

F2 - Acquisition Parameters  
Date\_ 20080906  
Time 21.12  
INSTRUM spect  
PROBHD 5 mm PABBO BB-  
PULPROG zgpg30  
TD 65536  
SOLVENT CDCl3  
NS 16  
DS 4  
SWH 23980.814 Hz  
FIDRES 0.365918 Hz  
AQ 1.3664756 sec  
RG 812.7  
DW 20.850 usec  
DE 6.00 usec  
TE 303.0 K  
D1 2.00000000 sec  
d11 0.03000000 sec  
DELTA 1.89999998 sec  
TD0 1

==== CHANNEL f1 =====  
NUC1 13C  
P1 12.20 usec  
PL1 1.00 dB  
SFO1 100.6228298 MHz

==== CHANNEL f2 =====  
CPDPRG2 waltz16  
NUC2 1H  
PCPD2 80.00 usec  
PL2 0.00 dB  
PL12 15.39 dB  
PL13 15.50 dB  
SFO2 400.1316005 MHz

F2 - Processing parameters  
SI 32768  
SF 100.6127690 MHz  
WDW EM  
SSB 0  
LB 1.00 Hz  
GB 0  
PC 1.40

125318

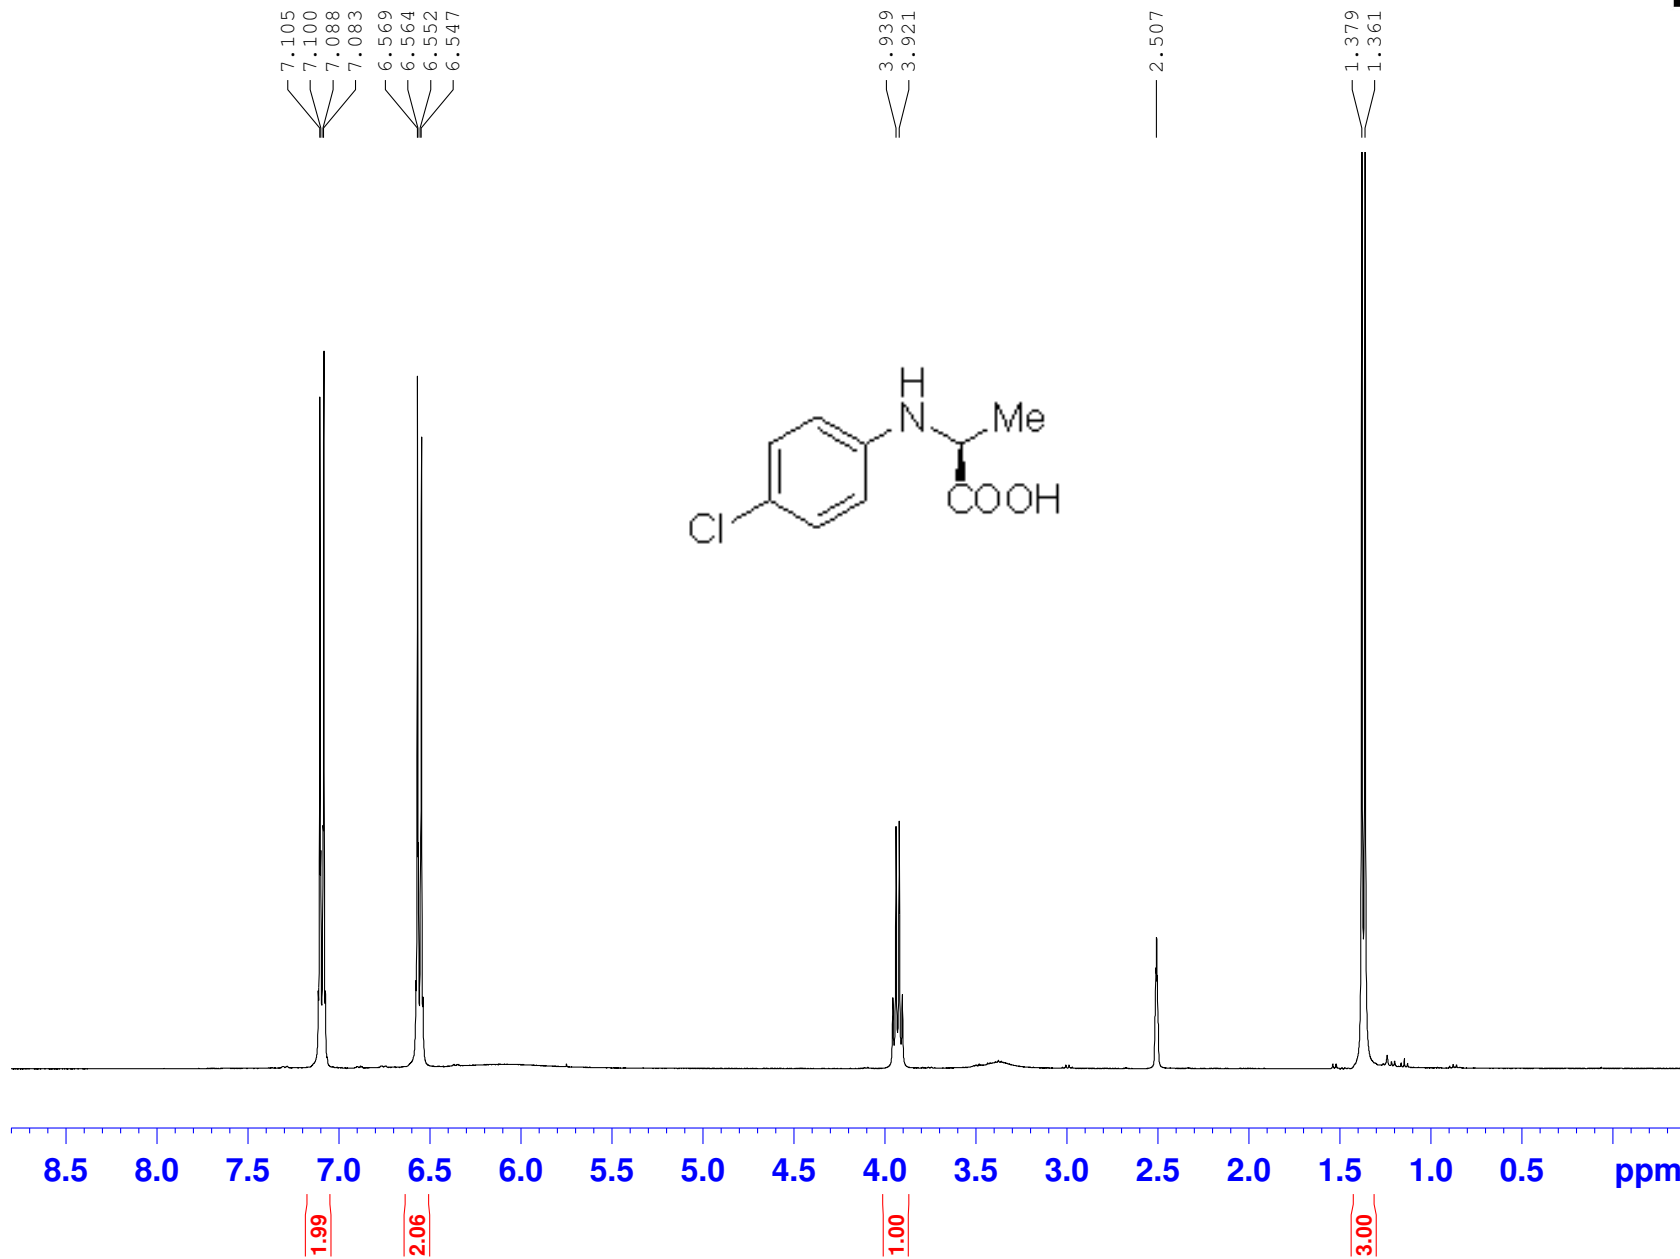

Current Data Parameters  
NAME wdp  
EXPNO 336  
PROCNO 1

F2 - Acquisition Parameters  
Date\_ 20081012  
Time 11.20  
INSTRUM spect  
PROBHD 5 mm PABBO BB-  
PULPROG zg30  
TD 65536  
SOLVENT DMSO  
NS 10  
DS 2  
SWH 8278.146 Hz  
FIDRES 0.126314 Hz  
AQ 3.9584243 sec  
RG 90.5  
DW 60.400 usec  
DE 8.00 usec  
TE 299.5 K  
D1 1.00000000 sec  
TD0 1

==== CHANNEL f1 =====  
NUC1 1H  
P1 13.60 usec  
PL1 0.00 dB  
SFO1 400.1324710 MHz

F2 - Processing parameters  
SI 32768  
SF 400.1300000 MHz  
WDW EM  
SSB 0  
LB 0.30 Hz  
GB 0  
PC 1.00



125318

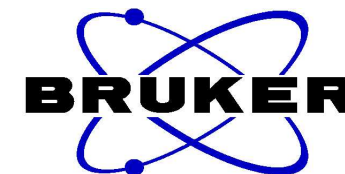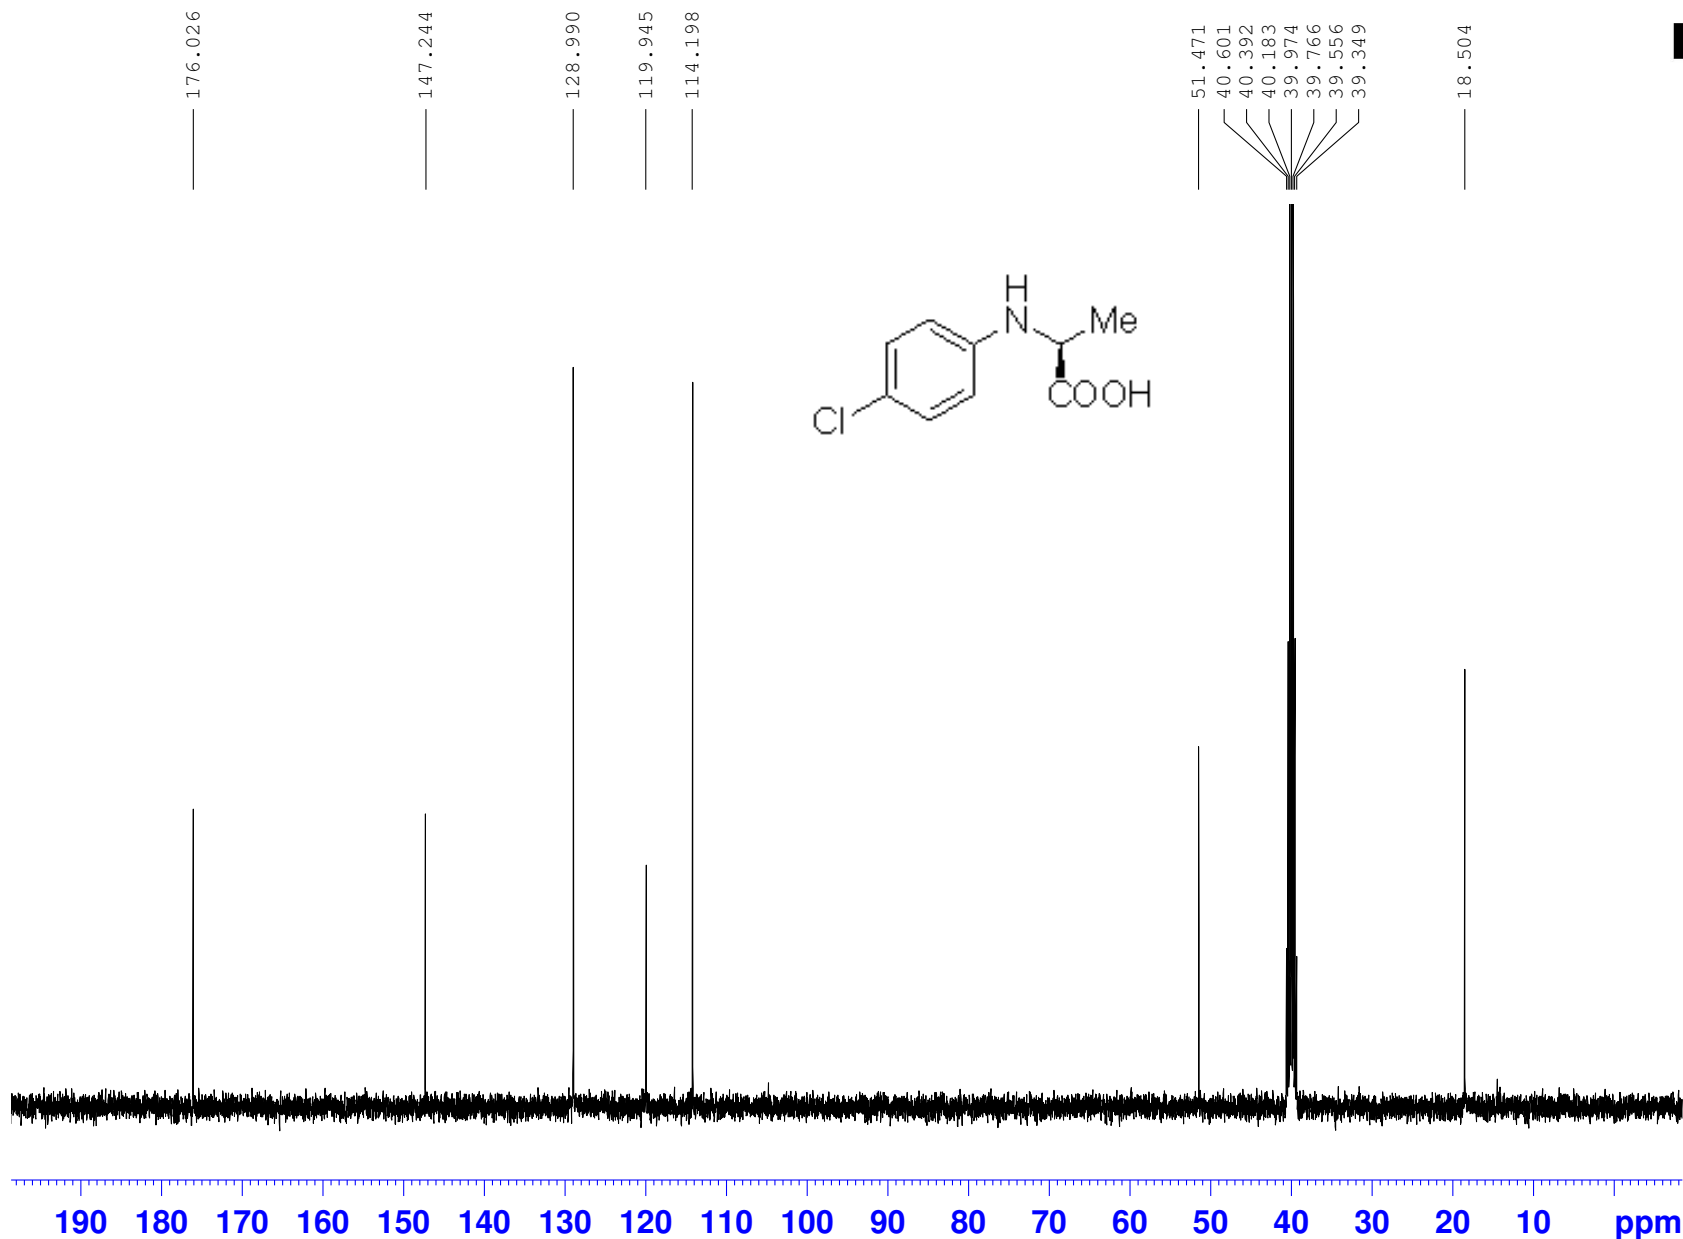

Current Data Parameters  
NAME wdp  
EXPNO 337  
PROCNO 1

F2 - Acquisition Parameters  
Date\_ 20081012  
Time 11.31  
INSTRUM spect  
PROBHD 5 mm PABBO BB-  
PULPROG zgpg30  
TD 65536  
SOLVENT DMSO  
NS 74  
DS 4  
SWH 23980.814 Hz  
FIDRES 0.365918 Hz  
AQ 1.3664756 sec  
RG 23170.5  
DW 20.850 usec  
DE 8.00 usec  
TE 300.4 K  
D1 2.00000000 sec  
d11 0.03000000 sec  
DELTA 1.89999998 sec  
TD0 1

==== CHANNEL f1 =====  
NUC1 13C  
P1 12.20 usec  
PL1 1.00 dB  
SFO1 100.6228298 MHz

==== CHANNEL f2 =====  
CPDPRG2 waltz16  
NUC2 1H  
PCPD2 80.00 usec  
PL12 15.39 dB  
PL13 15.50 dB  
PL2 0.00 dB  
SFO2 400.1316005 MHz

F2 - Processing parameters  
SI 32768  
SF 100.6127690 MHz  
WDW EM  
SSB 0  
LB 1.00 Hz  
GB 0  
PC 1.40

125322

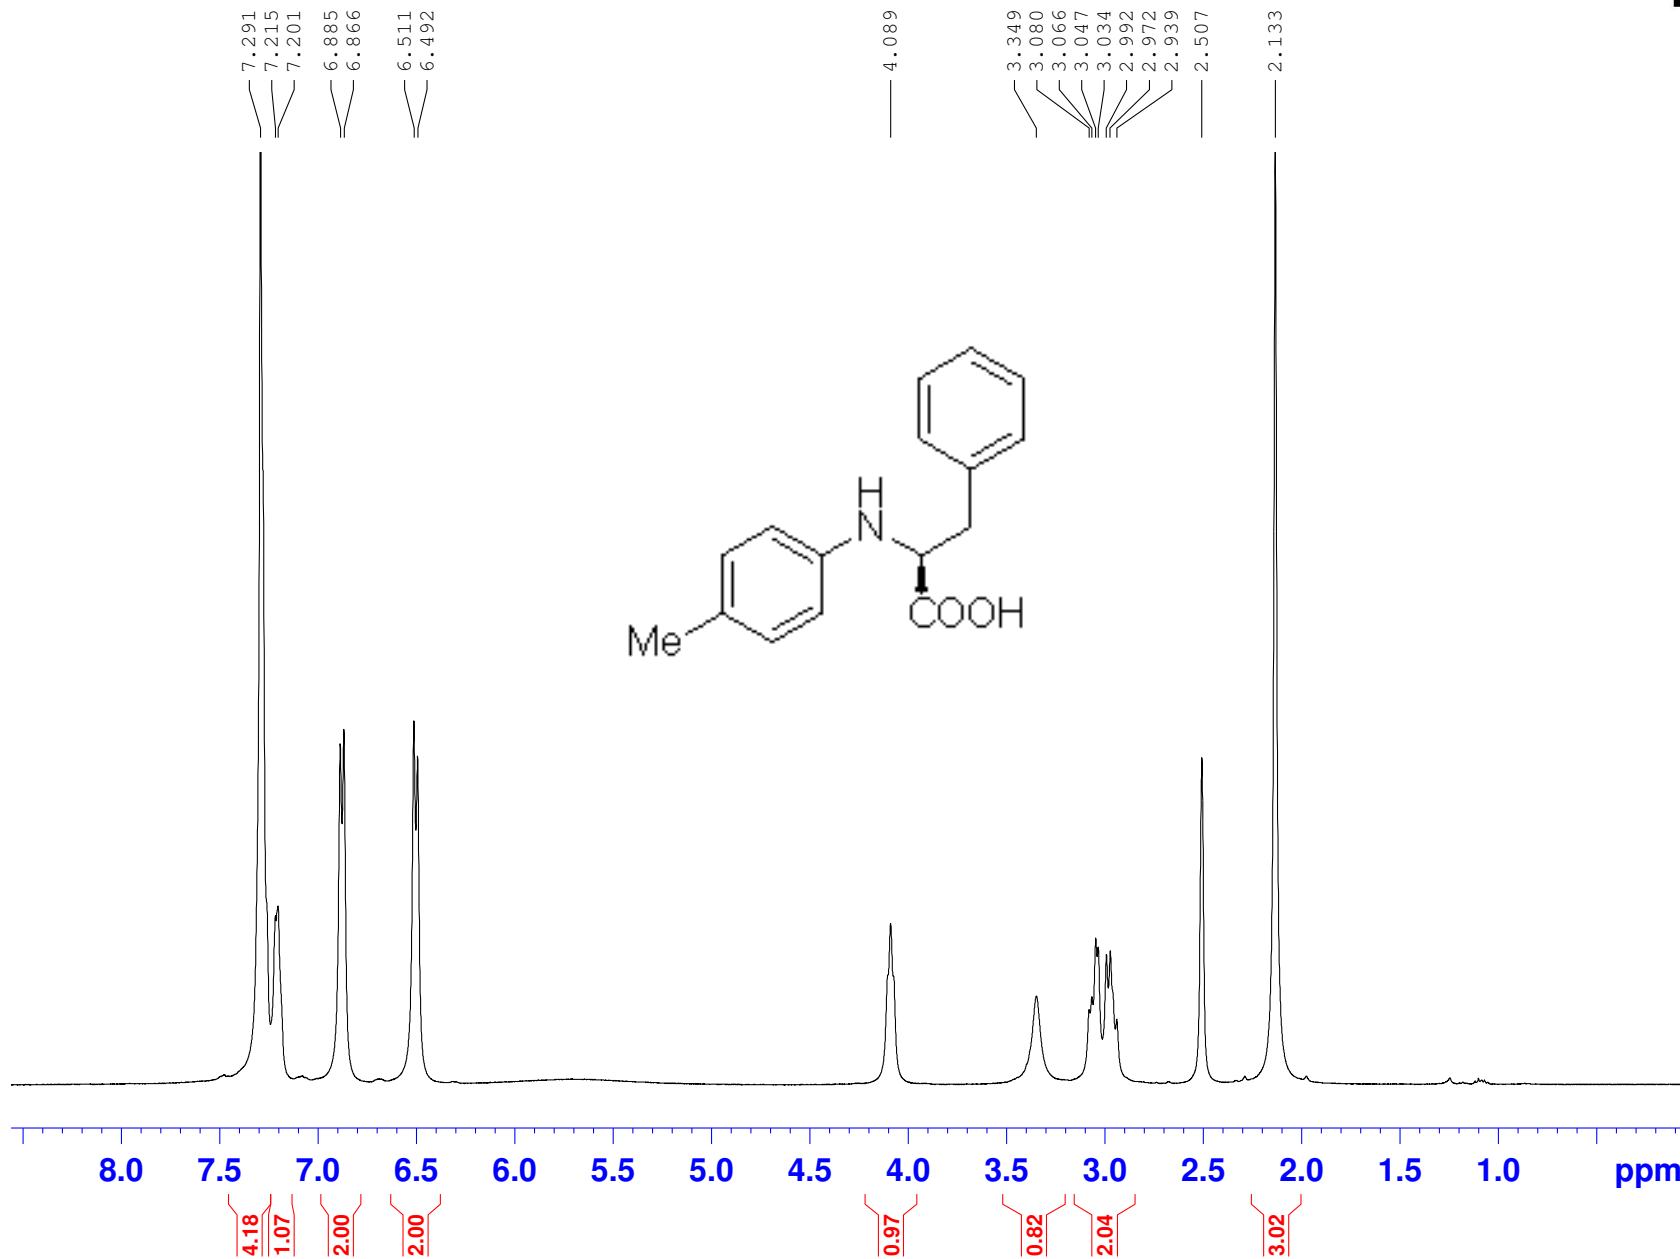

Current Data Parameters  
NAME wdp  
EXPNO 338  
PROCNO 1

F2 - Acquisition Parameters  
Date\_ 20081012  
Time 11.52  
INSTRUM spect  
PROBHD 5 mm PABBO BB-  
PULPROG zg30  
TD 65536  
SOLVENT DMSO  
NS 15  
DS 2  
SWH 8278.146 Hz  
FIDRES 0.126314 Hz  
AQ 3.9584243 sec  
RG 90.5  
DW 60.400 usec  
DE 8.00 usec  
TE 299.5 K  
D1 1.00000000 sec  
TD0 1

==== CHANNEL f1 =====  
NUC1 1H  
P1 13.60 usec  
PL1 0.00 dB  
SFO1 400.1324710 MHz

F2 - Processing parameters  
SI 32768  
SF 400.1300000 MHz  
WDW EM  
SSB 0  
LB 0.30 Hz  
GB 0  
PC 1.00

125322

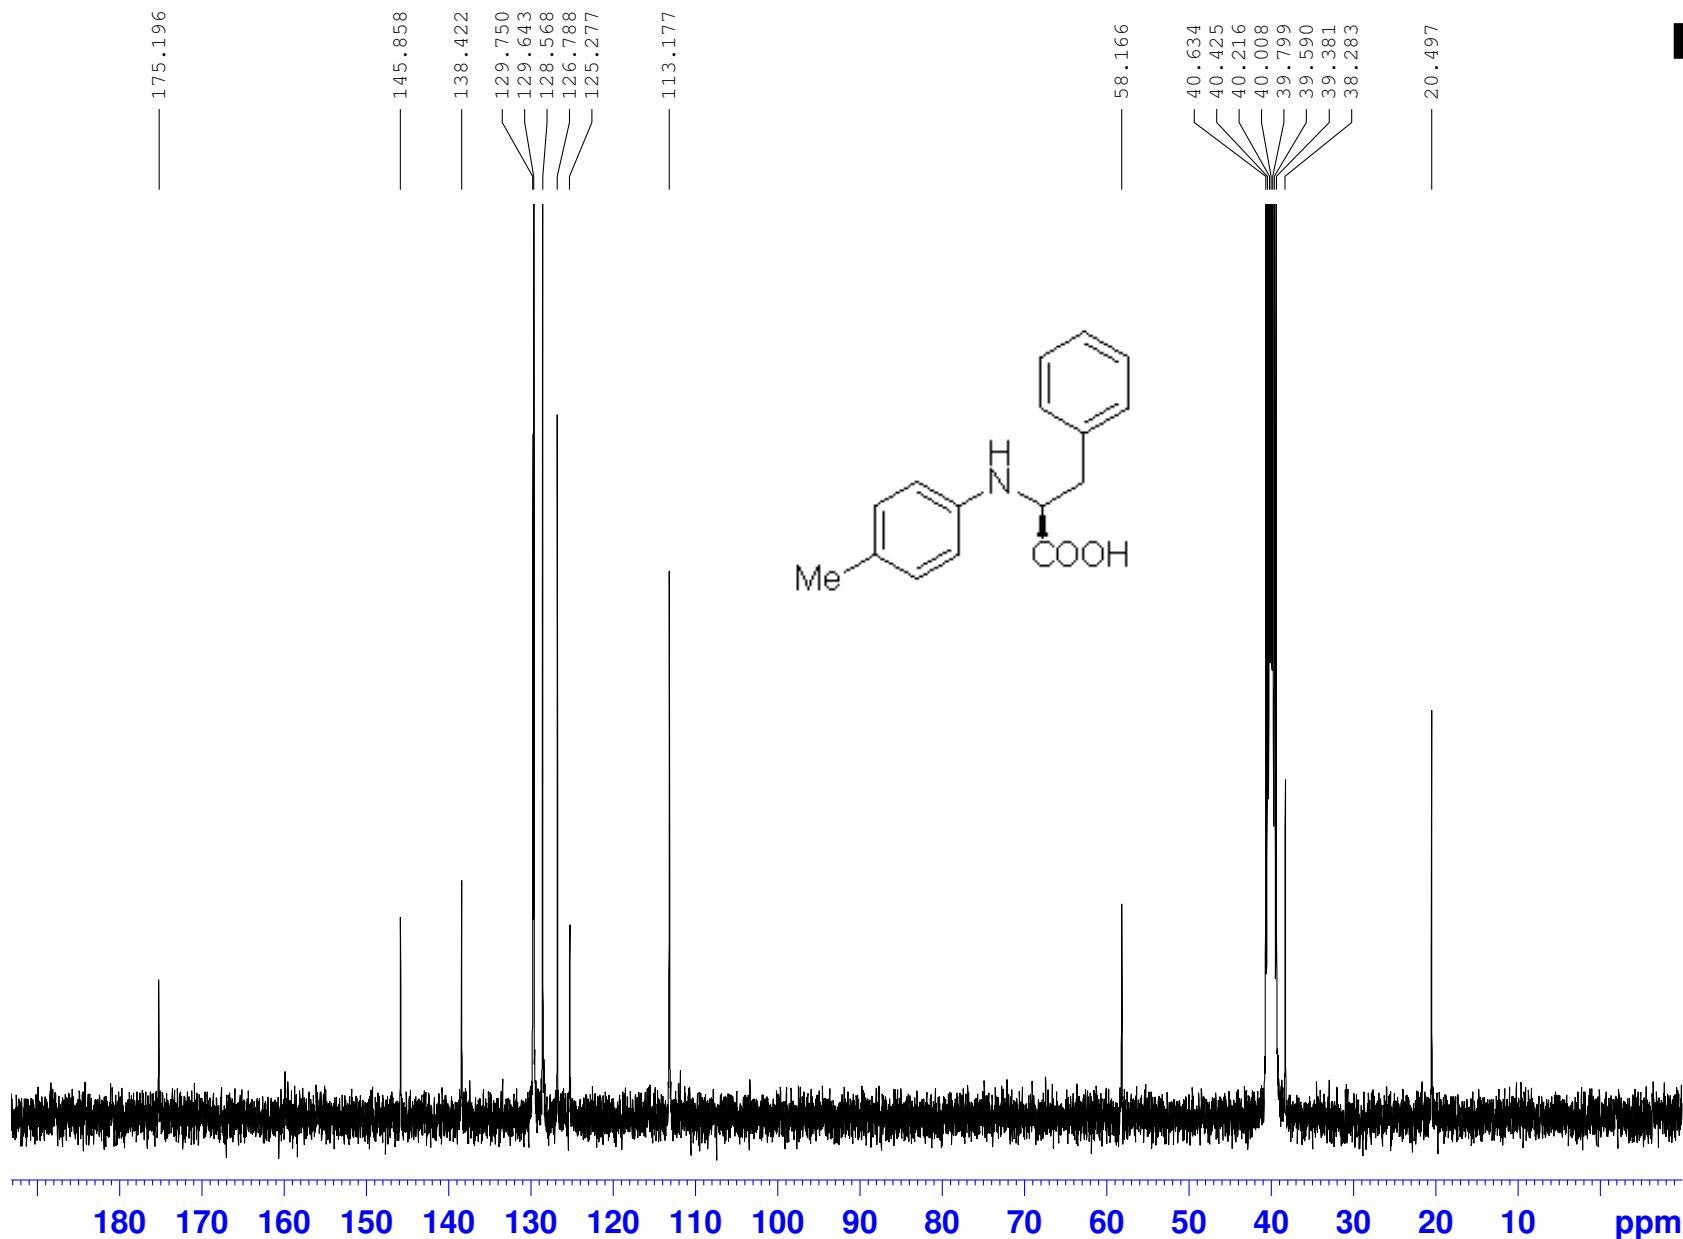

```

Current Data Parameters
NAME          wdp
EXPNO         339
PROCNO        1

F2 - Acquisition Parameters
Date_         20081012
Time          11.58
INSTRUM       spect
PROBHD        5 mm PABBO BB-
PULPROG       zgpg30
TD            65536
SOLVENT       DMSO
NS            537
DS            4
SWH           23980.814 Hz
FIDRES        0.365918 Hz
AQ            1.3664756 sec
RG            26008
DW            20.850 usec
DE            8.00 usec
TE            300.4 K
D1            2.00000000 sec
d11           0.03000000 sec
DELTA         1.89999998 sec
TD0           1

===== CHANNEL f1 =====
NUC1          13C
P1            12.20 usec
PL1           1.00 dB
SFO1          100.6228298 MHz

===== CHANNEL f2 =====
CPDPRG2       waltz16
NUC2          1H
PCPD2         80.00 usec
PL12          15.39 dB
PL13          15.50 dB
PL2           0.00 dB
SFO2          400.1316005 MHz

F2 - Processing parameters
SI            32768
SF            100.6127690 MHz
WDW           EM
SSB           0
LB            1.00 Hz
GB            0
PC            1.40
    
```

### Room Temperature Amination of Heteroaryl Iodides: Table 3.

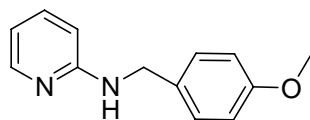

**2-(*p*-methoxybenzylamino)pyridine (6a).** Following Procedure A, 2-iodopyridine (205 mg, 1.0 mmol) was allowed to react with 4-methoxybenzylamine (206 mg, 1.5 mmol) for 17 h. The crude brown oil was purified by flash chromatography on silica gel eluent (6:1 petroleum ether: ethyl acetate) to provide 96 % yield of the desired product as a whit solid.  $^1\text{H}$  NMR( $\text{CDCl}_3$ ):  $\delta$ =8.09 (d,  $J$ =5.2 Hz, 1 H; Phenyl), 7.39 (td,  $J$ =6.8, 2.0 Hz, 2 H; Phenyl), 7.29 (d,  $J$ =8.8 Hz, 2 H; Phenyl), 6.88 (d,  $J$ =8.4 Hz, 2 H; Phenyl), 6.57 (m, 1 H; Phenyl), 6.37 (d,  $J$ =8.4 Hz, 1 H; Phenyl), 5.06 (br s, 1 H; NH), 4.43 (d,  $J$ =5.6 Hz, 2 H;  $\text{CH}_2$ ), 3.81 ppm (s, 3 H;  $\text{CH}_3$ );  $^{13}\text{C}$  NMR( $\text{CDCl}_3$ ):  $\delta$ =158.9, 158.7, 148.1, 137.5, 131.2, 128.7, 114.1, 113.0, 106.8 (Phenyl), 55.3 ( $\text{CH}_2$ ), 45.8 ppm ( $\text{CH}_3$ ); GC/MS: rt = 9.06 min, M/Z = 214.

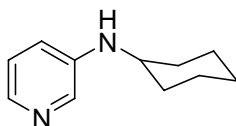

**3-(cyclohexylamino)pyridine (6b).** Following Procedure A, 3-iodopyridine (205 mg, 1.0 mmol) was allowed to react with cyclohexanamine (149 mg, 1.5 mmol) for 24 h. The crude brown oil was purified by flash chromatography on silica gel eluent (5:1 petroleum ether: ethyl acetate) to provide 88 % yield of the desired product as a whit solid.  $^1\text{H}$  NMR( $\text{CDCl}_3$ ):  $\delta$ =8.01 (br s, 1 H; Phenyl), 7.91 (br s, 1 H; Phenyl), 7.05 (br s, 1 H; Phenyl), 6.84 (d,  $J$ =7.6 Hz, 1 H; Phenyl), 3.70 (br s, 1 H; NH), 3.28-3.21 (m, 1 H; -N-CH-), 2.05-2.02 (m, 2 H;  $\text{CH}_2$ ), 1.68-1.63 (m, 1 H;  $\text{CH}_2$ ), 1.43-1.26 ppm (m, 5 H;  $\text{CH}_2$ );  $^{13}\text{C}$  NMR( $\text{CDCl}_3$ ):  $\delta$ =143.5, 137.9, 136.1, 123.8, 118.8 (Phenyl), 51.4 (-N-CH-), 33.2, 25.8, 24.9 ppm ( $\text{CH}_2$ ); GC/MS: rt = 7.85 min, M/Z = 176.

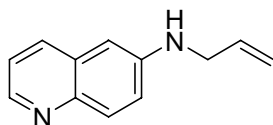

**6-(allylamino)-quinoline (6f).** Following Procedure A, 6-iodoquinoline (255 mg, 1.0 mmol) was allowed to react with allylamine (115 mg, 2 mmol) for 19 h. The crude brown oil was purified by flash chromatography on silica gel eluent (5:1 petroleum ether: ethyl acetate) to provide 87 % yield of the desired product as a brown oil.  $^1\text{H}$  NMR( $\text{CDCl}_3$ ):  $\delta$ =8.61 (d,  $J$ =4.0 Hz, 1 H; Phenyl), 7.91 (m, 2 H; Phenyl), 7.29-7.26 (m, 1 H; Phenyl), 7.12 (m, 1 H; Phenyl), 6.72 (d,  $J$ =2.0 Hz, 1 H; Phenyl), 6.05-5.98 (m, 1 H; - $\text{CH}_2$ - $\text{CH}=\text{}$ ), 5.33 (m, 1 H; - $\text{CH}=\text{CHH}$ ), 5.22 (m, 1 H; - $\text{CH}=\text{CHH}$ ), 4.22 (br s, 1 H; NH), 3.89 ppm (d,  $J$ =4.4 Hz, 2 H;  $\text{CH}_2$ );  $^{13}\text{C}$  NMR( $\text{CDCl}_3$ ):  $\delta$ =167.5, 146.1, 145.8, 134.6, 134.2, 130.2, 129.9, 121.6, 121.3 (Phenyl), 116.7 (- $\text{CH}=\text{}$ ), 103.3 (- $\text{CH}=\text{CHH}$ ), 46.4 ppm ( $\text{CH}_2$ ); GC/MS: rt = 8.54 min, M/Z = 184.

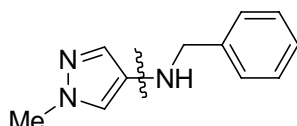

**4-(N-benzyl)-1-methyl-1H-pyrazolamine (6g).** Following Procedure A, 4-iodo-1-methyl-1H-pyrazole (208 mg, 1.0 mmol) was allowed to react with benzylamine (161 mg, 1.5 mmol) for 24 h. The crude brown oil was purified by flash chromatography on silica gel eluent (4:1 petroleum ether: ethyl acetate) to provide 83 % yield of the desired product as a brown oil.  $^1\text{H}$  NMR( $\text{CDCl}_3$ ):  $\delta$ =7.39-7.28 (m, 5 H; Phenyl), 7.14 (s, 1 H; Phenyl), 6.86 (s, 1 H; Phenyl), 4.16 (s, 2

H; CH<sub>2</sub>), 3.78 ppm (s, 3 H; CH<sub>3</sub>); <sup>13</sup>C NMR(CDCl<sub>3</sub>): δ=139.6, 134.1, 128.7, 128.5, 127.7, 127.2, 116.7 (Phenyl), 52.2 (CH<sub>2</sub>), 39.1 ppm (CH<sub>3</sub>); GC/MS: rt = 8.08 min, M/Z = 187.

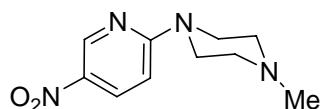

**2-(N-Methylpiperazino)-5-nitropyridine (6c).** Following Procedure A, 2-iodo-5-nitropyridine (250 mg, 1.0 mmol) was allowed to react with 1-methylpiperazine (150 mg, 1.5 mmol) for 11 h. The crude brown oil was purified by flash chromatography on silica gel eluent (1:2 petroleum ether: ethyl acetate) to provide 82 % yield of the desired product as a yellow solid. <sup>1</sup>H NMR(CDCl<sub>3</sub>): δ=9.03 (t, *J*=2.4 Hz, 1 H; Phenyl), 8.19 (m, 1 H; Phenyl), 6.57 (dd, *J*=9.6 0.8 Hz, 1 H; Phenyl), 3.83 (d, *J*=4.4 Hz, 4 H; Aryl-N-CH<sub>2</sub>-), 2.57 (d, *J*=4.0 Hz, 4 H; CH<sub>3</sub>-N-CH<sub>2</sub>-), 2.39 ppm (s, 3 H; CH<sub>3</sub>); <sup>13</sup>C NMR(CDCl<sub>3</sub>): δ=160.3, 146.4, 135.1, 133.0, 104.6 (Phenyl), 54.5 (Aryl-N-CH<sub>2</sub>-), 45.9 (CH<sub>3</sub>-N-CH<sub>2</sub>-), 44.7 ppm (CH<sub>3</sub>); GC/MS: rt = 9.63 min, M/Z = 222.

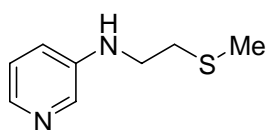

**3-[N-(2-(methylthio)ethyl)]-pyridineamine (6d).** Following Procedure A, 3-iodopyridine (205 mg, 1.0 mmol) was allowed to react with 2-(methylthio)ethanamine (138 mg, 1.5 mmol) for 20 h. The crude brown oil was purified by flash chromatography on silica gel eluent (5:1 petroleum ether: ethyl acetate) to provide 95 % yield of the desired product as a yellow oil. <sup>1</sup>H NMR(CDCl<sub>3</sub>): δ=8.04 (s, 1 H; Phenyl), 7.94 (d, *J*=3.6 Hz, 1 H; Phenyl), 7.08-7.05 (m, 1 H; Phenyl), 6.87 (d, *J*=8.0 Hz, 1 H; Phenyl), 4.28 (br s, 1 H; NH), 3.29 (t, *J*=6.4 Hz, 2 H; -N-CH<sub>2</sub>-), 2.73 (t, *J*=6.4 Hz, 2 H; -S-CH<sub>2</sub>-), 2.09 ppm (s, 3 H; CH<sub>3</sub>); <sup>13</sup>C NMR(CDCl<sub>3</sub>): δ=143.9, 138.8, 135.9, 123.8, 118.9 (Phenyl), 41.5 (-N-CH<sub>2</sub>-), 33.4 (-S-CH<sub>2</sub>-), 15.0 ppm (CH<sub>3</sub>); GC/MS: rt = 7.72 min, M/Z = 168; HRMS (EI): calcd for C<sub>8</sub>H<sub>12</sub>N<sub>2</sub>S: 168.0716 [M<sup>+</sup>]; found: 168.0719.

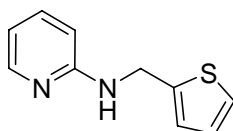

**2-[N-(2-thiophenmethyl)]-pyridinamine (6e).** Following Procedure A, 2-iodopyridine (205 mg, 1.0 mmol) was allowed to react with thiophen-2-ylmethanamine (170 mg, 1.5 mmol) for 14 h. The crude brown oil was purified by flash chromatography on silica gel eluent (10:1 petroleum ether: ethyl acetate) to provide 97 % yield of the desired product as a white solid. <sup>1</sup>H NMR(CDCl<sub>3</sub>): δ=8.13 (m, 1 H; Phenyl), 7.46-7.41 (m, 1 H; Phenyl), 7.21 (dd, *J*=5.2 1.2 Hz, 1 H; Phenyl), 7.02 (m, 1 H; Phenyl), 6.96 (m, 1 H; Phenyl), 6.61 (td, *J*=6.0, 0.4 Hz, 1 H; Phenyl), 6.44 (d, *J*=8.0 Hz, 1 H; Phenyl), 5.08 (br s, 1 H; NH), 4.71 ppm (d, *J*=6.0 Hz, 2 H; CH<sub>2</sub>); <sup>13</sup>C NMR(CDCl<sub>3</sub>): δ=158.1, 147.9, 142.6, 137.5, 126.8, 125.2, 124.6, 113.5, 107.4 (Phenyl), 41.3 ppm (CH<sub>2</sub>); GC/MS: rt = 8.01 min, M/Z = 190.

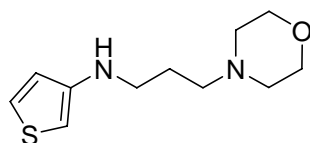

**3-[N-(3-morpholinopropyl)]thiophenamine (6h).** Following Procedure A, 3-iodothiophene (210 mg, 1.0 mmol) was allowed to react with 3-morpholinopropan-1-amine (216 mg, 1.5 mmol) for 14 h. The crude brown oil was purified by flash chromatography on silica gel eluent (40:1 CH<sub>2</sub>Cl<sub>2</sub>: MeOH) to provide 90 % yield of the desired product as a

brown oil.  $^1\text{H}$  NMR( $\text{CDCl}_3$ ):  $\delta=7.15$  (dd,  $J=4.8$  2.8 Hz, 1 H; Phenyl), 6.62 (dd,  $J=5.2$  1.6 Hz, 1 H; Phenyl), 5.95 (m, 1 H; Phenyl), 3.73 (m, 4 H; -O-CH<sub>2</sub>-), 3.16 (t,  $J=6.4$  Hz, 2 H; -NH-CH<sub>2</sub>-), 2.51 (m, 6 H; -N-CH<sub>2</sub>-), 1.87-1.81 ppm (m, 2 H; CH<sub>2</sub>);  $^{13}\text{C}$  NMR( $\text{CDCl}_3$ ) :  $\delta=148.9$ , 125.1, 119.9, 95.2 (Phenyl), 66.9 (-O-CH<sub>2</sub>-), 57.6 (-NH-CH<sub>2</sub>-), 53.7 (-N-CH<sub>2</sub>-), 45.5 (-N-CH<sub>2</sub>-), 25.5 ppm (CH<sub>2</sub>); GC/MS: rt = 8.79 min, M/Z = 226; HRMS (EI): calcd for C<sub>11</sub>H<sub>18</sub>ON<sub>2</sub>S : 226.1134 [M<sup>+</sup>]; found: 226.1133.

125294

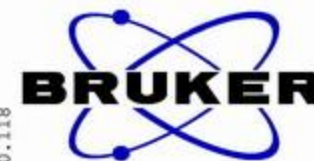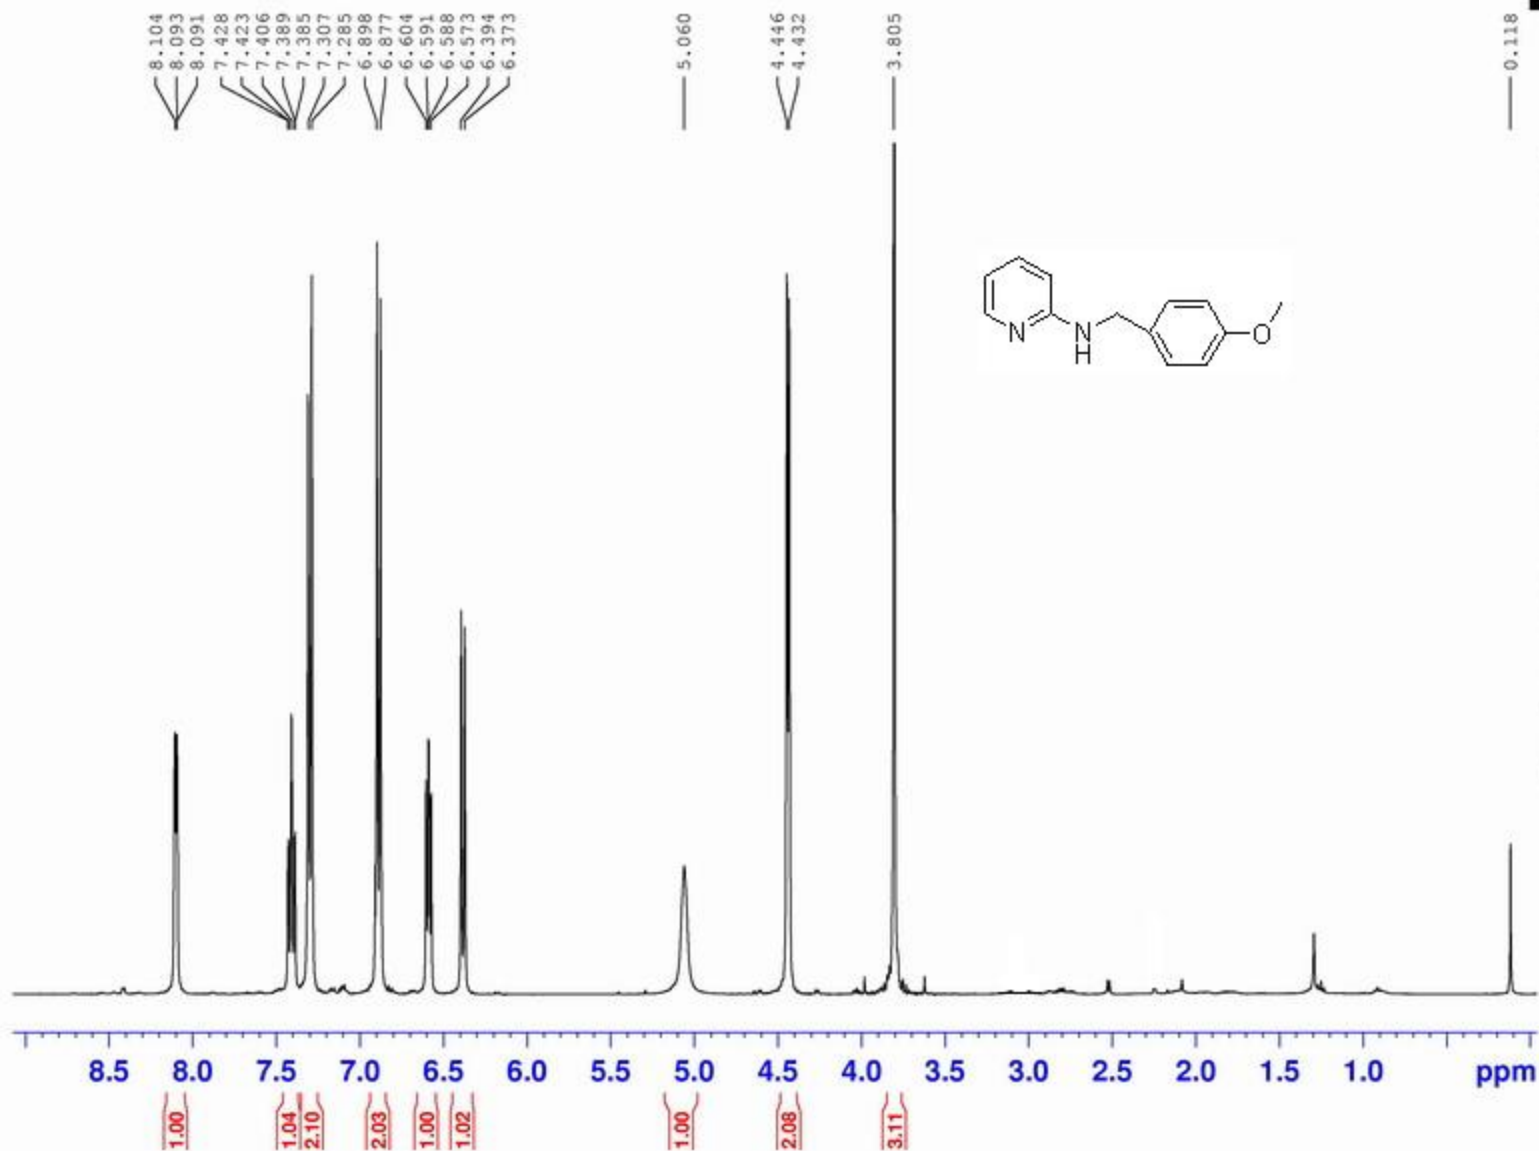

Current Data Parameters  
 NAME wdp  
 EXPNO 294  
 PROCNO 1

F2 - Acquisition Parameters  
 Date\_ 20080906  
 Time 21.21  
 INSTRUM spect  
 PROBHD 5 mm PABBO BB-  
 PULPROG zg30  
 TD 65536  
 SOLVENT CDCl3  
 NS 9  
 DS 2  
 SWH 8278.146 Hz  
 FIDRES 0.126314 Hz  
 AQ 3.9584243 sec  
 RG 57  
 DW 60.400 usec  
 DE 6.00 usec  
 TE 302.7 K  
 D1 1.00000000 sec  
 TDO 1

----- CHANNEL f1 -----  
 NUC1 1H  
 P1 13.60 usec  
 PL1 0.00 dB  
 SFO1 400.1324710 MHz

F2 - Processing parameters  
 SI 32768  
 SF 400.1300000 MHz  
 WDW EM  
 SSB 0  
 LB 0.30 Hz  
 GB 0  
 PC 1.00

125294

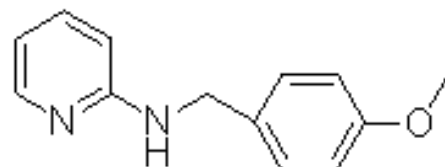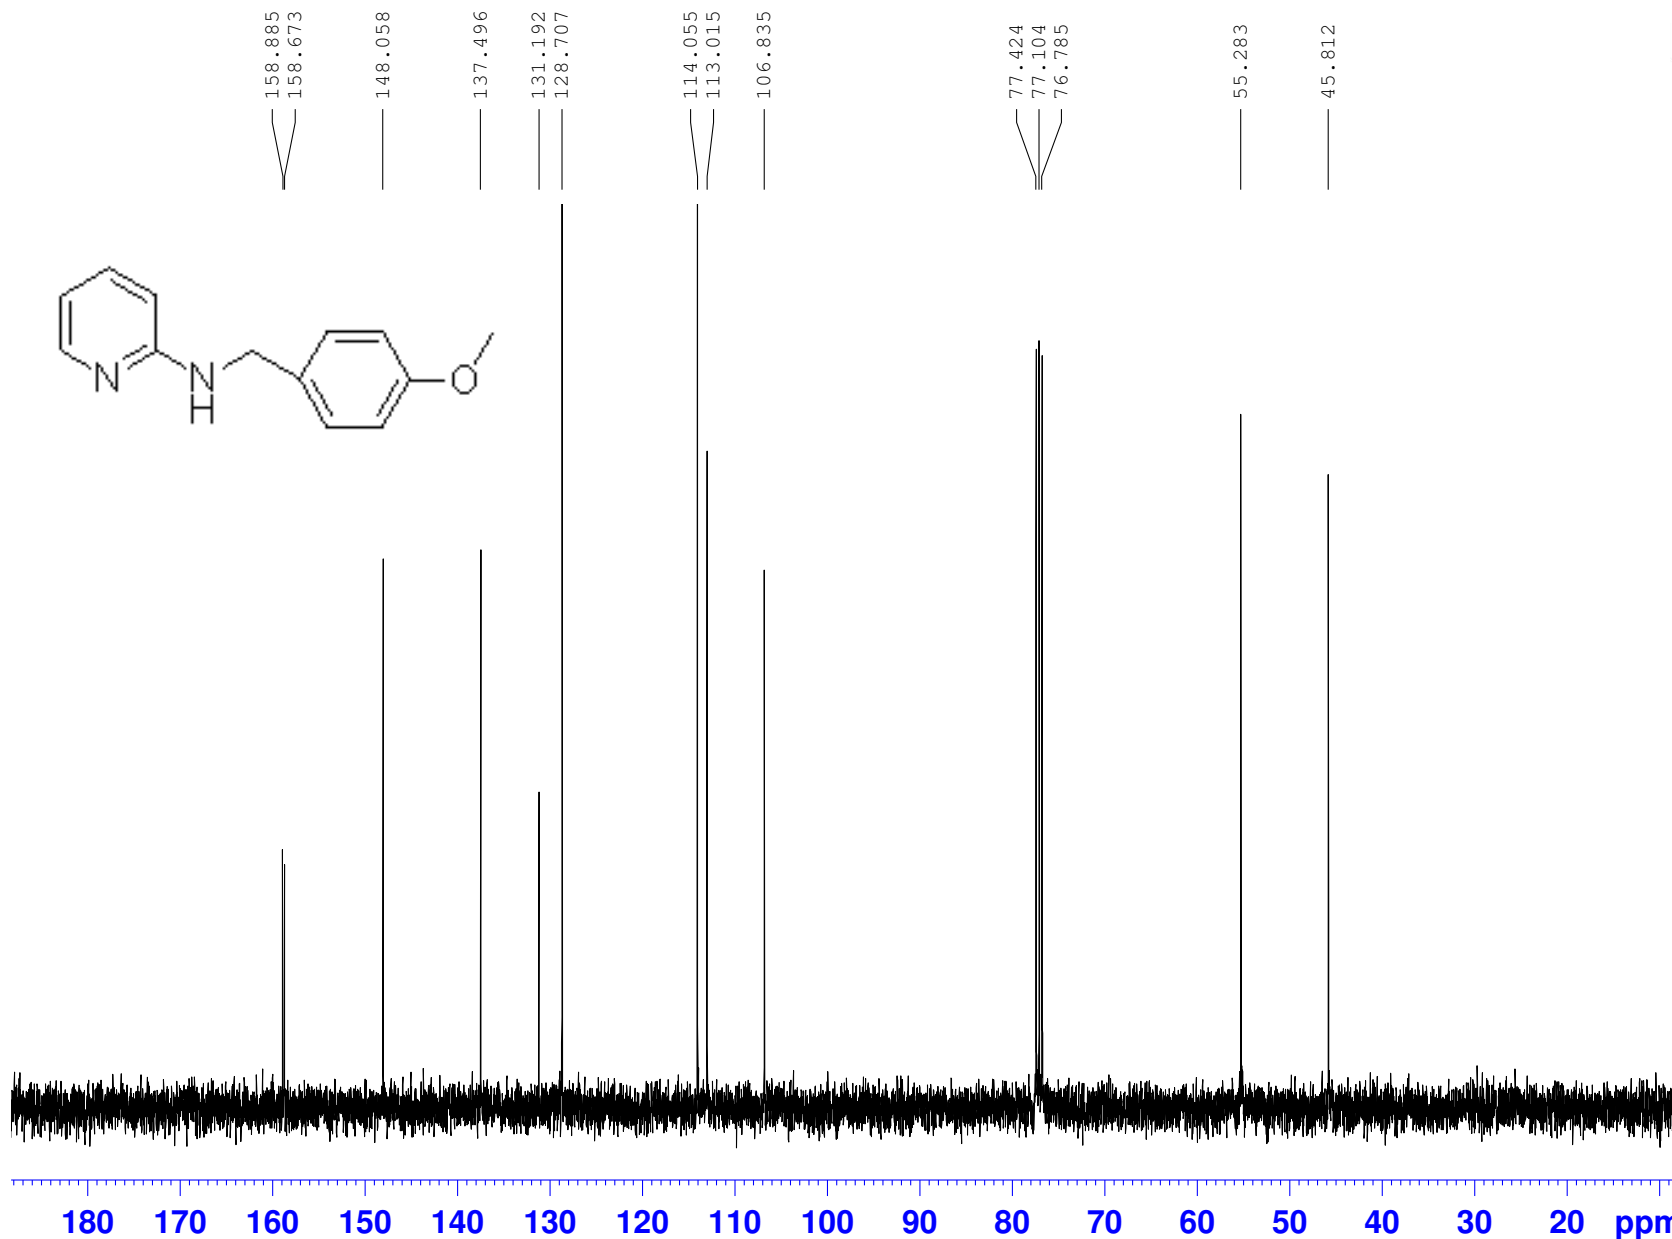

```
Current Data Parameters
NAME          wdp
EXPNO         295
PROCNO        1

F2 - Acquisition Parameters
Date_         20080906
Time          21.27
INSTRUM       spect
PROBHD        5 mm PABBO BB-
PULPROG       zgpg30
TD            65536
SOLVENT       CDCl3
NS            16
DS            4
SWH           23980.814 Hz
FIDRES        0.365918 Hz
AQ            1.3664756 sec
RG            812.7
DW            20.850 usec
DE            6.00 usec
TE            302.8 K
D1            2.00000000 sec
d11           0.03000000 sec
DELTA         1.89999998 sec
TD0           1

===== CHANNEL f1 =====
NUC1          13C
P1            12.20 usec
PL1           1.00 dB
SFO1          100.6228298 MHz

===== CHANNEL f2 =====
CPDPRG2       waltz16
NUC2          1H
PCPD2         80.00 usec
PL2           0.00 dB
PL12          15.39 dB
PL13          15.50 dB
SFO2          400.1316005 MHz

F2 - Processing parameters
SI            32768
SF            100.6127690 MHz
WDW           EM
SSB           0
LB            1.00 Hz
GB            0
PC            1.40
```



125295

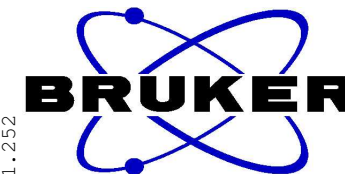

8.012  
7.910

7.284  
7.054  
6.861  
6.842

3.740  
3.704  
3.276  
3.267  
3.251  
3.242  
3.233  
3.217  
3.208  
2.433  
2.146  
2.107  
2.051  
2.038  
2.026  
2.019  
1.793  
1.784  
1.774  
1.760  
1.750  
1.742  
1.680  
1.672  
1.662  
1.650  
1.640  
1.631  
1.426  
1.417  
1.409  
1.396  
1.388  
1.357  
1.333  
1.325  
1.318  
1.281  
1.273  
1.258  
1.252

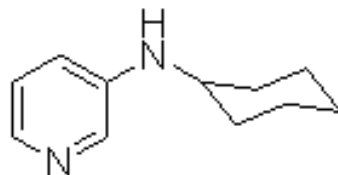

Current Data Parameters  
NAME wdp  
EXPNO 307  
PROCNO 1

F2 - Acquisition Parameters  
Date\_ 20080927  
Time 18.25  
INSTRUM spect  
PROBHD 5 mm PABBO BB-  
PULPROG zg30  
TD 65536  
SOLVENT CDCl3  
NS 7  
DS 2  
SWH 8278.146 Hz  
FIDRES 0.126314 Hz  
AQ 3.9584243 sec  
RG 57  
DW 60.400 usec  
DE 6.00 usec  
TE 301.6 K  
D1 1.00000000 sec  
TD0 1

==== CHANNEL f1 =====  
NUC1 1H  
P1 13.60 usec  
PL1 0.00 dB  
SFO1 400.1324710 MHz

F2 - Processing parameters  
SI 32768  
SF 400.1300000 MHz  
WDW EM  
SSB 0  
LB 0.30 Hz  
GB 0  
PC 1.00

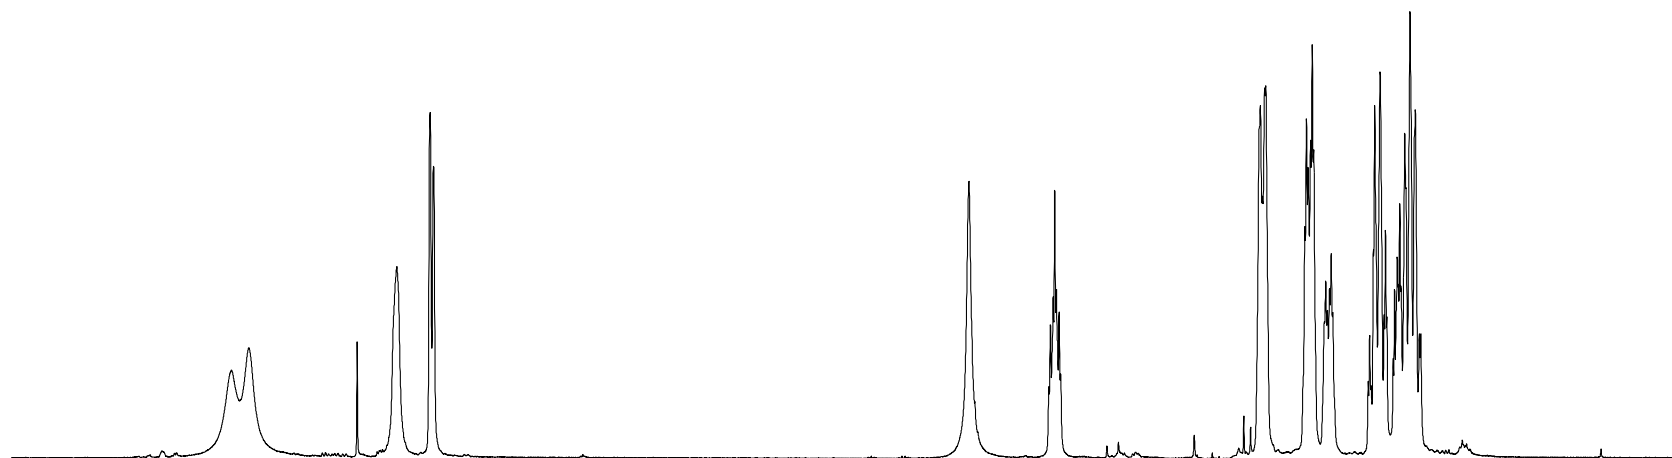

9.0 8.5 8.0 7.5 7.0 6.5 6.0 5.5 5.0 4.5 4.0 3.5 3.0 2.5 2.0 1.5 1.0 0.5 ppm

1.94

1.00

1.05

1.25

1.04

2.11

2.12

1.09

2.15

3.53

125295

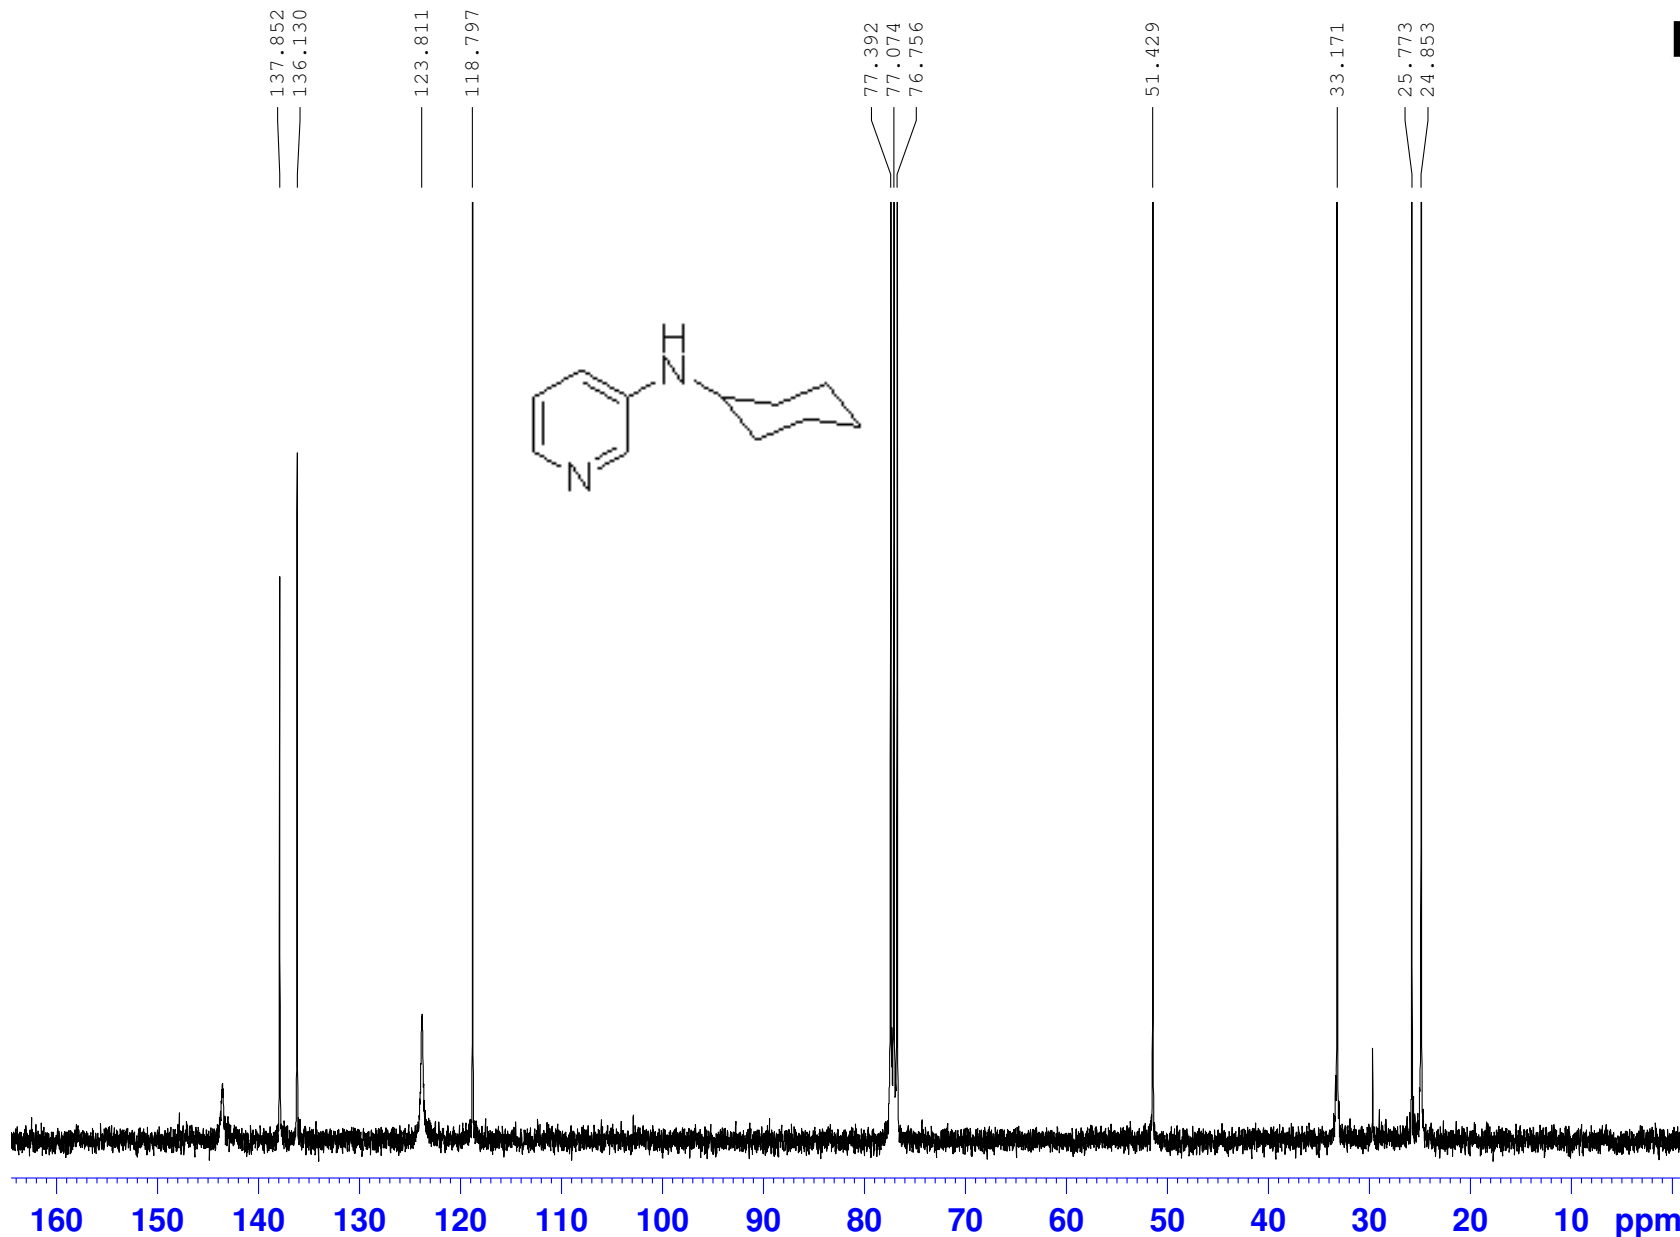

```
Current Data Parameters
NAME          wdp
EXPNO         306
PROCNO        1

F2 - Acquisition Parameters
Date_         20080927
Time          17.05
INSTRUM       spect
PROBHD        5 mm PABBO BB-
PULPROG       zgpg30
TD            65536
SOLVENT       CDCl3
NS            1024
DS            4
SWH           23980.814 Hz
FIDRES        0.365918 Hz
AQ            1.3664756 sec
RG            912.3
DW            20.850 usec
DE            6.00 usec
TE            302.0 K
D1            2.00000000 sec
d11           0.03000000 sec
DELTA         1.89999998 sec
TD0           1

===== CHANNEL f1 =====
NUC1          13C
P1            12.20 usec
PL1           1.00 dB
SFO1          100.6228298 MHz

===== CHANNEL f2 =====
CPDPRG2       waltz16
NUC2          1H
PCPD2         80.00 usec
PL2           0.00 dB
PL12          15.39 dB
PL13          15.50 dB
SFO2          400.1316005 MHz

F2 - Processing parameters
SI            32768
SF            100.6127690 MHz
WDW           EM
SSB           0
LB            1.00 Hz
GB            0
PC            1.40
```

125298

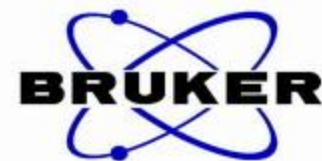

Current Data Parameters  
 NAME wdp  
 EXPNO 311  
 PROCNO 1

F2 - Acquisition Parameters  
 Date\_ 20080927  
 Time 20.23  
 INSTRUM spect  
 PROBHD 5 mm PABBO BB-  
 PULPROG zg30  
 TD 65536  
 SOLVENT CDCl3  
 NS 6  
 DS 2  
 SWH 8278.146 Hz  
 FIDRES 0.126314 Hz  
 AQ 3.9584243 sec  
 RG 161.3  
 DW 60.400 usec  
 DE 6.00 usec  
 TE 301.3 K  
 D1 1.00000000 sec  
 TDO 1

----- CHANNEL f1 -----  
 NUC1 1H  
 P1 13.60 usec  
 PL1 0.00 dB  
 SFO1 400.1324710 MHz

F2 - Processing parameters  
 SI 32768  
 SF 400.1300000 MHz  
 MDM EM  
 SSB 0  
 LB 0.30 Hz  
 GB 0  
 PC 1.00

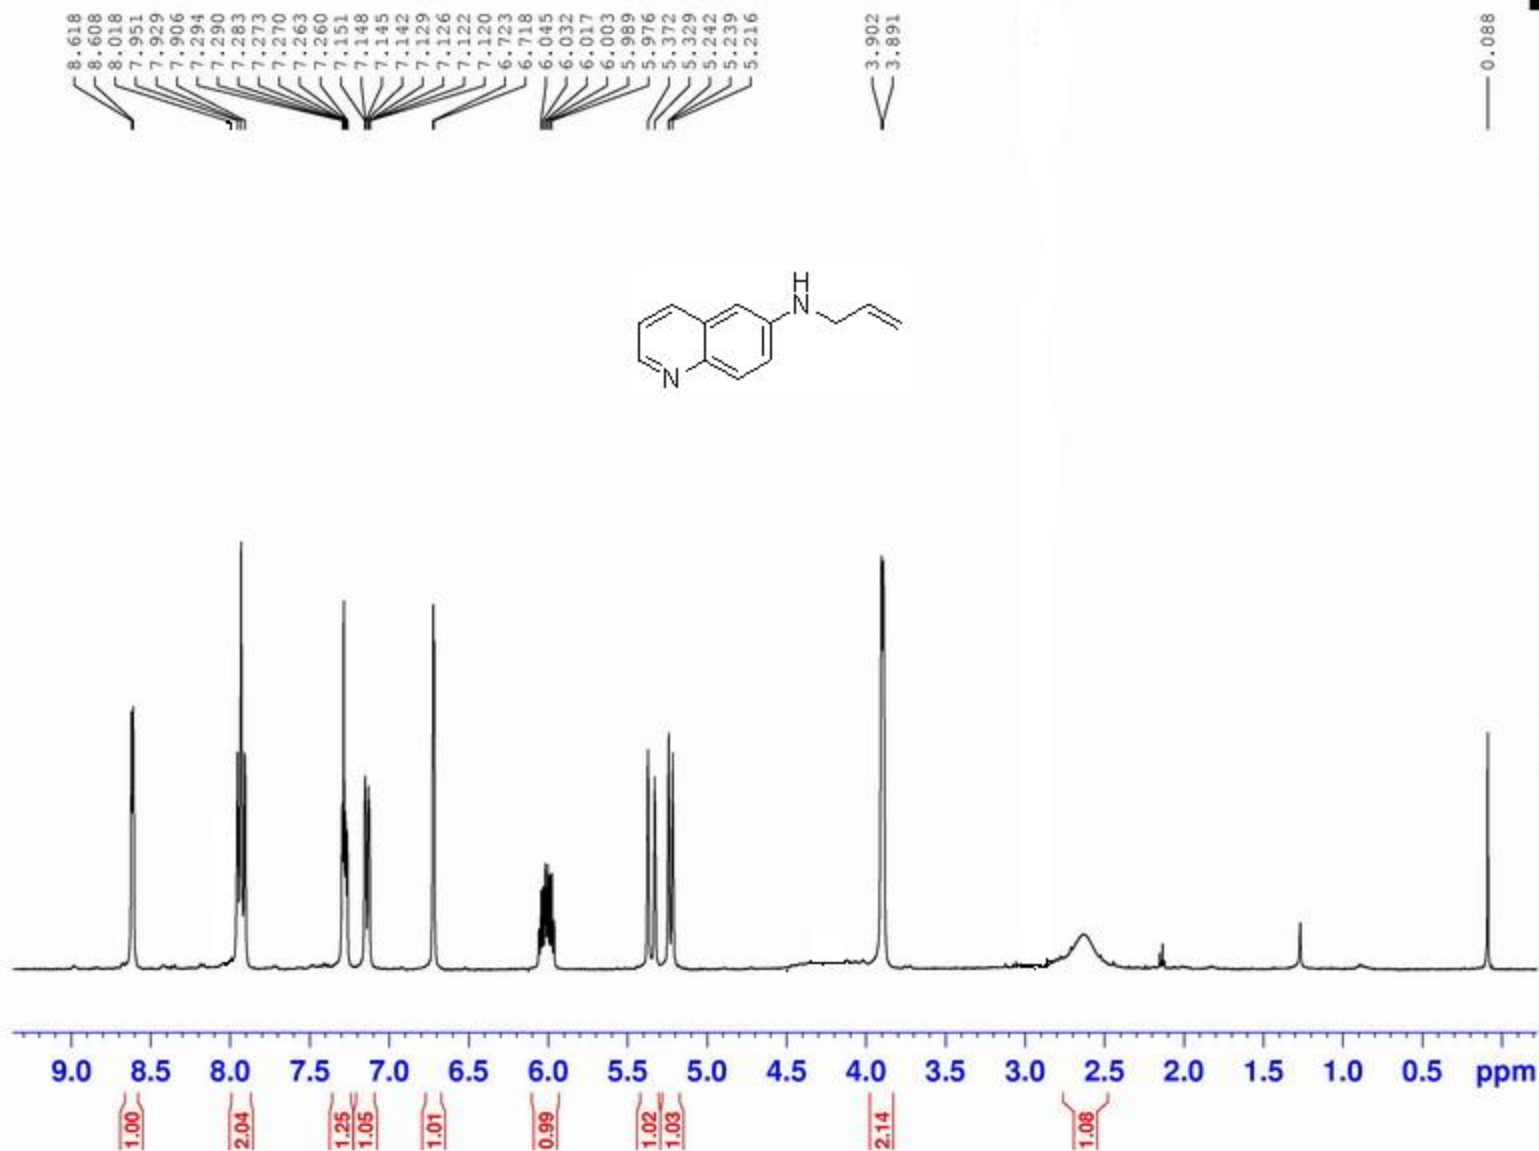

125298

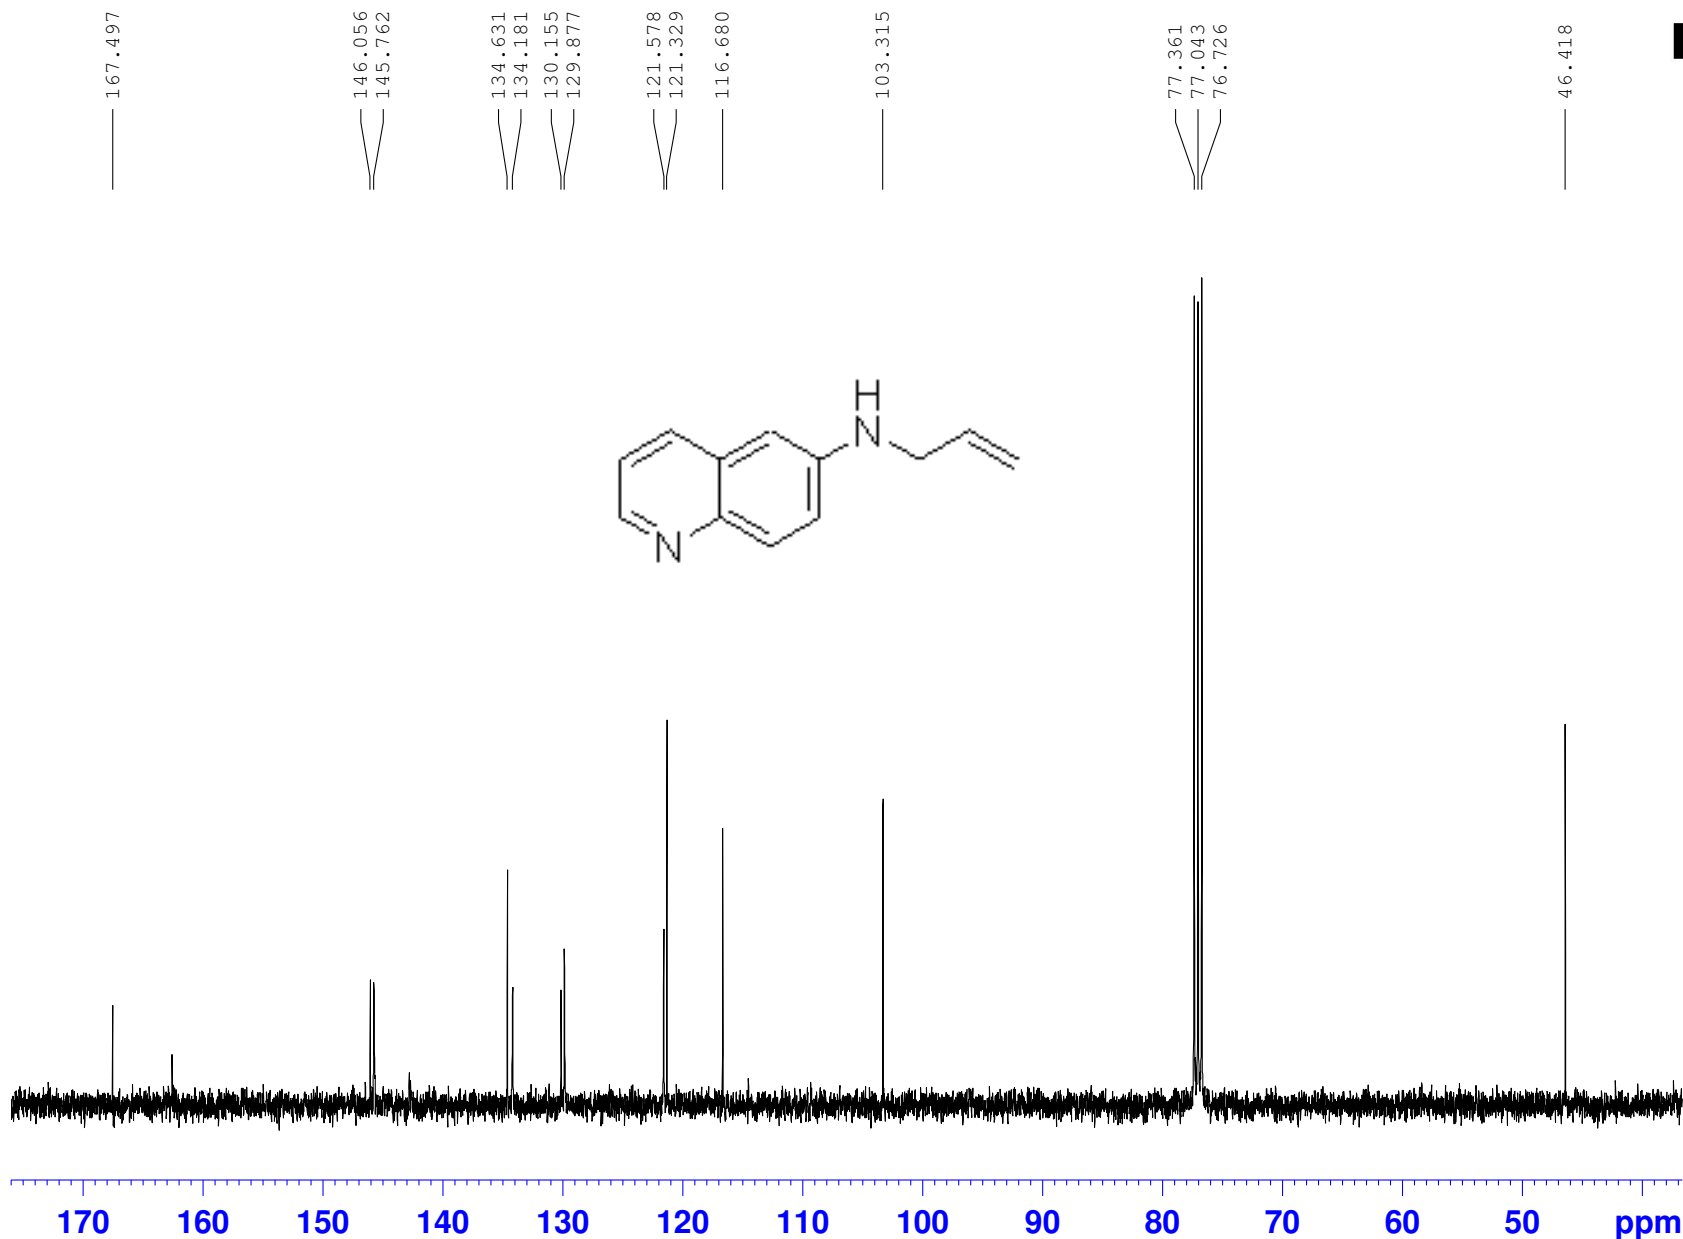

Current Data Parameters  
NAME wdp  
EXPNO 312  
PROCNO 1

F2 - Acquisition Parameters  
Date\_ 20080927  
Time 20.29  
INSTRUM spect  
PROBHD 5 mm PABBO BB-  
PULPROG zgpg30  
TD 65536  
SOLVENT CDCl3  
NS 157  
DS 4  
SWH 23980.814 Hz  
FIDRES 0.365918 Hz  
AQ 1.3664756 sec  
RG 1290.2  
DW 20.850 usec  
DE 6.00 usec  
TE 301.9 K  
D1 2.00000000 sec  
d11 0.03000000 sec  
DELTA 1.89999998 sec  
TD0 1

==== CHANNEL f1 =====  
NUC1 13C  
P1 12.20 usec  
PL1 1.00 dB  
SFO1 100.6228298 MHz

==== CHANNEL f2 =====  
CPDPRG2 waltz16  
NUC2 1H  
PCPD2 80.00 usec  
PL2 0.00 dB  
PL12 15.39 dB  
PL13 15.50 dB  
SFO2 400.1316005 MHz

F2 - Processing parameters  
SI 32768  
SF 100.6127690 MHz  
WDW EM  
SSB 0  
LB 1.00 Hz  
GB 0  
PC 1.40

125299

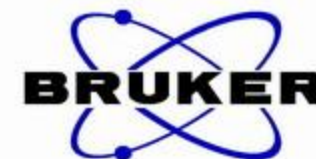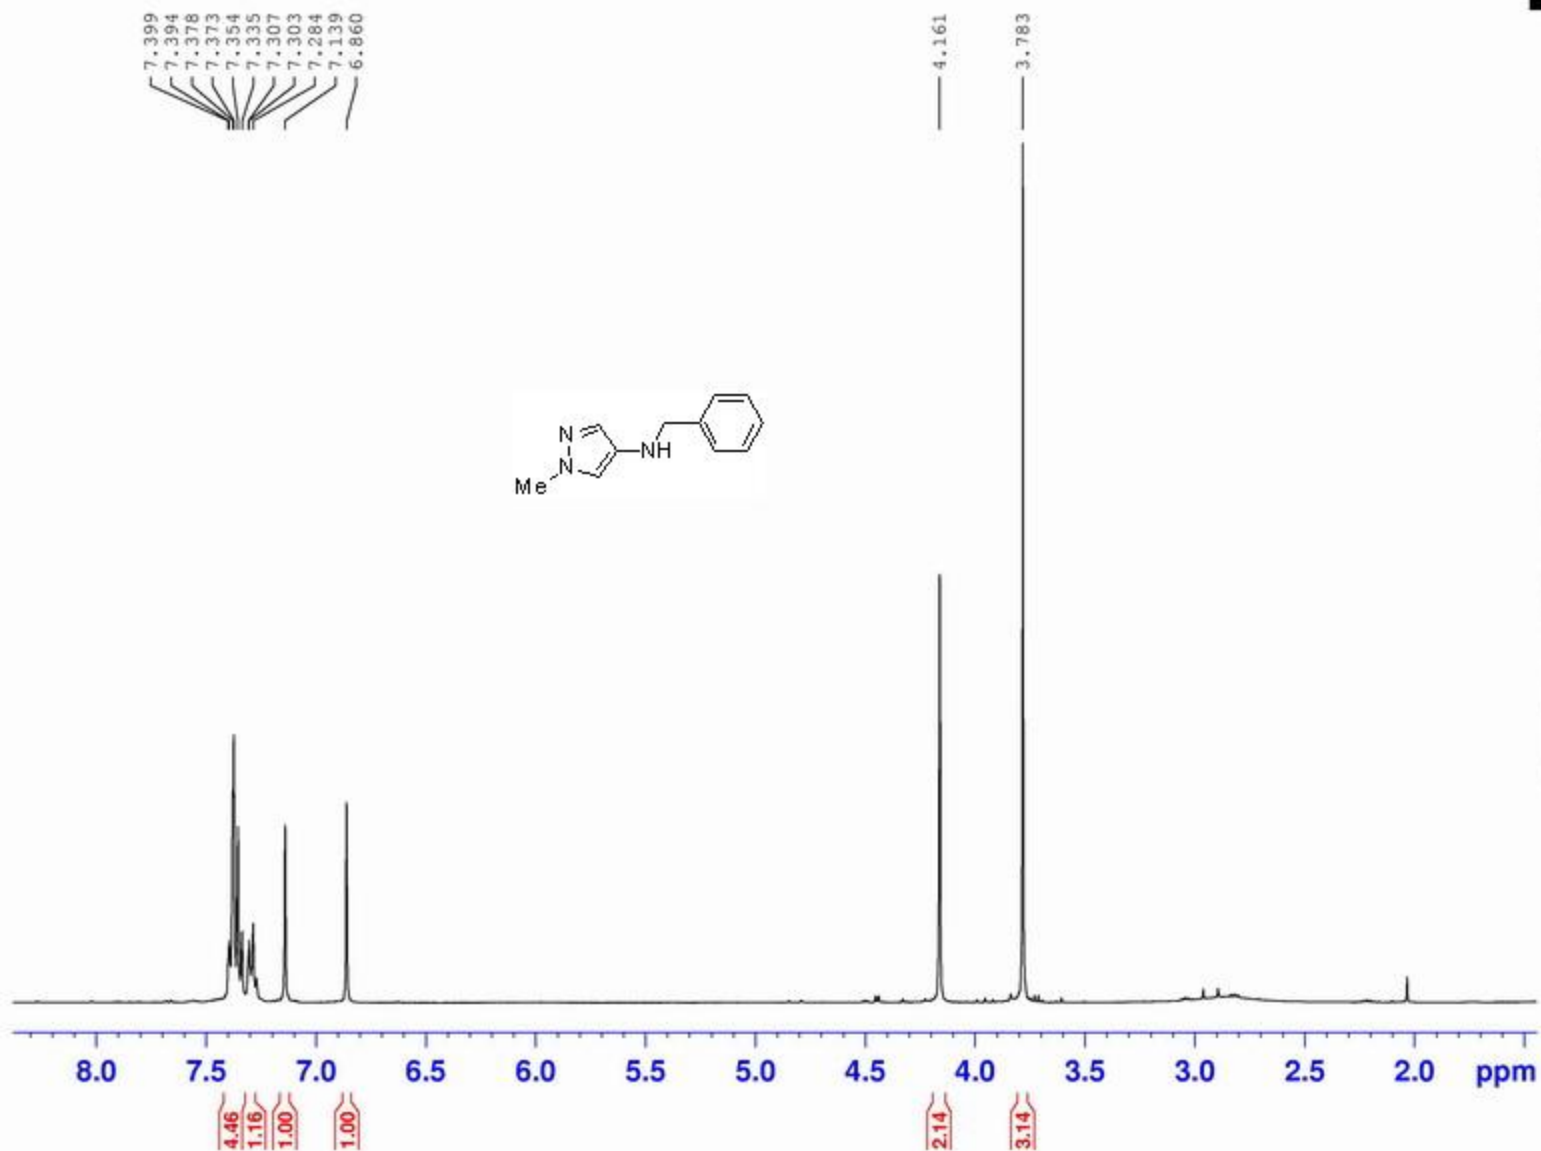

Current Data Parameters  
NAME wdp  
EXPNO 303  
PROCNO 1

F2 - Acquisition Parameters  
Date\_ 20080927  
Time 16.38  
INSTRUM spect  
PROBHD 5 mm PABBO BB-  
PULPROG zg30  
TD 65536  
SOLVENT CDCl3  
NS 10  
DS 2  
SWH 8278.146 Hz  
FIDRES 0.126314 Hz  
AQ 3.9584243 sec  
RG 80.6  
DW 60.400 usec  
DE 6.00 usec  
TE 301.5 K  
D1 1.00000000 sec  
TD0 1

----- CHANNEL f1 -----  
NUC1 1H  
P1 13.60 usec  
PL1 0.00 dB  
SFO1 400.1324710 MHz

F2 - Processing parameters  
SI 32768  
SF 400.1300000 MHz  
WDW EM  
SSB 0  
LB 0.30 Hz  
GB 0  
PC 1.00

125299

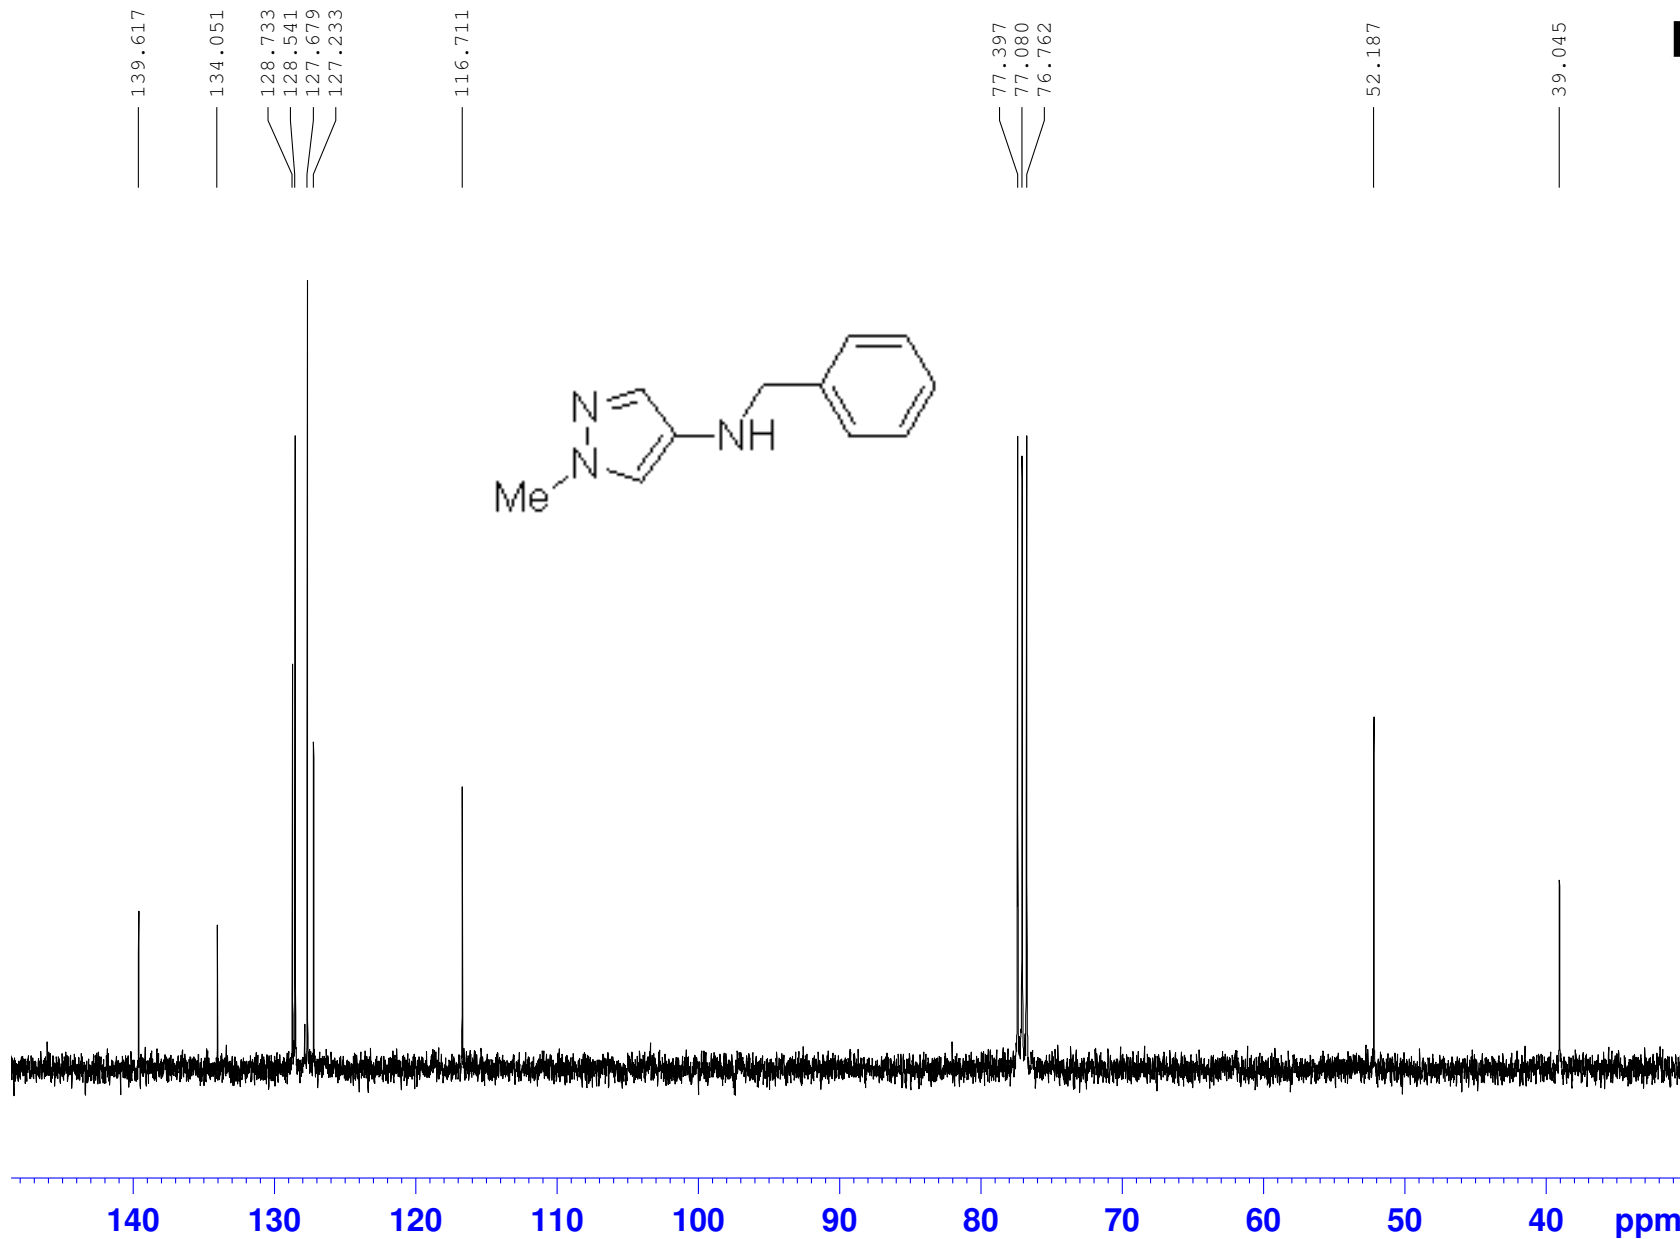

```
Current Data Parameters
NAME          wdp
EXPNO         304
PROCNO        1

F2 - Acquisition Parameters
Date_         20080927
Time          16.43
INSTRUM       spect
PROBHD        5 mm PABBO BB-
PULPROG       zgpg30
TD            65536
SOLVENT       CDCl3
NS            49
DS            4
SWH           23980.814 Hz
FIDRES        0.365918 Hz
AQ            1.3664756 sec
RG            1448.2
DW            20.850 usec
DE            6.00 usec
TE            301.9 K
D1            2.00000000 sec
d11           0.03000000 sec
DELTA         1.89999998 sec
TD0           1

===== CHANNEL f1 =====
NUC1          13C
P1            12.20 usec
PL1           1.00 dB
SFO1          100.6228298 MHz

===== CHANNEL f2 =====
CPDPRG2       waltz16
NUC2          1H
PCPD2         80.00 usec
PL2           0.00 dB
PL12          15.39 dB
PL13          15.50 dB
SFO2          400.1316005 MHz

F2 - Processing parameters
SI            32768
SF            100.6127690 MHz
WDW           EM
SSB           0
LB            1.00 Hz
GB            0
PC            1.40
```

125301

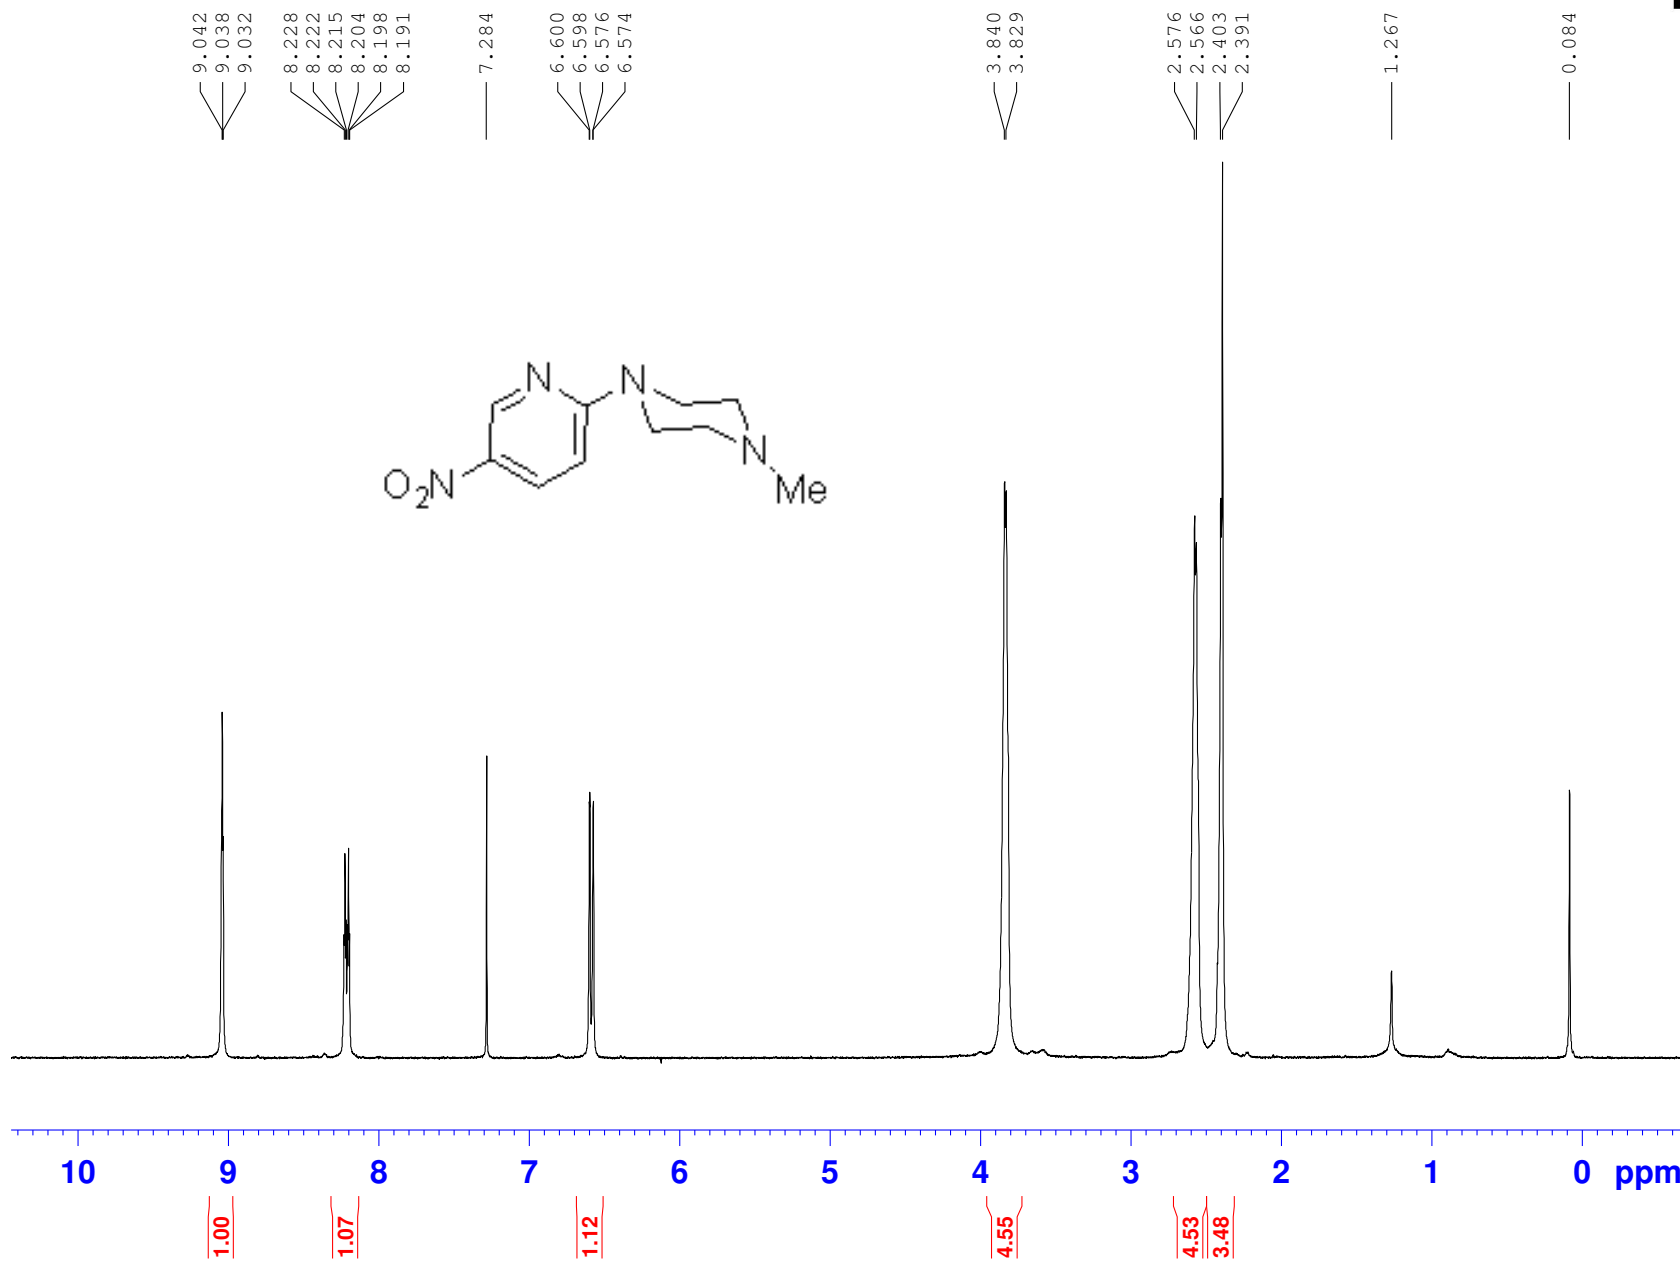

```
Current Data Parameters
NAME          wdp
EXPNO         313
PROCNO        1

F2 - Acquisition Parameters
Date_         20080927
Time          20.44
INSTRUM       spect
PROBHD        5 mm PABBO BB-
PULPROG       zg30
TD            65536
SOLVENT       CDCl3
NS            6
DS            2
SWH           8278.146 Hz
FIDRES        0.126314 Hz
AQ            3.9584243 sec
RG            228.1
DW            60.400 usec
DE            6.00 usec
TE            301.7 K
D1            1.00000000 sec
TD0           1

===== CHANNEL f1 =====
NUC1           1H
P1            13.60 usec
PL1           0.00 dB
SFO1          400.1324710 MHz

F2 - Processing parameters
SI            32768
SF            400.1300000 MHz
WDW           EM
SSB           0
LB            0.30 Hz
GB            0
PC            1.00
```

125301

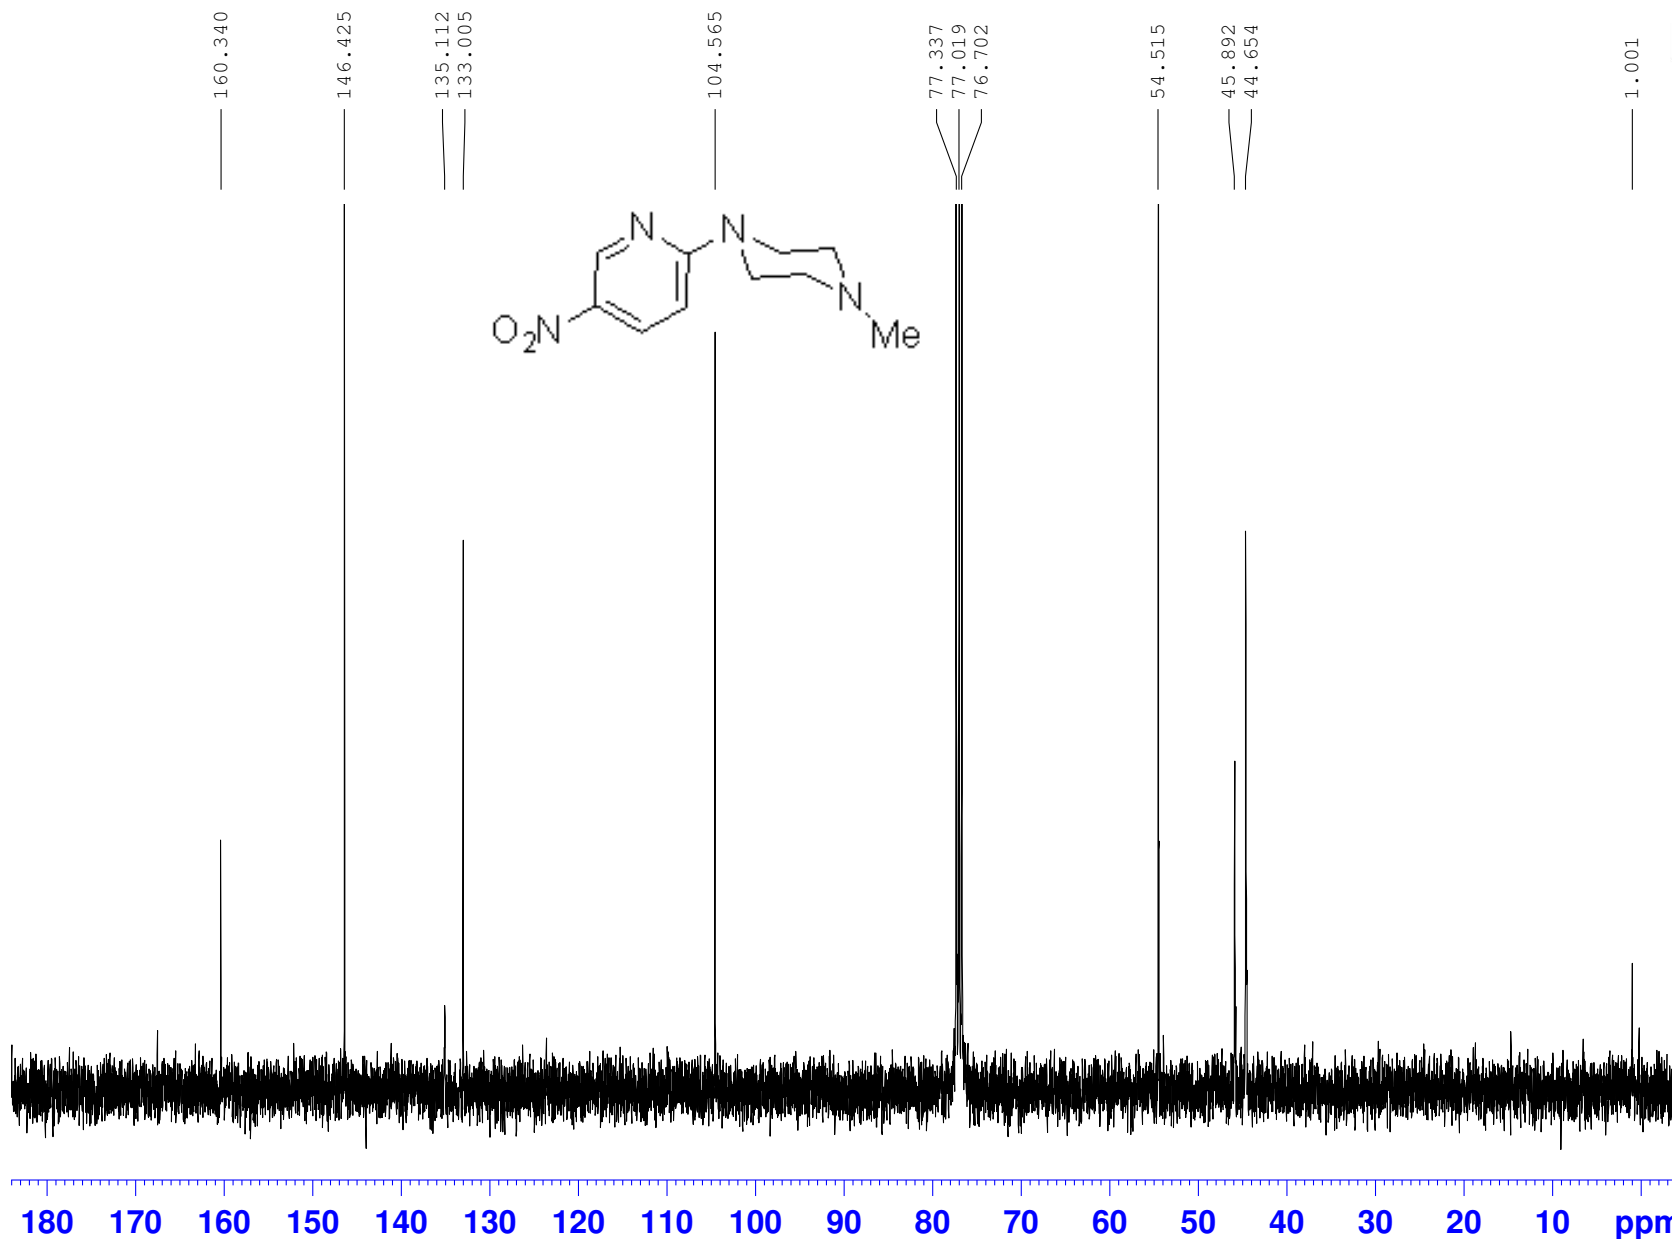

Current Data Parameters  
NAME wdp  
EXPNO 314  
PROCNO 1

F2 - Acquisition Parameters  
Date\_ 20080927  
Time 20.49  
INSTRUM spect  
PROBHD 5 mm PABBO BB-  
PULPROG zgpg30  
TD 65536  
SOLVENT CDCl3  
NS 472  
DS 4  
SWH 23980.814 Hz  
FIDRES 0.365918 Hz  
AQ 1.3664756 sec  
RG 1290.2  
DW 20.850 usec  
DE 6.00 usec  
TE 302.0 K  
D1 2.00000000 sec  
d11 0.03000000 sec  
DELTA 1.89999998 sec  
TD0 1

==== CHANNEL f1 =====  
NUC1 13C  
P1 12.20 usec  
PL1 1.00 dB  
SFO1 100.6228298 MHz

==== CHANNEL f2 =====  
CPDPRG2 waltz16  
NUC2 1H  
PCPD2 80.00 usec  
PL2 0.00 dB  
PL12 15.39 dB  
PL13 15.50 dB  
SFO2 400.1316005 MHz

F2 - Processing parameters  
SI 32768  
SF 100.6127690 MHz  
WDW EM  
SSB 0  
LB 1.00 Hz  
GB 0  
PC 1.40



125302

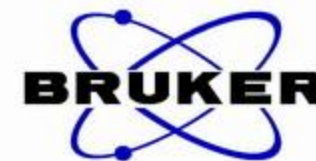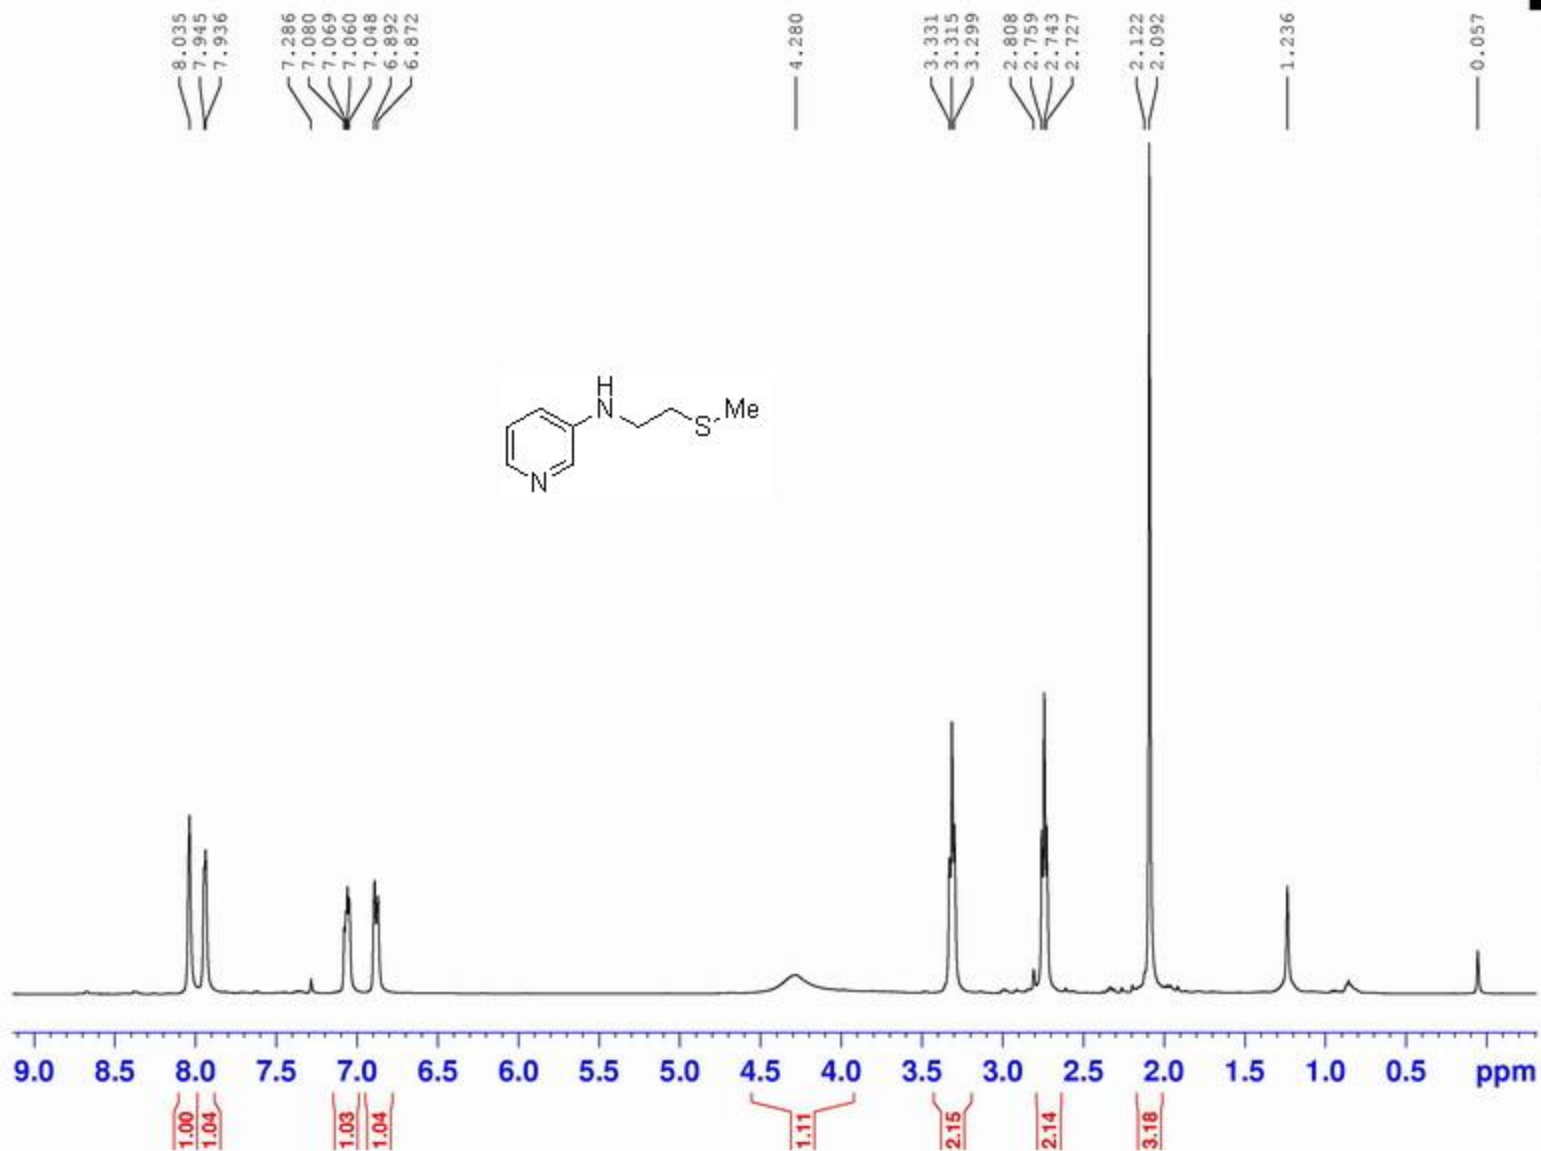

```

Current Data Parameters
NAME                wdp
EXPNO               296
PROCNO             1

F2 - Acquisition Parameters
Date_              20080910
Time              13.21
INSTRUM           spect
PROBHD            5 mm PABBO BB-
PULPROG          zg30
TD               65536
SOLVENT          CDCl3
NS              12
DS              2
SWH             8278.146 Hz
FIDRES         0.126314 Hz
AQ             3.9584243 sec
RG              45.3
DW             60.400 usec
DE             6.00 usec
TE             303.4 K
D1             1.00000000 sec
TD0            1

----- CHANNEL f1 -----
NUC1             1H
P1              13.60 usec
PL1             0.00 dB
SFO1           400.1324710 MHz

F2 - Processing parameters
SI              32768
SF             400.1300000 MHz
WDW            EM
SSB            0
LB             1.00 Hz
GB            0
PC            1.00
  
```

125302



143.894  
138.779  
135.980  
123.768  
118.917  
77.466  
77.148  
76.830  
41.505  
33.418  
15.003

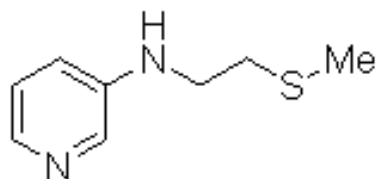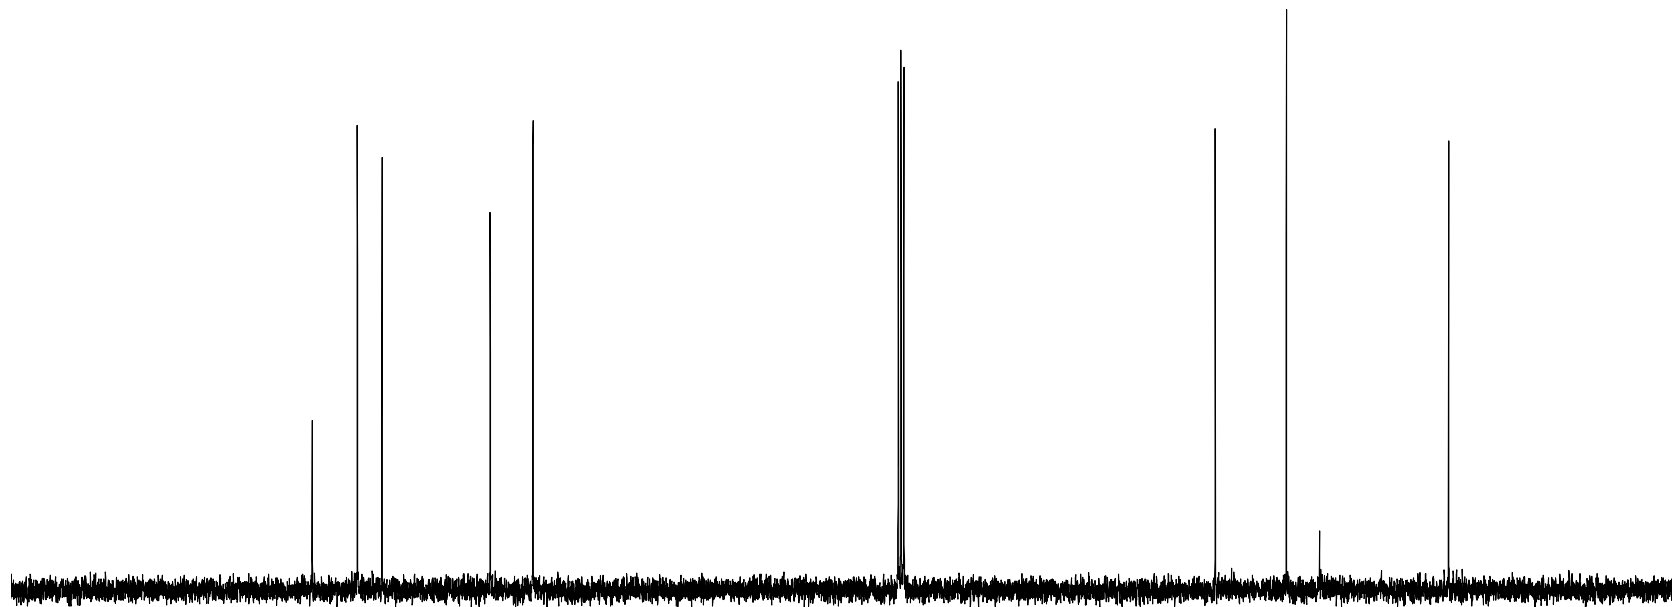

170 160 150 140 130 120 110 100 90 80 70 60 50 40 30 20 10 0 ppm

```
Current Data Parameters
NAME      wdp
EXPNO     297
PROCNO    1

F2 - Acquisition Parameters
Date_     20080910
Time      13.28
INSTRUM   spect
PROBHD    5 mm PABBO BB-
PULPROG   zgpg30
TD         65536
SOLVENT   CDCl3
NS         42
DS         4
SWH        23980.814 Hz
FIDRES     0.365918 Hz
AQ         1.3664756 sec
RG         912.3
DW         20.850 usec
DE         6.00 usec
TE         303.5 K
D1         2.00000000 sec
d11        0.03000000 sec
DELTA      1.89999998 sec
TD0        1

===== CHANNEL f1 =====
NUC1       13C
P1         12.20 usec
PL1        1.00 dB
SFO1       100.6228298 MHz

===== CHANNEL f2 =====
CPDPRG2    waltz16
NUC2       1H
PCPD2      80.00 usec
PL2        0.00 dB
PL12       15.39 dB
PL13       15.50 dB
SFO2       400.1316005 MHz

F2 - Processing parameters
SI         32768
SF         100.6127690 MHz
WDW        EM
SSB        0
LB         1.00 Hz
GB         0
PC         1.40
```

125309



8.139  
8.129  
8.127  
7.456  
7.451  
7.437  
7.434  
7.431  
7.417  
7.412  
7.284  
7.226  
7.223  
7.213  
7.210  
7.034  
7.032  
7.026  
7.024  
6.984  
6.975  
6.971  
6.962  
6.646  
6.645  
6.632  
6.629  
6.615  
6.614  
6.458  
6.438

5.075

4.723  
4.708

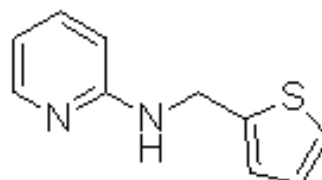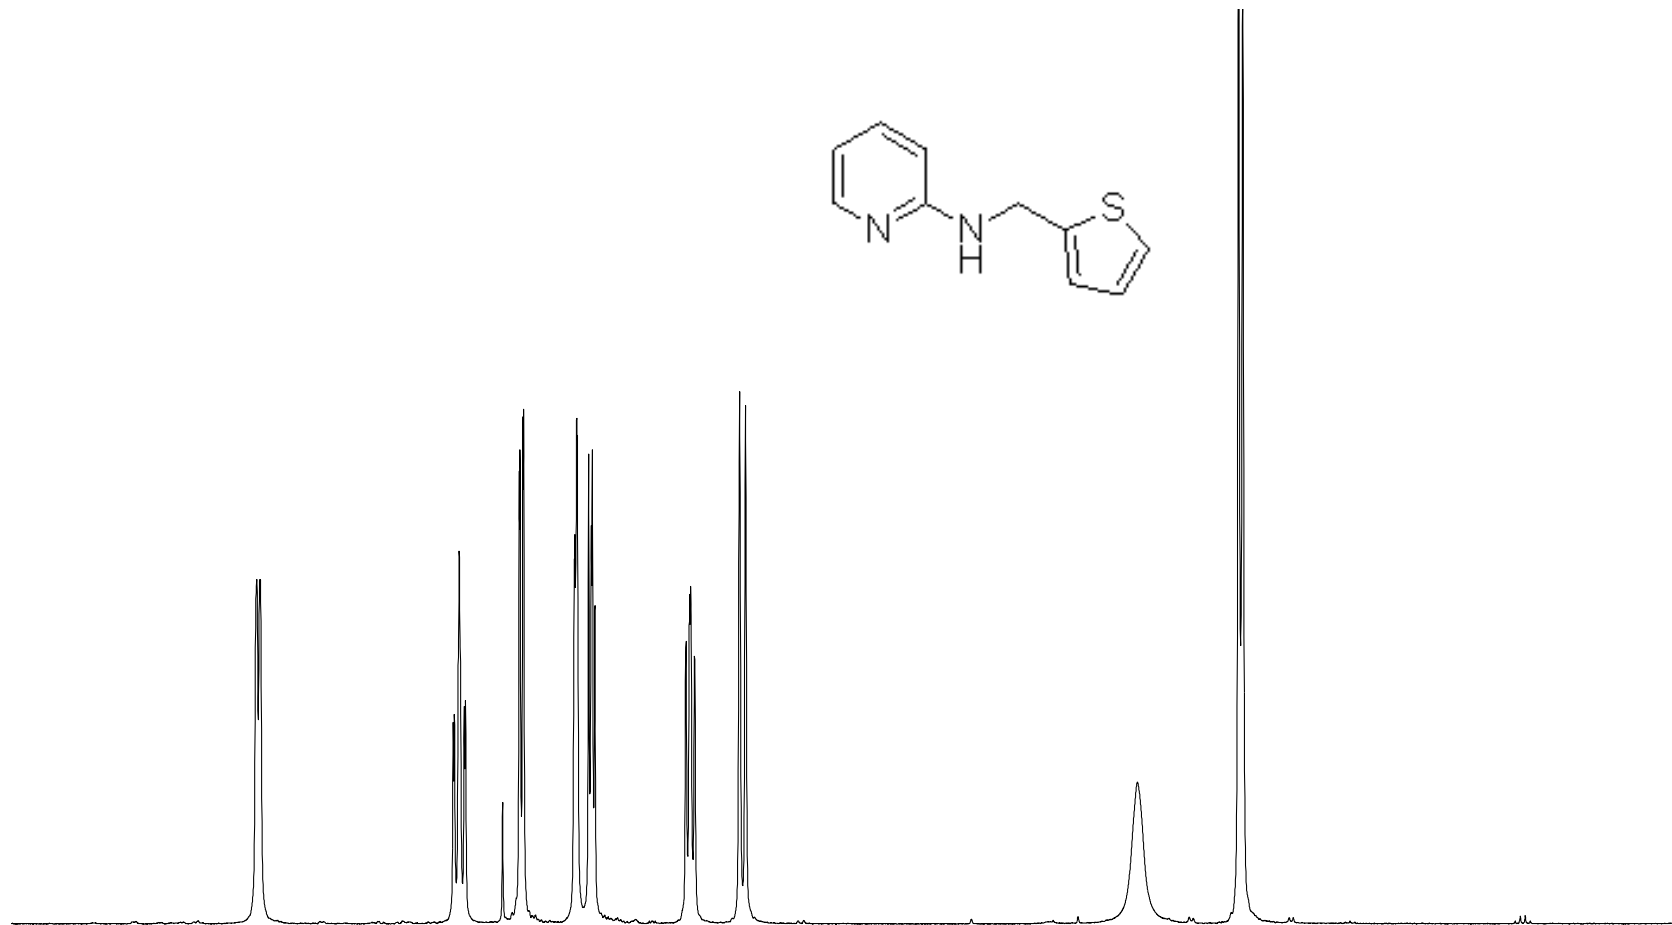

8.5 8.0 7.5 7.0 6.5 6.0 5.5 5.0 4.5 4.0 ppm

1.03

1.01

0.98

0.96

1.01

1.00

1.02

0.99

2.09

Current Data Parameters  
NAME wdp  
EXPNO 319  
PROCNO 1

F2 - Acquisition Parameters  
Date\_ 20080927  
Time 22.14  
INSTRUM spect  
PROBHD 5 mm PABBO BB-  
PULPROG zg30  
TD 65536  
SOLVENT CDCl3  
NS 5  
DS 2  
SWH 8278.146 Hz  
FIDRES 0.126314 Hz  
AQ 3.9584243 sec  
RG 101.6  
DW 60.400 usec  
DE 6.00 usec  
TE 300.9 K  
D1 1.00000000 sec  
TD0 1

==== CHANNEL f1 =====  
NUC1 1H  
P1 13.60 usec  
PL1 0.00 dB  
SFO1 400.1324710 MHz

F2 - Processing parameters  
SI 32768  
SF 400.1300000 MHz  
WDW EM  
SSB 0  
LB 0.30 Hz  
GB 0  
PC 1.00

125309

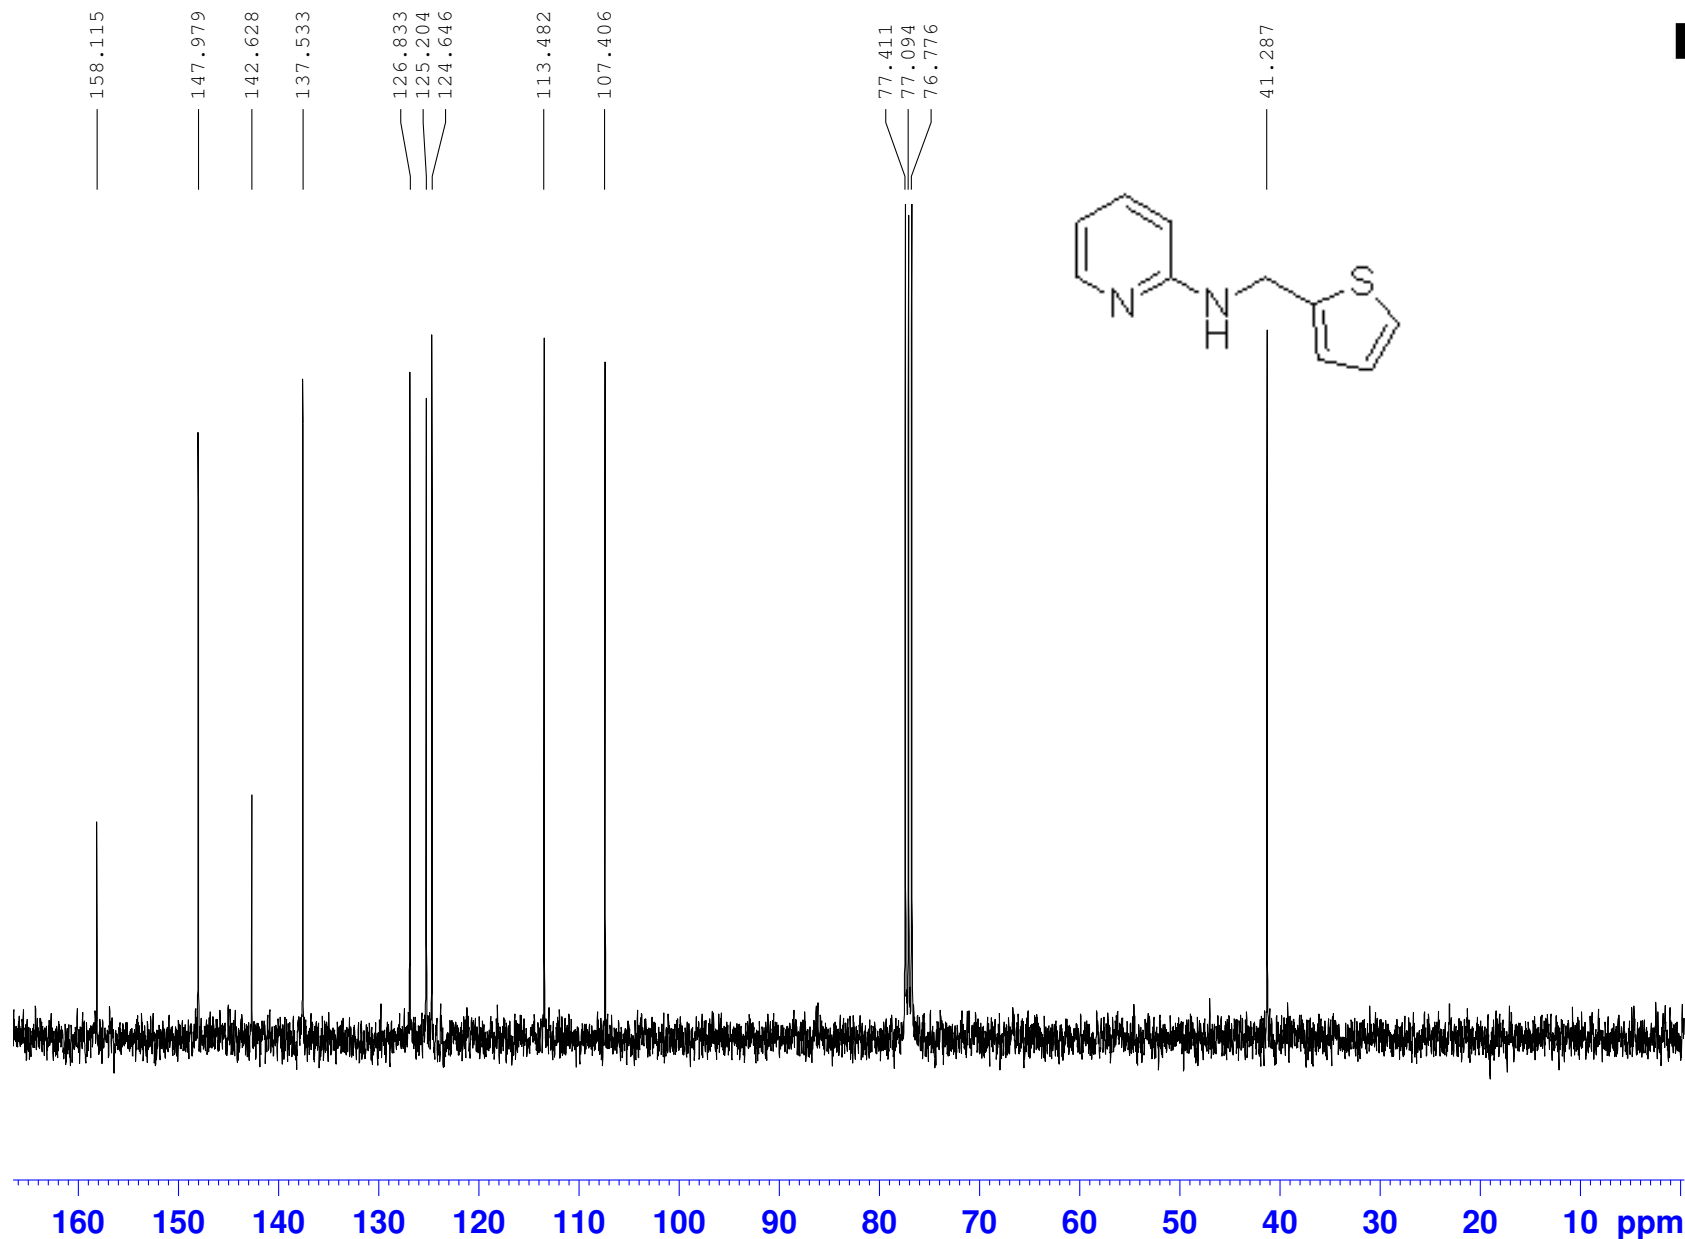

Current Data Parameters  
NAME wdp  
EXPNO 320  
PROCNO 1

F2 - Acquisition Parameters  
Date\_ 20080927  
Time 22.19  
INSTRUM spect  
PROBHD 5 mm PABBO BB-  
PULPROG zgpg30  
TD 65536  
SOLVENT CDCl3  
NS 38  
DS 4  
SWH 23980.814 Hz  
FIDRES 0.365918 Hz  
AQ 1.3664756 sec  
RG 1149.4  
DW 20.850 usec  
DE 6.00 usec  
TE 301.1 K  
D1 2.00000000 sec  
d11 0.03000000 sec  
DELTA 1.89999998 sec  
TD0 1

==== CHANNEL f1 =====  
NUC1 13C  
P1 12.20 usec  
PL1 1.00 dB  
SFO1 100.6228298 MHz

==== CHANNEL f2 =====  
CPDPRG2 waltz16  
NUC2 1H  
PCPD2 80.00 usec  
PL2 0.00 dB  
PL12 15.39 dB  
PL13 15.50 dB  
SFO2 400.1316005 MHz

F2 - Processing parameters  
SI 32768  
SF 100.6127690 MHz  
WDW EM  
SSB 0  
LB 2.00 Hz  
GB 0  
PC 1.40

125310



7.283  
7.174  
7.166  
7.161  
7.154

6.632  
6.628  
6.619  
6.615

5.959  
5.955  
5.951  
5.948

3.765  
3.753  
3.741  
3.728

3.192  
3.175  
3.159

2.542  
2.525  
2.508

1.871  
1.854  
1.838  
1.821  
1.805

0.087

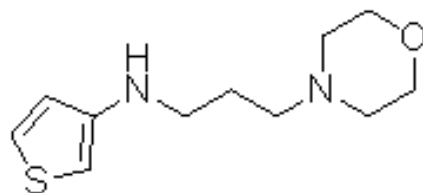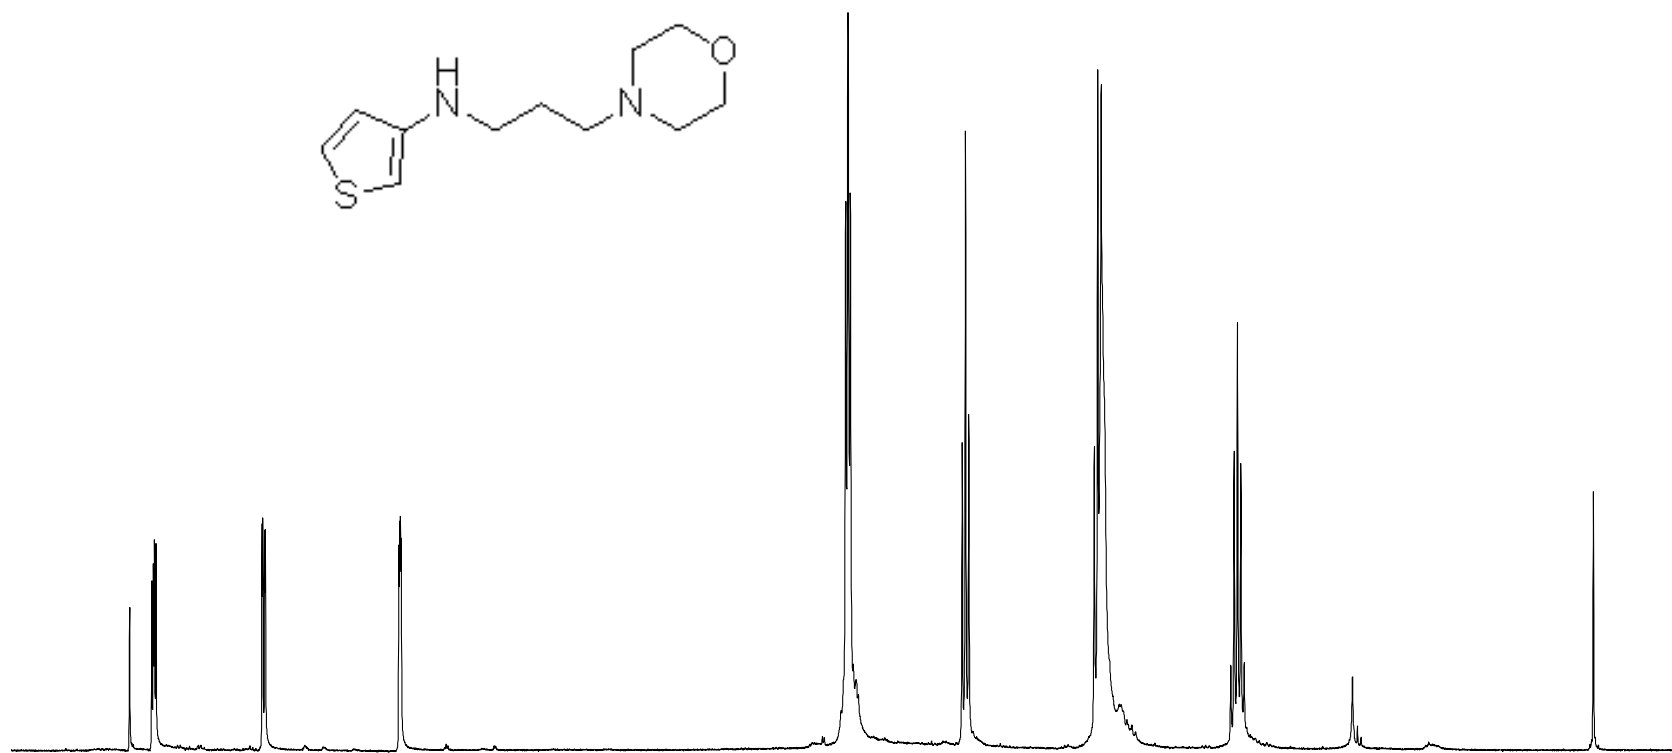

7.5 7.0 6.5 6.0 5.5 5.0 4.5 4.0 3.5 3.0 2.5 2.0 1.5 1.0 0.5 ppm

0.96

1.00

1.00

4.52

2.18

7.06

2.31

```
Current Data Parameters
NAME          wdp
EXPNO         321
PROCNO        1

F2 - Acquisition Parameters
Date_         20080927
Time          22.28
INSTRUM       spect
PROBHD        5 mm PABBO BB-
PULPROG       zg30
TD            65536
SOLVENT       CDCl3
NS            4
DS            2
SWH           8278.146 Hz
FIDRES        0.126314 Hz
AQ            3.9584243 sec
RG            80.6
DW            60.400 usec
DE            6.00 usec
TE            300.9 K
D1            1.00000000 sec
TD0           1

===== CHANNEL f1 =====
NUC1           1H
P1             13.60 usec
PL1            0.00 dB
SFO1           400.1324710 MHz

F2 - Processing parameters
SI             32768
SF            400.1300000 MHz
WDW            no
SSB            0
LB             0.00 Hz
GB             0
PC             1.00
```

125310

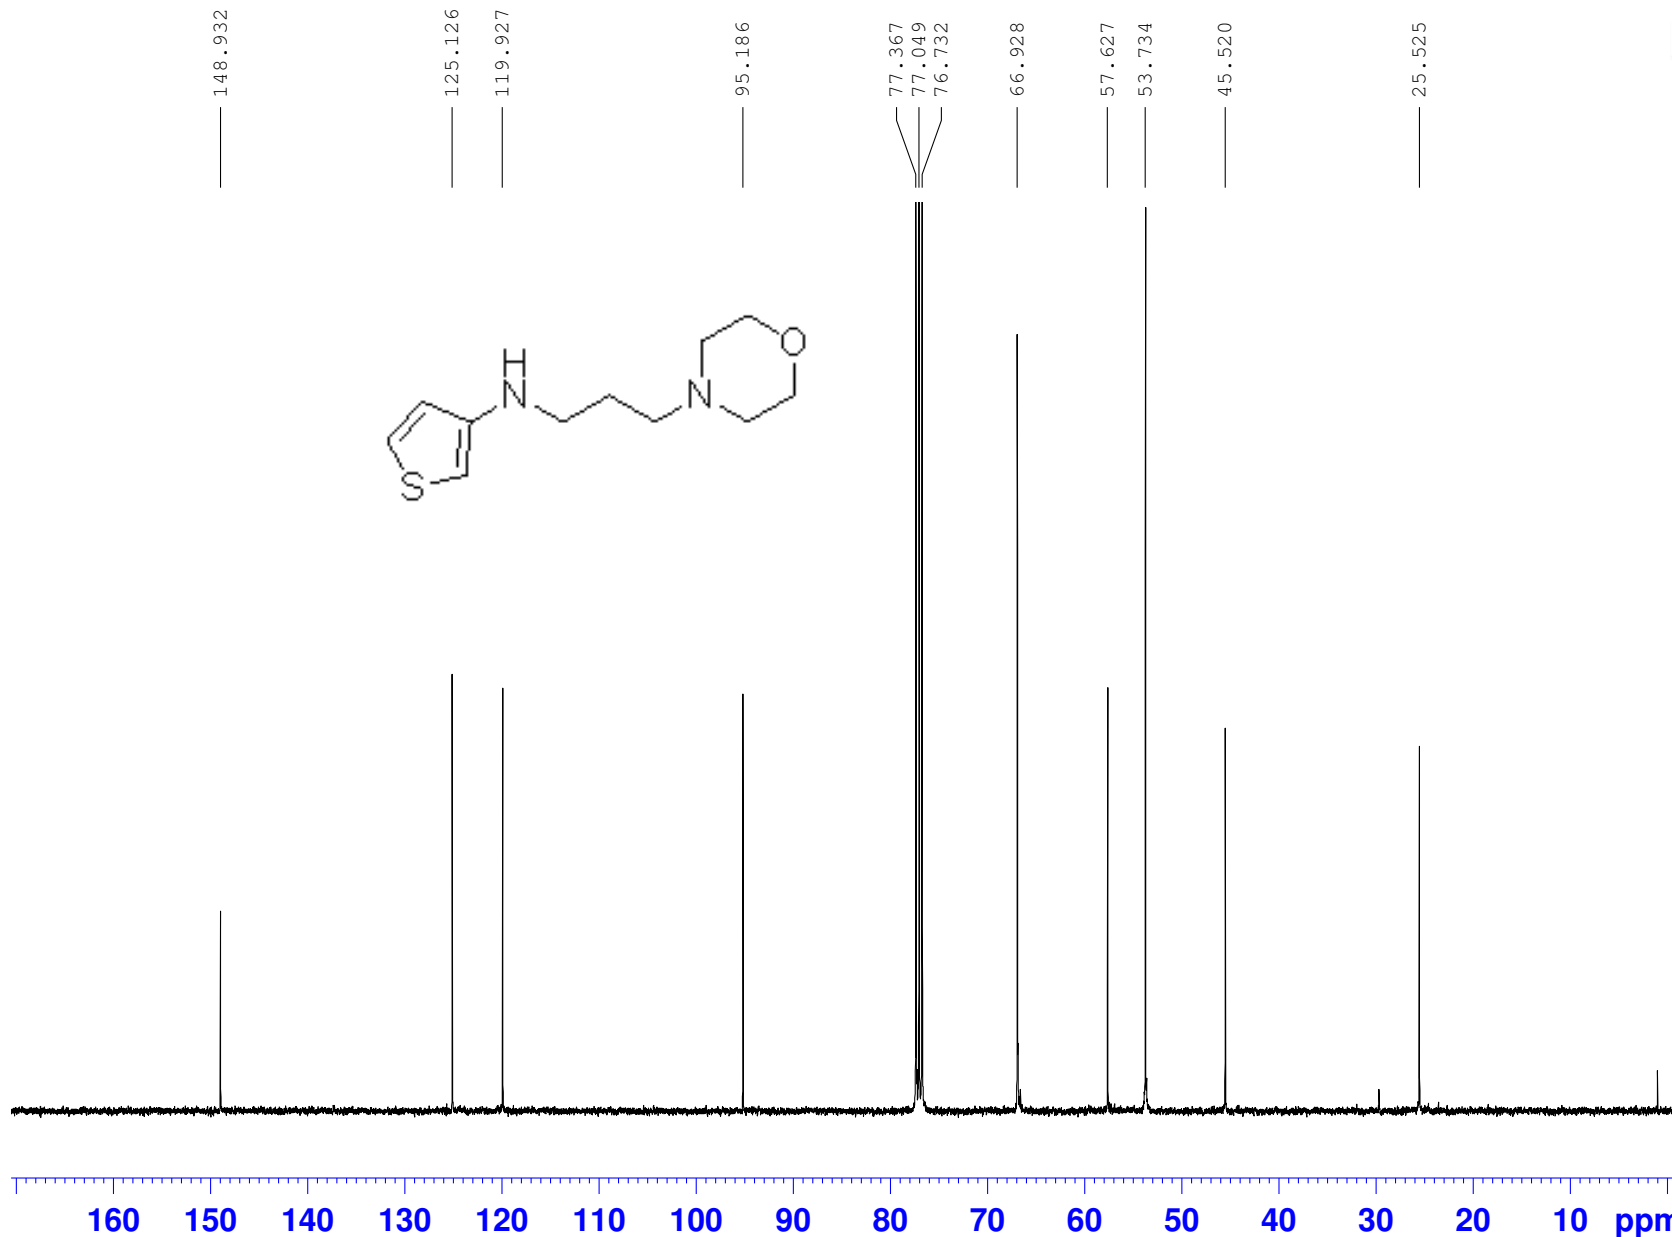

```
Current Data Parameters
NAME          wdp
EXPNO         322
PROCNO        1

F2 - Acquisition Parameters
Date_         20080928
Time          0.29
INSTRUM       spect
PROBHD        5 mm PABBO BB-
PULPROG       zgpg30
TD            65536
SOLVENT       CDCl3
NS            2048
DS            4
SWH           23980.814 Hz
FIDRES        0.365918 Hz
AQ            1.3664756 sec
RG            724.1
DW            20.850 usec
DE            6.00 usec
TE            301.9 K
D1            2.00000000 sec
d11           0.03000000 sec
DELTA         1.89999998 sec
TD0           1

===== CHANNEL f1 =====
NUC1          13C
P1            12.20 usec
PL1           1.00 dB
SFO1          100.6228298 MHz

===== CHANNEL f2 =====
CPDPRG2       waltz16
NUC2           1H
PCPD2         80.00 usec
PL2            0.00 dB
PL12          15.39 dB
PL13          15.50 dB
SFO2          400.1316005 MHz

F2 - Processing parameters
SI            32768
SF            100.6127690 MHz
WDW           EM
SSB           0
LB            1.00 Hz
GB            0
PC            1.40
```

#### Amination of Aryl and Heteroaryl Bromides Table 4.

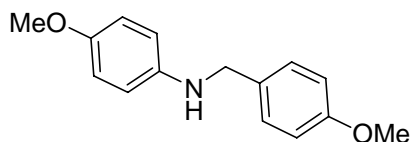

**N-(4-methoxybenzyl)-4-methoxybenzenamine (9a).** Following Procedure B, 1-bromo-4-methoxybenzene (187 mg, 1.0 mmol) was allowed to react with 4-methoxybenzylamine (206 mg, 1.5 mmol) for 14 h. The crude brown oil was purified by flash chromatography on silica gel eluent (15:1 petroleum ether: ethyl acetate) to provide 85 % yield of the desired product as a white solid.  $^1\text{H NMR}(\text{CDCl}_3)$ :  $\delta=7.31$  (d,  $J=8.4$  Hz, 2 H; Phenyl), 6.89 (d,  $J=8.4$  Hz, 2 H; Phenyl), 6.79 (d,  $J=9.2$  Hz, 2 H; Phenyl), 6.65 (d,  $J=9.2$  Hz, 2 H; Phenyl), 4.24 (s, 2 H;  $\text{CH}_2$ ), 3.83 (s, 3 H;  $\text{CH}_3$ ), 3.77 ppm (s, 3 H;  $\text{CH}_3$ );  $^{13}\text{C NMR}(\text{CDCl}_3)$ :  $\delta=158.9$ , 152.5, 142.0, 131.4, 128.9, 114.9, 114.5, 114.0 (Phenyl), 55.8 ( $\text{CH}_2$ ), 55.3 ( $\text{CH}_3$ ), 48.9, ppm ( $\text{CH}_3$ ); GC/MS: rt = 10.01 min, M/Z = 243.

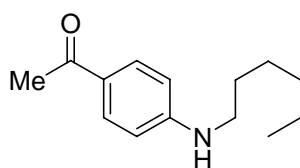

**N-n-hexyl-4-acetylbenzenamine (9b).** Following Procedure B, 1-(4-bromophenyl)ethanone (199 mg, 1.0 mmol) was allowed to react with *n*-hexanamine (152 mg, 1.5 mmol) for 8 h. The crude brown oil was purified by flash chromatography on silica gel eluent (10:1 petroleum ether: ethyl acetate) to provide 95 % yield of the desired product as a white solid.  $^1\text{H NMR}(\text{CDCl}_3)$ :  $\delta=7.81$  (d,  $J=8.8$  Hz, 2 H; Phenyl), 6.55 (d,  $J=8.8$  Hz, 2 H; Phenyl), 4.47 (br s, 1 H; NH), 3.15 (t,  $J=7.6$  Hz, 2 H;  $-\text{NH}-\text{CH}_2$ ), 2.49 (s, 3 H;  $\text{CH}_3$ ), 1.67-1.59 (m, 2 H;  $\text{CH}_2$ ), 1.42-1.27 (m, 6 H;  $\text{CH}_2$ ), 0.91 ppm (m, 3 H;  $\text{CH}_3$ );  $^{13}\text{C NMR}(\text{CDCl}_3)$ :  $\delta=196.3$  ( $-\text{C}=\text{O}$ ), 152.4, 130.8, 126.4, 111.3 (Phenyl), 43.4 ( $-\text{NH}-\text{CH}_2$ ), 31.6 ( $\text{CH}_3$ ), 29.2, 26.7, 25.9, 22.6 ( $\text{CH}_2$ ), 14.0 ppm ( $\text{CH}_3$ ); GC/MS: rt = 9.27 min, M/Z = 219.

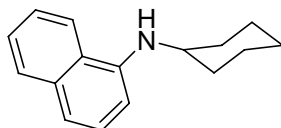

**1-(N-cyclohexyl)naphthalenamine (9c).** Following Procedure B, 1-bromonaphthalene (207 mg, 1.0 mmol) was allowed to react with cyclohexanamine (149 mg, 1.5 mmol) for 18 h. The crude brown oil was purified by flash chromatography on silica gel eluent (100:1 petroleum ether: ethyl acetate) to provide 83 % yield of the desired product as a colourless oil.  $^1\text{H NMR}(\text{CDCl}_3)$ :  $\delta=7.87$ -7.83 (m, 2 H; Phenyl), 7.52-7.45 (m, 2 H; Phenyl), 7.38 (t,  $J=8.0$  Hz, 1 H; Phenyl), 7.25 (d,  $J=8.0$  Hz, 1 H; Phenyl), 6.71 (d,  $J=7.6$  Hz, 1 H; Phenyl), 4.38 (br s, 1 H; NH), 3.57-3.49 (m, 1 H;  $-\text{NH}-\text{CH}-$ ), 2.22 (m, 2 H;  $\text{CH}_2$ ), 2.19-1.85 (m, 2 H;  $\text{CH}_2$ ), 1.78-1.73 (m, 1 H;  $\text{CH}_2$ ), 1.56-1.41 ppm (m, 5 H;  $\text{CH}_2$ );  $^{13}\text{C NMR}(\text{CDCl}_3)$ :  $\delta=142.3$ , 134.6, 128.7, 126.7, 125.6, 124.5, 123.5, 119.9, 116.8, 104.9 (Phenyl), 51.9 ( $-\text{NH}-\text{CH}-$ ), 33.3, 26.1, 25.1 ppm ( $\text{CH}_2$ ); GC/MS: rt = 9.66 min, M/Z = 225.

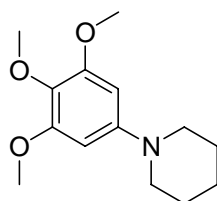

**1-piperidine-3,4,5-trimethoxyphenyl (9d).** Following Procedure B, 5-bromo-1,2,3-trimethoxybenzene (247 mg, 1.0 mmol) was allowed to react with piperidine (128 mg, 1.5 mmol) for 20 h. The crude brown oil was purified by flash

chromatography on silica gel eluent (10:1 petroleum ether: ethyl acetate) to provide 80 % yield of the desired product as a pale yellow oil.  $^1\text{H}$  NMR( $\text{CDCl}_3$ ):  $\delta$ =6.22 (s, 2 H; Phenyl), 3.86 (s, 6 H;  $\text{CH}_3$ ), 3.80 (s, 3 H;  $\text{CH}_3$ ), 3.09 (t,  $J$ =5.6 Hz, 4 H; -N- $\text{CH}_2$ ), 1.78-1.72 (m, 4 H;  $\text{CH}_2$ ), 1.61-1.58 ppm (m, 2 H;  $\text{CH}_2$ );  $^{13}\text{C}$  NMR( $\text{CDCl}_3$ ):  $\delta$ =153.5, 149.6, 132.1, 95.3 (Phenyl), 60.9 ( $\text{CH}_3$ ), 56.1 ( $\text{CH}_3$ ), 51.8 (-N- $\text{CH}_2$ -), 25.9, 24.2 ppm ( $\text{CH}_2$ ); GC/MS: rt = 9.01 min, M/Z = 251.

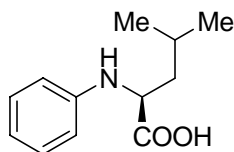

**(S)-4-methyl-2-(phenylamino)pentanoic acid<sup>6</sup> (9e).** Following Procedure B, bromobenzene (157 mg, 1.0 mmol) was allowed to react with (S)-2-amino-4-methylpentanoic acid (197 mg, 1.5 mmol) for 12 h. The crude brown oil was purified by flash chromatography on silica gel eluent (10:1 petroleum ether: ethyl acetate) to provide 93 % yield of the desired product as a white solid.  $^1\text{H}$  NMR( $d$ -DMSO):  $\delta$ =7.05 (t,  $J$ =8.0 Hz, 2 H; Phenyl), 6.53 (m, 3 H; Phenyl), 3.83 (m, 1 H; -N-CH-), 1.78 (m, 1 H; -CH- $\text{CH}_3$ ), 1.64-1.57 (m, 2 H;  $\text{CH}_2$ ), 0.94 (d,  $J$ =6.8 Hz, 3 H;  $\text{CH}_3$ ), 0.88 ppm (d,  $J$ =6.4 Hz, 3 H;  $\text{CH}_3$ );  $^{13}\text{C}$  NMR( $d$ -DMSO):  $\delta$ =176.3, 148.5, 129.3, 116.6, 112.8 (Phenyl), 54.7 (-N-CH-), 41.6 (-CH- $\text{CH}_3$ ), 24.9 ( $\text{CH}_2$ ), 23.2 ( $\text{CH}_3$ ), 22.2 ppm ( $\text{CH}_3$ );  $[\alpha]_D^{18} = -48.0^\circ$  (c 0.80, acetone), literature:  $-45.0^\circ$ ; MS (APCI): M/Z: 206 [M-].

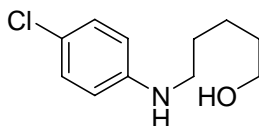

**5-(4-chlorophenylamino)-1-pentanol (9f).** Following Procedure B, 1-bromo-4-chlorobenzene (191 mg, 1.0 mmol) was allowed to react with 5-amino-1-pentanol (155 mg, 1.5 mmol) for 17 h. The crude brown oil was purified by flash chromatography on silica gel eluent (10:1 petroleum ether: ethyl acetate) to provide 87 % yield of the desired product as a pale yellow oil.  $^1\text{H}$  NMR( $\text{CDCl}_3$ ):  $\delta$ =7.11 (m, 2 H; Phenyl), 6.54 (m, 2 H; Phenyl), 3.66 (t,  $J$ =6.4 Hz, 2 H; -O- $\text{CH}_2$ -), 3.09 (t,  $J$ =7.2 Hz, 2 H; -N- $\text{CH}_2$ -), 2.58 (br s, 2 H; NH and OH), 1.70-1.59 (m, 4 H;  $\text{CH}_2$ ), 1.53-1.47 ppm (m, 2 H;  $\text{CH}_2$ );  $^{13}\text{C}$  NMR( $\text{CDCl}_3$ ):  $\delta$ =146.7, 129.1, 122.0, 114.0 (Phenyl), 62.7 (-O- $\text{CH}_2$ -), 44.2 (-N- $\text{CH}_2$ -), 32.4, 29.1, 23.3 ppm ( $\text{CH}_2$ ); GC/MS: rt = 8.94 min, M/Z = 213.

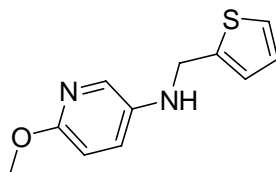

**3-[N-(2-methylthiophen)]-6-methoxy-pyridinamine (9g).** Following Procedure B, 5-bromo-2-methoxypyridine (188 mg, 1.0 mmol) was allowed to react with thiophen-2-ylmethanamine (170 mg, 1.5 mmol) for 18 h. The crude brown oil was purified by flash chromatography on silica gel eluent (10:1 petroleum ether: ethyl acetate) to provide 92 % yield of the desired product as a white solid.  $^1\text{H}$  NMR( $\text{CDCl}_3$ ):  $\delta$ =7.66 (s, 1 H; Phenyl), 7.22 (d,  $J$ =5.2 Hz, 1 H; Phenyl), 7.06-6.96 (m, 3 H; Phenyl), 6.63 (d,  $J$ =8.8 Hz, 1 H; Phenyl), 4.48 (s, 2 H;  $\text{CH}_2$ ), 3.88 (s, 3 H;  $\text{CH}_3$ ), 3.74 ppm (br s, 1 H; NH);  $^{13}\text{C}$  NMR( $\text{CDCl}_3$ ):  $\delta$ =157.8, 142.5, 138.4, 130.9, 126.9, 126.3, 125.2, 124.8, 110.8 (Phenyl), 53.4 ( $\text{CH}_2$ ), 44.4 ppm ( $\text{CH}_3$ ); GC/MS: rt = 8.84 min, M/Z = 220.



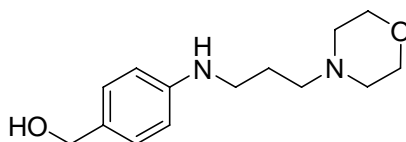

**4-(3-morpholinopropylamino)-benzyl alcohol (9h).** Following Procedure B, 4-bromobenzyl alcohol (187 mg, 1.0 mmol) was allowed to react with 1-(3-morpholino)propanamine (216 mg, 1.5 mmol) for 17 h. The crude brown oil was purified by flash chromatography on silica gel eluent (30:1 CH<sub>2</sub>Cl<sub>2</sub>: MeOH) to provide 90 % yield of the desired product as a white solid. <sup>1</sup>H NMR(*d*-DMSO): δ=7.00 (d, *J*=8.0 Hz, 2 H; Phenyl), 6.49 (d, *J*=8.4 Hz, 2 H; Phenyl), 5.5 (br s, 1 H; NH), 4.77 (t, *J*=5.2 Hz, 1 H; OH), 4.29 (d, *J*=5.2 Hz, 2 H; -CH<sub>2</sub>-OH), 3.58 (s, 4 H; -O-CH<sub>2</sub>-), 3.03 (br s, 2 H; -NH-CH<sub>2</sub>-), 2.36 (s, 6 H; -N-CH<sub>2</sub>-), 1.66 ppm (t, *J*=6.8 Hz, 2 H; CH<sub>2</sub>); <sup>13</sup>C NMR(*d*-DMSO) : δ=148.5, 129.8, 128.4, 112.1 (Phenyl), 66.7 (-CH<sub>2</sub>-OH), 63.6 (-O-CH<sub>2</sub>-), 56.7 (-NH-CH<sub>2</sub>-), 53.9 (-N-CH<sub>2</sub>-), 41.8 (-N-CH<sub>2</sub>-), 26.1 ppm (CH<sub>2</sub>); MS (EI): *m/z*: 250 (35) [M<sup>+</sup>], 162 (25), 132 (45), 100 (99); HRMS (EI): calcd for C<sub>14</sub>H<sub>22</sub>O<sub>2</sub>N<sub>2</sub> : 250.1676 [M<sup>+</sup>]; found: 250.1674.

## Reference

1. K. Yoshikazu, M. Hiroshi, M. Denichi, EP277755.
2. M. Kawase, M. Teshima, S. Saito, S. Tani, *Heterocycles*, 1998, **48**, 2103.
3. H. Hamana, M. Yamazaki, *Chem. Pharm. Bull.* 1963, **11**, 415.
4. M. Andrei V., *Org. Lett.*, 2004, **6**, 2253.
5. (a) F. Savina, L. Fulvio, L. Antonio, M. Angelica, T. Vincenzo, A. Rosa, *Chirality*, 2000, **12**, 697; (b) Q. Jiang, D. Jiang, Y. Jiang, H. Fu, Y. Zhao, *Synlett*, 2007, 1836.
6. S. Röttger, P. J. R. Sjöberg and M. Larhed, *J. Comb. Chem.*, 2007, **9**, 204.

125307

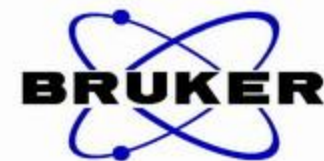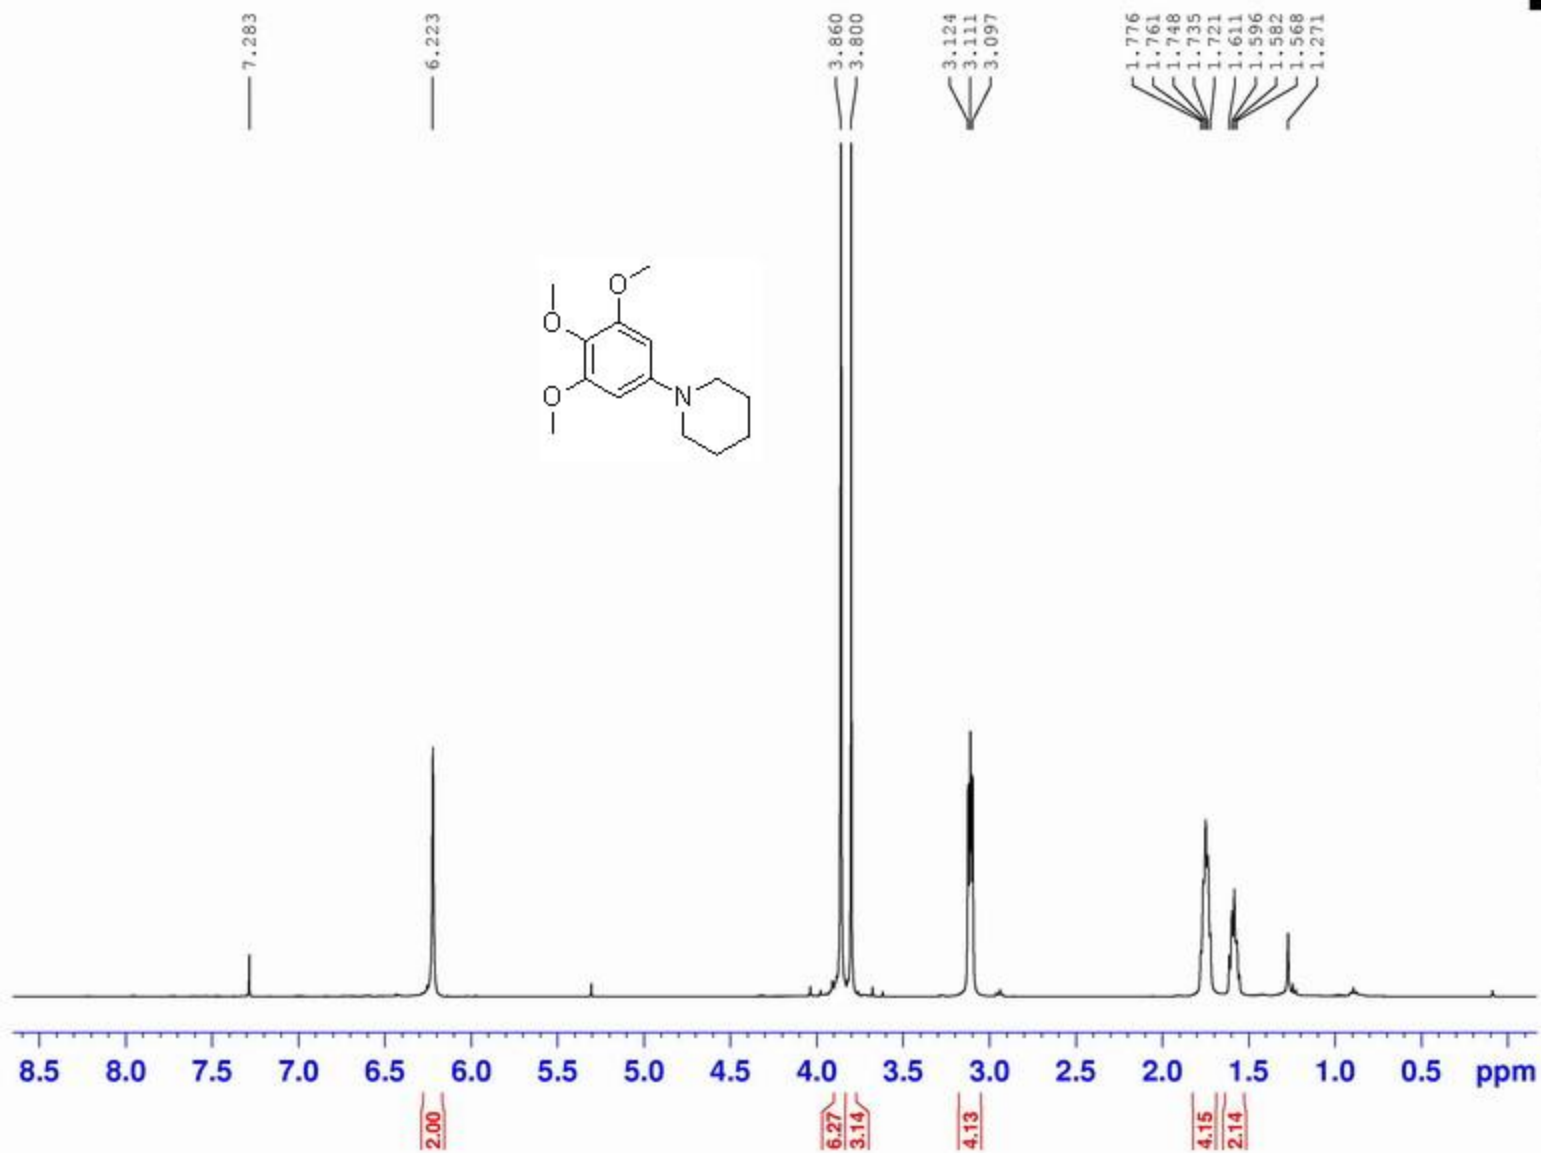

Current Data Parameters  
 NAME wdp  
 EXPNO 315  
 PROCNO 1

F2 - Acquisition Parameters  
 Date\_ 20080927  
 Time 21.22  
 INSTRUM spect  
 PROBHD 5 mm PABBO BB-  
 PULPROG zg30  
 TD 65536  
 SOLVENT CDCl3  
 NS 9  
 DS 2  
 SWH 8278.146 Hz  
 FIDRES 0.126314 Hz  
 AQ 3.9584243 sec  
 RG 71.8  
 DW 60.400 usec  
 DE 6.00 usec  
 TE 302.0 K  
 D1 1.00000000 sec  
 TDO 1

----- CHANNEL f1 -----  
 NUC1 1H  
 P1 13.60 usec  
 PL1 0.00 dB  
 SFO1 400.1324710 MHz

F2 - Processing parameters  
 SI 32768  
 SF 400.1300000 MHz  
 MDM EM  
 SSB 0  
 LB 0.30 Hz  
 GB 0  
 PC 1.00

125307

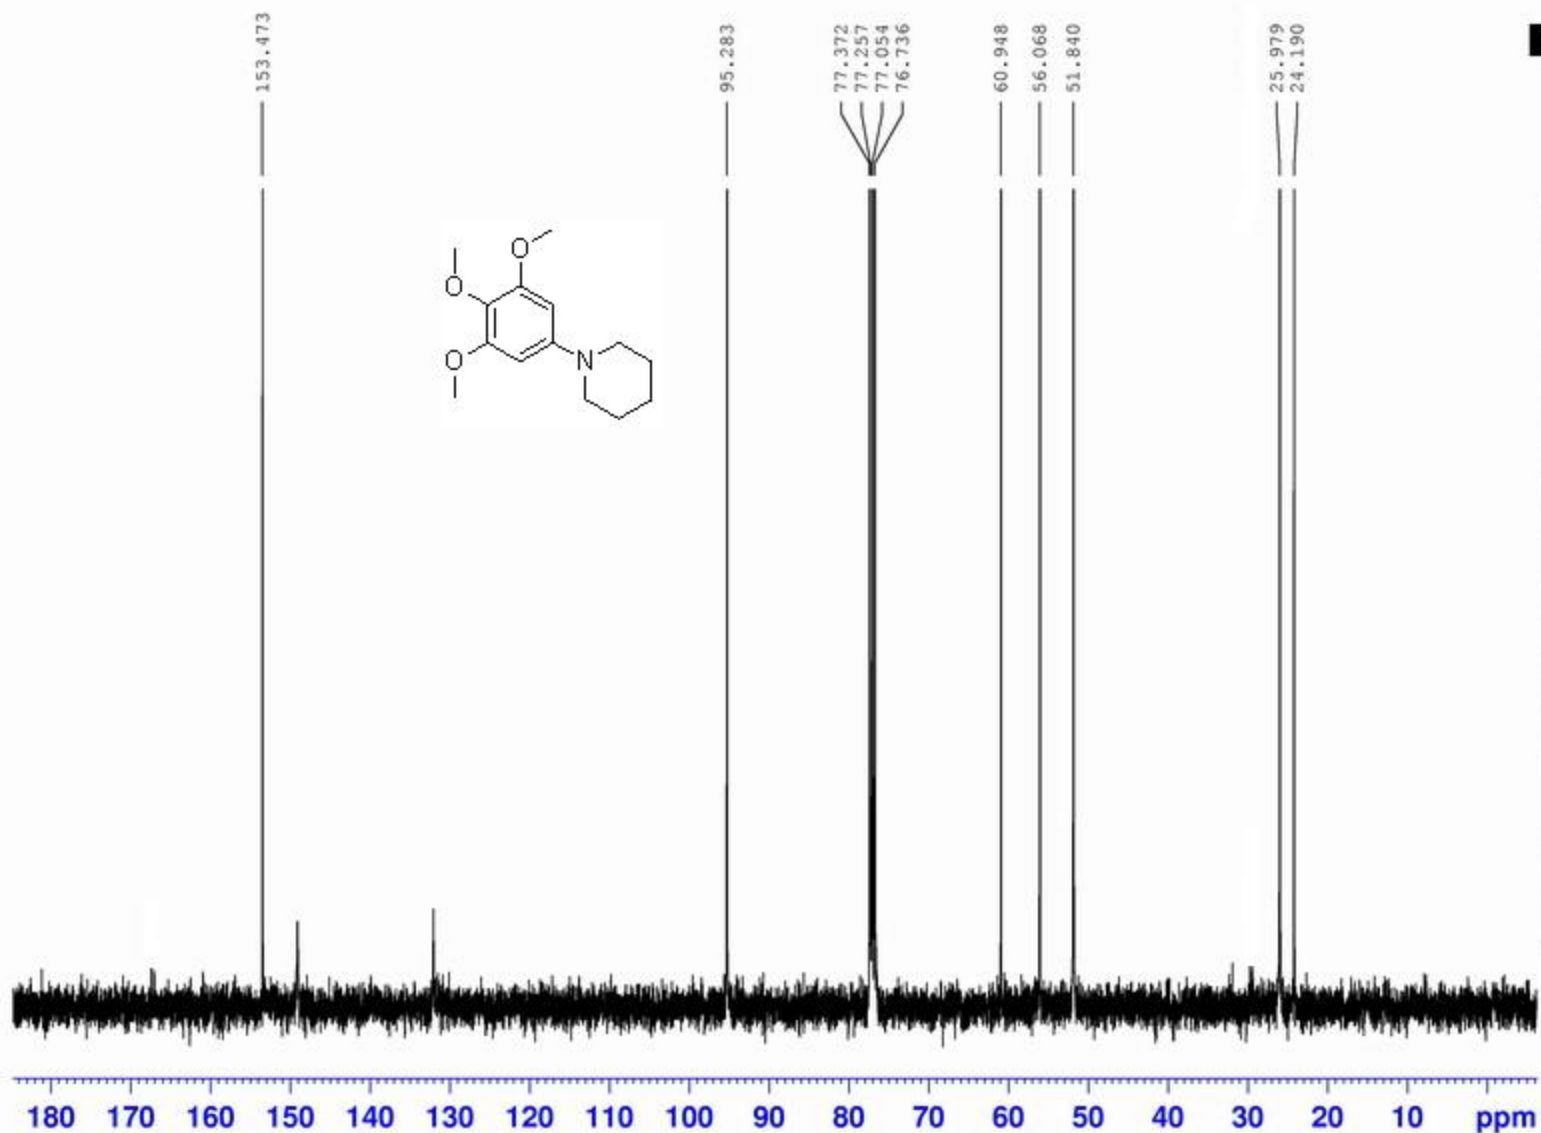

Current Data Parameters  
 NAME wdp  
 EXPNO 316  
 PROCNO 1

F2 - Acquisition Parameters  
 Date\_ 20080927  
 Time 21.31  
 INSTRUM spect  
 PROBHD 5 mm PABBO BB-  
 PULPROG zgpg30  
 TD 65536  
 SOLVENT CDCl3  
 NS 414  
 DS 4  
 SWH 23980.814 Hz  
 FIDRES 0.365918 Hz  
 AQ 1.3664756 sec  
 RG 1149.4  
 DW 20.850 usec  
 DE 6.00 usec  
 TE 302.2 K  
 D1 2.0000000 sec  
 d11 0.0300000 sec  
 DELTA 1.89999998 sec  
 TDO 1

----- CHANNEL f1 -----  
 NUC1 13C  
 P1 12.20 usec  
 PL1 1.00 dB  
 SFO1 100.6228298 MHz

----- CHANNEL f2 -----  
 CPDPRG2 waltz16  
 NUC2 1H  
 PCPD2 80.00 usec  
 PL2 0.00 dB  
 PL12 15.39 dB  
 PL13 15.50 dB  
 SFO2 400.1316005 MHz

F2 - Processing parameters  
 SI 32768  
 SF 100.6127690 MHz  
 WDW EM  
 SSB 0  
 LB 1.00 Hz  
 CB 0  
 PC 1.40

125308

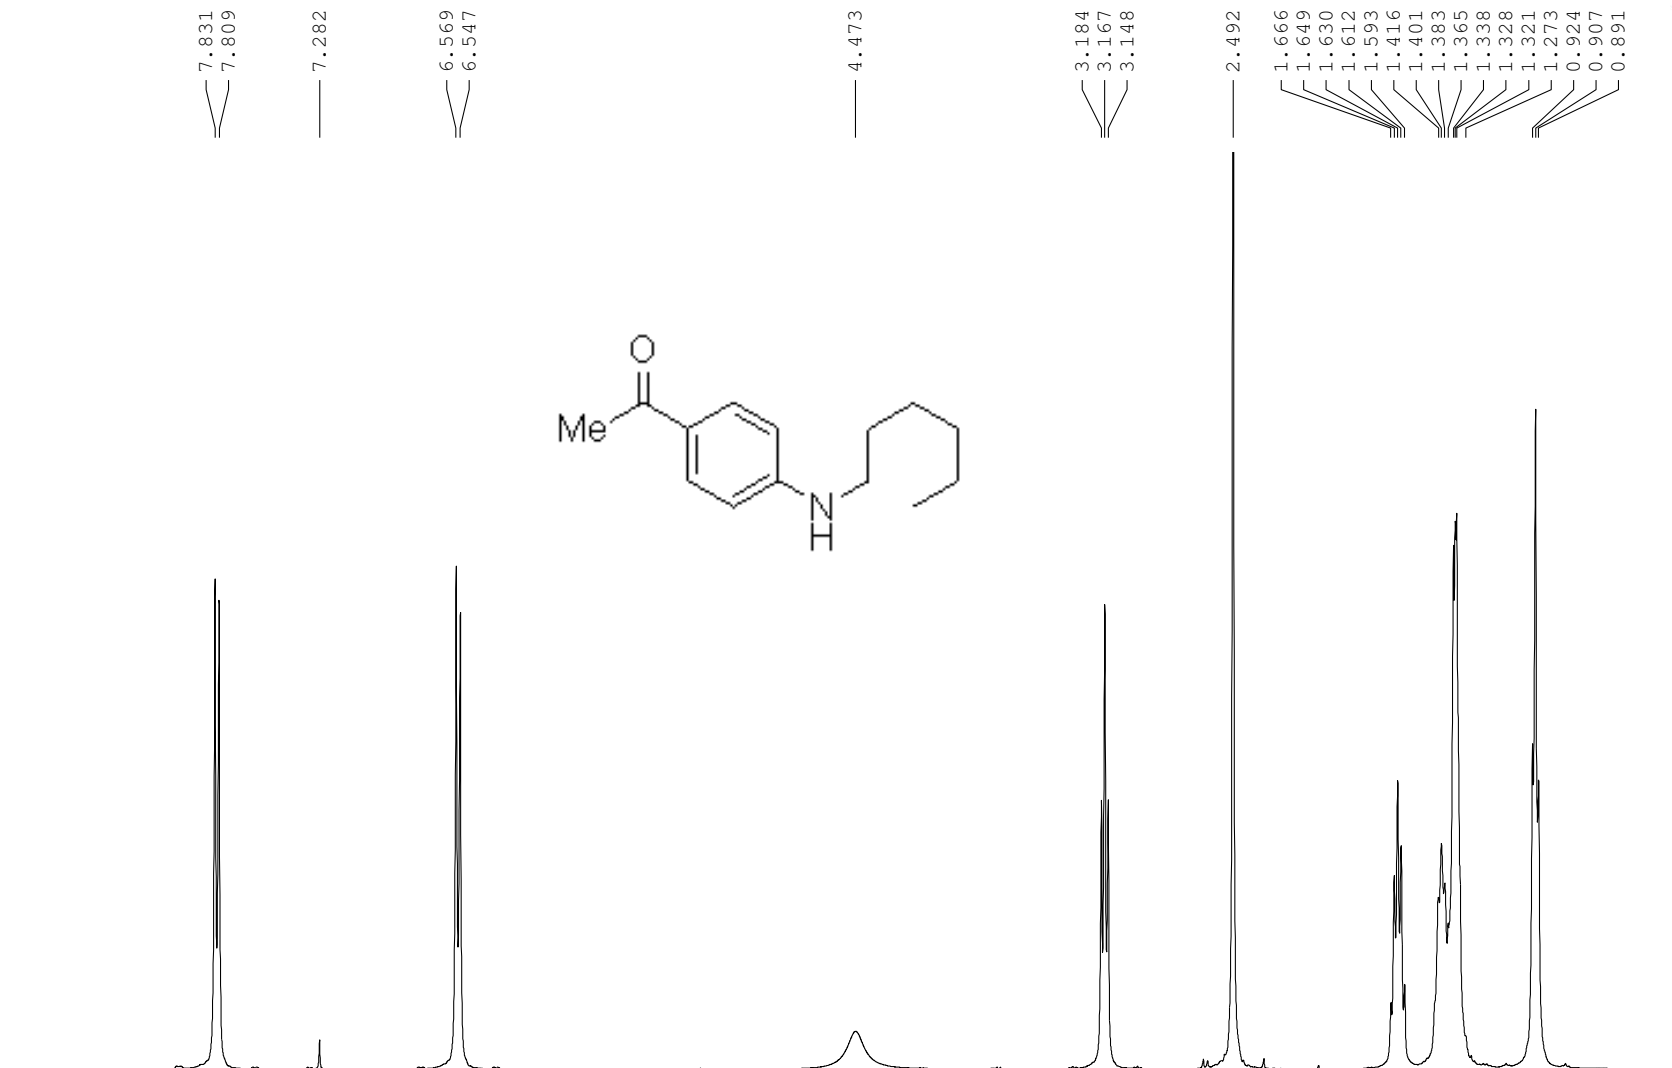

7.831  
7.809  
7.282  
6.569  
6.547  
4.473  
3.184  
3.167  
3.148  
2.492  
1.666  
1.649  
1.630  
1.612  
1.593  
1.416  
1.401  
1.383  
1.365  
1.338  
1.328  
1.321  
1.273  
0.924  
0.907  
0.891

Current Data Parameters  
NAME wdp  
EXPNO 317  
PROCNO 1

F2 - Acquisition Parameters  
Date\_ 20080927  
Time 22.00  
INSTRUM spect  
PROBHD 5 mm PABBO BB-  
PULPROG zg30  
TD 65536  
SOLVENT CDCl3  
NS 11  
DS 2  
SWH 8278.146 Hz  
FIDRES 0.126314 Hz  
AQ 3.9584243 sec  
RG 35.9  
DW 60.400 usec  
DE 6.00 usec  
TE 301.5 K  
D1 1.00000000 sec  
TD0 1

==== CHANNEL f1 =====  
NUC1 1H  
P1 13.60 usec  
PL1 0.00 dB  
SFO1 400.1324710 MHz

F2 - Processing parameters  
SI 32768  
SF 400.1300000 MHz  
WDW EM  
SSB 0  
LB 0.30 Hz  
GB 0  
PC 1.00

8.5 8.0 7.5 7.0 6.5 6.0 5.5 5.0 4.5 4.0 3.5 3.0 2.5 2.0 1.5 1.0 ppm

2.00  
2.02  
0.95  
2.04  
3.02  
2.06  
6.32  
3.11

125308

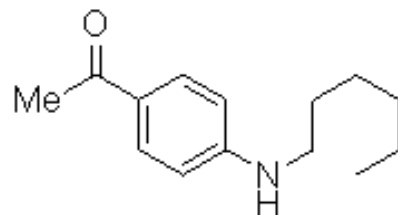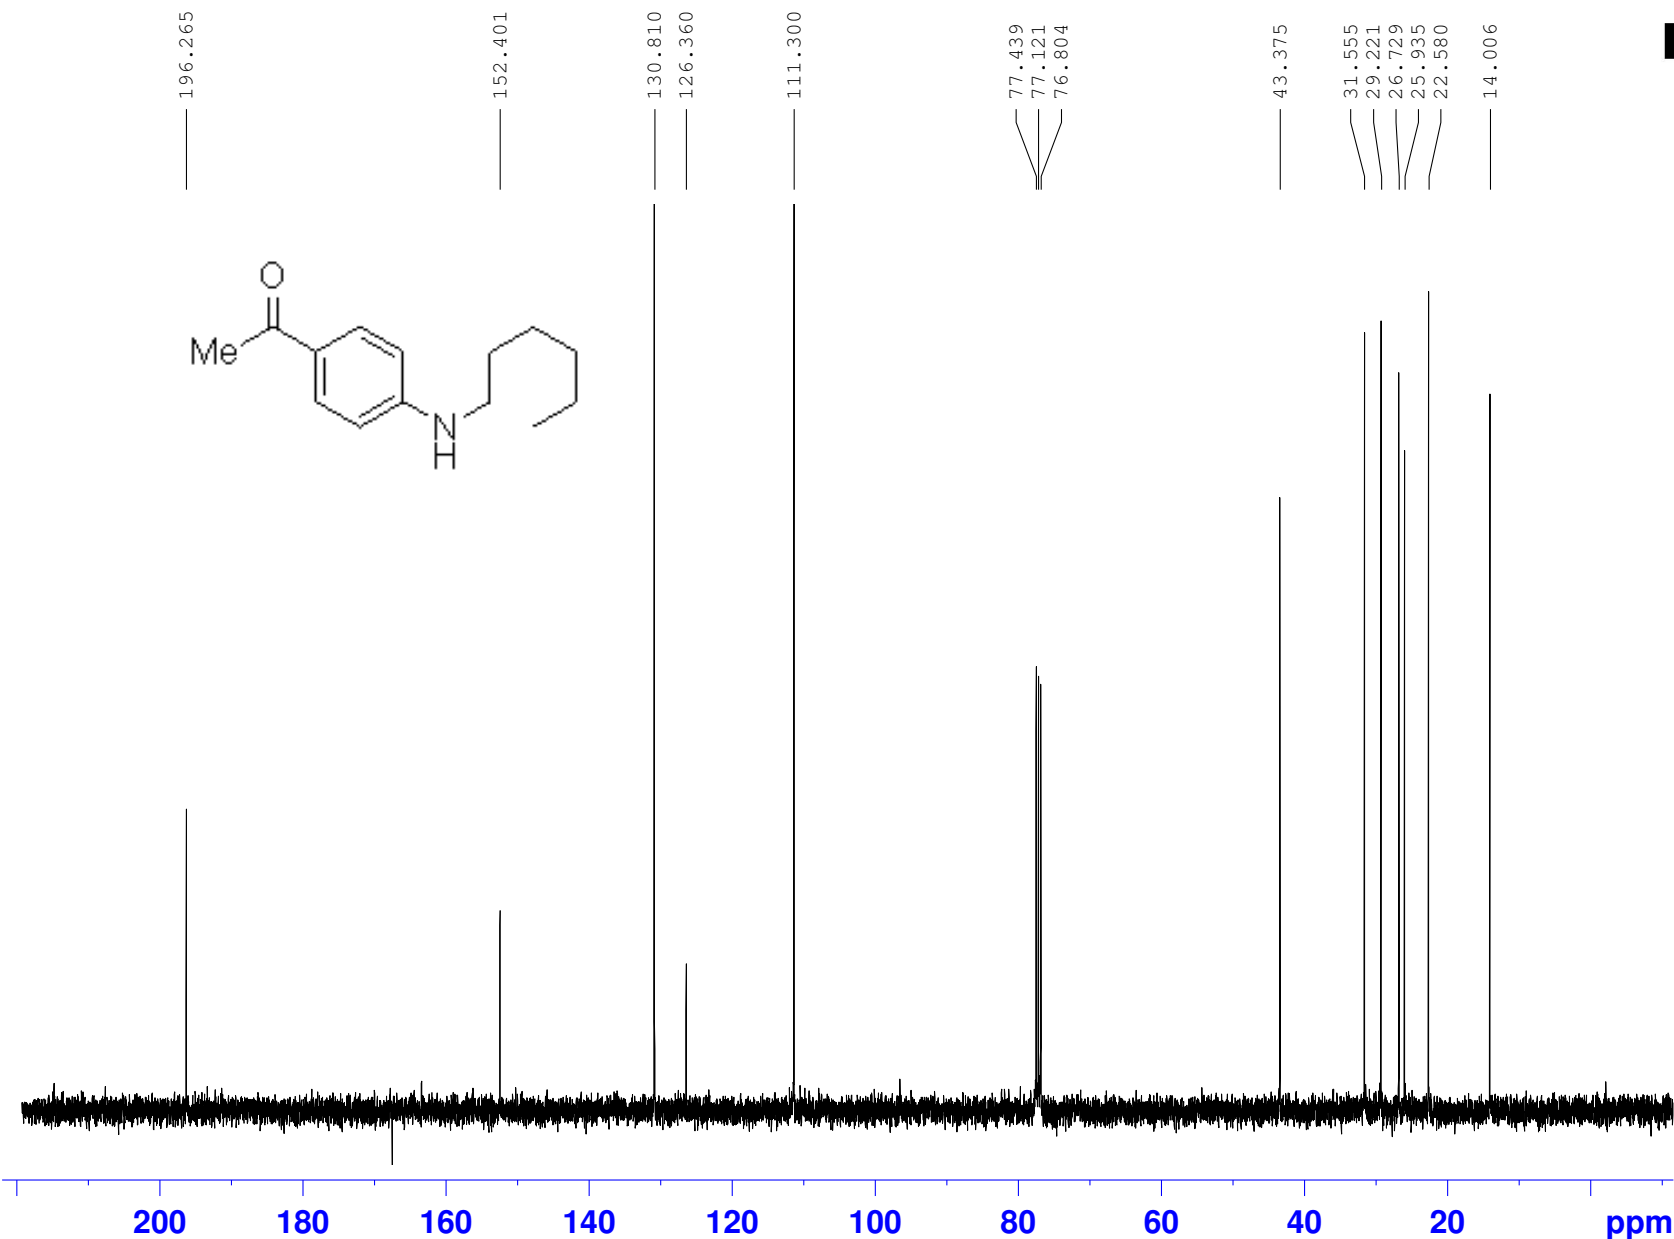

Current Data Parameters  
NAME wdp  
EXPNO 318  
PROCNO 1

F2 - Acquisition Parameters  
Date\_ 20080927  
Time\_ 22.06  
INSTRUM spect  
PROBHD 5 mm PABBO BB-  
PULPROG zgpg30  
TD 65536  
SOLVENT CDCl3  
NS 41  
DS 4  
SWH 23980.814 Hz  
FIDRES 0.365918 Hz  
AQ 1.3664756 sec  
RG 1149.4  
DW 20.850 usec  
DE 6.00 usec  
TE 301.5 K  
D1 2.00000000 sec  
d11 0.03000000 sec  
DELTA 1.89999998 sec  
TD0 1

==== CHANNEL f1 =====  
NUC1 13C  
P1 12.20 usec  
PL1 1.00 dB  
SFO1 100.6228298 MHz

==== CHANNEL f2 =====  
CPDPRG2 waltz16  
NUC2 1H  
PCPD2 80.00 usec  
PL2 0.00 dB  
PL12 15.39 dB  
PL13 15.50 dB  
SFO2 400.1316005 MHz

F2 - Processing parameters  
SI 32768  
SF 100.6127690 MHz  
WDW EM  
SSB 0  
LB 1.00 Hz  
GB 0  
PC 1.40

125311



7.329  
7.308  
7.283  
6.915  
6.894  
6.822  
6.799  
6.669  
6.646

4.239  
3.829  
3.773

1.270

0.114

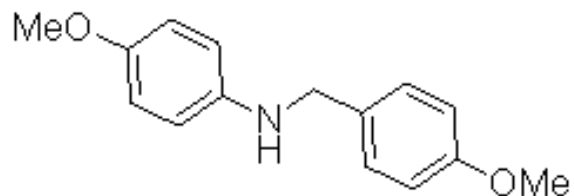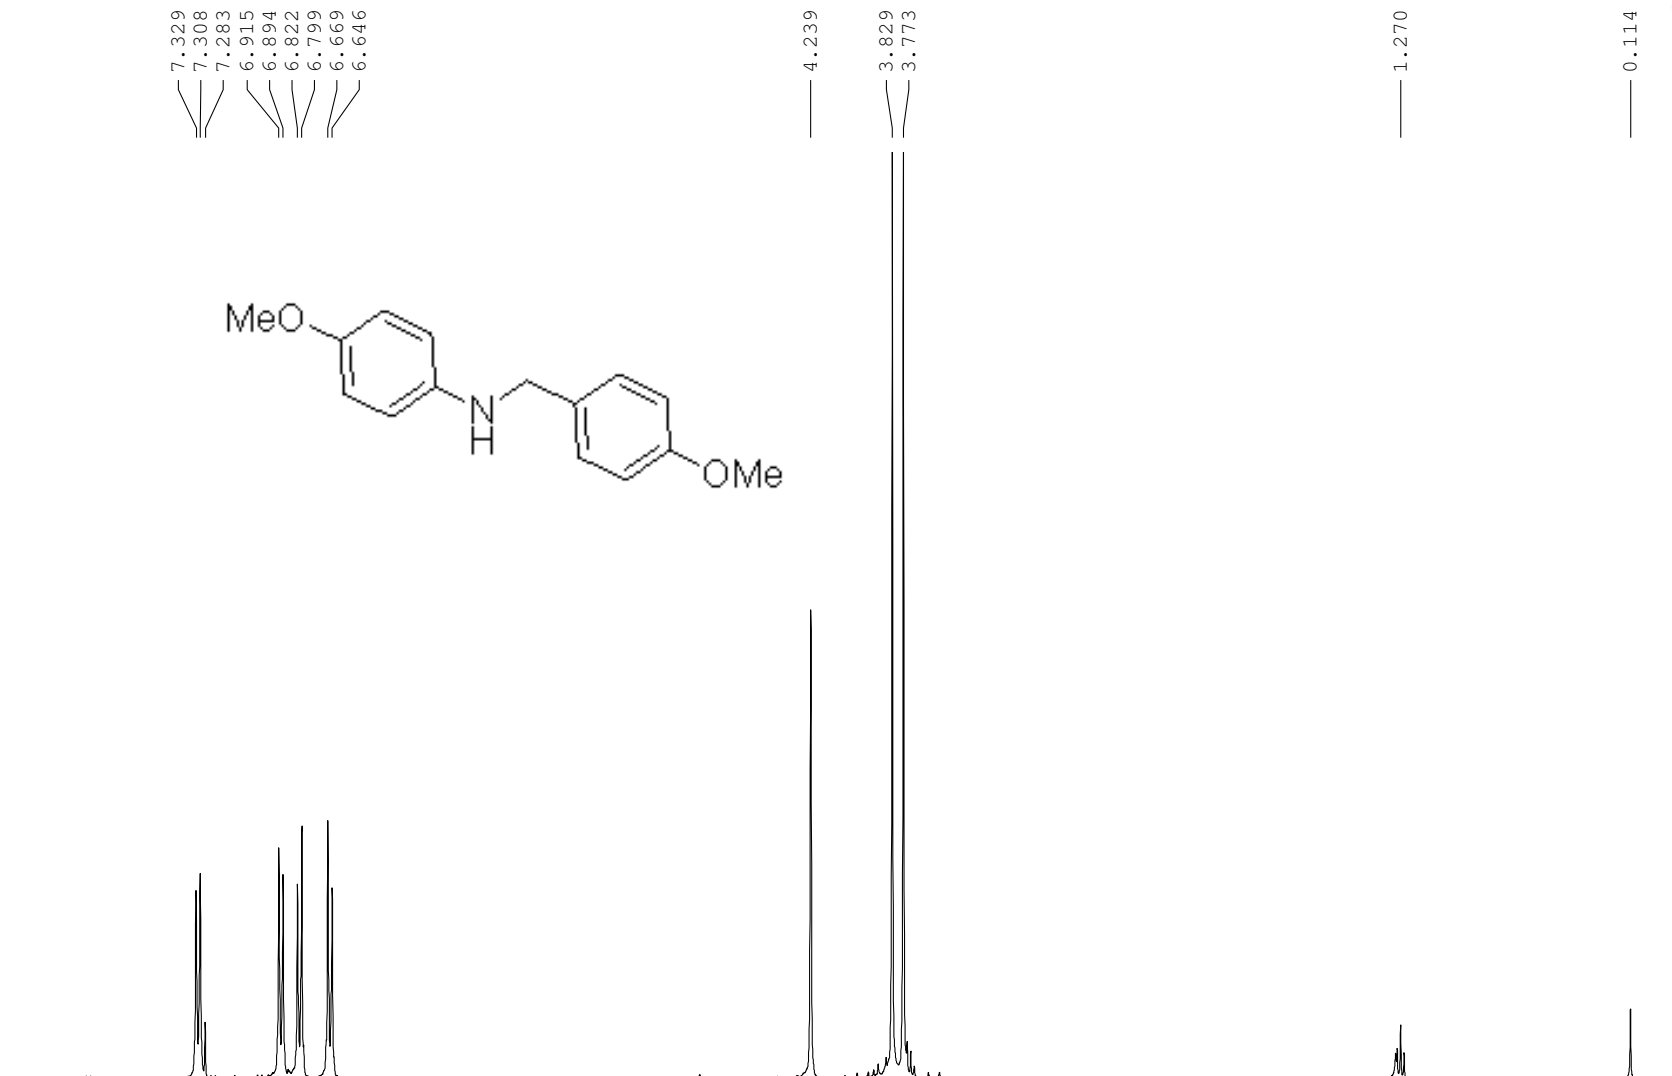

8.0 7.5 7.0 6.5 6.0 5.5 5.0 4.5 4.0 3.5 3.0 2.5 2.0 1.5 1.0 0.5 ppm

1.94  
1.99  
1.91  
1.98  
2.00  
3.11  
2.96

Current Data Parameters  
NAME wdp  
EXPNO 325  
PROCNO 1

F2 - Acquisition Parameters  
Date\_ 20080928  
Time 9.17  
INSTRUM spect  
PROBHD 5 mm PABBO BB-  
PULPROG zg30  
TD 65536  
SOLVENT CDCl3  
NS 6  
DS 2  
SWH 8278.146 Hz  
FIDRES 0.126314 Hz  
AQ 3.9584243 sec  
RG 128  
DW 60.400 usec  
DE 6.00 usec  
TE 300.1 K  
D1 1.00000000 sec  
TD0 1

==== CHANNEL f1 =====  
NUC1 1H  
P1 13.60 usec  
PL1 0.00 dB  
SFO1 400.1324710 MHz

F2 - Processing parameters  
SI 32768  
SF 400.1300000 MHz  
WDW EM  
SSB 0  
LB 0.30 Hz  
GB 0  
PC 1.00

125311

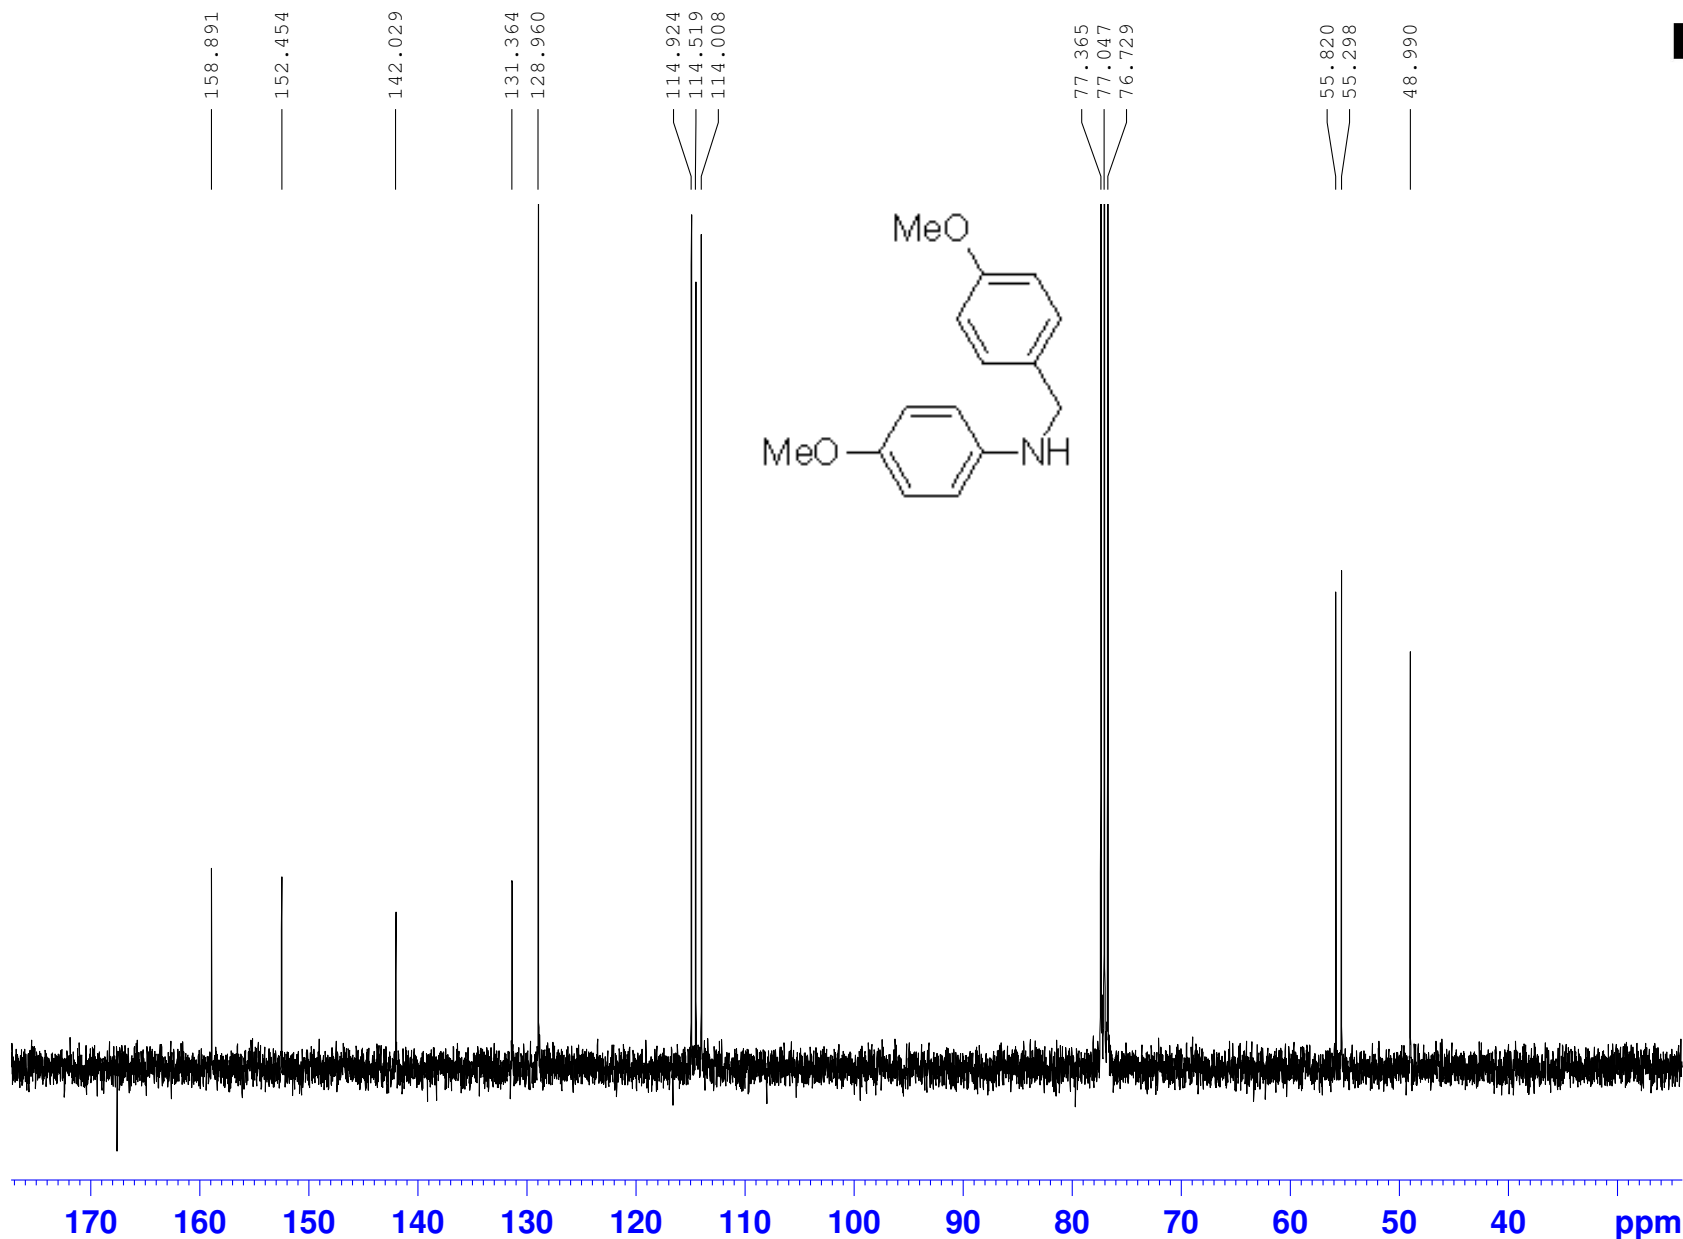

Current Data Parameters  
NAME wdp  
EXPNO 324  
PROCNO 1

F2 - Acquisition Parameters  
Date\_ 20080928  
Time 9.04  
INSTRUM spect  
PROBHD 5 mm PABBO BB-  
PULPROG zgpg30  
TD 65536  
SOLVENT CDCl3  
NS 103  
DS 4  
SWH 23980.814 Hz  
FIDRES 0.365918 Hz  
AQ 1.3664756 sec  
RG 912.3  
DW 20.850 usec  
DE 6.00 usec  
TE 300.2 K  
D1 2.00000000 sec  
d11 0.03000000 sec  
DELTA 1.89999998 sec  
TD0 1

==== CHANNEL f1 =====  
NUC1 13C  
P1 12.20 usec  
PL1 1.00 dB  
SFO1 100.6228298 MHz

==== CHANNEL f2 =====  
CPDPRG2 waltz16  
NUC2 1H  
PCPD2 80.00 usec  
PL2 0.00 dB  
PL12 15.39 dB  
PL13 15.50 dB  
SFO2 400.1316005 MHz

F2 - Processing parameters  
SI 32768  
SF 100.6127690 MHz  
WDW EM  
SSB 0  
LB 1.00 Hz  
GB 0  
PC 1.40

125312

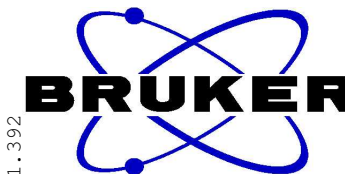

7.865  
7.850  
7.844  
7.836  
7.827  
7.516  
7.512  
7.499  
7.494  
7.492  
7.483  
7.475  
7.472  
7.467  
7.454  
7.450  
7.415  
7.396  
7.376  
7.283  
7.274  
7.254  
6.730  
6.711

3.567  
3.558  
3.547  
3.542  
3.533  
3.523  
3.517  
3.508  
3.499  
2.261  
2.254  
2.242  
2.230  
2.223  
1.906  
1.896  
1.886  
1.873  
1.863  
1.854  
1.781  
1.773  
1.764  
1.751  
1.741  
1.732  
1.556  
1.548  
1.540  
1.527  
1.519  
1.488  
1.465  
1.457  
1.450  
1.423  
1.416  
1.408  
1.399  
1.392

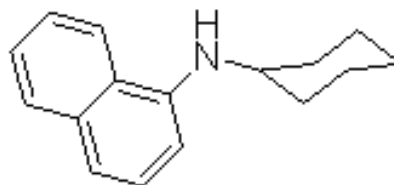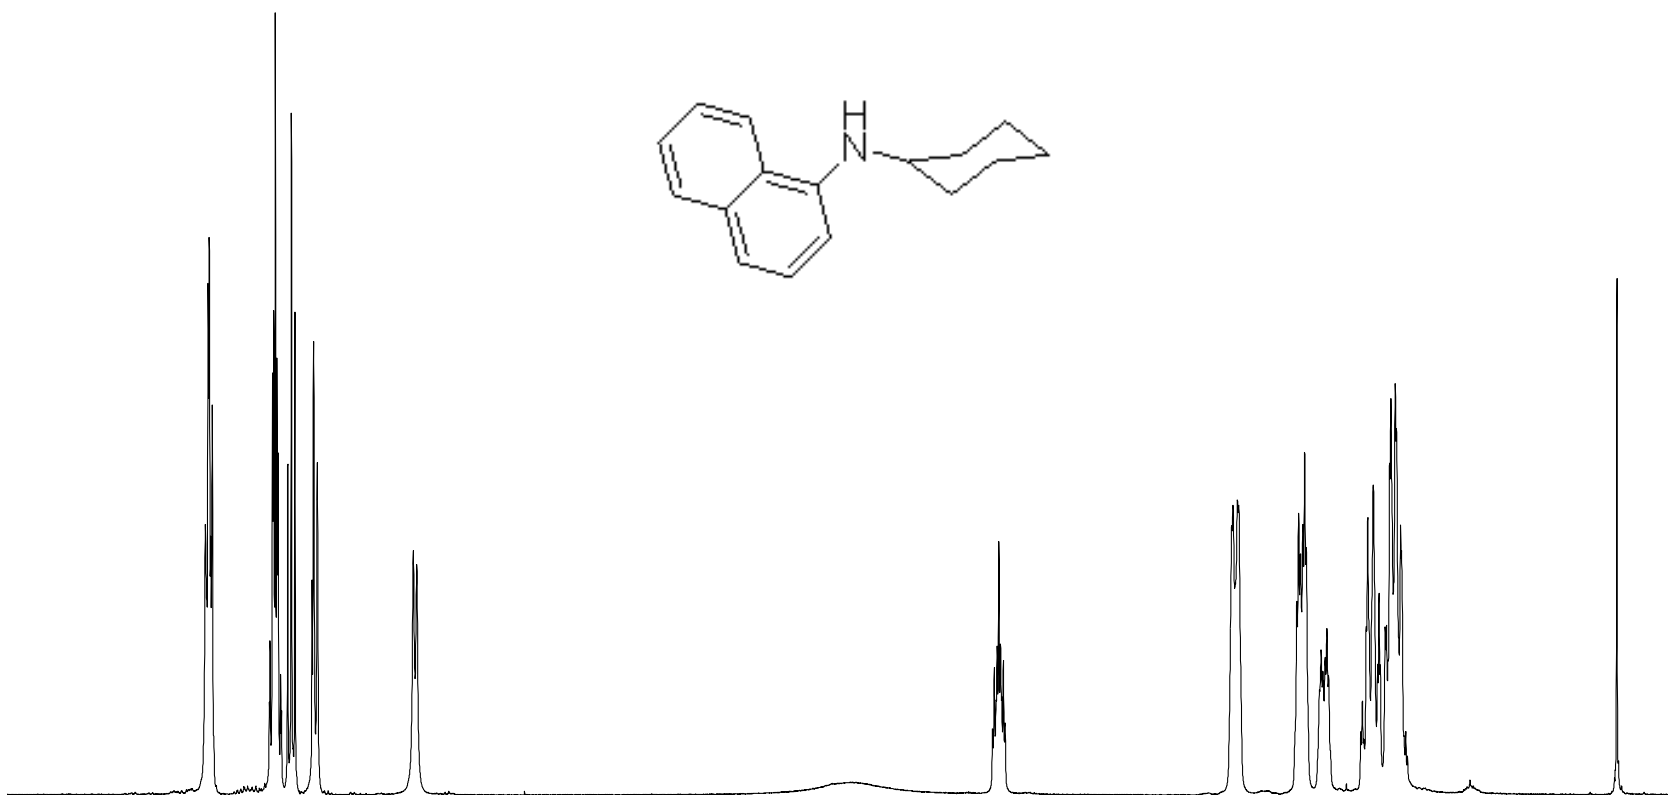

8.5 8.0 7.5 7.0 6.5 6.0 5.5 5.0 4.5 4.0 3.5 3.0 2.5 2.0 1.5 1.0 0.5 ppm

1.96  
1.94  
0.96  
0.89  
0.93  
0.77  
1.01  
2.00  
2.02  
1.05  
5.37

Current Data Parameters  
NAME wdp  
EXPNO 326  
PROCNO 1

F2 - Acquisition Parameters  
Date\_ 20081010  
Time\_ 18.29  
INSTRUM spect  
PROBHD 5 mm PABBO BB-  
PULPROG zg30  
TD 65536  
SOLVENT CDCl3  
NS 10  
DS 2  
SWH 8278.146 Hz  
FIDRES 0.126314 Hz  
AQ 3.9584243 sec  
RG 57  
DW 60.400 usec  
DE 8.00 usec  
TE 299.5 K  
D1 1.00000000 sec  
TD0 1

==== CHANNEL f1 =====  
NUC1 1H  
P1 13.60 usec  
PL1 0.00 dB  
SFO1 400.1324710 MHz

F2 - Processing parameters  
SI 32768  
SF 400.1300000 MHz  
WDW EM  
SSB 0  
LB 0.30 Hz  
GB 0  
PC 1.00



125312

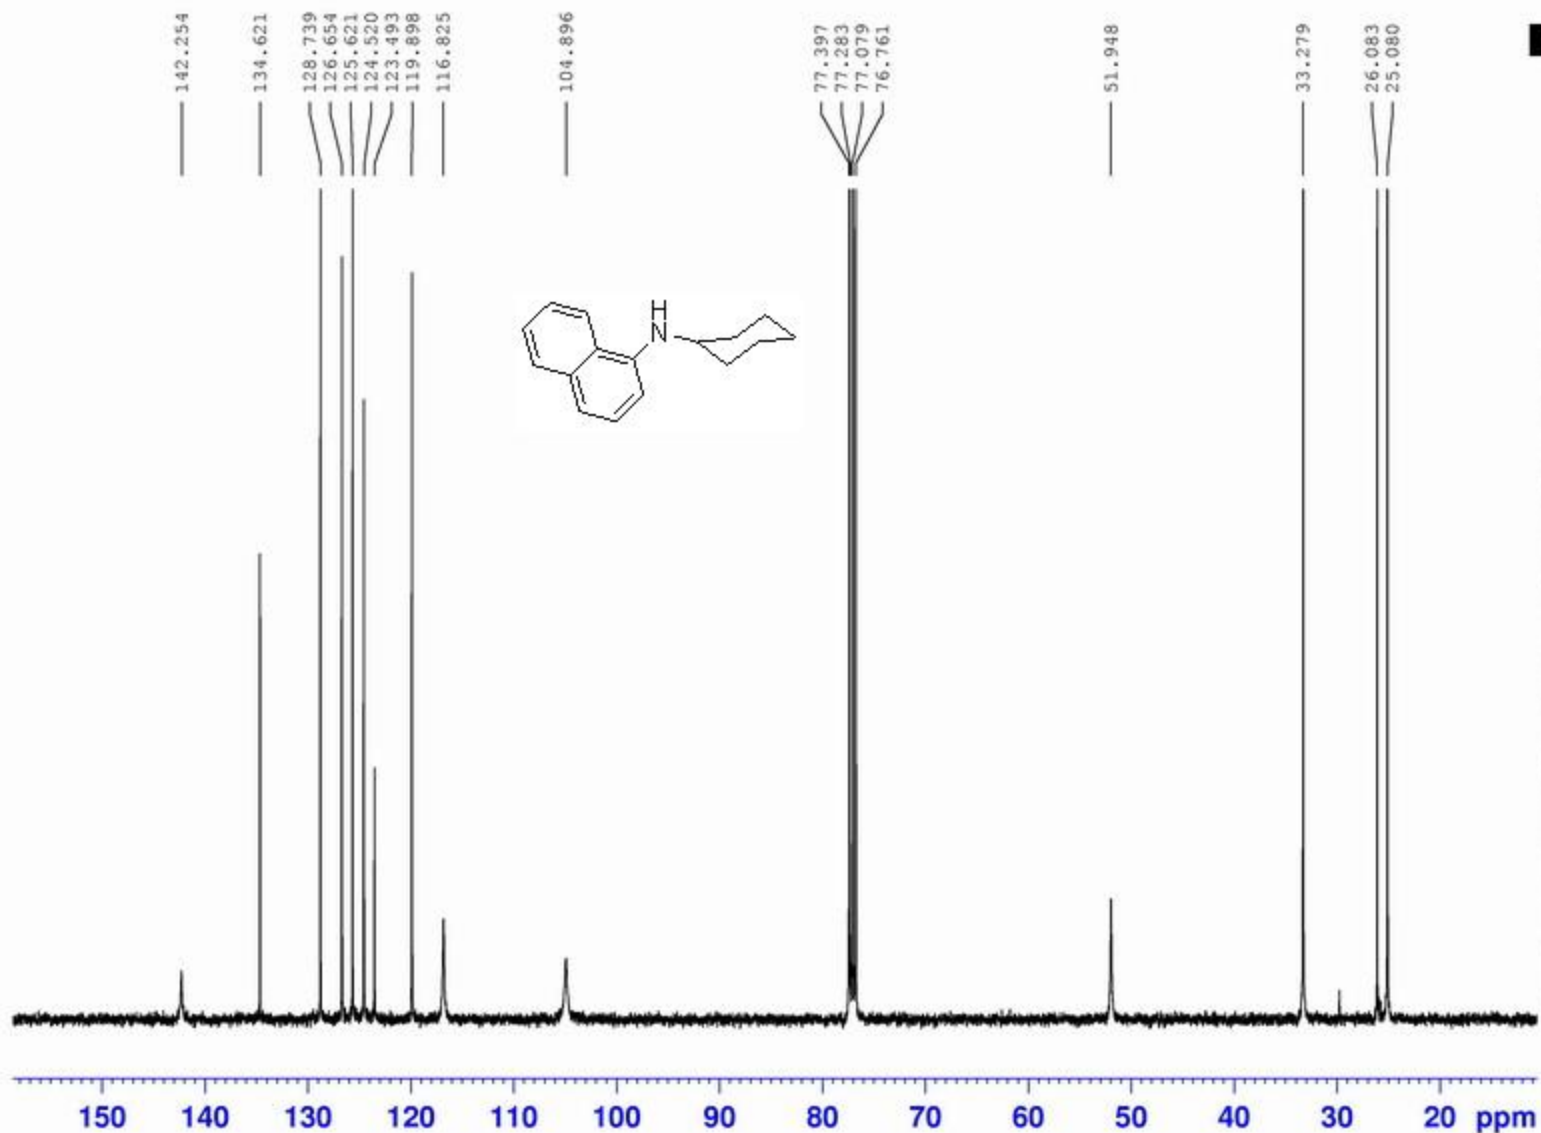

Current Data Parameters  
 NAME wdp  
 EXPNO 327  
 PROCNO 1

F2 - Acquisition Parameters  
 Date\_ 20081010  
 Time 18.36  
 INSTRUM spect  
 PROBHD 5 mm PABBO BB-  
 PULPROG zgpg30  
 TD 65536  
 SOLVENT CDCl3  
 NS 1228  
 DS 4  
 SWH 23980.814 Hz  
 FIDRES 0.365918 Hz  
 AQ 1.3664756 sec  
 RG 32768  
 DW 20.850 usec  
 DE 8.00 usec  
 TE 300.1 K  
 D1 2.00000000 sec  
 d11 0.03000000 sec  
 DELTA 1.89999999 sec  
 TDO 1

----- CHANNEL f1 -----  
 NUC1 13C  
 P1 12.20 usec  
 PL1 1.00 dB  
 SFO1 100.6228298 MHz

----- CHANNEL f2 -----  
 CPDPRG2 waltz16  
 NUC2 1H  
 PCPD2 80.00 usec  
 PL12 15.39 dB  
 PL13 15.50 dB  
 PL2 0.00 dB  
 SFO2 400.1316005 MHz

F2 - Processing parameters  
 SI 32768  
 SF 100.6127690 MHz  
 WDW EM  
 SSB 0  
 LB 1.00 Hz  
 GB 0  
 PC 1.40

125313

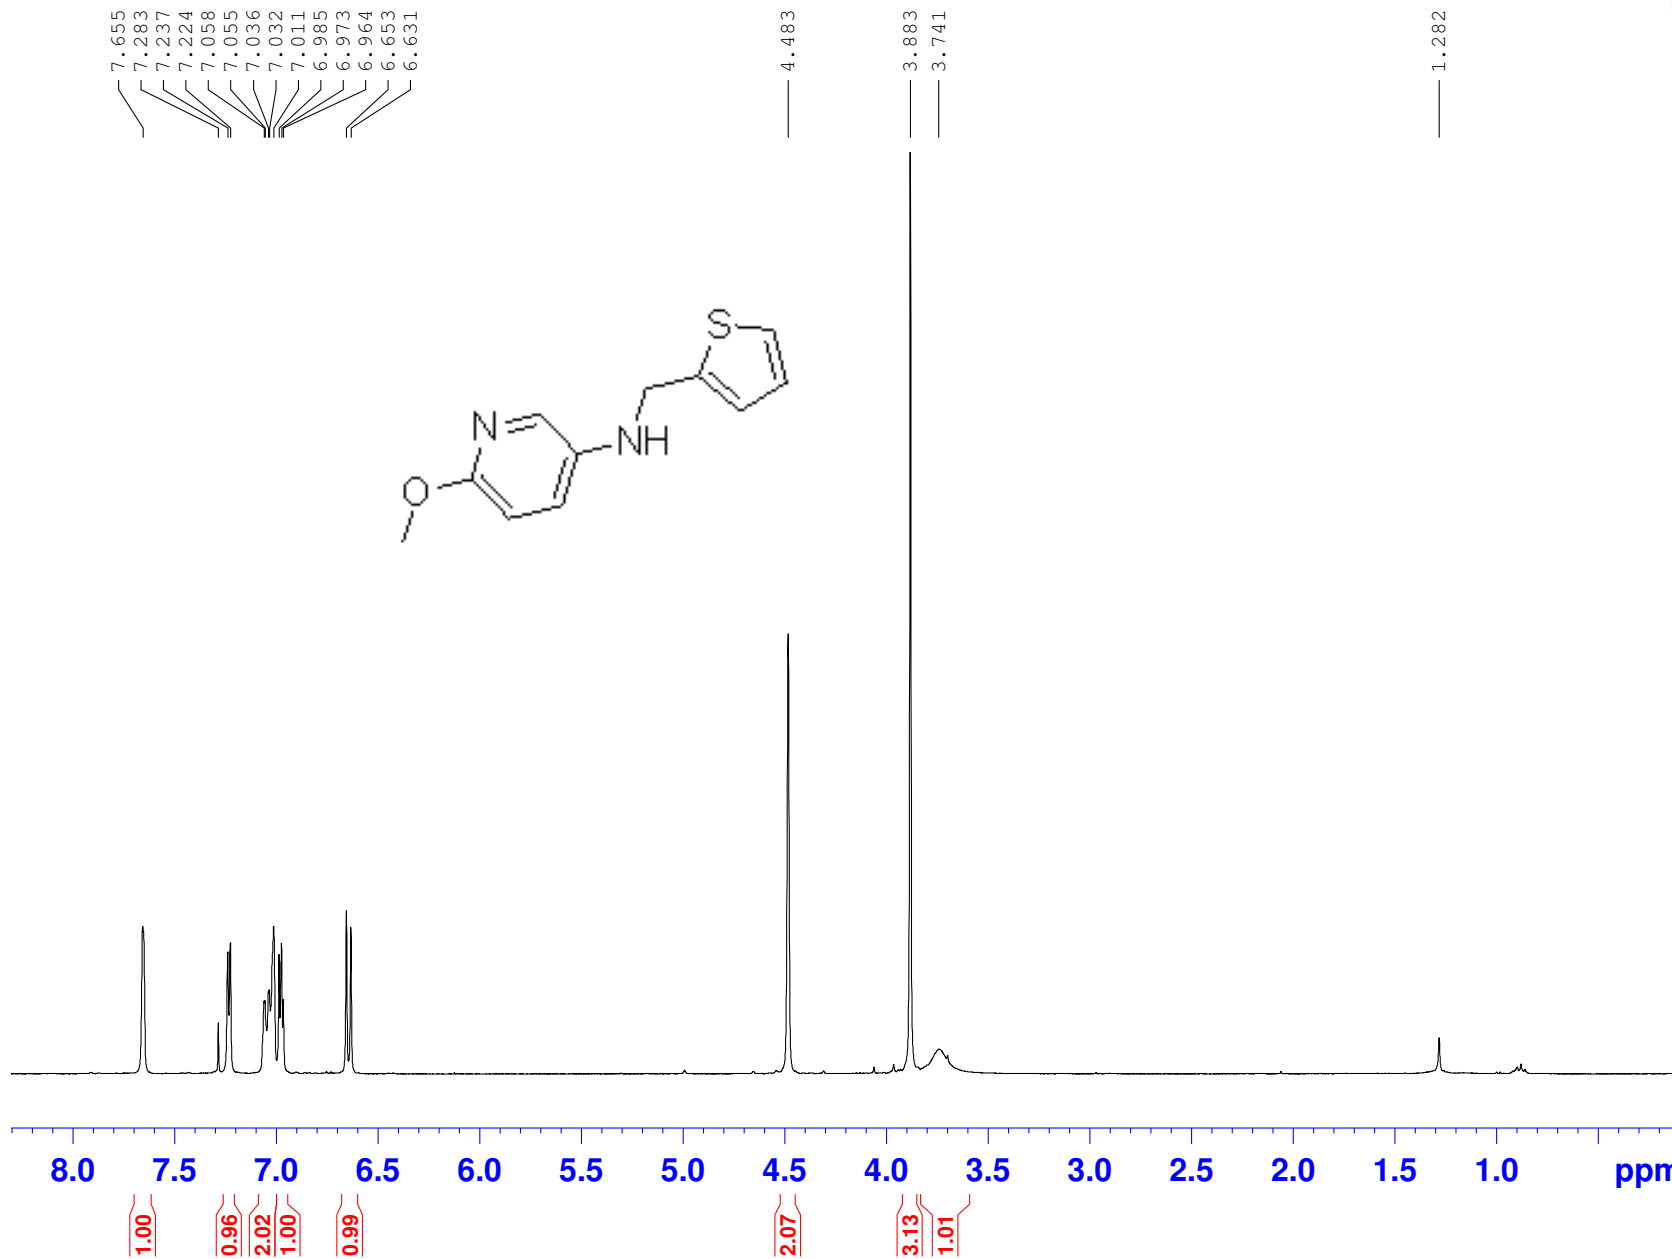

```
Current Data Parameters
NAME          wdp
EXPNO         331
PROCNO        1

F2 - Acquisition Parameters
Date_         20081010
Time          20.34
INSTRUM       spect
PROBHD        5 mm PABBO BB-
PULPROG       zg30
TD            65536
SOLVENT       CDCl3
NS            7
DS            2
SWH           8278.146 Hz
FIDRES        0.126314 Hz
AQ            3.9584243 sec
RG            90.5
DW            60.400 usec
DE            8.00 usec
TE            299.5 K
D1            1.00000000 sec
TD0           1

===== CHANNEL f1 =====
NUC1           1H
P1             13.60 usec
PL1            0.00 dB
SFO1           400.1324710 MHz

F2 - Processing parameters
SI             32768
SF            400.1300000 MHz
WDW            EM
SSB            0
LB             0.30 Hz
GB             0
PC             1.00
```

125313

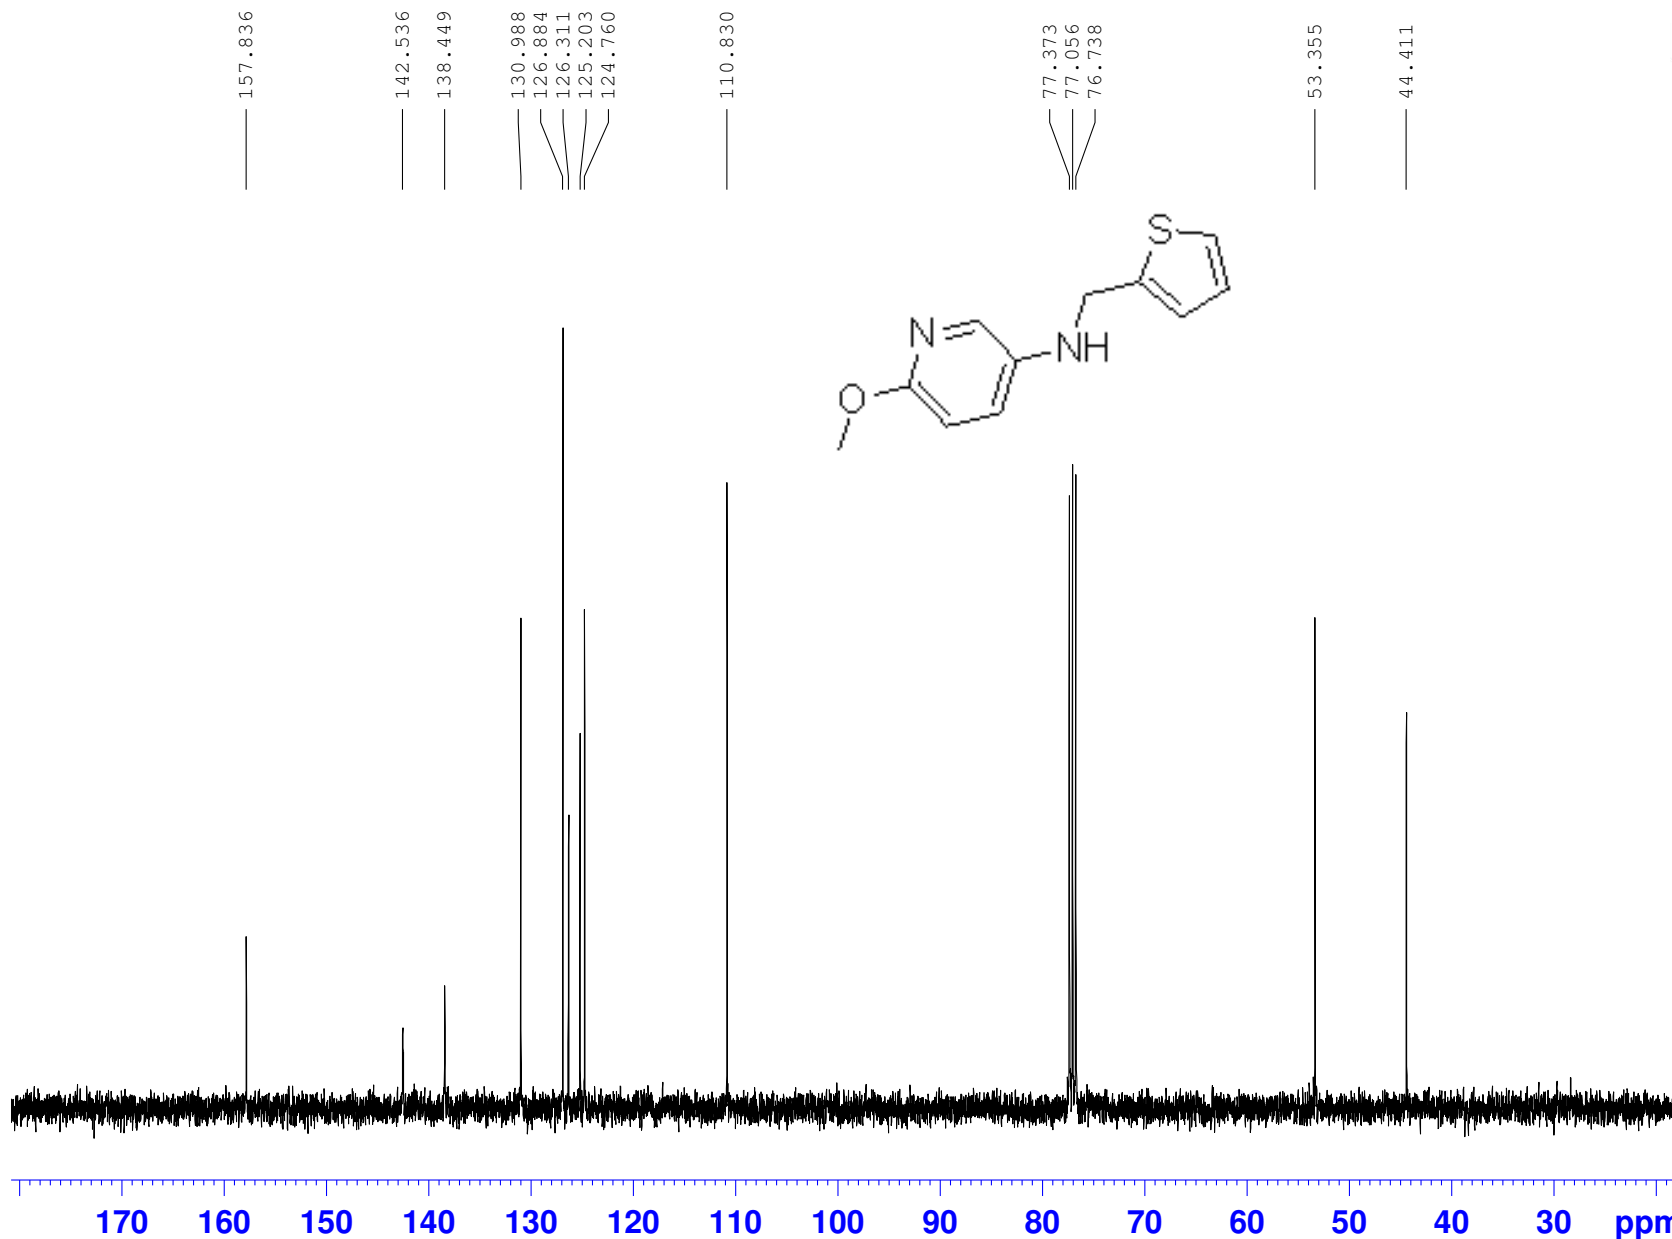

Current Data Parameters  
NAME wdp  
EXPNO 332  
PROCNO 1

F2 - Acquisition Parameters  
Date\_ 20081010  
Time 20.41  
INSTRUM spect  
PROBHD 5 mm PABBO BB-  
PULPROG zgpg30  
TD 65536  
SOLVENT CDCl3  
NS 108  
DS 4  
SWH 23980.814 Hz  
FIDRES 0.365918 Hz  
AQ 1.3664756 sec  
RG 32768  
DW 20.850 usec  
DE 8.00 usec  
TE 300.1 K  
D1 2.00000000 sec  
d11 0.03000000 sec  
DELTA 1.89999998 sec  
TD0 1

==== CHANNEL f1 =====  
NUC1 13C  
P1 12.20 usec  
PL1 1.00 dB  
SFO1 100.6228298 MHz

==== CHANNEL f2 =====  
CPDPRG2 waltz16  
NUC2 1H  
PCPD2 80.00 usec  
PL12 15.39 dB  
PL13 15.50 dB  
PL2 0.00 dB  
SFO2 400.1316005 MHz

F2 - Processing parameters  
SI 32768  
SF 100.6127690 MHz  
WDW EM  
SSB 0  
LB 1.00 Hz  
GB 0  
PC 1.40

12531

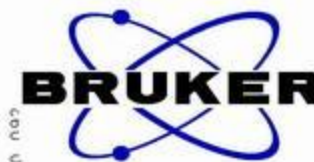

7.283  
7.148  
7.140  
7.135  
7.123  
7.118  
7.110  
6.574  
6.566  
6.561  
6.549  
6.544  
6.536

3.694  
3.678  
3.662  
3.129  
3.112  
3.094

1.703  
1.685  
1.666  
1.648  
1.630  
1.612  
1.596  
1.534  
1.531  
1.520  
1.512  
1.504  
1.495  
1.482  
1.477  
1.473

0.000

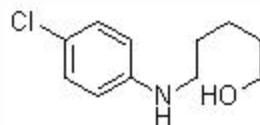

Current Data Parameters  
NAME wdp  
EXPNO 328  
PROCNO 1

F2 - Acquisition Parameters  
Date\_ 20081010  
Time 19.54  
INSTRUM spect  
PROBHD 5 mm PABBO BB-  
PULPROG zg30  
TD 65536  
SOLVENT CDCl3  
NS 11  
DS 2  
SWH 8278.146 Hz  
FIDRES 0.126314 Hz  
AQ 3.9584243 sec  
RG 90.5  
DW 60.400 usec  
DE 8.00 usec  
TE 299.6 K  
D1 1.00000000 sec  
TD0 1

----- CHANNEL f1 -----  
NUC1 1H  
P1 13.60 usec  
PL1 0.00 dB  
SFO1 400.1324710 MHz

F2 - Processing parameters  
SI 32768  
SF 400.1300000 MHz  
WDW EM  
SSB 0  
LB 0.30 Hz  
GB 0  
PC 1.00

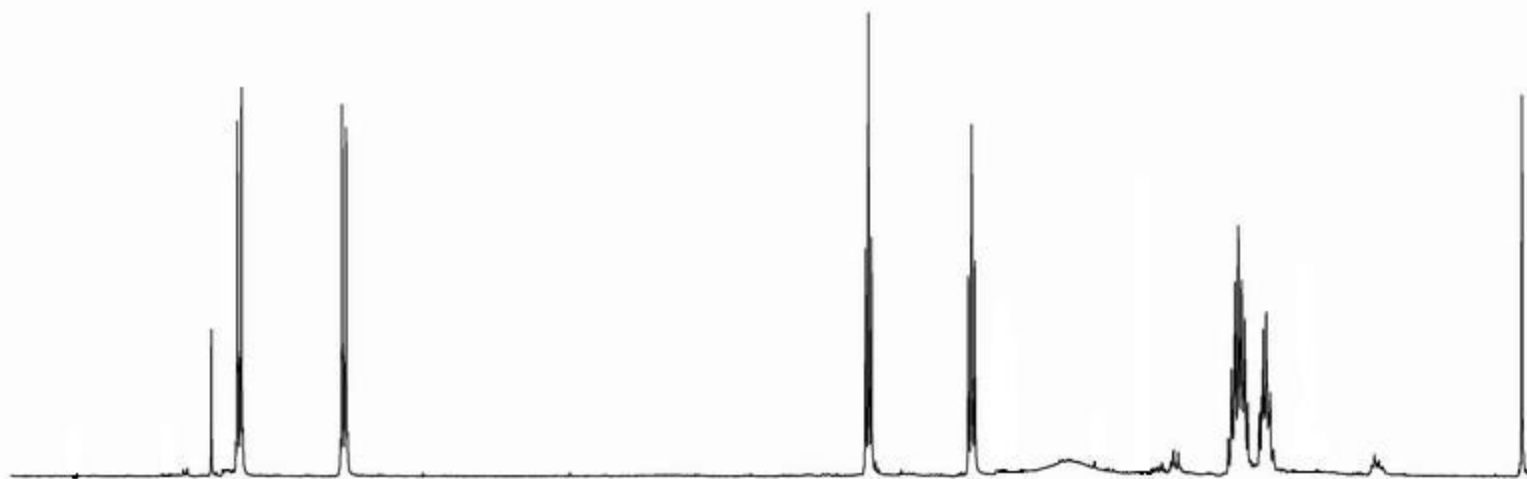

8.0 7.5 7.0 6.5 6.0 5.5 5.0 4.5 4.0 3.5 3.0 2.5 2.0 1.5 1.0 ppm

2.00

2.06

2.11

2.10

2.23

4.43

2.26

125315

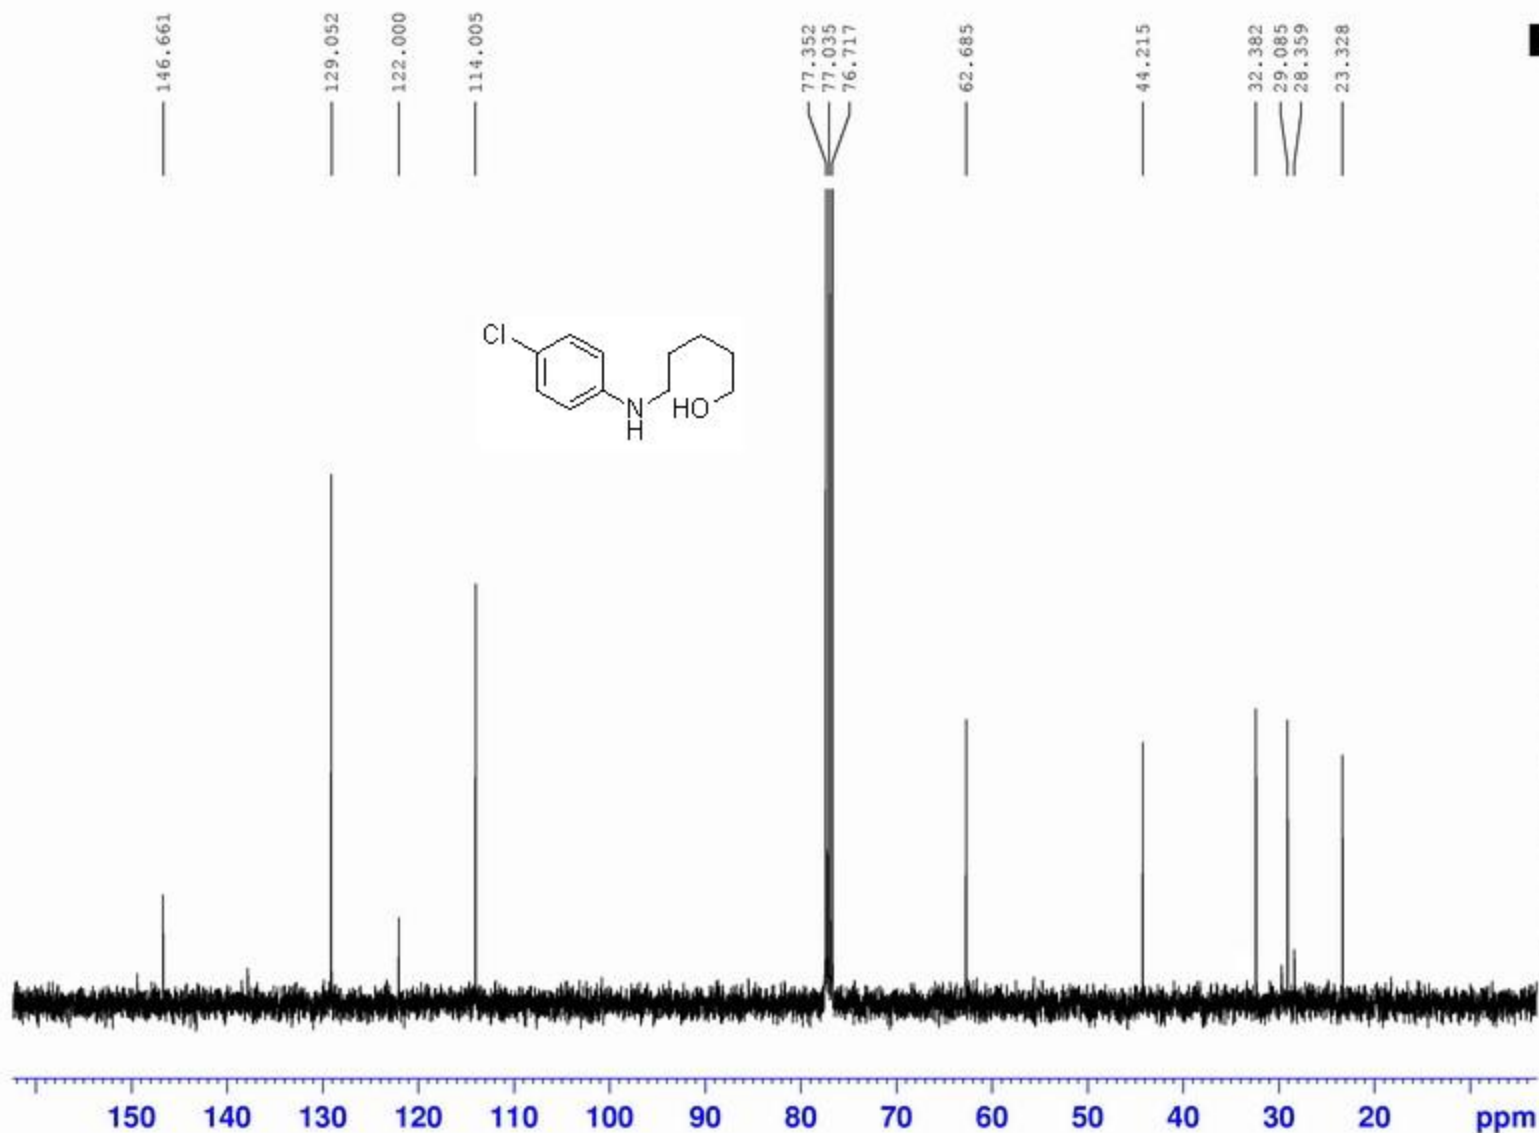

Current Data Parameters  
 NAME wdp  
 EXPNO 329  
 PROCNO 1

F2 - Acquisition Parameters  
 Date\_ 20081010  
 Time 20.07  
 INSTRUM spect  
 PROBHD 5 mm PABBO BB-  
 PULPROG zgpg30  
 TD 65536  
 SOLVENT CDCl3  
 NS 68  
 DS 4  
 SWH 23980.814 Hz  
 FIDRES 0.365918 Hz  
 AQ 1.3664756 sec  
 RG 32768  
 DW 20.850 usec  
 DE 8.00 usec  
 TE 300.0 K  
 D1 2.00000000 sec  
 d11 0.03000000 sec  
 DELTA 1.89999998 sec  
 TDO 1

----- CHANNEL f1 -----  
 NUC1 13C  
 P1 12.20 usec  
 PL1 1.00 dB  
 SFO1 100.6228298 MHz

----- CHANNEL f2 -----  
 CPDPRG2 waltz16  
 NUC2 1H  
 PCPD2 80.00 usec  
 PL12 15.39 dB  
 PL13 15.50 dB  
 PL2 0.00 dB  
 SFO2 400.1316005 MHz

F2 - Processing parameters  
 SI 32768  
 SF 100.6127690 MHz  
 WDW EM  
 SSB 0  
 LB 1.00 Hz  
 CB 0  
 PC 1.40

125316



7.026  
7.006  
6.518  
6.497  
5.470  
4.792  
4.778  
4.765  
4.311  
4.298  
3.580  
3.328  
3.028  
2.506  
2.358  
1.697  
1.680  
1.663

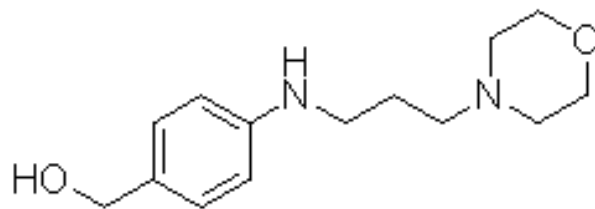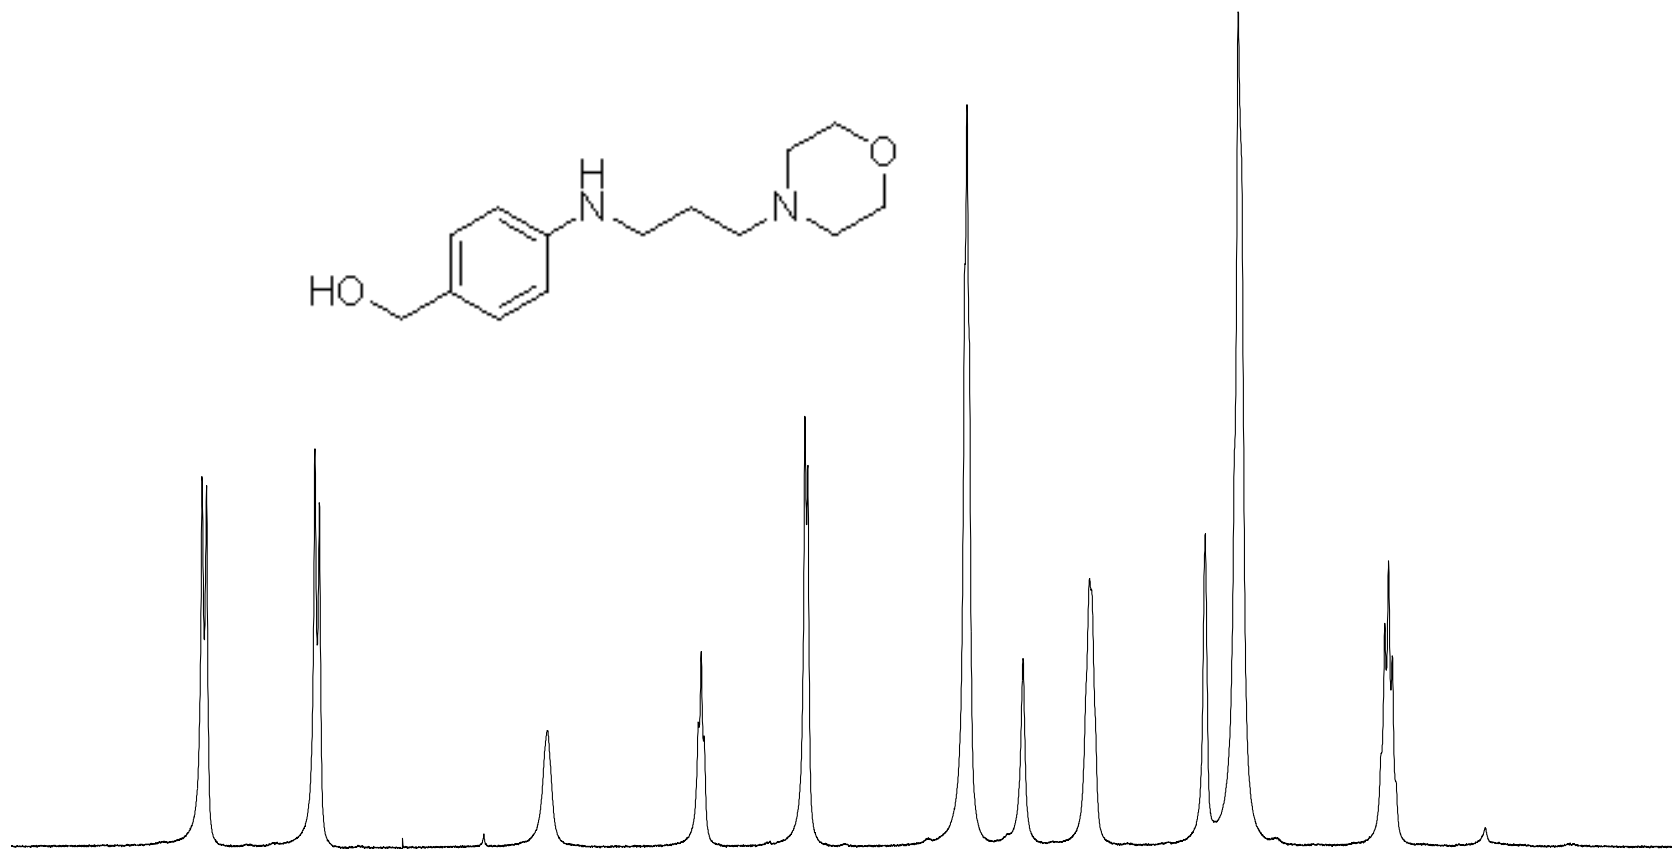

Current Data Parameters  
NAME wdp  
EXPNO 335  
PROCNO 1  
F2 - Acquisition Parameters  
Date\_ 20081010  
Time 21.21  
INSTRUM spect  
PROBHD 5 mm PABBO BB-  
PULPROG zg30  
TD 65536  
SOLVENT DMSO  
NS 8  
DS 2  
SWH 8278.146 Hz  
FIDRES 0.126314 Hz  
AQ 3.9584243 sec  
RG 90.5  
DW 60.400 usec  
DE 8.00 usec  
TE 299.5 K  
D1 1.00000000 sec  
TD0 1  
==== CHANNEL f1 =====  
NUC1 1H  
P1 13.60 usec  
PL1 0.00 dB  
SFO1 400.1324710 MHz  
F2 - Processing parameters  
SI 32768  
SF 400.1300000 MHz  
WDW EM  
SSB 0  
LB 0.30 Hz  
GB 0  
PC 1.00

7.5 7.0 6.5 6.0 5.5 5.0 4.5 4.0 3.5 3.0 2.5 2.0 1.5 1.0 ppm

2.00 2.00 0.95 1.00 2.00 4.08 2.03 6.02 2.00

125316

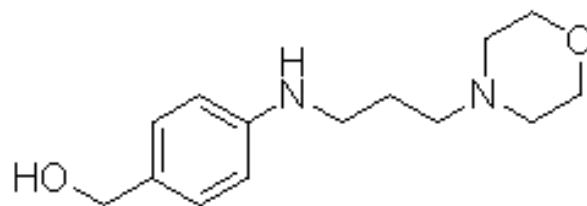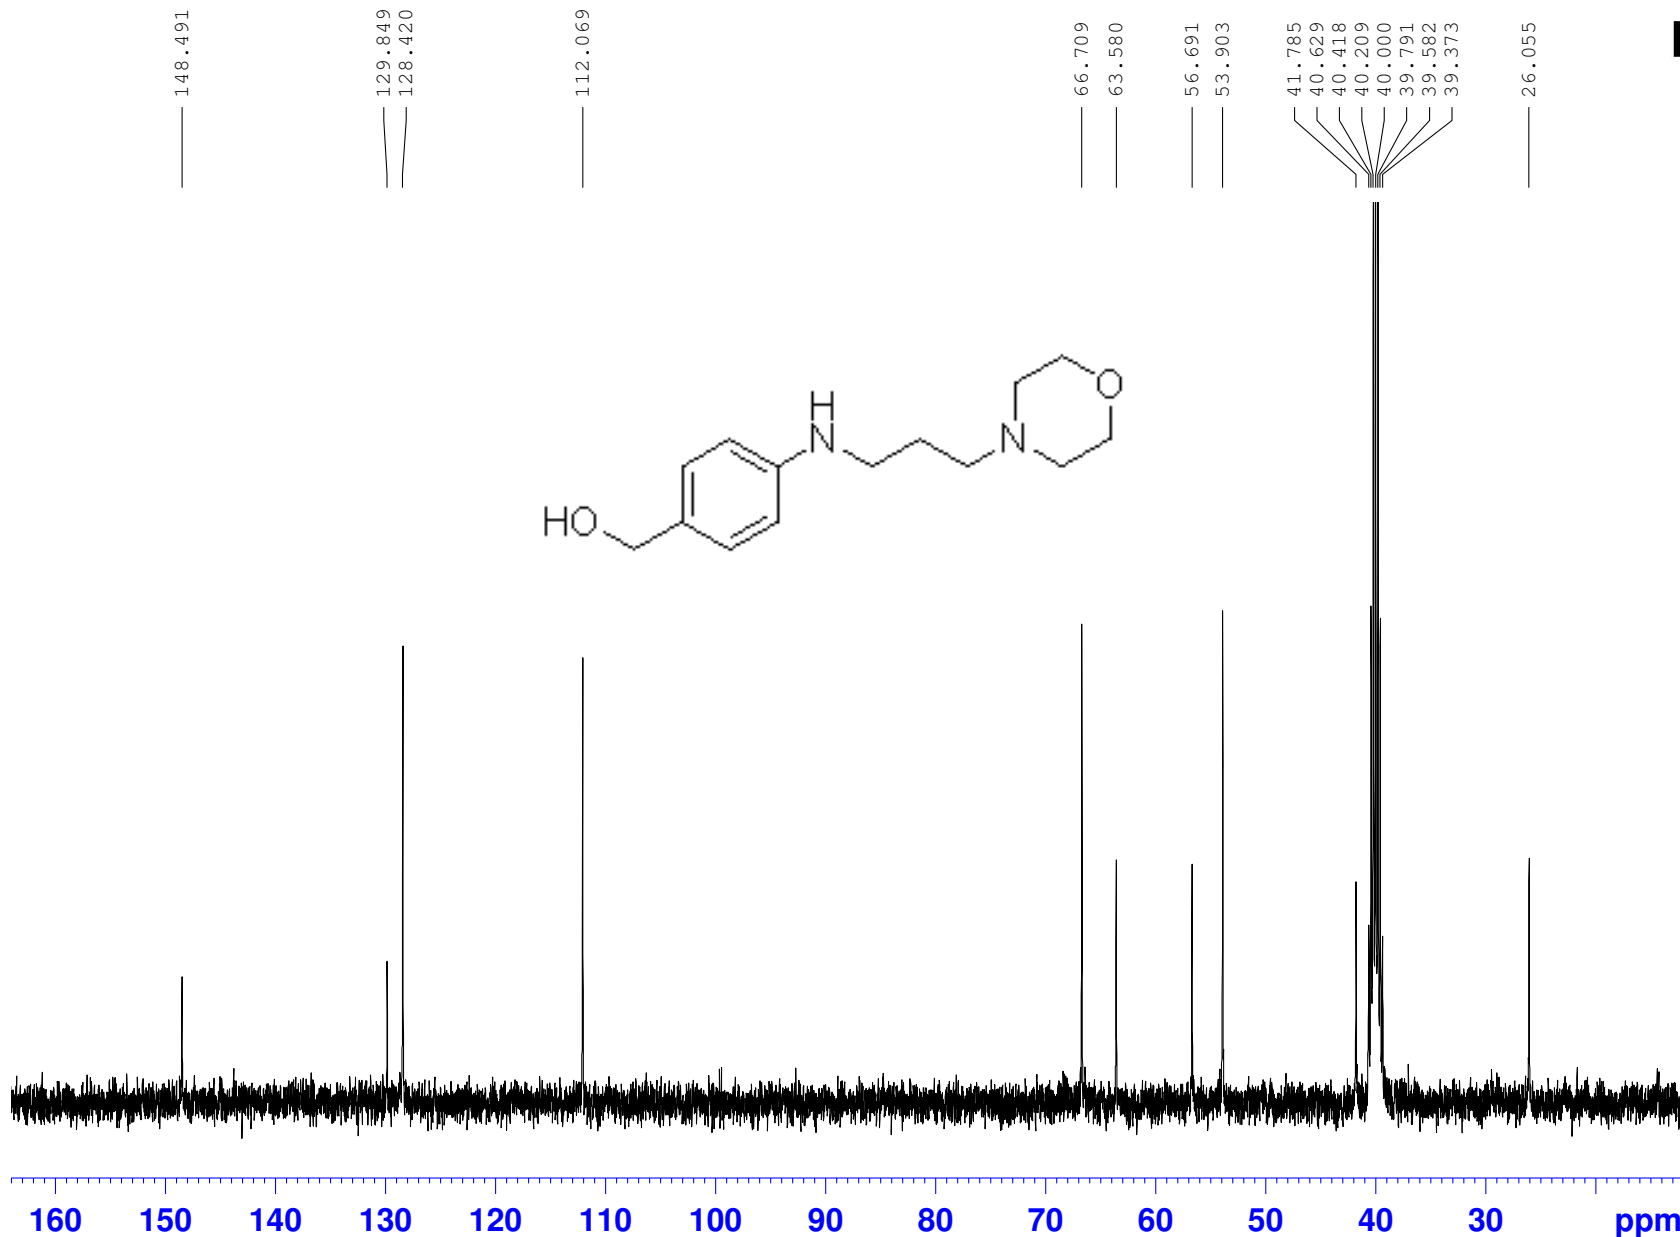

```
Current Data Parameters
NAME          wdp
EXPNO         334
PROCNO        1

F2 - Acquisition Parameters
Date_         20081010
Time          21.03
INSTRUM       spect
PROBHD        5 mm PABBO BB-
PULPROG       zgpg30
TD            65536
SOLVENT       DMSO
NS            40
DS            4
SWH           23980.814 Hz
FIDRES        0.365918 Hz
AQ            1.3664756 sec
RG            32768
DW            20.850 usec
DE            8.00 usec
TE            300.1 K
D1            2.00000000 sec
d11           0.03000000 sec
DELTA         1.89999998 sec
TD0           1

===== CHANNEL f1 =====
NUC1          13C
P1            12.20 usec
PL1           1.00 dB
SFO1          100.6228298 MHz

===== CHANNEL f2 =====
CPDPRG2       waltz16
NUC2          1H
PCPD2         80.00 usec
PL12          15.39 dB
PL13          15.50 dB
PL2           0.00 dB
SFO2          400.1316005 MHz

F2 - Processing parameters
SI            32768
SF            100.6127690 MHz
WDW           EM
SSB           0
LB            1.00 Hz
GB            0
PC            1.40
```

125323

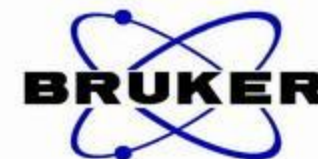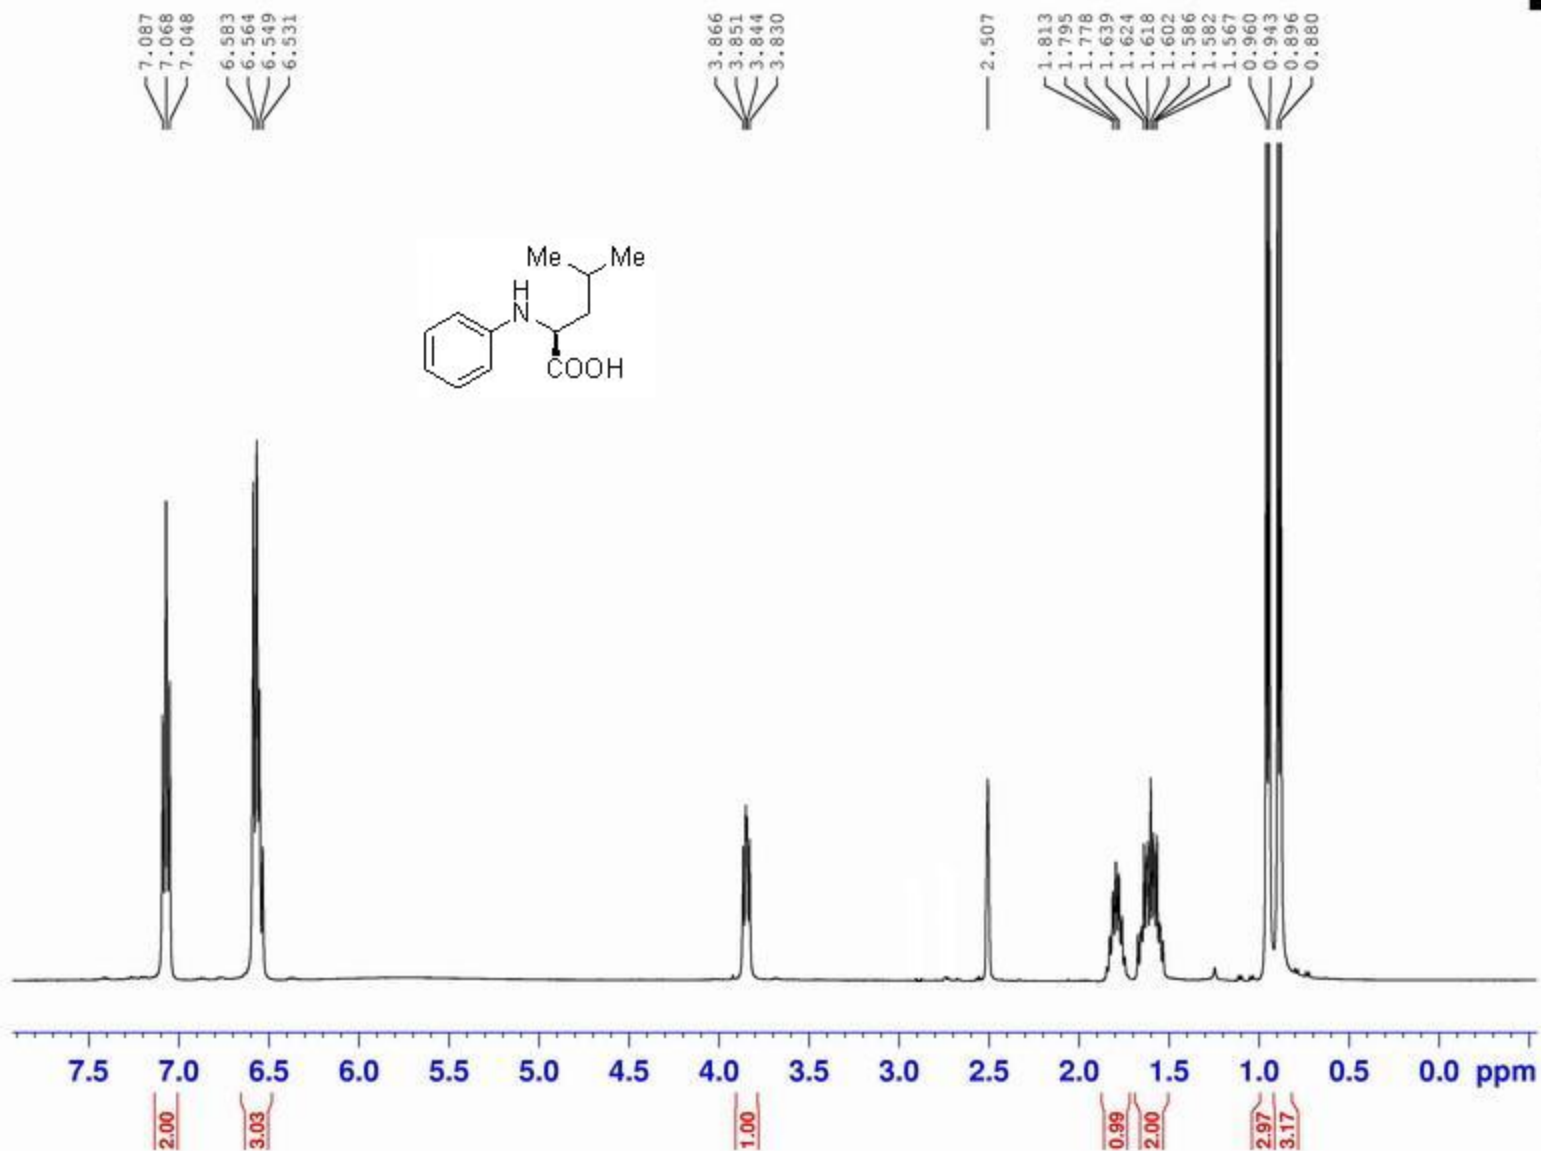

Current Data Parameters  
 NAME wdp  
 EXPNO 340  
 PROCNO 1

F2 - Acquisition Parameters  
 Date\_ 20081012  
 Time 12.43  
 INSTRUM spect  
 PROBHD 5 mm PABBO BB-  
 PULPROG zg30  
 TD 65536  
 SOLVENT DMSO  
 NS 16  
 DS 2  
 SWH 8278.146 Hz  
 FIDRES 0.126314 Hz  
 AQ 3.9584243 sec  
 RG 71.8  
 DW 60.400 usec  
 DE 8.00 usec  
 TE 300.8 K  
 D1 1.00000000 sec  
 TD0 1

----- CHANNEL f1 -----  
 NUC1 1H  
 P1 13.60 usec  
 PL1 0.00 dB  
 SFO1 400.1324710 MHz

F2 - Processing parameters  
 SI 32768  
 SF 400.1300000 MHz  
 WDW EM  
 SSB 0  
 LB 0.30 Hz  
 GB 0  
 PC 1.00



125323

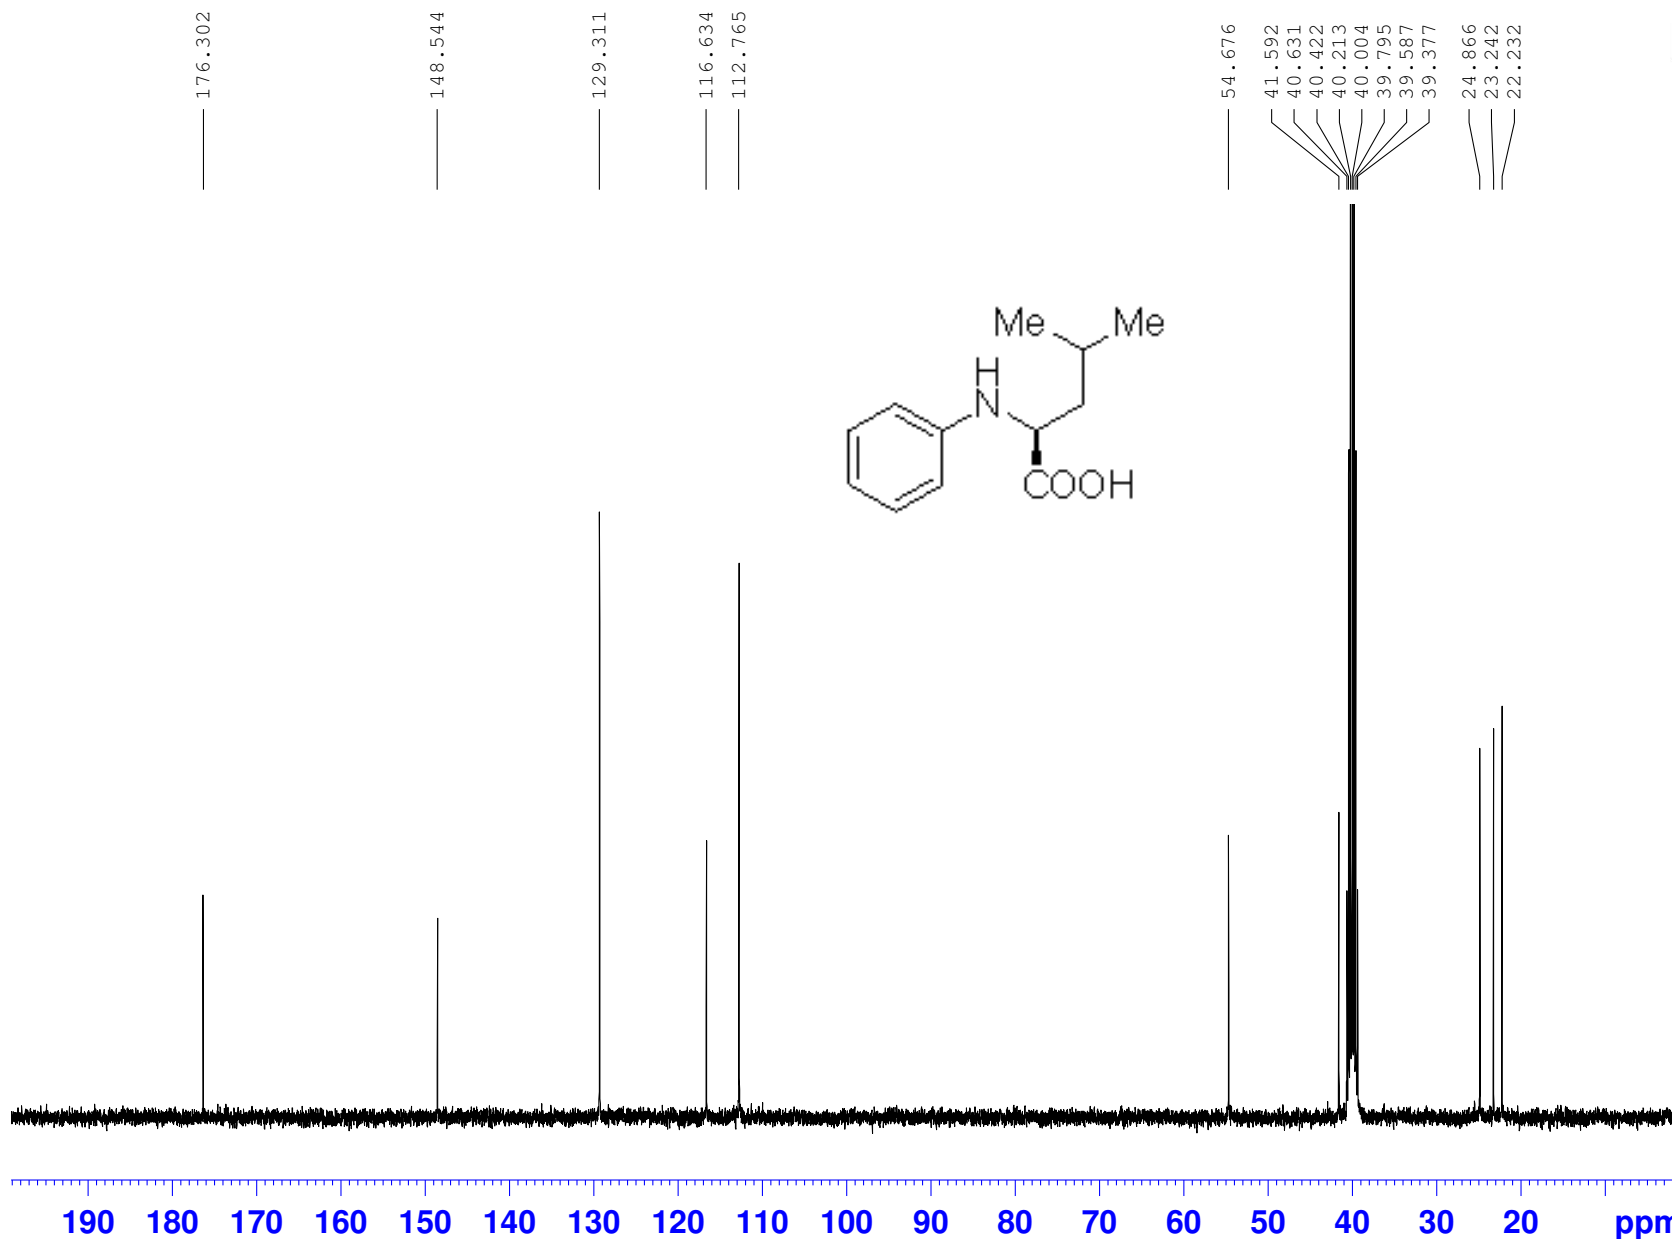

Current Data Parameters  
NAME wdp  
EXPNO 341  
PROCNO 1

F2 - Acquisition Parameters  
Date\_ 20081012  
Time 13.08  
INSTRUM spect  
PROBHD 5 mm PABBO BB-  
PULPROG zgpg30  
TD 65536  
SOLVENT DMSO  
NS 234  
DS 4  
SWH 23980.814 Hz  
FIDRES 0.365918 Hz  
AQ 1.3664756 sec  
RG 26008  
DW 20.850 usec  
DE 8.00 usec  
TE 301.6 K  
D1 2.00000000 sec  
d11 0.03000000 sec  
DELTA 1.89999998 sec  
TD0 1

==== CHANNEL f1 =====  
NUC1 13C  
P1 12.20 usec  
PL1 1.00 dB  
SFO1 100.6228298 MHz

==== CHANNEL f2 =====  
CPDPRG2 waltz16  
NUC2 1H  
PCPD2 80.00 usec  
PL12 15.39 dB  
PL13 15.50 dB  
PL2 0.00 dB  
SFO2 400.1316005 MHz

F2 - Processing parameters  
SI 32768  
SF 100.6127690 MHz  
WDW EM  
SSB 0  
LB 1.00 Hz  
GB 0  
PC 1.40
